# Supplementary material
Source: bioRxiv or medRxiv preprint supplement (https://medrxiv.org/content/medrxiv/early/2020/11/18/2020.11.17.20233460.1/DC1/embed/media-1.pdf)
Supplement: Supplementary file [file media-1.pdf]

## Supplementary Materials

### Table of Contents

|                                                                                                                                                        |            |
|--------------------------------------------------------------------------------------------------------------------------------------------------------|------------|
| <b>Supplementary Files</b> .....                                                                                                                       | <b>2</b>   |
| Supplementary File 1. PRISMA Checklist .....                                                                                                           | 2          |
| Supplementary File 2. Search Strategy .....                                                                                                            | 4          |
| Supplementary File 3. Tool for assessing study risk of bias .....                                                                                      | 9          |
| Supplementary File 4. Additional data analysis details .....                                                                                           | 12         |
| Supplementary File 5. Methods for selecting and gathering data on cumulative incidence and population size.....                                        | 15         |
| <b>Supplementary Tables</b> .....                                                                                                                      | <b>18</b>  |
| Supplementary Table 1. Characteristics of studies in the general population and primary seroprevalence estimates .....                                 | 18         |
| Supplementary Table 2. Characteristics of studies in the special populations and primary seroprevalence estimates .....                                | 50         |
| Supplementary Table 3. Risk of bias results .....                                                                                                      | 75         |
| Supplementary Table 4. Summary of seroprevalence data for general and special population sub-groups .....                                              | 103        |
| Supplementary Table 5. Summary of unadjusted meta-analysis results .....                                                                               | 104        |
| Supplementary Table 6. Summary of serological tests used.....                                                                                          | 105        |
| Supplementary Table 7. Summary of meta-regression results.....                                                                                         | 108        |
| <b>Supplementary Figures</b> .....                                                                                                                     | <b>109</b> |
| Supplementary Figure 1. Map of serosurvey distribution by global burden of disease region .....                                                        | 109        |
| Supplementary Figure 2. Seroprevalence to cumulative case incidence ratios using cumulative incidence on the same day as the serosurvey end date ..... | 110        |
| Supplementary Figure 3. Seroprevalence to cumulative case incidence ratios using cumulative incidence 14 days prior to the serosurvey end date .....   | 111        |
| <b>References</b> .....                                                                                                                                | <b>112</b> |

## Supplementary Files

### Supplementary File 1. PRISMA Checklist

| Section/topic                      | #  | Checklist item                                                                                                                                                                                                                                                                                              | Reported on page #                                                  |
|------------------------------------|----|-------------------------------------------------------------------------------------------------------------------------------------------------------------------------------------------------------------------------------------------------------------------------------------------------------------|---------------------------------------------------------------------|
| <b>TITLE</b>                       |    |                                                                                                                                                                                                                                                                                                             |                                                                     |
| Title                              | 1  | Identify the report as a systematic review, meta-analysis, or both.                                                                                                                                                                                                                                         | 1                                                                   |
| <b>ABSTRACT</b>                    |    |                                                                                                                                                                                                                                                                                                             |                                                                     |
| Structured summary                 | 2  | Provide a structured summary including, as applicable: background; objectives; data sources; study eligibility criteria, participants, and interventions; study appraisal and synthesis methods; results; limitations; conclusions and implications of key findings; systematic review registration number. | 2                                                                   |
| <b>INTRODUCTION</b>                |    |                                                                                                                                                                                                                                                                                                             |                                                                     |
| Rationale                          | 3  | Describe the rationale for the review in the context of what is already known.                                                                                                                                                                                                                              | 4                                                                   |
| Objectives                         | 4  | Provide an explicit statement of questions being addressed with reference to participants, interventions, comparisons, outcomes, and study design (PICOS).                                                                                                                                                  | 4                                                                   |
| <b>METHODS</b>                     |    |                                                                                                                                                                                                                                                                                                             |                                                                     |
| Protocol and registration          | 5  | Indicate if a review protocol exists, if and where it can be accessed (e.g., Web address), and, if available, provide registration information including registration number.                                                                                                                               | 5                                                                   |
| Eligibility criteria               | 6  | Specify study characteristics (e.g., PICOS, length of follow-up) and report characteristics (e.g., years considered, language, publication status) used as criteria for eligibility, giving rationale.                                                                                                      | 5                                                                   |
| Information sources                | 7  | Describe all information sources (e.g., databases with dates of coverage, contact with study authors to identify additional studies) in the search and date last searched.                                                                                                                                  | 5, Supplementary file 3, Supplementary file 4, Supplementary file 5 |
| Search                             | 8  | Present full electronic search strategy for at least one database, including any limits used, such that it could be repeated.                                                                                                                                                                               | 5 Supplementary file 2                                              |
| Study selection                    | 9  | State the process for selecting studies (i.e., screening, eligibility, included in systematic review, and, if applicable, included in the meta-analysis).                                                                                                                                                   | 5, Supplementary file 4                                             |
| Data collection process            | 10 | Describe method of data extraction from reports (e.g., piloted forms, independently, in duplicate) and any processes for obtaining and confirming data from investigators.                                                                                                                                  | 5, 6, Supplementary file 4                                          |
| Data items                         | 11 | List and define all variables for which data were sought (e.g., PICOS, funding sources) and any assumptions and simplifications made.                                                                                                                                                                       | 5, 6, 7                                                             |
| Risk of bias in individual studies | 12 | Describe methods used for assessing risk of bias of individual studies (including specification of whether this was done at the study or outcome level), and how this information is to be used in any data synthesis.                                                                                      | Supplementary file 3                                                |
| Summary measures                   | 13 | State the principal summary measures (e.g., risk ratio, difference in means).                                                                                                                                                                                                                               | 6-8, Supplementary file 4                                           |
| Synthesis of results               | 14 | Describe the methods of handling data and combining results of studies, if done, including measures of consistency (e.g., $I^2$ ) for each meta-analysis.                                                                                                                                                   | 6-8 Supplementary file 4                                            |

|                               |    |                                                                                                                                                                                                          |                                                    |
|-------------------------------|----|----------------------------------------------------------------------------------------------------------------------------------------------------------------------------------------------------------|----------------------------------------------------|
| Risk of bias across studies   | 15 | Specify any assessment of risk of bias that may affect the cumulative evidence (e.g., publication bias, selective reporting within studies).                                                             | N/A                                                |
| Additional analyses           | 16 | Describe methods of additional analyses (e.g., sensitivity or subgroup analyses, meta-regression), if done, indicating which were pre-specified.                                                         | 6-8, Supplementary file 4                          |
| <b>RESULTS</b>                |    |                                                                                                                                                                                                          |                                                    |
| Study selection               | 17 | Give numbers of studies screened, assessed for eligibility, and included in the review, with reasons for exclusions at each stage, ideally with a flow diagram.                                          | 9, 10                                              |
| Study characteristics         | 18 | For each study, present characteristics for which data were extracted (e.g., study size, PICOS, follow-up period) and provide the citations.                                                             | Supplementary table 1 and 2                        |
| Risk of bias within studies   | 19 | Present data on risk of bias of each study and, if available, any outcome level assessment (see item 12).                                                                                                | Figure 3, Supplementary table 3                    |
| Results of individual studies | 20 | For all outcomes considered (benefits or harms), present, for each study: (a) simple summary data for each intervention group (b) effect estimates and confidence intervals, ideally with a forest plot. | Supplementary table 1, 2                           |
| Synthesis of results          | 21 | Present results of each meta-analysis done, including confidence intervals and measures of consistency.                                                                                                  | 16, Supplementary table 4<br>Supplementary table 5 |
| Risk of bias across studies   | 22 | Present results of any assessment of risk of bias across studies (see Item 15).                                                                                                                          | N/A                                                |
| Additional analysis           | 23 | Give results of additional analyses, if done (e.g., sensitivity or subgroup analyses, meta-regression [see Item 16]).                                                                                    | 16, 17, Supplementary file 7                       |
| <b>DISCUSSION</b>             |    |                                                                                                                                                                                                          |                                                    |
| Summary of evidence           | 24 | Summarize the main findings including the strength of evidence for each main outcome; consider their relevance to key groups (e.g., healthcare providers, users, and policy makers).                     | 19-22                                              |
| Limitations                   | 25 | Discuss limitations at study and outcome level (e.g., risk of bias), and at review-level (e.g., incomplete retrieval of identified research, reporting bias).                                            | 21                                                 |
| Conclusions                   | 26 | Provide a general interpretation of the results in the context of other evidence, and implications for future research.                                                                                  | 22                                                 |
| <b>FUNDING</b>                |    |                                                                                                                                                                                                          |                                                    |
| Funding                       | 27 | Describe sources of funding for the systematic review and other support (e.g., supply of data); role of funders for the systematic review.                                                               | 23                                                 |

### **Supplementary File 2. Search Strategy**

The strategies for MEDLINE and EMBASE were an expanded version of the published COVID-19 search strategies created by OVID librarians for these databases<sup>1</sup> Search terms related to serologic testing were identified by infectious disease specialists (MC, CY, and JP)<sup>2</sup> and expanded using Medical Subject Heading (MeSH) or Emtree thesauri. These searches were adapted for the other databases.

We searched for grey literature using three approaches. First, we searched for pre-print articles via the Europe PMC platform. Second, we searched for reports from national and international health agencies using their website search functions and examining their recurring COVID-19 reports (World Health Organization, European Centres for Disease Control, Centres for Disease Control, National Institutes of Health). Third, we searched Google News for reports of seroprevalence studies. When we encountered reports of potentially eligible government, non-governmental organizations (NGO), or academic studies, we conducted a targeted Google search to locate and include the full study. All updates of routinely reported NGO and government studies (e.g., Public Health England's weekly COVID-19 serosurveillance reports) were screened after the date they first appeared in the Google News search.

We conducted two types of secondary searches. First, we consulted with international experts via e-mail to identify additional literature after all other sources had been searched. Second, we invited submission of seroprevalence study results on our live dashboard SeroTracker.com.

**Database: Ovid MEDLINE(R) and Epub Ahead of Print, In-Process & Other Non-Indexed Citations and Daily**

Dates: January 1, 2020 to August 28, 2020

Notes: Covid-19 search terms were adapted from Ovid Expert Searches

| #  | Search terms                                                                                                                                                                                                                                                                                                                                                                                                                                                                                        |
|----|-----------------------------------------------------------------------------------------------------------------------------------------------------------------------------------------------------------------------------------------------------------------------------------------------------------------------------------------------------------------------------------------------------------------------------------------------------------------------------------------------------|
| 1  | exp Coronavirus/                                                                                                                                                                                                                                                                                                                                                                                                                                                                                    |
| 2  | exp Coronavirus Infections/                                                                                                                                                                                                                                                                                                                                                                                                                                                                         |
| 3  | (coronavirus* or corona virus* or OC43 or NL63 or 229E or HKU1 or HCoV* or nCoV* or covid* or sars-cov* or sarscov* or Sars-coronavirus* or Severe Acute Respiratory Syndrome Coronavirus*).tw,kf.[EB2]                                                                                                                                                                                                                                                                                             |
| 4  | or/1-3                                                                                                                                                                                                                                                                                                                                                                                                                                                                                              |
| 5  | 4 not ((MERS or MERS-CoV or Middle East respiratory syndrome or camel* or dromedar* or equine or coronary or coronal or coudence* or covidien or influenza virus or HIV or bovine or calves or TGEV or feline or porcine or BCoV or PED or PEDV or PDCoV or FIPV or FCoV or SADS-CoV or canine or CCov or zoonotic or avian influenza or H1N1 or H5N1 or H5N6 or IBV).mp. or (animals/ not humans/))                                                                                                |
| 6  | ((pneumonia or covid* or coronavirus* or corona virus* or nCoV* or 2019-nCoV or sars* or virus).tw,kf. or exp pneumonia/) and Wuhan.tw,kf.                                                                                                                                                                                                                                                                                                                                                          |
| 7  | (2019-nCoV* or 2019nCoV* or nCoV19 or nCoV-19 or 2019-novel CoV or sars-cov2* or sars-cov-2* or sarscov2* or sarscov-2* or Sars-coronavirus2 or Sars-coronavirus-2 or SARS-like coronavirus* or coronavirus 2 or coronavirus2* or corona or coronavirus-19 or covid19 or covid-19 or covid 2019 or ((novel or new or nouveau) adj2 (CoV or nCoV or covid or coronavirus* or corona virus or Pandemi*2)) or ((covid or covid19* or covid-19) and pandemic*2) or (coronavirus* and pneumonia)).tw,kf. |
| 8  | COVID-19.rx,px,ox. or severe acute respiratory syndrome coronavirus 2.os.                                                                                                                                                                                                                                                                                                                                                                                                                           |
| 9  | or/6-8                                                                                                                                                                                                                                                                                                                                                                                                                                                                                              |
| 10 | 5 or 9                                                                                                                                                                                                                                                                                                                                                                                                                                                                                              |
| 11 | immunoglobulins/ or antibodies/ or antibodies, blocking/ or exp antibodies, neutralizing/ or antibodies, viral/ or antigen-antibody complex/ or immune sera/ or exp immunoglobulin isotypes/ or immunoglobulin a/ or immunoglobulin d/ or immunoglobulin e/ or immunoglobulin g/ or immunoglobulin m/                                                                                                                                                                                               |
| 12 | serologic tests/ or complement fixation tests/ or hemagglutination inhibition tests/ or neutralization tests/                                                                                                                                                                                                                                                                                                                                                                                       |
| 13 | immunoassay/ or fluoroimmunoassay/ or exp immunoblotting/ or immunoenzyme techniques/ or exp enzyme-linked immunosorbent assay/ or exp enzyme-linked immunospot assay/ or immunosorbent techniques/ or serologic tests/ or complement fixation tests/ or hemagglutination inhibition tests/ or neutralization tests/ or Serology/di                                                                                                                                                                 |
| 14 | (enzyme linked immunosorbent or enzyme-linked immunosorbent or ELISA or immunofluorescence or complement fixation or hemagglutination inhibition or immunoblot or western blot or neutrali*).tw,kf.                                                                                                                                                                                                                                                                                                 |
| 15 | (antibod* or immunoglobulin* or immune globulin* or titer* or isotype* or IgG or IgM or IgA or neutrali* or sera or serum or serolog* or saliva).tw,kf.                                                                                                                                                                                                                                                                                                                                             |
| 16 | or/11-14                                                                                                                                                                                                                                                                                                                                                                                                                                                                                            |
| 17 | seroepidemiologic studies/                                                                                                                                                                                                                                                                                                                                                                                                                                                                          |
| 18 | incidence/ or prevalence/                                                                                                                                                                                                                                                                                                                                                                                                                                                                           |
| 19 | (seroconver* or seroprevalence or sero-prevalence or seroincidence or sero-incidence or seroepidemiolog* or sero-epidemiolog*).mp.                                                                                                                                                                                                                                                                                                                                                                  |
| 20 | (inciden* or prevalen* or count* or rate*).mp.                                                                                                                                                                                                                                                                                                                                                                                                                                                      |
| 21 | (serosurvey or sero-survey or screen* or diagnostic).mp.                                                                                                                                                                                                                                                                                                                                                                                                                                            |
| 22 | (seroconver* or seroprevalence or sero-prevalence or seroincidence or sero-incidence or seroepidemiolog* or sero-epidemiolog* or inciden* or prevalen* or silent or asymptomatic or serosurvey or sero-survey).tw,kf.                                                                                                                                                                                                                                                                               |
| 23 | or/17-21                                                                                                                                                                                                                                                                                                                                                                                                                                                                                            |
| 24 | 10 and (16 and 23)                                                                                                                                                                                                                                                                                                                                                                                                                                                                                  |
| 25 | 10 and 15                                                                                                                                                                                                                                                                                                                                                                                                                                                                                           |
| 26 | 10 and 22                                                                                                                                                                                                                                                                                                                                                                                                                                                                                           |
| 27 | or/24-26                                                                                                                                                                                                                                                                                                                                                                                                                                                                                            |
| 28 | limit 27 to yr="2020-Current"                                                                                                                                                                                                                                                                                                                                                                                                                                                                       |
| 29 | remove duplicates from 28                                                                                                                                                                                                                                                                                                                                                                                                                                                                           |

**Database: Embase**

Dates: January 1, 2020 to August 28, 2020

Notes: Covid-19 search terms were adapted from Ovid Expert Searches

| #  | Searches                                                                                                                                                                                                                                                                                                                                                                                                                             |
|----|--------------------------------------------------------------------------------------------------------------------------------------------------------------------------------------------------------------------------------------------------------------------------------------------------------------------------------------------------------------------------------------------------------------------------------------|
| 1  | exp Coronavirus/                                                                                                                                                                                                                                                                                                                                                                                                                     |
| 2  | exp Coronavirus Infections/                                                                                                                                                                                                                                                                                                                                                                                                          |
| 3  | (coronavirus* or corona virus* or OC43 or NL63 or 229E or HKU1 or HCoV* or ncov* or covid* or sars-cov* or sarscov* or Sars-coronavirus* or Severe Acute Respiratory Syndrome Coronavirus*).tw,kw.                                                                                                                                                                                                                                   |
| 4  | or/1-3                                                                                                                                                                                                                                                                                                                                                                                                                               |
| 5  | 4 not ((MERS or MERS-CoV or Middle East respiratory syndrome or camel* or dromedar* or equine or coronary or coronal or covidence* or coviden or influenza virus or HIV or bovine or calves or TGEV or feline or porcine or BCoV or PED or PEDV or PDCoV or FIPV or FCoV or SADS-CoV or canine or CCov or zoonotic or avian influenza or H1N1 or H5N1 or H5N6 or IBV).mp. or (animals/ not humans/))                                 |
| 6  | ((pneumonia or covid* or coronavirus* or corona virus* or ncov* or 2019-ncov or sars*).tw,kw. or exp pneumonia/) and Wuhan.tw,kw.                                                                                                                                                                                                                                                                                                    |
| 7  | (2019-ncov or ncov19 or ncov-19 or 2019-novel CoV or sars-cov2 or sars-cov-2 or sarscov2 or sarscov-2 or Sars-coronavirus2 or Sars-coronavirus-2 or SARS-like coronavirus* or coronavirus-19 or covid19 or covid-19 or covid 2019 or ((novel or new or nouveau) adj2 (CoV or nCoV or covid or coronavirus* or corona virus or Pandemi*2)) or ((covid or covid19 or covid-19) and pandemic*2) or (coronavirus* and pneumonia)).tw,kw. |
| 8  | (coronavirus disease 2019 or severe acute respiratory syndrome coronavirus 2).sh,dj.                                                                                                                                                                                                                                                                                                                                                 |
| 9  | 6 or 7 or 8                                                                                                                                                                                                                                                                                                                                                                                                                          |
| 10 | 5 or 9                                                                                                                                                                                                                                                                                                                                                                                                                               |
| 11 | virus antibody/ec [Endogenous Compound]                                                                                                                                                                                                                                                                                                                                                                                              |
| 12 | neutralizing antibody/ec [Endogenous Compound]                                                                                                                                                                                                                                                                                                                                                                                       |
| 13 | exp immunoglobulin/ or exp immunoglobulin A antibody/ or exp immunoglobulin class/ or exp immunoglobulin M antibody/ or exp immunoglobulin G antibody/ or exp immunoglobulin antibody/                                                                                                                                                                                                                                               |
| 14 | 11 or 12 or 13                                                                                                                                                                                                                                                                                                                                                                                                                       |
| 15 | serology/                                                                                                                                                                                                                                                                                                                                                                                                                            |
| 16 | serodiagnosis/ or complement fixation test/ or hemagglutination inhibition test/ or hemolytic plaque assay/                                                                                                                                                                                                                                                                                                                          |
| 17 | fluorescent antibody technique/                                                                                                                                                                                                                                                                                                                                                                                                      |
| 18 | immunofluorescence test/ or viral disease immunofluorescence assay/                                                                                                                                                                                                                                                                                                                                                                  |
| 19 | enzyme linked immunosorbent assay/                                                                                                                                                                                                                                                                                                                                                                                                   |
| 20 | western blotting/                                                                                                                                                                                                                                                                                                                                                                                                                    |
| 21 | (enzyme linked immunosorbent or enzyme-linked immunosorbent or ELISA or immunoassay or immunofluorescence or fluorescent antibody or complement fixation or hemagglutination inhibition or hemolytic plaque assay or immunoblot or western blot or neutrali*).tw,kw.                                                                                                                                                                 |
| 22 | (antibod* or immunoglobulin* or immune globulin* or titer* or isotype* or IgG or IgM or IgA or neutrali* or sera or serolog* or serum or saliva).tw,kw.                                                                                                                                                                                                                                                                              |
| 23 | 15 or 16 or 17 or 18 or 19 or 20 or 21                                                                                                                                                                                                                                                                                                                                                                                               |
| 24 | 14 or 23                                                                                                                                                                                                                                                                                                                                                                                                                             |
| 25 | exp seroepidemiology/                                                                                                                                                                                                                                                                                                                                                                                                                |
| 26 | *prevalence/                                                                                                                                                                                                                                                                                                                                                                                                                         |
| 27 | *incidence/                                                                                                                                                                                                                                                                                                                                                                                                                          |
| 28 | (seroconver* or seroprevalence or sero-prevalence or seroincidence or sero-incidence or seroepidemiolog* or sero-epidemiolog* or inciden* or prevalen* or count* or rate* or serosurvey or sero-survey or screen* or diagnostic).mp.                                                                                                                                                                                                 |
| 29 | (seroconver* or seroprevalence or sero-prevalence or seroincidence or sero-incidence or seroepidemiolog* or sero-epidemiolog* or inciden* or prevalen* or silent or asymptomatic or serosurvey or sero-survey).tw,kw.                                                                                                                                                                                                                |
| 30 | 25 or 26 or 27 or 28                                                                                                                                                                                                                                                                                                                                                                                                                 |
| 31 | 10 and (24 and 30)                                                                                                                                                                                                                                                                                                                                                                                                                   |
| 32 | 10 and 22                                                                                                                                                                                                                                                                                                                                                                                                                            |
| 33 | 10 and 29                                                                                                                                                                                                                                                                                                                                                                                                                            |
| 34 | 31 or 32 or 33                                                                                                                                                                                                                                                                                                                                                                                                                       |
| 35 | limit 34 to yr="2020-Current"                                                                                                                                                                                                                                                                                                                                                                                                        |
| 36 | remove duplicates from 35                                                                                                                                                                                                                                                                                                                                                                                                            |

**Database: Web of Science Core Collection**

Date: January 1, 2020 to August 28, 2020

| #  | Searches                                                                                                                                                                                                                                                                                                                                                                    |
|----|-----------------------------------------------------------------------------------------------------------------------------------------------------------------------------------------------------------------------------------------------------------------------------------------------------------------------------------------------------------------------------|
| 1  | TS=(coronavirus* or corona virus* or OC43 or NL63 or 229E or HKU1 or HCoV* or ncov* or covid* or sars-cov* or sarscov* or Sars-coronavirus* or Severe Acute Respiratory Syndrome Coronavirus*)                                                                                                                                                                              |
| 2  | TS=(MERS or MERS-CoV or Middle East respiratory syndrome or camel* or dromedar* or equine or coronary or coronal or covidence* or covidien or influenza virus or HIV or bovine or calves or TGEV or feline or porcine or BCoV or PED or PEDV or PDCoV or FIPV or FCoV or SADS-CoV or canine or CCov or zoonotic or avian influenza or H1N1 or H5N1 or H5N6 or IBV)          |
| 3  | #1 NOT #2                                                                                                                                                                                                                                                                                                                                                                   |
| 4  | TS=((pneumonia or covid* or coronavirus* or corona virus* or ncov* or 2019-ncov or sars* or virus) AND Wuhan)                                                                                                                                                                                                                                                               |
| 5  | TS=(2019-ncov* or 2019nCov* or ncov19 or ncov-19 or 2019-novel CoV or sars-cov2* or sars-cov-2* or sarscov2* or sarscov-2* or Sars-coronavirus2 or Sars-coronavirus-2 or SARS-like coronavirus* or corona or coronavirus-19 or covid19 or covid-19 or covid 2019 or (novel or new or nouveau) adj2 (CoV or nCoV or covid or coronavirus*)) or (coronavirus* and pneumonia). |
| 6  | TS=(COVID-19 or "severe acute respiratory syndrome coronavirus")                                                                                                                                                                                                                                                                                                            |
| 7  | #6 OR #5 OR #4 OR #3                                                                                                                                                                                                                                                                                                                                                        |
| 8  | TS=(antibod* or immunoglobulin* or immune globulin* or titer* or isotype* or IgG or IgM or IgA or neutralization or sera or serolog* or saliva or serum).                                                                                                                                                                                                                   |
| 9  | TS=("enzyme linked immunosorbent assay" or "enzyme-linked immunosorbent assay" or "immunoenzyme" or ELISA or "lateral flow immunoassay" or LFIA or "immunofluorescence assay" or immunochromatography or "complement fixation test" or "hemagglutination inhibition" or immunoblot or "western blot" or "neutralization assay")                                             |
| 10 | #9 OR #8                                                                                                                                                                                                                                                                                                                                                                    |
| 11 | TI=(seroconversion or seroprevalence or seroincidence or seroepidemiolog* or incidence or prevalence or asymptomatic or sero-survey*) or AK=(seroconversion or seroprevalence or seroincidence or seroepidemiolog* or incidence or prevalence or asymptomatic or sero-survey*)                                                                                              |
| 12 | ALL=(prevalence or incidence or seroconversion or seroconvert or seroprevalence or seroincidence or seroepidemiolog* or serosurvey or sero-survey or survey or screen* or diagnostic test)                                                                                                                                                                                  |
| 13 | #12 AND #10 AND #7                                                                                                                                                                                                                                                                                                                                                          |
| 14 | #11 AND #7                                                                                                                                                                                                                                                                                                                                                                  |
| 15 | TI=(antibod* or immunoglobulin* or immune globulin* or titer* or isotype* or IgG or IgM or IgA or neutralization or sera or serolog* or saliva or serum).                                                                                                                                                                                                                   |
| 16 | #15 AND #7                                                                                                                                                                                                                                                                                                                                                                  |
| 17 | #16 OR #14 OR #13                                                                                                                                                                                                                                                                                                                                                           |

**Database: Europe PMC [Secondary search for pre-prints]**

Dates: January 1, 2020 to August 28, 2020

| # | Searches                                                                                                                                                                                                                                                                                                                                                                                                                                                                              |
|---|---------------------------------------------------------------------------------------------------------------------------------------------------------------------------------------------------------------------------------------------------------------------------------------------------------------------------------------------------------------------------------------------------------------------------------------------------------------------------------------|
|   | ("2019-nCoV" OR "2019nCoV" OR "COVID-19" OR "SARS-CoV-2" OR "COVID19" OR "COVID" OR "SARS-nCoV" OR ("wuhan" AND "coronavirus") OR "Coronavirus" OR "Corona virus" OR "corona-virus" OR "corona viruses" OR "coronaviruses" OR "SARS-CoV" OR "Severe Acute Respiratory Syndrome Coronavirus" OR ("SARS" AND "coronavirus")) AND ABSTRACT:(sera* OR sero* OR immun* OR Ig* OR "enzyme-linked immunosorbent assay" OR ELISA OR "neutralization assay" OR seroprevalence) AND (SRC:"PPR") |

**Sources: Health organizations**

Dates: January 1, 2020 to August 28, 2020

| Source                                                   | Search strategy |                                                                   |
|----------------------------------------------------------|-----------------|-------------------------------------------------------------------|
| WHO Situation Reports                                    | 1               | "antibod", "sero", "immun", "ELISA"                               |
| National Institutes of Health                            | 1               | ("COVID" OR "SARS-CoV-2")                                         |
|                                                          | 2               | ("sero*" OR "antibod*" OR "immun*" OR "RDT" OR "ELISA" OR "LFIA") |
|                                                          | 3               | allintext:(1 AND 2) site:nih.gov -site:ncbi.nlm.nih.gov           |
|                                                          | 3               | 2 AND 3                                                           |
| United States Centres for Disease Control and Prevention | 1               | ("COVID" OR "SARS-CoV-2")                                         |
|                                                          | 2               | ("sero*" OR "antibod*" OR "immun*" OR "RDT" OR "ELISA" OR "LFIA") |
|                                                          | 3               | allintext:(1 AND 2) site:cdc.gov                                  |
|                                                          | 5               | 2 AND 3                                                           |
| European Centres for Disease Control and Prevention      | 1               | ("COVID" OR "SARS-CoV-2")                                         |
|                                                          | 2               | ("sero*" OR "antibod*" OR "immun*" OR "RDT" OR "ELISA" OR "LFIA") |
|                                                          | 3               | allintext:(1 AND 2) site:ecdc.europa.eu                           |
|                                                          | 5               | 2 AND 3                                                           |

**Sources: Google News**

Dates: January 1, 2020 to August 28, 2020

| Source      | Search strategy |                                                                                                                                                                                               |
|-------------|-----------------|-----------------------------------------------------------------------------------------------------------------------------------------------------------------------------------------------|
| Google news | 1               | (antibody OR antibodies OR surveillance OR screen OR serology OR serological OR serosurvey OR ELISA OR LFIA OR assay OR blood OR serum OR immune OR immunity OR herd immunity OR random test) |



### Supplementary File 3. Tool for assessing study risk of bias

| Item 1: Was the sample frame appropriate to address the target population? |                                                                                                                                                                                                                                                                                                                                                                                                                                                                                                                                                                                                                                                                                                                                                                                         |
|----------------------------------------------------------------------------|-----------------------------------------------------------------------------------------------------------------------------------------------------------------------------------------------------------------------------------------------------------------------------------------------------------------------------------------------------------------------------------------------------------------------------------------------------------------------------------------------------------------------------------------------------------------------------------------------------------------------------------------------------------------------------------------------------------------------------------------------------------------------------------------|
| Yes                                                                        | Sample frame described and it approximated the target population                                                                                                                                                                                                                                                                                                                                                                                                                                                                                                                                                                                                                                                                                                                        |
| No                                                                         | Sample frame did not approximate the target population (e.g., blood donors do not represent general population, doctors do not represent all health care providers)                                                                                                                                                                                                                                                                                                                                                                                                                                                                                                                                                                                                                     |
| Exclude                                                                    | Sample frame not described                                                                                                                                                                                                                                                                                                                                                                                                                                                                                                                                                                                                                                                                                                                                                              |
| *Notes                                                                     | The term “target population” should not be taken to infer every individual from everywhere or with similar disease or exposure characteristics. Instead, give consideration to specific population characteristics in the study, including age range, gender, morbidities, medications, and other potentially influential factors. For example, a sample frame may not be appropriate to address the target population if a certain group has been used (such as those working for one organisation, or one profession) and the results then inferred to the target population (i.e. working adults). A sample frame may be appropriate when it includes almost all the members of the target population (i.e. a census, or a complete list of participants or complete registry data). |

| Item 2: Were study participants recruited in an appropriate way? |                                                                                                            |
|------------------------------------------------------------------|------------------------------------------------------------------------------------------------------------|
| Yes                                                              | Probability sampling method (simple or stratified random) or entire sample (e.g., an entire town) was used |
| No                                                               | Non-probability sampling                                                                                   |
| Exclude                                                          | Sampling method not reported                                                                               |

| Item 3: Was the sample size adequate? |                                                                                                                                                                                                                                                                                                                                                                                                                                                                                                                                                                                                                                              |
|---------------------------------------|----------------------------------------------------------------------------------------------------------------------------------------------------------------------------------------------------------------------------------------------------------------------------------------------------------------------------------------------------------------------------------------------------------------------------------------------------------------------------------------------------------------------------------------------------------------------------------------------------------------------------------------------|
| Yes                                   | >599                                                                                                                                                                                                                                                                                                                                                                                                                                                                                                                                                                                                                                         |
| No                                    | <599                                                                                                                                                                                                                                                                                                                                                                                                                                                                                                                                                                                                                                         |
| Exclude                               | Sample size not reported                                                                                                                                                                                                                                                                                                                                                                                                                                                                                                                                                                                                                     |
| *Notes                                | To calculate the required sample size we used an assumed prevalence of 2.5%, which was the global average estimated by the WHO in April, 2020. <sup>3</sup> Based on guidance by the Joanna Briggs Institute and published medical statistical recommendations we selected a precision value that was half the assumed prevalence (1.25%) <sup>4,5</sup> We calculated a minimum sample size of 599 using these inputs:<br>Sample size calculation: $n = \frac{Z^2 P(1-P)}{d^2}$<br>Where n = sample size;<br>Z = Z statistic for level of confidence (95%);<br>P = expected prevalence (2.5% WHO global estimate);<br>d = precision (1.25%) |

| Item 4: Were the study subjects and setting described in detail? |                                                                                      |
|------------------------------------------------------------------|--------------------------------------------------------------------------------------|
| Yes                                                              | Average age and distribution of gender/sex provided                                  |
| No                                                               | Neither age or gender/sex is provided, or only one of age and gender/sex is provided |

| <b>Item 5: Was data analysis conducted with sufficient coverage of the identified sample?</b> |                                                                                                                                      |
|-----------------------------------------------------------------------------------------------|--------------------------------------------------------------------------------------------------------------------------------------|
| Yes                                                                                           | The demographic characteristics (gender/sex, age, and ethnicity) of the sample is at least somewhat representative of the population |
| No                                                                                            | The demographic characteristics (gender/sex, age, and ethnicity) of the sample is not representative of the population               |
| Unclear                                                                                       | Information is not provided about demographic characteristics of the sample (gender/sex, age, and ethnicity)                         |

| <b>Item 6: Were valid methods used for the identification of the condition?</b> |                                                                                                                                                                                               |
|---------------------------------------------------------------------------------|-----------------------------------------------------------------------------------------------------------------------------------------------------------------------------------------------|
| Yes                                                                             | The test used met the FDA standards for Emergency Use Authorizations for COVID-19 serological tests: sensitivity minimum 90%, specificity minimum 95%, as reported in the study. <sup>6</sup> |
| No                                                                              | The test used did not meet the FDA standards for Emergency Use Authorizations for COVID-19 serological tests: sensitivity minimum 90%, specificity minimum 95%.                               |
| Exclude                                                                         | Test sensitivity and specificity not reported                                                                                                                                                 |

| <b>Item 7: Was the condition measured in a standard, reliable way for all participants?</b> |                                                                                 |
|---------------------------------------------------------------------------------------------|---------------------------------------------------------------------------------|
| Yes                                                                                         | The same serology test was used for all participants                            |
| No                                                                                          | Different serology tests were used for participants                             |
| Unclear                                                                                     | No details were provided about which participants received which serology tests |

| <b>Item 8: Was there appropriate statistical analysis?</b> |                                                                                                                                                                                                                                                                                                                                                                                    |
|------------------------------------------------------------|------------------------------------------------------------------------------------------------------------------------------------------------------------------------------------------------------------------------------------------------------------------------------------------------------------------------------------------------------------------------------------|
| Yes                                                        | Does all of the following: corrects for population characteristics or the sample is somewhat representative of the population (probability sampling), corrects for test characteristics, and provides the information necessary to determine the numerator, denominator, prevalence estimate, and confidence interval.                                                             |
| No                                                         | Does not correct for population characteristics and the sample is not likely representative of the population (non-probability sampling), does not correct for test or provide the information necessary to correct for test characteristics, or does not provide the information necessary to determine the numerator, denominator, prevalence estimate, and confidence interval. |

| <b>Item 9: Was the response rate adequate, and if not, was the low response rate managed appropriately?</b> |                                                                                                                                                                   |
|-------------------------------------------------------------------------------------------------------------|-------------------------------------------------------------------------------------------------------------------------------------------------------------------|
| Yes                                                                                                         | Response rate > 60% or the demographics of the sample were a reasonable match to those of the target population                                                   |
| No                                                                                                          | Response rate < 60% and the demographics of the sample were not a reasonable match to those of the target population                                              |
| Unclear                                                                                                     | Response rate not provided and it was unclear if the demographics of the sample differed from the target population                                               |
| *Notes                                                                                                      | <a href="https://onlinelibrary.wiley.com/doi/full/10.1111/j.1753-6405.2012.00854.x">https://onlinelibrary.wiley.com/doi/full/10.1111/j.1753-6405.2012.00854.x</a> |

| <b>Item 10: Overall risk of bias</b> |                                                                                                                                                                                                                                                                                                                                                                                                                                                                                                                  |
|--------------------------------------|------------------------------------------------------------------------------------------------------------------------------------------------------------------------------------------------------------------------------------------------------------------------------------------------------------------------------------------------------------------------------------------------------------------------------------------------------------------------------------------------------------------|
| Low                                  | The estimates are very likely correct for the target population. To obtain a low risk of bias classification, all criteria must be met or departures from the criteria must be minimal and unlikely to impact on the validity and reliability of the prevalence estimate. These include sample sizes that are just below the threshold when all other criteria are met, reporting only some of characteristics of the sample, test characteristics below the threshold but corrections for the test performance. |
| Moderate                             | The estimates are likely correct for the target population. To obtain a moderate risk of bias classification, most criteria must be met and departures from the criteria are likely to have only a small impact on the validity and reliability of the prevalence estimates.                                                                                                                                                                                                                                     |
| High                                 | The estimates are not likely correct for the target population. To obtain a high risk of bias, many criteria must not be met or departures from criteria are likely to have a major impact on the validity and reliability of the prevalence estimates.                                                                                                                                                                                                                                                          |
| Unclear                              | There was insufficient information to assess the risk of bias.                                                                                                                                                                                                                                                                                                                                                                                                                                                   |

## Supplementary File 4. Additional data analysis details

### Sub-group data extraction

We extracted sub-group data when they were stratified by one variable (e.g., seniors) but not two variables (e.g., female seniors). Antibody isotype and time period were not considered as stratifying variables.

### Counting articles and studies

If multiple articles provided unique information about a study, both were included. Articles reporting identical information to previously included articles were excluded as duplicates.

We defined a single study as an effort to test a defined population over a specified period of time to estimate the prevalence of SARS-CoV-2 antibodies.<sup>7</sup> Articles that provided information on two or more distinct cohorts (different sample frames or different samples at different time points) without a pooled estimate were considered to be multiple studies.

### Data Processing and Descriptive Statistics

Data processing and descriptive statistics were conducted in Python. The packages used were as follows: data manipulation: numpy, pandas, geopandas; Bayesian analysis: PyStan, arviz; regression modelling: statsmodels; data visualization: matplotlib, seaborn.

### Grouping variables for analysis

Each study was grouped according to the WHO's seven Global Burden of Disease (GBD) regions, as well as by the income status (high vs. low/middle) which is embedded in the GBD categories.<sup>8,9</sup>

#### Age

Estimates were classified into four groups based on the reported ages of the included study participants: children (0-12), youth (13-17), adults (18-64), and seniors (65+). The following rules were used to categorize estimates when studies included participants of different ages:

- Participant age mean/median: select the category that it falls within
  - Participant age mean +/- SD: selected all categories within one standard deviation on either side of the mean
  - Participant age median and interquartile range: selected all categories that were included in the interquartile range
- Total age ranges: The age range needed to cover 30% or more of an age category to be classified in that category. As such, thresholds defining 30% for each category were defined.
  - Children: Include "Children" tag if age minimum was 8 or lower.
  - Youth: Include "Youth" tag if the age maximum of a younger group was 14 or higher
  - Youth: Include "Youth" tag if age minimum of an older group was 16 or lower
  - Adults: Include "Adults" tag if age minimum was 57 or lower
  - Adults: Include "Adults" tag if age maximum was 25 or higher.
  - Adults: Include "Adults" tag if age not reported but sample frame was health care workers
  - Seniors: Include "Seniors" tag if age maximum was 70 or higher.
    - For the seniors category, an upper limit of 72 was used (WHO reported world-wide life expectancy) in order to determine a 30% overlap<sup>10</sup>

#### Dates

When explicit dates were not provided, we inferred dates based on the reporting sampling where possible using the following rules:

- Description of a single month: selected first and last date of month
  - Example: "Samples were gathered in April" = April 1 - 30
- Description of a full month as part of a range: selected mid-month
  - Example: "Samples were gathered from April to June" = April 15 to June 15
- Description of early month: selected first two weeks as start and end end (14 days)
  - Example: "Samples were gathered in early April" = April 1 to April 13
- Description of mid-month: selected middle two weeks (14 days)
  - Example: "Samples were gathered in mid April" = April 6 to April 19
- Description of late month: selected the last two weeks as start and end date (14 days)

- Example: “Samples were gathered in late April” = April 17 to April 30

### Test correction

The sensitivity and specificity values for correction were derived, in order of preference, from: (i) the FINDDx-McGill database of independent evaluations of serological tests<sup>11</sup>; (ii) independent test evaluations conducted by serosurvey investigators and reported alongside serosurvey findings; (iii) manufacturer-reported sensitivity and specificity; (iv) published pooled sensitivity and specificity by immunoassay type.<sup>12</sup> If uncorrected estimates were unavailable, we used author-reported corrected seroprevalence estimates in lieu of performing our own correction. Details of this order of priority follow:

1. The FINDDx-McGill database of independent evaluations of serological tests.<sup>11</sup> We only considered evaluations reporting both sensitivity and specificity for test performance across all sickness days (as opposed to day 1, day 5, etc). Where multiple evaluations were available, we prioritized in the following order:
  - a. The evaluation needed to match the test name, manufacturer, and target isotype used in the study
  - b. The evaluation needed to match the sample specimen type used in the study
    - i. For sample types that were not reported in either the test evaluation or the serosurvey study we assumed whole blood was used for LFIA tests and serum/plasma was used for non-LFIA tests
    - ii. Plasma/Serum were used interchangeable when no direct match for index sample type was available
  - c. Prioritized reference specimen type which yield the most virus according to a systematic review and meta-analysis published in July 2020 that compared RT-PCR positivity of different specimens<sup>13</sup>
    - i. It was assumed that “respiratory specimen” was referring to upper respiratory specimen as a conservative assumption as these viral loads are lower than bronchoalveolar lavage or sputum. We ranked it along side throat swab.
    - ii. “Lower respiratory specimen” was ranked with with bronchoalveolar lavage fluid
    - iii. “Upper respiratory specimen” was ranked with throat swab
    - iv. If a mixed reference sample was used in the independent evaluation then an even distribution of sample types was assumed; the average % yield of the viral load was calculated and the sample type was ranked accordingly
  - d. Largest sample size
2. Serological test evaluations conducted by study authors, where those authors were at arms length from the design of the study in questions
3. Manufacturer-reported sensitivity and specificity, which includes evaluations of in-house serological tests published by the research group that developed the same test
4. Published pooled sensitivity and specificity results for ELISAs, LFIAs, and CLIAs, based on the test type known to have been used, and using the definitions for these test types provided in the cited article.<sup>12</sup>

Where crude estimates were unavailable, we used author-reported corrected seroprevalence estimates in lieu of performing our own correction. When none of the above corrections were possible, we excluded estimates from further analysis. Where evaluation sample sizes were not reported (primarily for manufacturer-conducted evaluations), we used the minimum required sample sizes for US Food and Drug Administration Emergency Use Authorization approval (30 true positive samples, 80 true negative samples).

Using the best available sensitivity and specificity values and the corresponding denominators, we corrected seroprevalence estimates for test sensitivity and specificity using Bayesian measurement error models, with binomial test evaluation data for test sensitivity and specificity, as described in Section 2 of Gelman and Carpenter (2020).<sup>14</sup> We built the Bayesian model described therein using the statistical package PyStan.

For each seroprevalence estimate, we used the matching seroprevalence, sensitivity, and specificity, and the corresponding denominators, to fit the specified model. The model was fit with four chains and 2000 iterations per chain (1000 warmup, 1000 sampling iterations). A model fit was considered “good” if said fit met all five of PyStan’s Hamiltonian Monte Carlo diagnostic criteria (no iterations ending with a divergence, no iterations saturating the max tree depth of 10, effective Bayesian fraction of missing information over 0.2 for all chains, a R-hat value between 0.9 and 1.1 for all parameters, the effective sample size  $n_{eff}$  being at least 0.001x the number of

iterations).<sup>15</sup> Model fits not meeting these criteria were discarded, and the model was rerun until five good fits were obtained for each seroprevalence estimate.

Corrected seroprevalence values were obtained for each model fit by taking the expectation of the true prevalence parameter across all sampling iterations. For each seroprevalence estimate, the corrected seroprevalence was taken to be the median corrected seroprevalence across the five good model fits. The credible interval was defined as the highest posterior density interval (equivalent to the shortest credible interval for these unimodal distributions), and was calculated using the `hpd` function from the `arviz` package.

### **Calculating Overall Seroprevalence Estimates**

Some studies did not report a single overall seroprevalence estimate. In most cases, this was because the study reported different sets of results for different non-overlapping subsets of the data: e.g., for multiple non-overlapping time points (e.g., May and June 2020), multiple distinct populations (e.g., teachers and schoolchildren), or multiple non-overlapping regions (e.g., two regions of the same city). In these cases, we pooled these non-overlapping seroprevalence estimates to generate one overall seroprevalence estimate by taking the total numerator across all estimates and dividing by the total denominator across all estimates. We considered the sampling time frame of these pooled estimates to be the full range of sampling dates; the population studied to be the combination of the distinct populations examined; and the geography examined to be the combination of geographies studied. We used the same procedure to generate overall estimates for subgroups, where necessary (e.g., when separate estimates for doctors and nurses were reported, we used this procedure to calculate an overall health care worker estimate if one was not already provided).

In some cases, studies did not report a single overall seroprevalence estimate because they reported different sets of results for different assays. When studies reported estimates derived from multiple assays used in combination, we prioritized a sub-group estimate based on a single test using the following prioritization (i) independent evaluation available; (ii) pan-Ig: IgG +/- IgM/IgA; IgM +/- IgA; IgA; (iii); highest combined sensitivity and specificity value. These prioritization criteria were designed to minimize bias: using data from independent evaluations is the most reliable way to correct seroprevalence estimates for test sensitivity and specificity; non-IgG antibodies appear to decline over time, especially among individuals without repeated exposure, while IgG antibodies against the spike protein appear to persist for at least three to five months after infection; and estimates that use tests with the highest sensitivity and specificity likely exhibit the least bias to begin with.<sup>16-19</sup>

### **Population differences in seroprevalence**

Male and female estimates were included in the sex/gender analysis, with Female as the reference group. Estimates from White, Black, and Asian people were included for the race/ethnicity analysis, with White as the reference group. Youth (0-17), adult (18-64), and older adult (65+) estimates were included for the age analysis, with adults as the reference group. When reported age groups did not conform to these categories, they were treated as the category with which they most overlapped. Reported age groups with substantial overlap with multiple categories were excluded from this analysis. Health care workers and caregivers and the general population were included in the occupation analysis. Known and no known contact with a positive COVID-19 case were included in the exposure level analysis.

## Supplementary File 5. Methods for selecting and gathering data on cumulative incidence and population size

### Evidence-based timeline for COVID-19 clinical course and cumulative case data collection

- Day 0: Symptom onset
  - FYI: Exposure occurs a mean of -5 days from symptom onset<sup>17</sup>
- Day 5: Confirmation on pneumonia
  - Median of 5 days from symptom onset to confirmation of pneumonia<sup>20,21</sup>
  - This is the assumed days of diagnosis
- Day 7: Presentation to hospital
  - Median of 7 days from symptom onset to presentation to hospital<sup>22</sup>
  - Alternative assumption for day of diagnosis
- Day 14: Seroconversion
  - Median of 14 days from symptom onset to seroconversion (IgG)<sup>23</sup>
  - Therefore, cumulative case data from -14 days from the serosurvey sampling end date would correspond to the seroconverted patients from the study

### Data collection decisions

- Three cumulative case dates were selected for analyses based on the evidence above:
  - Primary analysis: -9 days before serosurvey sampling end date, which assumes that the day of radiological confirmation of pneumonia is approximately equivalent to the reporting date for laboratory confirmed cases of COVID-19. This corresponds to a median of 5 days after symptom onset and assumes a median of 14 days from symptom onset to seroconversion
  - Sensitivity analysis: same day of serosurvey sampling end date (0 days), which is a United States Centres for Disease Control recommended timeframe to account for lags in presentation of patients for testing and in reporting of case data – this may correspond to patients with mild disease
  - Sensitivity analysis: -14 days before serosurvey sampling end date, which accounts for patients that present for testing early (pre-symptomatic) and that may receive a case diagnosis in close proximity to the day of their symptom onset

### Sources of data on cumulative incidence and population size

For studies targeting the general population, we gathered the number of total confirmed SARS-CoV-2 infections at zero days, nine days, and fourteen days before the study end-date. We extracted case and population data matching the study sample frame (e.g., province-level case counts for provincial studies). Our sources were, in order of preference: the Johns Hopkins University (JHU) COVID-19<sup>24</sup> tracker, with population denominators from the UN Population Division estimates<sup>25</sup>; the worldwide COVID-19 data source list from the European Centres for Disease Control<sup>26,27</sup>; and targeted Google searches for government, NGO, and health system

Where possible data were obtained from the John Hopkins COVID-19 tracker through the John Hopkins Center for Systems Science and Engineering GitHub repository.<sup>28</sup> If the John Hopkins COVID-19 tracker did not provide the necessary case count data, the worldwide COVID-19 data source list provided by the European Centres for Disease Control (CDC) was accessed.<sup>26,27</sup> If neither of these sources provided the necessary case count data, then we attempted to obtain data from government, NGO and health system reports, locating these reports from the citations on the 2019-2020 coronavirus Wikipedia page for that country or territory.<sup>29</sup>

The John Hopkins COVID-19 tracker was also used to determine the date of the 100th case for each country and calculate the time since the 100th case for each included study.

The terminal data sources used for national, regional, local and sublocal case counts when John Hopkins COVID-19 and European CDC data were unavailable are listed below:

Austria

[https://covid19-dashboard.ages.at/dashboard\\_Tod.html](https://covid19-dashboard.ages.at/dashboard_Tod.html)

Brazil

[https://brasil.io/dataset/covid19/caso\\_full/](https://brasil.io/dataset/covid19/caso_full/)

Canada

<https://www.canada.ca/en/public-health/services/diseases/2019-novel-coronavirus-infection.html>

China

[http://en.hubei.gov.cn/special/coronavirus\\_2019/update\\_2019ncov/](http://en.hubei.gov.cn/special/coronavirus_2019/update_2019ncov/)

Denmark

<https://www.ssi.dk/sygdomme-beredskab-og-forskning/sygdomsovervaagning/c/covid19-overvaagning>

Ecuador

<https://www.coronavirusecuador.com/datos-provinciales/>

France

<https://www.data.gouv.fr/fr/datasets/donnees-relatives-aux-tests-de-depistage-de-covid-19-realises-en-laboratoire-de-ville/> (Covid-19 cases before May 13, 2020)

<https://www.data.gouv.fr/fr/datasets/donnees-relatives-aux-resultats-des-tests-virologiques-covid-19/> (Covid-19 cases after May 13, 2020)

Germany

[https://experience.arcgis.com/experience/478220a4c454480e823b17327b2bf1d4/page/page\\_1/](https://experience.arcgis.com/experience/478220a4c454480e823b17327b2bf1d4/page/page_1/)

[https://www.rki.de/DE/Content/InfAZ/N/Neuartiges\\_Coronavirus/Situationsberichte/Gesamt.html](https://www.rki.de/DE/Content/InfAZ/N/Neuartiges_Coronavirus/Situationsberichte/Gesamt.html)

India

<https://api.covid19india.org/>

Italy

<https://github.com/pcm-dpc/COVID-19>

Ireland

<https://www.hpsc.ie/a-z/respiratory/coronavirus/novelcoronavirus/casesinireland/epidemiologyofcovid-19inireland/july2020/>

Japan

<https://stopcovid19.metro.tokyo.lg.jp/en/>

Korea

[http://ncov.mohw.go.kr/en/tcmBoardList.do?brdId=12&brdGubun=125&dataGubun=&ncvContSeq=&contSeq=&board\\_id=&gubun=](http://ncov.mohw.go.kr/en/tcmBoardList.do?brdId=12&brdGubun=125&dataGubun=&ncvContSeq=&contSeq=&board_id=&gubun=)

Malaysia

<http://covid-19.moh.gov.my/>

Nigeria

<https://ncdc.gov.ng/diseases/sitreps/?cat=14&name=An%20update%20of%20COVID-19%20outbreak%20in%20Nigeria>

Peru

[https://www.datosabiertos.gob.pe/group/datos-abiertos-de-covid-19?sort\\_by=changed&f%5B0%5D=field\\_tags%3A913&f%5B1%5D=field\\_tags%3A489](https://www.datosabiertos.gob.pe/group/datos-abiertos-de-covid-19?sort_by=changed&f%5B0%5D=field_tags%3A913&f%5B1%5D=field_tags%3A489)

Pakistan

<https://covid.gov.pk/>

Russia

Xinhuanet Moscow Covid Case reports (e.g., [http://www.xinhuanet.com/english/2020-11/06/c\\_139496392.htm](http://www.xinhuanet.com/english/2020-11/06/c_139496392.htm)).

Search terms: Xinhuanet Moscow Covid Cases [Date]



Spain

<https://cneccovid.isciii.es/covid19/#distribuci%C3%B3n-geogr%C3%A1fica>

Sweden

<https://experience.arcgis.com/experience/19fc7e3f61ec4e86af178fe2275029c5>

Switzerland

<https://www.corona-data.ch/>

United Kingdom (including Scotland and Jersey)

<https://coronavirus.data.gov.uk/cases> (England)

<https://www.gov.je/Health/Coronavirus/Pages/CoronavirusCases.aspx> (Jersey)

<https://www.gov.scot/publications/coronavirus-covid-19-trends-in-daily-data/> (Scotland)

United States of America

<https://www.kingcounty.gov/depts/health/covid-19/data/daily-summary.aspx> (Seattle)

<https://www.mass.gov/info-details/archive-of-covid-19-weekly-public-health-reports#may-2020-> (Chelsea, Massachusetts)

<https://www.mass.gov/doc/confirmed-covid-19-cases-in-ma-by-citytown-january-1-2020-may-13-2020-0/download> (Boston, Massachusetts)

<https://coronavirus.dc.gov/data> (Washington DC)

Appropriate case counts could not be obtained for Addis Ababa or Oromia, Ethiopia; Amman, Jordan; or Alzintan City, Libya.

## Supplementary Tables

### Supplementary Table 1. Characteristics of studies in the general population and primary seroprevalence estimates

| Article Author<br>(Study Organization)                                               | Sampling Dates<br>(YMD)     | Location                           | Geographic<br>Scope | Overall Risk<br>of Bias | Sample<br>Size | Age                                                                                                                                                             | Female<br>(%) | Sampling<br>method                | Sample Frame                             | Uncorrected<br>Seroprevalence<br>(95%<br>Confidence<br>Interval) | Test<br>Manufacturers  <br>Names   Isotypes                                                                                    | Test Sens, Spec<br>(Source)                                                                             | Corrected<br>Seroprevalence<br>(90% Credible<br>Interval) |
|--------------------------------------------------------------------------------------|-----------------------------|------------------------------------|---------------------|-------------------------|----------------|-----------------------------------------------------------------------------------------------------------------------------------------------------------------|---------------|-----------------------------------|------------------------------------------|------------------------------------------------------------------|--------------------------------------------------------------------------------------------------------------------------------|---------------------------------------------------------------------------------------------------------|-----------------------------------------------------------|
| <b>Central Europe, Eastern Europe, and Central Asia</b>                              |                             |                                    |                     |                         |                |                                                                                                                                                                 |               |                                   |                                          |                                                                  |                                                                                                                                |                                                                                                         |                                                           |
| <b>Hungary</b>                                                                       |                             |                                    |                     |                         |                |                                                                                                                                                                 |               |                                   |                                          |                                                                  |                                                                                                                                |                                                                                                         |                                                           |
| Merkely<br>(Semmelweis<br>University) <sup>30</sup>                                  | 2020-05-01 to<br>2020-05-16 |                                    | National            | Moderate                | 10474          | Mean 48.7<br>(SD 18)                                                                                                                                            | 53.6          | Stratified<br>probability         | Household<br>and<br>community<br>samples | 0.7% (0.5-<br>0.9%)                                              | Abbott   Abbott<br>Architect<br>SARS-CoV-2<br>IgG assay   IgG                                                                  | 69.9, 100.0<br>(FINDDx /<br>MUHC<br>independent<br>evaluation)                                          | 0.5% (0.0-<br>1.0%)                                       |
| <b>Russian Federation</b>                                                            |                             |                                    |                     |                         |                |                                                                                                                                                                 |               |                                   |                                          |                                                                  |                                                                                                                                |                                                                                                         |                                                           |
| Tickle (City of<br>Moscow) <sup>31</sup>                                             | 2020-06-05 to<br>2020-06-18 | Central Russia  <br>Moscow         | Local               | High                    | 90000          | NR                                                                                                                                                              | nan           | Simplified<br>probability         | Household<br>and<br>community<br>samples | 19.9% (19.6-<br>20.2%)                                           | Not reported  <br>Not Reported  <br>Not reported                                                                               | No data                                                                                                 | -                                                         |
| Kiselyov (Russian<br>National Council<br>for Combating<br>Coronavirus) <sup>32</sup> | 2020-06-10                  |                                    | National            | Moderate                | 650000         | NR                                                                                                                                                              | nan           | Unclear                           | Household<br>and<br>community<br>samples | 14.0% (13.9-<br>14.1%)                                           | Invitro   Not<br>Reported   Not<br>reported                                                                                    | 95.0, 98.0<br>(Test<br>developer /<br>manufacturer<br>evaluation)                                       | 12.0% (8.4-<br>15.5%)                                     |
| <b>High-income</b>                                                                   |                             |                                    |                     |                         |                |                                                                                                                                                                 |               |                                   |                                          |                                                                  |                                                                                                                                |                                                                                                         |                                                           |
| <b>Austria</b>                                                                       |                             |                                    |                     |                         |                |                                                                                                                                                                 |               |                                   |                                          |                                                                  |                                                                                                                                |                                                                                                         |                                                           |
| Knabl ( Medical<br>University of<br>Innsbruck ) <sup>33</sup>                        | 2020-04-21 to<br>2020-04-27 | Tyrol                              | Local               | Moderate                | 1473           | Mean 40.3<br>(Male); 40.9<br>(Female);<br>10.2<br>(Children);<br>45.8 (Adults)<br>(SD 19.5<br>(Male); 20.1<br>(Female); 4.9<br>(Children);<br>16.5<br>(Adults)) | 51.5          | Entire<br>sample                  | Household<br>and<br>community<br>samples | 42.4% (39.9-<br>45.0%)                                           | Abbott;<br>EUROIMMUN<br>  Abbott SARS-<br>CoV-2 IgG<br>immunoassay;<br>Euroimmun<br>Anti-SARS-<br>CoV-2 IgG IgA<br>ELISA   IgG | 75.6, 97.6<br>(Used Bastos<br>SR/MA data;<br>no sens,<br>spec, or<br>author<br>adjustment<br>available) | 54.6% (51.1-<br>58.0%)                                    |
| <b>Belgium</b>                                                                       |                             |                                    |                     |                         |                |                                                                                                                                                                 |               |                                   |                                          |                                                                  |                                                                                                                                |                                                                                                         |                                                           |
| Herzog (University<br>of Antwerp) <sup>34</sup>                                      | 2020-06-29 to<br>2020-07-04 | Wallonia,<br>Brussels,<br>Flanders | National            | Moderate                | 3023           | 0-10 (n=110);<br>10-20<br>(n=413); 20-                                                                                                                          | 51.3          | Stratified<br>non-<br>probability | Household<br>and                         | 4.5% (3.8-<br>5.3%)                                              | EUROIMMUN<br>  Euroimmun<br>Anti-SARS-                                                                                         | 76.9, 97.0<br>(FINDDx /<br>MUHC                                                                         | 2.2% (0.0-<br>4.1%)                                       |

| Article Author<br>(Study Organization)          | Sampling Dates<br>(YMD)     | Location                           | Geographic<br>Scope | Overall Risk<br>of Bias | Sample<br>Size | Age                                                                                                                                                                                          | Female<br>(%) | Sampling<br>method                | Sample Frame                             | Uncorrected<br>Seroprevalence<br>(95%<br>Confidence<br>Interval) | Test<br>Manufacturers  <br>Names   Isotypes                        | Test Sens, Spec<br>(Source)                                   | Corrected<br>Seroprevalence<br>(90% Credible<br>Interval) |
|-------------------------------------------------|-----------------------------|------------------------------------|---------------------|-------------------------|----------------|----------------------------------------------------------------------------------------------------------------------------------------------------------------------------------------------|---------------|-----------------------------------|------------------------------------------|------------------------------------------------------------------|--------------------------------------------------------------------|---------------------------------------------------------------|-----------------------------------------------------------|
|                                                 |                             |                                    |                     |                         |                | 30 (n=394);<br>30-40<br>(n=396); 40-<br>50 (n=403);<br>50-60<br>(n=400); 60-<br>70 (n=403);<br>70-80<br>(n=204), 80-<br>90 (n=160);<br>>90 (n=140)                                           |               |                                   | community<br>samples                     |                                                                  | CoV-2 ELISA<br>IgG   IgG                                           | independent<br>evaluation)                                    |                                                           |
| Herzog (University<br>of Antwerp) <sup>34</sup> | 2020-06-08 to<br>2020-06-13 | Wallonia,<br>Brussels,<br>Flanders | National            | Moderate                | 2960           | 0-10 (n=124);<br>10-20<br>(n=375); 20-<br>30 (n=383);<br>30-40<br>(n=395); 40-<br>50 (n=394);<br>50-60<br>(n=393); 60-<br>70 (n=399);<br>70-80<br>(n=201), 80-<br>90 (n=166);<br>>90 (n=130) | 51.9          | Stratified<br>non-<br>probability | Household<br>and<br>community<br>samples | 5.5% (4.7-<br>6.4%)                                              | EUROIMMUN<br>  Euroimmun<br>Anti-SARS-<br>CoV-2 ELISA<br>IgG   IgG | 76.9, 97.0<br>(FINDDx /<br>MUHC<br>independent<br>evaluation) | 2.8% (0.0-<br>5.2%)                                       |
| Herzog (University<br>of Antwerp) <sup>34</sup> | 2020-05-18 to<br>2020-05-25 | Wallonia,<br>Brussels,<br>Flanders | National            | Moderate                | 3242           | 0-10 (n=174);<br>10-20<br>(n=431); 20-<br>30 (n=414);<br>30-40<br>(n=424); 40-<br>50 (n=411);<br>50-60<br>(n=419); 60-<br>70 (n=417);<br>70-80<br>(n=236), 80-<br>90 (n=163);<br>>90 (n=153) | 51.0          | Stratified<br>non-<br>probability | Household<br>and<br>community<br>samples | 6.9% (6.1-<br>7.8%)                                              | EUROIMMUN<br>  Euroimmun<br>Anti-SARS-<br>CoV-2 ELISA<br>IgG   IgG | 76.9, 97.0<br>(FINDDx /<br>MUHC<br>independent<br>evaluation) | 4.1% (0.2-<br>7.1%)                                       |
| Herzog (University<br>of Antwerp) <sup>34</sup> | 2020-04-20 to<br>2020-04-26 | Wallonia,<br>Brussels,<br>Flanders | National            | Moderate                | 3397           | 0-10 (n=85);<br>10-20<br>(n=442); 20-<br>30 (n=375);<br>30-40<br>(n=407); 40-<br>50 (n=406);<br>50-60<br>(n=430); 60-<br>70 (n=426);<br>70-80                                                | 52.9          | Stratified<br>non-<br>probability | Household<br>and<br>community<br>samples | 6.0% (5.2-<br>6.9%)                                              | EUROIMMUN<br>  Euroimmun<br>Anti-SARS-<br>CoV-2 ELISA<br>IgG   IgG | 76.9, 97.0<br>(FINDDx /<br>MUHC<br>independent<br>evaluation) | 3.2% (0.0-<br>5.8%)                                       |

| Article Author (Study Organization)          | Sampling Dates (YMD)     | Location                                                                                                                                | Geographic Scope | Overall Risk of Bias | Sample Size | Age                                                                                                                                              | Female (%) | Sampling method            | Sample Frame                    | Uncorrected Seroprevalence (95% Confidence Interval) | Test Manufacturers   Names   Isotypes                                                                                                | Test Sens, Spec (Source)                               | Corrected Seroprevalence (90% Credible Interval) |
|----------------------------------------------|--------------------------|-----------------------------------------------------------------------------------------------------------------------------------------|------------------|----------------------|-------------|--------------------------------------------------------------------------------------------------------------------------------------------------|------------|----------------------------|---------------------------------|------------------------------------------------------|--------------------------------------------------------------------------------------------------------------------------------------|--------------------------------------------------------|--------------------------------------------------|
|                                              |                          |                                                                                                                                         |                  |                      |             | (n=316), 80-90 (n=315); >90 (n=195)                                                                                                              |            |                            |                                 |                                                      |                                                                                                                                      |                                                        |                                                  |
| Herzog (University of Antwerp) <sup>34</sup> | 2020-03-30 to 2020-04-05 | Wallonia, Brussels, Flanders                                                                                                            | National         | Moderate             | 3910        | 0-10 (n=36); 10-20 (n=294); 20-30 (n=436); 30-40 (n=461); 40-50 (n=468); 50-60 (n=498); 60-70 (n=507); 70-80 (n=506), 80-90 (n=493); >90 (n=211) | 54.0       | Stratified non-probability | Household and community samples | 2.9% (2.4-3.5%)                                      | EUROIMMUN   Euroimmun Anti-SARS-CoV-2 ELISA IgG   IgG                                                                                | 76.9, 97.0 (FINDDx / MUHC independent evaluation)      | 1.1% (0.0-2.3%)                                  |
| <b>Canada</b>                                |                          |                                                                                                                                         |                  |                      |             |                                                                                                                                                  |            |                            |                                 |                                                      |                                                                                                                                      |                                                        |                                                  |
| Héma-Québec <sup>35 36</sup>                 | 2020-05-25 to 2020-07-09 | Quebec                                                                                                                                  | Regional         | Unclear              | 7691        | NR                                                                                                                                               | nan        | Stratified probability     | Blood donors                    | 2.2% (1.9-2.6%)                                      | Not reported   Not Reported   Not reported                                                                                           | No data                                                | -                                                |
| Public Health Ontario <sup>37 38</sup>       | 2020-06-05 to 2020-06-30 | Ontario                                                                                                                                 | Regional         | Moderate             | 7014        | 0-19 (n=978); 20-59 (n=3996); >=60 (n=2040)                                                                                                      | 51.2       | Stratified probability     | Residual sera                   | 1.1% (0.9-1.4%)                                      | Abbott; Ortho-Clinical Diagnostics   Abbott Architect SARS-CoV-2 IgG assay; Ortho-Diagnostics VITROS anti-SARS-CoV-2 IgG assay   IgG | 90.4, 100.0 (Test developer / manufacturer evaluation) | 0.8% (0.0-1.3%)                                  |
| Canadian Blood Services <sup>39</sup>        | 2020-05-09 to 2020-06-18 | Ontario, British Columbia, Alberta, Saskatchewan, Manitoba, New Brunswick, Nova Scotia, Prince Edward Island, Newfoundland and Labrador | National         | Moderate             | 37737       | 17-25 (n=3581); 25-39 (n=10781); 40-59 (14147); 60+(n=9228)                                                                                      | 46.9       | Sequential                 | Blood donors                    | 0.7% (0.6-0.8%)                                      | Abbott   Abbott Architect SARS-CoV-2 IgG assay   IgG                                                                                 | 41.2, 100.0 (FINDDx / MUHC independent evaluation)     | 1.1% (0.1-1.8%)                                  |

| Article Author (Study Organization)                                    | Sampling Dates (YMD)     | Location                                  | Geographic Scope | Overall Risk of Bias | Sample Size | Age                                       | Female (%) | Sampling method        | Sample Frame  | Uncorrected Seroprevalence (95% Confidence Interval) | Test Manufacturers   Names   Isotypes                                                                                                | Test Sens, Spec (Source)                               | Corrected Seroprevalence (90% Credible Interval) |
|------------------------------------------------------------------------|--------------------------|-------------------------------------------|------------------|----------------------|-------------|-------------------------------------------|------------|------------------------|---------------|------------------------------------------------------|--------------------------------------------------------------------------------------------------------------------------------------|--------------------------------------------------------|--------------------------------------------------|
| Public Health Ontario <sup>37, 38</sup>                                | 2020-05-26 to 2020-05-31 | Ontario                                   | Regional         | Moderate             | 1061        | 0-19 (n=218); 20-59 (n=521); >=60 (n=322) | 50.5       | Stratified probability | Residual sera | 1.4% (0.8-2.3%)                                      | Abbott; Ortho-Clinical Diagnostics   Abbott Architect SARS-CoV-2 IgG assay; Ortho-Diagnostics VITROS anti-SARS-CoV-2 IgG assay   IgG | 90.4, 100.0 (Test developer / manufacturer evaluation) | 1.0% (0.0-1.8%)                                  |
| Skowronski (British Columbia Centre for Disease Control) <sup>40</sup> | 2020-05-15 to 2020-05-27 | British Columbia   Greater Vancouver Area | Regional         | Moderate             | 889         | Median 45 (Range <10-80+)                 | 50.3       | Stratified probability | Residual sera | 0.8% (0.3-1.6%)                                      | Ortho-Clinical Diagnostics   VITROS anti-SARS-CoV-2 total antibody   IgA; IgG; IgM                                                   | 85.0, 99.4 (FINDDx / MUHC independent evaluation)      | 0.5% (0.0-1.0%)                                  |
| Public Health Ontario <sup>37, 38</sup>                                | 2020-03-27 to 2020-04-30 | Ontario                                   | Regional         | Moderate             | 827         | 0-19 (n=182); 20-59 (n=503); >=60 (n=142) | 59.3       | Stratified probability | Residual sera | 0.4% (0.1-1.1%)                                      | Abbott; Ortho-Clinical Diagnostics   Abbott Architect SARS-CoV-2 IgG assay; Ortho-Diagnostics VITROS anti-SARS-CoV-2 IgG assay   IgG | 90.4, 100.0 (Test developer / manufacturer evaluation) | 0.3% (0.0-0.6%)                                  |
| Skowronski (British Columbia Centre for Disease Control) <sup>40</sup> | 2020-03-05 to 2020-03-13 | British Columbia   Greater Vancouver Area | Regional         | Moderate             | 870         | Median 45 (Range <10-80+)                 | 51.0       | Stratified probability | Residual sera | 0.8% (0.3-1.6%)                                      | Ortho-Clinical Diagnostics   VITROS anti-SARS-CoV-2 total antibody   IgA; IgG; IgM                                                   | 85.0, 99.4 (FINDDx / MUHC independent evaluation)      | 0.5% (0.0-0.9%)                                  |
| <b>Denmark</b>                                                         |                          |                                           |                  |                      |             |                                           |            |                        |               |                                                      |                                                                                                                                      |                                                        |                                                  |
| Jespersen (Aarhus University Hospital) <sup>41</sup>                   | 2020-06-17 to 2020-06-30 | Central Denmark Region                    | Regional         | High                 | 180         | NR                                        | nan        | Unclear                | Blood donors  | 1.2% (0.2-4.1%)                                      | Wantai Biological Pharmacy Enterprise   Wantai SARS CoV-2 Total Antibody ELISA   Total Antibody                                      | 96.7, 99.5 (Used author-adjusted estimate)             | 1.2% (0.4-3.2%)                                  |

| Article Author (Study Organization)                                                   | Sampling Dates (YMD)     | Location                  | Geographic Scope | Overall Risk of Bias | Sample Size | Age                                                                                         | Female (%) | Sampling method | Sample Frame                    | Uncorrected Seroprevalence (95% Confidence Interval) | Test Manufacturers   Names   Isotypes                                                             | Test Sens, Spec (Source)                               | Corrected Seroprevalence (90% Credible Interval) |
|---------------------------------------------------------------------------------------|--------------------------|---------------------------|------------------|----------------------|-------------|---------------------------------------------------------------------------------------------|------------|-----------------|---------------------------------|------------------------------------------------------|---------------------------------------------------------------------------------------------------|--------------------------------------------------------|--------------------------------------------------|
| Jespersen (Aarhus University Hospital) <sup>41</sup>                                  | 2020-06-17 to 2020-06-30 | Central Denmark Region    | Regional         | High                 | 180         | NR                                                                                          | nan        | Unclear         | Blood donors                    | 0.6% (0.0-3.1%)                                      | Wantai Biological Pharmacy Enterprise   Wantai SARS CoV-2 Total Antibody ELISA   Total Antibody   | 96.7, 99.5 (Used author-adjusted estimate)             | 0.6% (0.1-2.2%)                                  |
| Erikstrup (Copenhagen University Hospital) <sup>42</sup>                              | 2020-04-06 to 2020-05-03 |                           | National         | Moderate             | 20640       | 17-69 (n=20640)                                                                             | 50.5       | Entire sample   | Blood donors                    | 2.0% (1.8-2.2%)                                      | Livzon Diagnostics   2019-nCoV IgG/IgM Antibody Detection Kit   IgG; IgM                          | 68.6, 63.6 (FINDDx / MUHC independent evaluation)      | 0.4% (0.0-0.9%)                                  |
| Petersen (University of the Faroe Islands) <sup>43</sup>                              | 2020-04-27 to 2020-05-01 | Faroe Islands             | Regional         | Low                  | 1075        | Mean 42.1 (SD 23.1)                                                                         | 50.0       | Randomized      | Household and community samples | 0.6% (0.2-1.3%)                                      | Beijing Wantai Biological Pharmacy Enterprise   Wantai SARS CoV-2 Total Antibody ELISA   IgG; IgM | 95.7, 98.7 (FINDDx / MUHC independent evaluation)      | 0.2% (0.0-0.5%)                                  |
| Iversen (University of Copenhagen) <sup>44</sup>                                      | 2020-04-15 to 2020-04-22 | Capital Region of Denmark | Regional         | High                 | 4672        | NR                                                                                          | nan        | Sequential      | Blood donors                    | 3.0% (2.6-3.6%)                                      | Livzon Diagnostics   Not Reported   IgM; IgG                                                      | 73.4, 99.9 (Used author-adjusted estimate)             | 3.0% (2.6-3.5%)                                  |
| <b>France</b>                                                                         |                          |                           |                  |                      |             |                                                                                             |            |                 |                                 |                                                      |                                                                                                   |                                                        |                                                  |
| Cohen (Association Clinique et Thérapeutique Infantile du Val-de-Marne) <sup>45</sup> | 2020-04-14 to 2020-05-12 | Paris   Paris             | Local            | High                 | 605         | Mean 4.9 (SD 3.9)                                                                           | 46.8       | Sequential      | Residual sera                   | 10.7% (8.4-13.4%)                                    | Biosynex   Biosynex COVID-19 BSS test   IgG; IgM                                                  | 91.8, 99.2 (Test developer / manufacturer evaluation)  | 9.8% (5.9-13.9%)                                 |
| Fontanet (Institut Pasteur) <sup>46</sup>                                             | 2020-04-28 to 2020-04-30 | Oise   Crepy-en-Valois    | Local            | Moderate             | 1340        | Median NR (Pupils); 40 (parents); 47.5 (teachers); 47.5 (non-teaching staff) (IQR TR: 6-11) | 57.4       | Convenience     | Household and community samples | 10.4% (8.8-12.2%)                                    | Institut Pasteur   S-Flow assay   Not reported                                                    | 99.4, 100.0 (Test developer / manufacturer evaluation) | 9.9% (8.3-11.7%)                                 |

| Article Author (Study Organization)                   | Sampling Dates (YMD)     | Location                                             | Geographic Scope | Overall Risk of Bias | Sample Size | Age                                                                     | Female (%) | Sampling method | Sample Frame                    | Uncorrected Seroprevalence (95% Confidence Interval) | Test Manufacturers   Names   Isotypes                                                                                                                                                                                                           | Test Sens, Spec (Source)                                                           | Corrected Seroprevalence (90% Credible Interval) |
|-------------------------------------------------------|--------------------------|------------------------------------------------------|------------------|----------------------|-------------|-------------------------------------------------------------------------|------------|-----------------|---------------------------------|------------------------------------------------------|-------------------------------------------------------------------------------------------------------------------------------------------------------------------------------------------------------------------------------------------------|------------------------------------------------------------------------------------|--------------------------------------------------|
|                                                       |                          |                                                      |                  |                      |             | Pupils; 37-44 (Parents); 40-51 (Teachers); 32-54 (non-teaching staff))  |            |                 |                                 |                                                      |                                                                                                                                                                                                                                                 |                                                                                    |                                                  |
| Gallian (Unite des Virus Emergents) <sup>47</sup>     | 2020-03-25 to 2020-04-07 | Bouches du Rhone, Haut Rhin, Oise, Seine Saint Denis | National         | High                 | 998         | Median 41 (NR)                                                          | 49.0       | Sequential      | Blood donors                    | 2.7% (1.8-3.9%)                                      | Author-designed   N/A - Author-designed   Not reported                                                                                                                                                                                          | No data                                                                            | -                                                |
| <b>Germany</b>                                        |                          |                                                      |                  |                      |             |                                                                         |            |                 |                                 |                                                      |                                                                                                                                                                                                                                                 |                                                                                    |                                                  |
| Fischer (Heart and Diabetes Center NRW) <sup>48</sup> | 2020-03-09 to 2020-06-03 | North Rhine-Westphalia, Lower Saxony, Hesse          | Regional         | High                 | 3186        | NR                                                                      | 70.8       | Sequential      | Residual sera                   | 0.9% (0.6-1.3%)                                      | Abbott; EUROIMMUN ; DiaSorin   Abbott Architect SARS-CoV-2 IgG assay; Euroimmun Anti-SARS-CoV-2 ELISA IgG; LIAISON SARS-CoV-2 S1/S2 IgG   IgG                                                                                                   | 75.6, 97.6 (Used Bastos SR/MA data; no sens, spec, or author adjustment available) | 0.1% (0.0-0.3%)                                  |
| Weis (Jena University Hospital) <sup>49</sup>         | 2020-05-12 to 2020-05-22 | Thuringia   Ilm-Kreis                                | Local            | Moderate             | 620         | Mean 58.1 (adults); 9.6 (children) (SD 16.5 (adults); 4.38 (children) ) | 51.3       | Entire sample   | Household and community samples | 8.4% (6.3-10.9%)                                     | Epitope Diagnostics; EUROIMMUN ; DiaSorin; Snibe Diagnostic; Abbott; Roche   EDI Novel Coronavirus SARS-CoV-2 IgG ELISA kit; SARS-CoV-2 IgG ELISA kit; SARS-CoV-2 S1/S2 IgG CLIA kit; 2019-nCoV IgG kit; SARS-CoV-2 IgG CMIA kit; Elecsys Anti- | 97.8, 97.8 (Used Bastos SR/MA data; no sens, spec, or author adjustment available) | 6.6% (4.6-8.5%)                                  |

| Article Author (Study Organization)                                   | Sampling Dates (YMD)     | Location                                                                                                    | Geographic Scope | Overall Risk of Bias | Sample Size | Age                                                          | Female (%) | Sampling method        | Sample Frame                    | Uncorrected Seroprevalence (95% Confidence Interval) | Test Manufacturers   Names   Isotypes                          | Test Sens, Spec (Source)                           | Corrected Seroprevalence (90% Credible Interval) |
|-----------------------------------------------------------------------|--------------------------|-------------------------------------------------------------------------------------------------------------|------------------|----------------------|-------------|--------------------------------------------------------------|------------|------------------------|---------------------------------|------------------------------------------------------|----------------------------------------------------------------|----------------------------------------------------|--------------------------------------------------|
|                                                                       |                          |                                                                                                             |                  |                      |             |                                                              |            |                        |                                 |                                                      | SARS-CoV-2 kit   IgG                                           |                                                    |                                                  |
| Reisinger (Universitätsmedizin Rostock) <sup>50</sup>                 | 2020-04-20 to 2020-04-22 | Mecklenburg-Westpomerania   Rostock                                                                         | Sublocal         | High                 | 401         | Mean 36.9 (NR)                                               | 100.0      | Self-referral          | Household and community samples | 3.0% (1.6-5.2%)                                      | EUROIMMUN   Euroimmun Anti-SARS-CoV-2 IgG IgA ELISA   IgG; IgA | 87.4, 82.0 (FINDDx / MUHC independent evaluation)  | 0.6% (0.0-1.3%)                                  |
| Streeck (University of Bonn) <sup>51</sup>                            | 2020-03-31 to 2020-04-06 | North Rhine-Westphalia   Gangelt                                                                            | Local            | Low                  | 919         | Median 53 (Range 1-90)                                       | 50.8       | Simplified probability | Household and community samples | 13.6% (11.4-16.0%)                                   | EUROIMMUN   Euroimmun Anti-SARS-CoV-2 ELISA IgG   IgG          | 86.7, 85.0 (FINDDx / MUHC independent evaluation)  | 3.1% (0.0-6.4%)                                  |
| <b>Greece</b>                                                         |                          |                                                                                                             |                  |                      |             |                                                              |            |                        |                                 |                                                      |                                                                |                                                    |                                                  |
| Bogogiannidou (University of Thessaly) <sup>52</sup>                  | 2020-03-01 to 2020-04-30 | Central Macedonia, Attica, Peloponnese, Thessaly, Western Macedonia, Central Greece, Western Greece, Epirus | National         | Moderate             | 6586        | 0-29 (n=1464); 30-49 (n=2066); 50-69 (n=1762); >=70 (n=1294) | 55.0       | Convenience            | Residual sera                   | 0.4% (0.2-0.5%)                                      | Abbott   Abbott Architect SARS-CoV-2 IgG assay   IgG           | 41.2, 100.0 (FINDDx / MUHC independent evaluation) | 0.5% (0.0-0.9%)                                  |
| <b>Ireland</b>                                                        |                          |                                                                                                             |                  |                      |             |                                                              |            |                        |                                 |                                                      |                                                                |                                                    |                                                  |
| Igoe (HSE Health Protection Surveillance Centre (HPSC)) <sup>53</sup> | 2020-06-22 to 2020-07-16 | Connaught, Leinster                                                                                         | National         | Moderate             | 1733        | NR                                                           | nan        | Randomized             | Household and community samples | 1.7% (1.1-2.4%)                                      | Abbott   Abbott Architect SARS-CoV-2 IgG assay   IgG           | 41.2, 100.0 (FINDDx / MUHC independent evaluation) | 3.1% (0.6-5.1%)                                  |
| <b>Israel</b>                                                         |                          |                                                                                                             |                  |                      |             |                                                              |            |                        |                                 |                                                      |                                                                |                                                    |                                                  |
| Bachner (Israeli Pandemic Task Force) <sup>54,55</sup>                | Until 2020-06-02         | Israel                                                                                                      | National         | High                 | 1700        | NR                                                           | nan        | Stratified probability | Household and community samples | 2.5% (1.8-3.4%)                                      | Not reported   Not Reported   IgG                              | No data                                            | -                                                |
| <b>Italy</b>                                                          |                          |                                                                                                             |                  |                      |             |                                                              |            |                        |                                 |                                                      |                                                                |                                                    |                                                  |
| Pagani (Università degli Studi di Milano) <sup>56</sup>               | 2020-05-18 to 2020-06-07 | Lombardy                                                                                                    | Local            | Moderate             | 509         | 0-19 (n=61); 20-39 (n=111); 40-                              | 48.9       | Stratified probability | Household and                   | 22.6% (19.0-26.5%)                                   | Abbott   Abbott SARS-CoV-2 IgG                                 | 69.9, 100.0 (FINDDx / MUHC)                        | 32.0% (24.7-38.8%)                               |



| Article Author (Study Organization)                                   | Sampling Dates (YMD)     | Location           | Geographic Scope | Overall Risk of Bias | Sample Size | Age                                                                                                                         | Female (%) | Sampling method        | Sample Frame                    | Uncorrected Seroprevalence (95% Confidence Interval) | Test Manufacturers   Names   Isotypes                                                      | Test Sens, Spec (Source)                                                           | Corrected Seroprevalence (90% Credible Interval) |
|-----------------------------------------------------------------------|--------------------------|--------------------|------------------|----------------------|-------------|-----------------------------------------------------------------------------------------------------------------------------|------------|------------------------|---------------------------------|------------------------------------------------------|--------------------------------------------------------------------------------------------|------------------------------------------------------------------------------------|--------------------------------------------------|
|                                                                       |                          |                    |                  |                      |             | 59 (n=182);<br>>=60 (n=155)                                                                                                 |            |                        | community samples               |                                                      | immunoassay   IgG                                                                          | independent evaluation)                                                            |                                                  |
| Amante (Bergamo Health Agency) <sup>57</sup>                          | 2020-04-23 to 2020-06-03 | Lombardy   Bergamo | Regional         | Moderate             | 9965        | NR                                                                                                                          | nan        | Simplified probability | Household and community samples | 57.0% (56.0-58.0%)                                   | Not reported   Not Reported   Not reported                                                 | No data                                                                            | -                                                |
| Fiore (University of Foggia) <sup>58</sup>                            | 2020-05-01 to 2020-05-31 | Apulia   Foggia    | Local            | High                 | 904         | 18 to 25 (n=112, 12.4%), 26 to 35 (n=195, 21.6%), 36 to 45 (n=202, 22.3%), 46 to 55 (n=149, 27.2%), 56 to 65 (n=149, 16.5%) | 26.4       | Convenience            | Blood donors                    | 1.0% (0.5-1.9%)                                      | New Industries Biomedical Engineering Co., Ltd   Not Reported   IgG; IgM                   | 97.8, 97.8 (Used Bastos SR/MA data; no sens, spec, or author adjustment available) | 0.2% (0.0-0.4%)                                  |
| Landro (ATS Bergamo) <sup>59</sup>                                    | 2020-04-23 to 2020-04-28 | Lombardy   Bergamo | Local            | Unclear              | 750         | NR                                                                                                                          | nan        | Unclear                | Household and community samples | 61.0% (57.4-64.5%)                                   | Not reported   Not Reported   Not reported                                                 | No data                                                                            | -                                                |
| Valenti (Fondazione IRCCS Ca' Granda Ospedale Maggiore) <sup>60</sup> | 2020-02-24 to 2020-04-08 | Lombardy   Milan   | Local            | Moderate             | 789         | Mean 42.6 (SD 13.4)                                                                                                         | 35.0       | Simplified probability | Blood donors                    | 5.1% (3.7-6.9%)                                      | Prima Lab   PRIMA COVID-19 IgG/IgM Rapid Test   IgG; IgM                                   | 79.1, 85.4 (FINDDx / MUHC independent evaluation)                                  | 0.9% (0.0-2.0%)                                  |
| Percivalle (IRCCS Policlinico San Matteo) <sup>61</sup>               | 2020-03-18 to 2020-04-06 | Lombardy   Lodi    | Local            | High                 | 390         | Median 46 (Range 19-70)                                                                                                     | 30.3       | Sequential             | Blood donors                    | 23.0% (18.9-27.5%)                                   | Author-designed   N/A - Author-designed   Not reported                                     | 95.0, 100.0 (Test developer / manufacturer evaluation)                             | 22.0% (16.0-28.6%)                               |
| Milani (University of Milan) <sup>62</sup>                            | 2020-03-30 to 2020-03-31 | Lombardy   Milan   | Local            | High                 | 197         | NR                                                                                                                          | nan        | Self-referral          | Household and community samples | 5.6% (2.8-9.8%)                                      | Beijing Wantai Biological Pharmacy Enterprise   Wantai SARS-CoV-2 Ab ELISA   IgG; IgM; IgA | 93.1, 99.1 (FINDDx / MUHC independent evaluation)                                  | 5.1% (1.9-8.4%)                                  |
| <b>Japan</b>                                                          |                          |                    |                  |                      |             |                                                                                                                             |            |                        |                                 |                                                      |                                                                                            |                                                                                    |                                                  |

| Article Author (Study Organization)                                        | Sampling Dates (YMD)     | Location                                                 | Geographic Scope | Overall Risk of Bias | Sample Size | Age                                                                           | Female (%) | Sampling method            | Sample Frame                    | Uncorrected Seroprevalence (95% Confidence Interval) | Test Manufacturers   Names   Isotypes                                                          | Test Sens, Spec (Source)                               | Corrected Seroprevalence (90% Credible Interval) |
|----------------------------------------------------------------------------|--------------------------|----------------------------------------------------------|------------------|----------------------|-------------|-------------------------------------------------------------------------------|------------|----------------------------|---------------------------------|------------------------------------------------------|------------------------------------------------------------------------------------------------|--------------------------------------------------------|--------------------------------------------------|
| Nawa (Tokyo Medical and Dental University) <sup>63</sup>                   | 2020-06-14 to 2020-07-05 | Kantō region   Utsunomiya City                           | Local            | Moderate             | 742         | <10 (n=56); 10-17 (n=42); 18-65 (n=463); >65 (n=181)                          | 52.6       | Simplified probability     | Household and community samples | 1.2% (0.6-2.3%)                                      | Shenzhen YHLO Biotech Co   Not Reported   IgG                                                  | 73.1, 100.0 (FINDDx / MUHC independent evaluation)     | 1.3% (0.0-2.4%)                                  |
| Takita (Navitas Clinic Tachikawa) <sup>64,65</sup>                         | 2020-04-20 to 2020-05-20 | Kanto, Chūbu   Tokyo, Kangawa, Saitama, Chiba, Yamanashi | Local            | High                 | 1071        | <=17 (n=13); 18-34 (n=134); 35-54 (n=653); =>55 (n=271)                       | 46.2       | Self-referral              | Household and community samples | 3.8% (2.8-5.2%)                                      | Kurabo Industries   SARS-CoV-2 Antibody Testing Kit IgG (RC - NC002)   IgG                     | 76.4, 100.0 (Test developer / manufacturer evaluation) | 4.2% (1.6-6.8%)                                  |
| <b>Luxembourg</b>                                                          |                          |                                                          |                  |                      |             |                                                                               |            |                            |                                 |                                                      |                                                                                                |                                                        |                                                  |
| Snoeck (Luxembourg Institute of Health) <sup>66</sup>                      | 2020-04-15 to 2020-05-05 |                                                          | National         | Moderate             | 1820        | Mean 47 (SD 15)                                                               | 52.1       | Stratified probability     | Household and community samples | 2.1% (1.5-2.9%)                                      | EUROIMMUN   Euroimmun Anti-SARS-CoV-2 ELISA IgG   IgG                                          | 76.9, 97.0 (FINDDx / MUHC independent evaluation)      | 0.8% (0.0-1.7%)                                  |
| <b>Netherlands</b>                                                         |                          |                                                          |                  |                      |             |                                                                               |            |                            |                                 |                                                      |                                                                                                |                                                        |                                                  |
| Slot (Amsterdam UMC) <sup>67</sup>                                         | 2020-04-01 to 2020-04-15 |                                                          | National         | Moderate             | 7361        | 18-30 (n=1251); 31-40 (n=882); 41-50 (n=1354); 51-60 (n=2132); 60-72 (n=1742) | nan        | Sequential                 | Blood donors                    | 3.1% (2.7-3.5%)                                      | Wantai Biological Pharmacy Enterprise   Wantai SARS CoV-2 Total Antibody ELISA   IgG; IgA; IgM | 72.7, 97.0 (FINDDx / MUHC independent evaluation)      | 1.4% (0.0-2.8%)                                  |
| <b>Norway</b>                                                              |                          |                                                          |                  |                      |             |                                                                               |            |                            |                                 |                                                      |                                                                                                |                                                        |                                                  |
| Tunheim (Norwegian Institute of Public Health) <sup>68</sup>               | 2020-04-20 to 2020-05-17 |                                                          | National         | Moderate             | 900         | 0-4 (n=41); 5-14 (n=115); 15-24 (n=166); 25-59 (n=372); ≥60 (n=206)           | 56.6       | Sequential                 | Residual sera                   | 1.1% (0.5-2.0%)                                      | Department of Immunology, Oslo University Hospital   N/A - Author-designed   IgG               | 86.0, 100.0 (Test developer / manufacturer evaluation) | 0.9% (0.0-1.6%)                                  |
| <b>Portugal</b>                                                            |                          |                                                          |                  |                      |             |                                                                               |            |                            |                                 |                                                      |                                                                                                |                                                        |                                                  |
| Rodrigues (Instituto Nacional de Saúde Doutor Ricardo Jorge) <sup>69</sup> | 2020-05-21 to 2020-07-08 |                                                          | National         | Moderate             | 2301        | 1-9 (n=404); 10-19 (n=377); 20-39 (n=377);                                    | 54.1       | Stratified non-probability | Household and community samples | 1.9% (1.4-2.5%)                                      | EUROIMMUN   Euroimmun Anti-SARS-                                                               | 42.9, 98.0 (FINDDx / MUHC)                             | 1.7% (0.0-3.4%)                                  |

| Article Author (Study Organization)                                       | Sampling Dates (YMD)     | Location  | Geographic Scope | Overall Risk of Bias | Sample Size | Age                                                                                   | Female (%) | Sampling method        | Sample Frame                    | Uncorrected Seroprevalence (95% Confidence Interval) | Test Manufacturers   Names   Isotypes                | Test Sens, Spec (Source)                              | Corrected Seroprevalence (90% Credible Interval) |
|---------------------------------------------------------------------------|--------------------------|-----------|------------------|----------------------|-------------|---------------------------------------------------------------------------------------|------------|------------------------|---------------------------------|------------------------------------------------------|------------------------------------------------------|-------------------------------------------------------|--------------------------------------------------|
|                                                                           |                          |           |                  |                      |             | 40-59 (n=479); >=60 (n=664)                                                           |            |                        |                                 |                                                      | CoV-2 ELISA IgG   IgG                                | independent evaluation)                               |                                                  |
| <b>Republic of Korea</b>                                                  |                          |           |                  |                      |             |                                                                                       |            |                        |                                 |                                                      |                                                      |                                                       |                                                  |
| Ji-Ho (Korea Centers for Disease Control and Prevention) <sup>70,71</sup> | Until 2020-07-09         | Korea     | National         | Unclear              | 3055        | NR                                                                                    | nan        | Unclear                | Household and community samples | 0.0% (0.0-0.2%)                                      | Not reported   Not Reported   Not reported           | No data                                               | -                                                |
| Noh (Korea University) <sup>72</sup>                                      | 2020-05-25 to 2020-05-29 |           | Local            | High                 | 1500        | 0-19 (n=226); 20-29 (n=258); 30-39 (n=261); 40-49 (n=254); 50-59 (n=255); >60 (n=246) | 51.3       | Convenience            | Residual sera                   | 0.1% (0.0-0.4%)                                      | Roche elecsys   Elecsys Anti-SARS-CoV-2 kit   IgG    | 99.5, 99.8 (Test developer / manufacturer evaluation) | 0.1% (0.0-0.2%)                                  |
| <b>Singapore</b>                                                          |                          |           |                  |                      |             |                                                                                       |            |                        |                                 |                                                      |                                                      |                                                       |                                                  |
| Kurohi (Singapore National Centre for Infectious Diseases) <sup>73</sup>  | 2020-02-15 to 2020-04-15 | Singapore | Local            | Unclear              | 774         | NR                                                                                    | nan        | Unclear                | Household and community samples | 0.0% (0.0-0.5%)                                      | Not reported   Not Reported   Not reported           | No data                                               | -                                                |
| <b>Spain</b>                                                              |                          |           |                  |                      |             |                                                                                       |            |                        |                                 |                                                      |                                                      |                                                       |                                                  |
| Flores (Municipality of Torrejon de Ardoz) <sup>74</sup>                  | 2020-05-29 to 2020-06-03 |           | Local            | Moderate             | 104299      | >=1                                                                                   | nan        | Entire sample          | Household and community samples | 23.1% (22.8-23.3%)                                   | Not reported   Not Reported   IgG; IgM               | No data                                               | -                                                |
| Pollán (Institute of Health Carlos III) <sup>75</sup>                     | 2020-04-27 to 2020-05-11 |           | National         | Low                  | 51958       | 0-19 (n=11422); 20-34 (n=8469); 35-49 (n=14532); 50-64 (n=15094); >=65 (n=11558)      | 61.1       | Stratified probability | Household and community samples | 4.6% (4.4-4.8%)                                      | Abbott   Abbott Architect SARS-CoV-2 IgG assay   IgG | 41.2, 100.0 (FINDDx / MUHC independent evaluation)    | 10.2% (6.5-13.6%)                                |
| <b>Sweden</b>                                                             |                          |           |                  |                      |             |                                                                                       |            |                        |                                 |                                                      |                                                      |                                                       |                                                  |

| Article Author (Study Organization)                                        | Sampling Dates (YMD)     | Location                                                                                                | Geographic Scope | Overall Risk of Bias | Sample Size | Age          | Female (%) | Sampling method            | Sample Frame                    | Uncorrected Seroprevalence (95% Confidence Interval) | Test Manufacturers   Names   Isotypes                                                   | Test Sens, Spec (Source)                                                           | Corrected Seroprevalence (90% Credible Interval) |
|----------------------------------------------------------------------------|--------------------------|---------------------------------------------------------------------------------------------------------|------------------|----------------------|-------------|--------------|------------|----------------------------|---------------------------------|------------------------------------------------------|-----------------------------------------------------------------------------------------|------------------------------------------------------------------------------------|--------------------------------------------------|
| The Local News Sweden (Werlabs) <sup>76</sup>                              | 2020-07-01 to 2020-07-22 | Skåne, Västra Götaland, Uppland   Stockholm, Gothenburg, Malmö                                          | Local            | High                 | 83000       | NR           | nan        | Unclear                    | Household and community samples | 14.4% (14.2-14.6%)                                   | Werlabs   Not Reported   Not reported                                                   | No data                                                                            | -                                                |
| Stockholm Region Government (Sweden Public Health Authority) <sup>77</sup> | 2020-06-15 to 2020-07-15 |                                                                                                         | Local            | High                 | 149616      | NR           | nan        | Self-referral              | Household and community samples | 17.6% (17.4-17.8%)                                   | Not reported   Not Reported   Not reported                                              | No data                                                                            | -                                                |
| Lundkvist (Uppsala University) <sup>78</sup>                               | 2020-06-17 to 2020-06-18 | Södermanland, Uppland                                                                                   | Sublocal         | High                 | 90          | Mean 50 (NR) | 28.9       | Simplified probability     | Household and community samples | 30.0% (20.8-40.6%)                                   | Zhejiang Orient Gene Biotech Co Ltd   COVID-19 IgG / IgM Rapid Test Cassette   IgG; IgM | 43.4, 97.7 (FINDDx / MUHC independent evaluation)                                  | 69.5% (47.1-95.0%)                               |
| Lundkvist (Uppsala University) <sup>78</sup>                               | 2020-06-17 to 2020-06-18 | Södermanland, Uppland                                                                                   | Sublocal         | High                 | 123         | Mean 37 (NR) | 57.7       | Simplified probability     | Household and community samples | 4.1% (1.4-9.3%)                                      | Zhejiang Orient Gene Biotech Co Ltd   COVID-19 IgG / IgM Rapid Test Cassette   IgG; IgM | 43.4, 97.7 (FINDDx / MUHC independent evaluation)                                  | 7.0% (0.1-13.8%)                                 |
| Sweden Public Health Authority <sup>79</sup>                               | 2020-06-08 to 2020-06-14 | Jämtland-Härjedalen, Jönköping, Kalmar, Skåne, Stockholm, Uppsala, Västerbotten Västra Götaland, Örebro | National         | High                 | 1200        | NR           | nan        | Stratified non-probability | Residual sera                   | 5.6% (4.4-7.1%)                                      | Sci LifeLab / KTH   Not Reported   Not reported                                         | 75.6, 97.6 (Used Bastos SR/MA data; no sens, spec, or author adjustment available) | 4.3% (2.4-6.0%)                                  |
| Sweden Public Health Authority <sup>79</sup>                               | 2020-06-01 to 2020-06-07 | Jämtland-Härjedalen, Jönköping, Kalmar, Skåne, Stockholm, Uppsala, Västerbotten Västra Götaland, Örebro | National         | High                 | 1200        | NR           | nan        | Stratified non-probability | Residual sera                   | 7.0% (5.6-8.6%)                                      | Sci LifeLab / KTH   Not Reported   Not reported                                         | 75.6, 97.6 (Used Bastos SR/MA data; no sens, spec, or author adjustment available) | 6.2% (4.3-8.0%)                                  |

| Article Author (Study Organization)                      | Sampling Dates (YMD)     | Location                                                                                                | Geographic Scope | Overall Risk of Bias | Sample Size | Age                                                                                                     | Female (%) | Sampling method            | Sample Frame                    | Uncorrected Seroprevalence (95% Confidence Interval) | Test Manufacturers   Names   Isotypes              | Test Sens, Spec (Source)                                                           | Corrected Seroprevalence (90% Credible Interval) |
|----------------------------------------------------------|--------------------------|---------------------------------------------------------------------------------------------------------|------------------|----------------------|-------------|---------------------------------------------------------------------------------------------------------|------------|----------------------------|---------------------------------|------------------------------------------------------|----------------------------------------------------|------------------------------------------------------------------------------------|--------------------------------------------------|
| Sweden Public Health Authority <sup>79</sup>             | 2020-05-25 to 2020-05-31 | Jämtland-Härjedalen, Jönköping, Kalmar, Skåne, Stockholm, Uppsala, Västerbotten Västra Götaland, Örebro | National         | High                 | 1200        | NR                                                                                                      | nan        | Stratified non-probability | Residual sera                   | 5.6% (4.4-7.1%)                                      | Sci LifeLab / KTH   Not Reported   Not reported    | 75.6, 97.6 (Used Bastos SR/MA data; no sens, spec, or author adjustment available) | 4.3% (2.5-6.1%)                                  |
| Sweden Public Health Authority <sup>79</sup>             | 2020-05-18 to 2020-05-24 | Jämtland-Härjedalen, Jönköping, Kalmar, Skåne, Stockholm, Uppsala, Västerbotten Västra Götaland, Örebro | National         | High                 | 1200        | NR                                                                                                      | nan        | Stratified non-probability | Residual sera                   | 5.4% (4.2-6.8%)                                      | Sci LifeLab / KTH   Not Reported   Not reported    | 75.6, 97.6 (Used Bastos SR/MA data; no sens, spec, or author adjustment available) | 4.0% (2.2-5.8%)                                  |
| Roxhed (KTH Royal Institute of Technology) <sup>80</sup> | 2020-04-01 to 2020-05-21 | Uppland   Stockholm                                                                                     | Local            | Moderate             | 878         | 20-29 (n=135); 30-39 (n=174); 40-49 (n=165); 50-59 (n=151); 60-69 (n=130); 70-74 (n=79); Missing (n=44) | 55.0       | Simplified probability     | Household and community samples | 5.4% (4.0-7.1%)                                      | Author-designed   N/A - Author-designed   IgG; IgM | 100.0, 100.0 (Test developer / manufacturer evaluation)                            | 5.4% (4.1-6.8%)                                  |
| Sweden Public Health Authority <sup>79</sup>             | 2020-05-11 to 2020-05-17 | Jämtland-Härjedalen, Jönköping, Kalmar, Skåne, Stockholm, Uppsala, Västerbotten Västra Götaland, Örebro | National         | High                 | 1200        | NR                                                                                                      | nan        | Stratified non-probability | Residual sera                   | 4.6% (3.5-5.9%)                                      | Sci LifeLab / KTH   Not Reported   Not reported    | 75.6, 97.6 (Used Bastos SR/MA data; no sens, spec, or author adjustment available) | 2.9% (1.1-4.5%)                                  |
| Sweden Public Health Authority <sup>79</sup>             | 2020-05-04 to 2020-05-10 | Jämtland-Härjedalen, Jönköping, Kalmar, Skåne, Stockholm, Uppsala, Västerbotten                         | National         | High                 | 1200        | NR                                                                                                      | nan        | Stratified non-probability | Residual sera                   | 4.1% (3.1-5.4%)                                      | Sci LifeLab / KTH   Not Reported   Not reported    | 75.6, 97.6 (Used Bastos SR/MA data; no sens, spec, or author adjustment available) | 2.3% (0.7-3.9%)                                  |

| Article Author (Study Organization)                    | Sampling Dates (YMD)     | Location                                                                                                | Geographic Scope | Overall Risk of Bias | Sample Size | Age                                                                    | Female (%) | Sampling method            | Sample Frame                    | Uncorrected Seroprevalence (95% Confidence Interval) | Test Manufacturers   Names   Isotypes                      | Test Sens, Spec (Source)                                                           | Corrected Seroprevalence (90% Credible Interval) |
|--------------------------------------------------------|--------------------------|---------------------------------------------------------------------------------------------------------|------------------|----------------------|-------------|------------------------------------------------------------------------|------------|----------------------------|---------------------------------|------------------------------------------------------|------------------------------------------------------------|------------------------------------------------------------------------------------|--------------------------------------------------|
|                                                        |                          | Västra Götaland, Örebro                                                                                 |                  |                      |             |                                                                        |            |                            |                                 |                                                      |                                                            | adjustment available)                                                              |                                                  |
| Sweden Public Health Authority <sup>79</sup>           | 2020-04-27 to 2020-05-03 | Jämtland-Härjedalen, Jönköping, Kalmar, Skåne, Stockholm, Uppsala, Västerbotten Västra Götaland, Örebro | National         | High                 | 1200        | NR                                                                     | nan        | Stratified non-probability | Residual sera                   | 4.1% (3.1-5.4%)                                      | Sci LifeLab / KTH   Not Reported   Not reported            | 75.6, 97.6 (Used Bastos SR/MA data; no sens, spec, or author adjustment available) | 2.3% (0.7-3.8%)                                  |
| Sweden Public Health Authority <sup>79</sup>           | 2020-04-20 to 2020-04-26 | Jämtland-Härjedalen, Jönköping, Kalmar, Skåne, Stockholm, Uppsala, Västerbotten Västra Götaland, Örebro | National         | High                 | 1200        | NR                                                                     | nan        | Stratified non-probability | Residual sera                   | 5.2% (4.0-6.6%)                                      | Sci LifeLab / KTH   Not Reported   Not reported            | 75.6, 97.6 (Used Bastos SR/MA data; no sens, spec, or author adjustment available) | 3.7% (2.0-5.5%)                                  |
| <b>Switzerland</b>                                     |                          |                                                                                                         |                  |                      |             |                                                                        |            |                            |                                 |                                                      |                                                            |                                                                                    |                                                  |
| Fenwick (University of Lausanne) <sup>81</sup>         | 2020-05-04 to 2020-06-27 | Vaud                                                                                                    | Regional         | High                 | 311         | NR                                                                     | nan        | Simplified probability     | Household and community samples | 6.4% (3.9-9.7%)                                      | Author-designed   Luminex S protein trimer IgG assay   IgG | 97.0, 100.0 (Test developer / manufacturer evaluation)                             | 6.3% (3.8-8.8%)                                  |
| Stringhini (Geneva University Hospitals) <sup>82</sup> | 2020-04-06 to 2020-05-09 | Geneva   Geneva                                                                                         | Regional         | Moderate             | 2766        | 5-9 (n=123); 10-19 (n=332); 20-49 (n=1096); 50-54 (n=840); >65 (n=369) | 52.6       | Stratified probability     | Household and community samples | 7.8% (6.8-8.9%)                                      | EUROIMMUN   Euroimmun Anti-SARS-CoV-2 ELISA IgG   IgG      | 76.9, 97.0 (FINDDx / MUHC independent evaluation)                                  | 5.1% (0.7-8.6%)                                  |
| <b>United Kingdom</b>                                  |                          |                                                                                                         |                  |                      |             |                                                                        |            |                            |                                 |                                                      |                                                            |                                                                                    |                                                  |
| Public Health England <sup>83</sup>                    | 2020-07-20 to 2020-08-16 | England                                                                                                 | National         | Moderate             | 8940        | >16                                                                    | nan        | Stratified probability     | Blood donors                    | 5.5% (5.0-6.0%)                                      | EUROIMMUN   Euroimmun Anti-SARS-CoV-2 ELISA IgG   IgG      | 83.0, 99.3 (Used author-adjusted estimate)                                         | 5.5% (5.1-5.9%)                                  |

| Article Author (Study Organization)          | Sampling Dates (YMD)     | Location | Geographic Scope | Overall Risk of Bias | Sample Size | Age                                                                                                               | Female (%) | Sampling method        | Sample Frame                    | Uncorrected Seroprevalence (95% Confidence Interval) | Test Manufacturers   Names   Isotypes                 | Test Sens, Spec (Source)                              | Corrected Seroprevalence (90% Credible Interval) |
|----------------------------------------------|--------------------------|----------|------------------|----------------------|-------------|-------------------------------------------------------------------------------------------------------------------|------------|------------------------|---------------------------------|------------------------------------------------------|-------------------------------------------------------|-------------------------------------------------------|--------------------------------------------------|
| Public Health Scotland <sup>84</sup>         | 2020-06-29 to 2020-08-09 | Scotland | National         | High                 | 3220        | NR                                                                                                                | nan        | Sequential             | Blood donors                    | 3.1% (2.5-3.8%)                                      | Not reported   Not Reported   Not reported            | nan, nan (Used author-adjusted estimate)              | 3.1% (2.6-3.6%)                                  |
| Public Health England <sup>85</sup>          | 2020-06-01 to 2020-08-02 | England  | National         | Moderate             | 2062        | <30                                                                                                               | nan        | Stratified probability | Residual sera                   | 3.2% (2.5-4.1%)                                      | Abbott   Abbott Architect SARS-CoV-2 IgG assay   IgG  | 41.2, 100.0 (FINDDx / MUHC independent evaluation)    | 6.6% (3.3-9.9%)                                  |
| Public Health England <sup>85</sup>          | 2020-06-01 to 2020-08-02 | England  | National         | Moderate             | 285         | <20                                                                                                               | nan        | Stratified probability | Household and community samples | 4.9% (2.7-8.1%)                                      | Abbott   Abbott Architect SARS-CoV-2 IgG assay   IgG  | 41.2, 100.0 (FINDDx / MUHC independent evaluation)    | 10.9% (4.8-17.0%)                                |
| Office of National Statistics <sup>86</sup>  | 2020-04-26 to 2020-07-26 | England  | National         | Moderate             | 5248        | (n=5248)                                                                                                          | nan        | Stratified probability | Household and community samples | 6.2% (5.6-6.9%)                                      | University of Oxford   Oxford immunoassay   IgG       | 99.1, 99.0 (Test developer / manufacturer evaluation) | 5.2% (4.4-5.9%)                                  |
| Public Health England <sup>83</sup>          | 2020-07-13 to 2020-07-21 | England  | National         | Moderate             | 11351       | >16                                                                                                               | nan        | Stratified probability | Blood donors                    | 6.8% (6.3-7.3%)                                      | EUROIMMUN   Euroimmun Anti-SARS-CoV-2 ELISA IgG   IgG | 83.0, 99.3 (Used author-adjusted estimate)            | 6.8% (6.4-7.2%)                                  |
| Ward (Imperial College London) <sup>87</sup> | 2020-06-20 to 2020-07-13 | England  | Regional         | Low                  | 99908       | 18-24 (n=6499); 25-34 (n=13366); 35-44 (n=17052); 45-54 (n=20634); 55-64 (n=20404); 65-74 (n=15543); 75+ (n=6410) | 56.1       | Stratified probability | Household and community samples | 5.6% (5.5-5.7%)                                      | Fortress Diagnostics   LFIA Fortress   IgG            | 84.4, 98.6 (Author-reported independent evaluation)   | 4.9% (3.9-6.0%)                                  |
| Office of National Statistics <sup>88</sup>  | 2020-04-26 to 2020-07-08 | England  | National         | Moderate             | 4309        | (n=4309)                                                                                                          | nan        | Stratified probability | Household and community samples | 6.3% (5.6-7.1%)                                      | University of Oxford   Oxford immunoassay   IgG       | 99.1, 99.0 (Test developer / manufacturer evaluation) | 5.3% (4.4-6.1%)                                  |

| Article Author (Study Organization)                 | Sampling Dates (YMD)     | Location           | Geographic Scope | Overall Risk of Bias | Sample Size | Age                                                                     | Female (%) | Sampling method        | Sample Frame                    | Uncorrected Seroprevalence (95% Confidence Interval) | Test Manufacturers   Names   Isotypes                                       | Test Sens, Spec (Source)                             | Corrected Seroprevalence (90% Credible Interval) |
|-----------------------------------------------------|--------------------------|--------------------|------------------|----------------------|-------------|-------------------------------------------------------------------------|------------|------------------------|---------------------------------|------------------------------------------------------|-----------------------------------------------------------------------------|------------------------------------------------------|--------------------------------------------------|
| Public Health England <sup>83</sup>                 | 2020-06-08 to 2020-07-06 | England            | National         | Moderate             | 11385       | >16                                                                     | nan        | Stratified probability | Blood donors                    | 7.1% (6.6-7.6%)                                      | EUROIMMUN   Euroimmun Anti-SARS-CoV-2 ELISA IgG   IgG                       | 82.5, 99.1 (Used author-adjusted estimate)           | 7.1% (6.7-7.5%)                                  |
| Public Health England <sup>89</sup>                 | 2020-03-16 to 2020-06-30 | England            | National         | Moderate             | 6000        | >64                                                                     | nan        | Stratified probability | Residual sera                   | 3.9% (3.4-4.4%)                                      | EUROIMMUN   Euroimmun Anti-SARS-CoV-2 ELISA IgG   IgG                       | nan, nan (Used author-adjusted estimate)             | 3.9% (3.5-4.3%)                                  |
| Public Health Scotland <sup>84</sup>                | 2020-04-20 to 2020-06-21 | Scotland           | National         | High                 | 4744        | NR                                                                      | nan        | Sequential             | Residual sera                   | 4.3% (3.7-4.9%)                                      | Not reported   Not Reported   Not reported                                  | nan, nan (Used author-adjusted estimate)             | 4.3% (3.8-4.8%)                                  |
| Public Health England <sup>83</sup>                 | 2020-05-22 to 2020-06-08 | England            | National         | Moderate             | 5893        | >16                                                                     | nan        | Stratified probability | Blood donors                    | 8.2% (7.5-8.9%)                                      | EUROIMMUN   Euroimmun Anti-SARS-CoV-2 ELISA IgG   IgG                       | 82.5, 99.1 (Used author-adjusted estimate)           | 8.2% (7.6-8.8%)                                  |
| Wells (King's College London) <sup>90</sup>         | 2020-04-27 to 2020-06-02 | South East England | Regional         | High                 | 431         | Mean 48.38 (SD 28)                                                      | 85.2       | Unclear                | Household and community samples | 12.0% (9.1-15.4%)                                    | Imperial College London   Not reported   IgG; IgM                           | 90.0, 100.0 (Author-reported independent evaluation) | 12.9% (4.9-19.3%)                                |
| Public Health England <sup>85</sup>                 | 2020-05-01 to 2020-05-31 | England            | National         | Moderate             | 143         | <20                                                                     | nan        | Stratified probability | Household and community samples | 2.7% (0.7-6.9%)                                      | Abbott   Abbott Architect SARS-CoV-2 IgG assay   IgG                        | 41.2, 100.0 (FINDDx / MUHC independent evaluation)   | 5.8% (0.2-10.6%)                                 |
| Public Health England <sup>85</sup>                 | 2020-05-01 to 2020-05-31 | England            | National         | Moderate             | 1061        | <30                                                                     | nan        | Stratified probability | Residual sera                   | 7.8% (6.3-9.6%)                                      | Abbott   Abbott Architect SARS-CoV-2 IgG assay   IgG                        | 41.2, 100.0 (FINDDx / MUHC independent evaluation)   | 18.4% (12.2-23.9%)                               |
| Jersey Government (Statistics Jersey) <sup>91</sup> | 2020-05-15 to 2020-05-27 | Jersey             | Regional         | Moderate             | 1062        | 16-34 (n=247); 35-44 (n=168); 45-54 (n=189); 55-64 (n=211); >=65 (n=47) | 55.2       | Stratified probability | Household and community samples | 4.4% (3.2-5.8%)                                      | CTK Biotech   CTK Biotech Onsite COVID 19 IgG/IgM rapid test kit   IgG; IgM | 56.9, 95.6 (FINDDx / MUHC independent evaluation)    | 2.3% (0.0-4.8%)                                  |



| Article Author (Study Organization)           | Sampling Dates (YMD)     | Location                    | Geographic Scope | Overall Risk of Bias | Sample Size | Age | Female (%) | Sampling method        | Sample Frame                    | Uncorrected Seroprevalence (95% Confidence Interval) | Test Manufacturers   Names   Isotypes                  | Test Sens, Spec (Source)                               | Corrected Seroprevalence (90% Credible Interval) |
|-----------------------------------------------|--------------------------|-----------------------------|------------------|----------------------|-------------|-----|------------|------------------------|---------------------------------|------------------------------------------------------|--------------------------------------------------------|--------------------------------------------------------|--------------------------------------------------|
| Public Health England <sup>83</sup>           | 2020-04-30 to 2020-05-22 | England                     | National         | Moderate             | 7694        | >16 | nan        | Stratified probability | Blood donors                    | 8.6% (8.0-9.2%)                                      | EUROIMMUN   Euroimmun Anti-SARS-CoV-2 ELISA IgG   IgG  | 82.5, 99.1 (Used author-adjusted estimate)             | 8.6% (8.1-9.1%)                                  |
| Thompson (University of Oxford) <sup>92</sup> | 2020-03-17 to 2020-05-18 | Scotland                    | Regional         | High                 | 3500        | NR  | nan        | Sequential             | Blood donors                    | 3.2% (2.6-3.8%)                                      | Author-designed   N/A - Author-designed   Not reported | 94.1, 100.0 (Test developer / manufacturer evaluation) | 2.8% (1.1-4.4%)                                  |
| Public Health England <sup>85</sup>           | 2020-04-01 to 2020-04-30 | England                     | National         | Moderate             | 201         | <20 | nan        | Stratified probability | Household and community samples | 4.5% (2.1-8.4%)                                      | Abbott   Abbott Architect SARS-CoV-2 IgG assay   IgG   | 41.2, 100.0 (FINDDx / MUHC independent evaluation)     | 11.0% (3.8-17.7%)                                |
| Public Health England <sup>85</sup>           | 2020-04-01 to 2020-04-30 | England                     | National         | Moderate             | 647         | <30 | nan        | Stratified probability | Residual sera                   | 6.6% (4.8-8.8%)                                      | Abbott   Abbott Architect SARS-CoV-2 IgG assay   IgG   | 41.2, 100.0 (FINDDx / MUHC independent evaluation)     | 15.4% (9.2-21.0%)                                |
| Public Health England <sup>83</sup>           | 2020-04-24 to 2020-04-26 | England   Southwest England | Regional         | Moderate             | 865         | >16 | nan        | Stratified probability | Blood donors                    | 5.0% (3.6-6.7%)                                      | EUROIMMUN   Euroimmun Anti-SARS-CoV-2 ELISA IgG   IgG  | 82.5, 99.1 (Used author-adjusted estimate)             | 5.0% (3.9-6.3%)                                  |
| Public Health England <sup>83</sup>           | 2020-04-23 to 2020-04-24 | England   Midlands          | Regional         | Moderate             | 1043        | >16 | nan        | Stratified probability | Blood donors                    | 7.3% (5.8-9.1%)                                      | EUROIMMUN   Euroimmun Anti-SARS-CoV-2 ELISA IgG   IgG  | 82.5, 99.1 (Used author-adjusted estimate)             | 7.3% (6.1-8.7%)                                  |
| Public Health England <sup>83</sup>           | 2020-04-15 to 2020-04-20 | England   Northwest England | Regional         | Moderate             | 936         | >16 | nan        | Stratified probability | Blood donors                    | 6.2% (4.7-7.9%)                                      | EUROIMMUN   Euroimmun Anti-SARS-CoV-2 ELISA IgG   IgG  | 79.0, 99.0 (Used author-adjusted estimate)             | 6.2% (5.0-7.6%)                                  |
| Thompson (University of Oxford) <sup>92</sup> | 2020-04-18 to 2020-04-20 | Scotland                    | Local            | High                 | 490         | NR  | nan        | Sequential             | Blood donors                    | 8.6% (6.2-11.4%)                                     | Author-designed   N/A - Author-designed   Not reported | 94.1, 100.0 (Test developer / manufacturer evaluation) | 9.2% (5.5-12.5%)                                 |

| Article Author (Study Organization)                        | Sampling Dates (YMD)     | Location                             | Geographic Scope | Overall Risk of Bias | Sample Size | Age | Female (%) | Sampling method        | Sample Frame                    | Uncorrected Seroprevalence (95% Confidence Interval) | Test Manufacturers   Names   Isotypes                           | Test Sens, Spec (Source)                                      | Corrected Seroprevalence (90% Credible Interval) |
|------------------------------------------------------------|--------------------------|--------------------------------------|------------------|----------------------|-------------|-----|------------|------------------------|---------------------------------|------------------------------------------------------|-----------------------------------------------------------------|---------------------------------------------------------------|--------------------------------------------------|
| Public Health England <sup>83</sup>                        | 2020-04-14 to 2020-04-16 | England   Northeast England          | Regional         | Moderate             | 1017        | >16 | nan        | Stratified probability | Blood donors                    | 4.6% (3.4-6.1%)                                      | EUROIMMUN   Euroimmun Anti-SARS-CoV-2 ELISA IgG   IgG           | 79.0, 99.0 (Used author-adjusted estimate)                    | 4.6% (3.6-5.8%)                                  |
| Public Health England <sup>83</sup>                        | 2020-04-09 to 2020-04-13 | England   London                     | Regional         | Moderate             | 1085        | >16 | nan        | Stratified probability | Blood donors                    | 11.1% (9.3-13.1%)                                    | EUROIMMUN   Euroimmun Anti-SARS-CoV-2 ELISA IgG   IgG           | 82.5, 99.1 (Used author-adjusted estimate)                    | 11.1% (9.6-12.7%)                                |
| Public Health England <sup>83</sup>                        | 2020-04-02 to 2020-04-03 | England   Midlands                   | Regional         | Moderate             | 916         | >16 | nan        | Stratified probability | Blood donors                    | 2.4% (1.5-3.6%)                                      | EUROIMMUN   Euroimmun Anti-SARS-CoV-2 ELISA IgG   IgG           | 82.5, 99.1 (Used author-adjusted estimate)                    | 2.4% (1.7-3.3%)                                  |
| Public Health England <sup>85</sup>                        | 2020-02-01 to 2020-03-31 | England                              | National         | Moderate             | 443         | <30 | nan        | Stratified probability | Residual sera                   | 1.8% (0.8-3.5%)                                      | Abbott   Abbott Architect SARS-CoV-2 IgG assay   IgG            | 41.2, 100.0 (FINDDx / MUHC independent evaluation)            | 3.4% (0.1-6.0%)                                  |
| Public Health England <sup>85</sup>                        | 2020-02-01 to 2020-03-31 | England                              | National         | Moderate             | 106         | <20 | nan        | Stratified probability | Household and community samples | 1.4% (0.1-5.9%)                                      | Abbott   Abbott Architect SARS-CoV-2 IgG assay   IgG            | 41.2, 100.0 (FINDDx / MUHC independent evaluation)            | 4.0% (0.0-8.3%)                                  |
| Public Health England <sup>83</sup>                        | 2020-03-26 to 2020-03-27 | England   London                     | Regional         | Moderate             | 757         | >16 | nan        | Stratified probability | Blood donors                    | 2.6% (1.6-4.0%)                                      | EUROIMMUN   Euroimmun Anti-SARS-CoV-2 ELISA IgG   IgG           | 82.5, 99.1 (Used author-adjusted estimate)                    | 2.6% (1.8-3.7%)                                  |
| <b>United States of America</b>                            |                          |                                      |                  |                      |             |     |            |                        |                                 |                                                      |                                                                 |                                                               |                                                  |
| ABC7 (Riverside University Health System) <sup>93-95</sup> | 2020-07-06 to 2020-07-20 | California                           | Local            | Unclear              | 1726        | NR  | nan        | Randomized             | Household and community samples | 5.9% (4.8-7.1%)                                      | Not Reported   Not Reported   Not reported                      | No data                                                       | -                                                |
| Zauzmer (Washington DC Public Health) <sup>96</sup>        | 2020-06-15 to 2020-07-15 | District of Columbia   Washington DC | Local            | High                 | 13706       | NR  | nan        | Self-referral          | Household and community samples | 5.9% (5.5-6.3%)                                      | DiaSorin LIAISON; Abbot Alinity i   Not Reported   Not reported | 97.8, 97.8 (Used Bastos SR/MA data; no sens, spec, or author) | 3.9% (3.3-4.5%)                                  |

| Article Author (Study Organization)                                            | Sampling Dates (YMD)     | Location                                                                                          | Geographic Scope | Overall Risk of Bias | Sample Size | Age                                                                                                              | Female (%) | Sampling method        | Sample Frame                    | Uncorrected Seroprevalence (95% Confidence Interval) | Test Manufacturers   Names   Isotypes                                                 | Test Sens, Spec (Source)                           | Corrected Seroprevalence (90% Credible Interval) |
|--------------------------------------------------------------------------------|--------------------------|---------------------------------------------------------------------------------------------------|------------------|----------------------|-------------|------------------------------------------------------------------------------------------------------------------|------------|------------------------|---------------------------------|------------------------------------------------------|---------------------------------------------------------------------------------------|----------------------------------------------------|--------------------------------------------------|
|                                                                                |                          |                                                                                                   |                  |                      |             |                                                                                                                  |            |                        |                                 |                                                      |                                                                                       | adjustment available)                              |                                                  |
| Viglienzoni (University of Vermont) <sup>97</sup>                              | Until 2020-06-30         | Vermont   Chittenden                                                                              | Local            | High                 | 500         | NR                                                                                                               | nan        | Convenience            | Household and community samples | 2.2% (1.1-3.9%)                                      | University of Vermont   Not Reported   Not reported                                   | No data                                            | -                                                |
| Mahajan (Yale School of Medicine) <sup>98</sup>                                | 2020-06-04 to 2020-06-23 | Connecticut   Fairfield, Hartford, Litchfield, Middlesex, New Haven, New London, Tolland, Windham | Regional         | Moderate             | 505         | 18 to 29 (n=36, 7.1%); 30 to 44 (n=76, 15%); 45 to 54 (n=93, 18.4%); 55 to 64 (n=128, 25.3%); >65 (n=170, 33.7%) | 57.8       | Simplified probability | Household and community samples | 3.1% (1.8-5.0%)                                      | Ortho-Clinical Diagnostics   Ortho-Diagnostics VITROS anti-SARS-CoV-2 IgG assay   IgG | 77.4, 99.6 (FINDDx / MUHC independent evaluation)  | 3.4% (1.6-5.4%)                                  |
| Spectrum News (University of Louisville) <sup>99</sup>                         | 2020-06-10 to 2020-06-19 | Kentucky                                                                                          | Local            | High                 | 2237        | 18-34 (n=470); 35-59 (n=895); =>60 (n=895)                                                                       | nan        | Self-referral          | Household and community samples | 4.0% (3.2-4.9%)                                      | Not reported   Not Reported   Not reported                                            | No data                                            | -                                                |
| Sutton (Oregon Health Authority) <sup>100</sup>                                | 2020-05-11 to 2020-06-15 | Oregon                                                                                            | Regional         | High                 | 897         | 0-4 (n=5); 5-17 (n=24); 18-49 (n=274); 50-64 (n=211); 65-74 (n=178); 75-84 (n=144); >=85 (n=61)                  | nan        | Stratified probability | Residual sera                   | 1.0% (0.5-1.9%)                                      | Abbott   Abbott Architect SARS-CoV-2 IgG assay   IgG                                  | 41.2, 100.0 (FINDDx / MUHC independent evaluation) | 1.7% (0.0-3.1%)                                  |
| Hynes (Washoe County Health District) <sup>101</sup>                           | 2020-06-09 to 2020-06-10 | Nevada   Washoe County                                                                            | Local            | High                 | 234         | NR                                                                                                               | nan        | Stratified probability | Household and community samples | 2.3% (0.8-5.1%)                                      | Abbott   Not Reported   Not reported                                                  | No data                                            | -                                                |
| Harden (Routt County Board of Health) <sup>102</sup>                           | Until 2020-06-10         | Colorado                                                                                          | Local            | High                 | 649         | NR                                                                                                               | nan        | Self-referral          | Household and community samples | 2.6% (1.5-4.1%)                                      | Not reported   Not Reported   Not reported                                            | No data                                            | -                                                |
| Rudavsky (Indiana University Fairbanks School of Public Health) <sup>103</sup> | 2020-06-03 to 2020-06-08 | Indiana                                                                                           | Regional         | Unclear              | 3600        | NR                                                                                                               | nan        | Stratified probability | Household and community samples | 1.5% (1.1-2.0%)                                      | Not reported   Not Reported   Not reported                                            | No data                                            | -                                                |

| Article Author (Study Organization)                                                | Sampling Dates (YMD)     | Location                        | Geographic Scope | Overall Risk of Bias | Sample Size | Age                                                                                    | Female (%) | Sampling method        | Sample Frame                    | Uncorrected Seroprevalence (95% Confidence Interval) | Test Manufacturers   Names   Isotypes                | Test Sens, Spec (Source)                           | Corrected Seroprevalence (90% Credible Interval) |
|------------------------------------------------------------------------------------|--------------------------|---------------------------------|------------------|----------------------|-------------|----------------------------------------------------------------------------------------|------------|------------------------|---------------------------------|------------------------------------------------------|------------------------------------------------------|----------------------------------------------------|--------------------------------------------------|
| Ohnesorge (Psalms/Solid Rock Medicine Group) <sup>104</sup>                        | 2020-05-29 to 2020-05-29 | North Carolina   Burke County   | Local            | Unclear              | 329         | NR                                                                                     | nan        | Self-referral          | Household and community samples | 1.5% (0.5-3.5%)                                      | Not reported   Not Reported   Not reported           | No data                                            | -                                                |
| Hayden (Desert Healthcare District) <sup>105</sup>                                 | Until 2020-05-28         | California   Coachella Valley   | Local            | Unclear              | 896         | NR                                                                                     | 50.0       | Self-referral          | Household and community samples | 6.0% (4.5-7.8%)                                      | Phamatech   Not Reported   IgG; IgM                  | 86.7, 93.8 (FINDDx / MUHC independent evaluation)  | 2.0% (0.0-4.2%)                                  |
| Mukherjee (Humboldt County Department of Health and Human Services) <sup>106</sup> | Until 2020-05-26         | California   Humboldt County    | Local            | High                 | 1000        | NR                                                                                     | nan        | Unclear                | Household and community samples | 1.0% (0.5-1.8%)                                      | Not reported   Not Reported   Not reported           | No data                                            | -                                                |
| Alfini (UW Health) <sup>107</sup>                                                  | 2020-05-13 to 2020-05-20 | Wisconsin   Madison             | Local            | Unclear              | 433         | NR                                                                                     | nan        | Self-referral          | Household and community samples | 0.3% (0.0-1.4%)                                      | Not reported   Not Reported   Not reported           | No data                                            | -                                                |
| Alfini (UW Health) <sup>107</sup>                                                  | 2020-05-13 to 2020-05-20 | Wisconsin   Madison             | Local            | Unclear              | 5303        | NR                                                                                     | nan        | Self-referral          | Household and community samples | 1.5% (1.2-1.9%)                                      | Not reported   Not Reported   Not reported           | No data                                            | -                                                |
| McLaughlin (University of Washington) <sup>108</sup>                               | 2020-05-04 to 2020-05-19 | Idaho   Blaine County           | Local            | Moderate             | 917         | 18-29 (n=96); 30-39 (n=151); 40-49 (n=186); 50-59 (n=225); 60-69 (n=172); >=70 (n=87); | 52.2       | Self-referral          | Household and community samples | 22.7% (20.0-25.6%)                                   | Abbott   Abbott Architect SARS-CoV-2 IgG assay   IgG | 41.2, 100.0 (FINDDx / MUHC independent evaluation) | 56.5% (42.4-70.6%)                               |
| Feehan (Oschner Clinic Foundation) <sup>109</sup>                                  | 2020-05-09 to 2020-05-15 | Louisiana                       | Local            | Moderate             | 2640        | Mean 50.6 (NR)                                                                         | 63.5       | Stratified probability | Household and community samples | 6.9% (6.0-7.9%)                                      | Abbott   Abbott Architect SARS-CoV-2 IgG assay   IgG | 41.2, 100.0 (FINDDx / MUHC independent evaluation) | 16.1% (11.5-20.9%)                               |
| Boston (Boston Public Health Commission) <sup>110,111</sup>                        | Until 2020-05-15         | Massachusetts   Boston          | Local            | Moderate             | 750         | Median 42.4 (NR)                                                                       | 61.6       | Simplified probability | Household and community samples | 9.9% (7.9-12.3%)                                     | Not reported   Not Reported   Not reported           | No data                                            | -                                                |
| Sood (Stanford University School of Medicine) <sup>112</sup>                       | 2020-04-10 to 2020-05-14 | California   Los Angeles County | Local            | Moderate             | 863         | 18-34 (n=191); 35-54 (n=475);                                                          | 59.6       | Stratified probability | Household and                   | 4.3% (3.1-5.9%)                                      | Premier Biotech   Not                                | 70.5, 97.2 (FINDDx / MUHC)                         | 2.6% (0.0-4.7%)                                  |

| Article Author (Study Organization)                                             | Sampling Dates (YMD)     | Location                        | Geographic Scope | Overall Risk of Bias | Sample Size | Age                                                                 | Female (%) | Sampling method        | Sample Frame                    | Uncorrected Seroprevalence (95% Confidence Interval) | Test Manufacturers   Names   Isotypes                                                 | Test Sens, Spec (Source)                               | Corrected Seroprevalence (90% Credible Interval) |
|---------------------------------------------------------------------------------|--------------------------|---------------------------------|------------------|----------------------|-------------|---------------------------------------------------------------------|------------|------------------------|---------------------------------|------------------------------------------------------|---------------------------------------------------------------------------------------|--------------------------------------------------------|--------------------------------------------------|
|                                                                                 |                          |                                 |                  |                      |             | >= 55 years (n=197)                                                 |            |                        | community samples               |                                                      | Reported   IgG; IgM                                                                   | independent evaluation)                                |                                                  |
| Havers (US Centers for Disease Control and Prevention) <sup>113</sup>           | 2020-04-30 to 2020-05-12 | Minnesota                       | Regional         | Moderate             | 860         | 0-18 (n=49); 19-49 (n=370); 50-64 (n=239); >=65 (n=202)             | 52.8       | Convenience            | Residual sera                   | 2.4% (1.5-3.7%)                                      | CDC   CDC Non-commercial ELISA   IgG                                                  | 96.0, 99.3 (Used author-adjusted estimate)             | 2.4% (1.7-3.4%)                                  |
| Angeles (University of Southern California) <sup>114</sup>                      | 2020-05-08 to 2020-05-12 | California   Los Angeles County | Local            | Unclear              | 1014        | NR                                                                  | nan        | Self-referral          | Household and community samples | 2.1% (1.3-3.2%)                                      | Not reported   Not Reported   Not reported                                            | No data                                                | -                                                |
| Nesbitt (New York Blood Center) <sup>115</sup>                                  | 2020-04-27 to 2020-05-11 | Rhode Island                    | Regional         | Moderate             | 1996        | Median 56 (NR)                                                      | 47.3       | Sequential             | Blood donors                    | 0.7% (0.4-1.2%)                                      | Ortho-Clinical Diagnostics   Ortho-Diagnostics VITROS anti-SARS-CoV-2 IgG assay   IgG | 77.4, 99.6 (FINDDx / MUHC independent evaluation)      | 0.4% (0.0-0.8%)                                  |
| Biggs (CDC COVID-19 Response Team) <sup>116</sup>                               | 2020-04-28 to 2020-05-03 | Georgia                         | Local            | Low                  | 696         | NR                                                                  | 54.2       | Stratified probability | Household and community samples | 2.7% (1.7-4.2%)                                      | Ortho-Clinical Diagnostics   VITROS anti-SARS-CoV-2 total antibody   IgG; IgA; IgM    | 85.0, 99.4 (FINDDx / MUHC independent evaluation)      | 2.3% (0.7-3.6%)                                  |
| Havers (US Centers for Disease Control and Prevention) <sup>113</sup>           | 2020-04-26 to 2020-05-03 | Connecticut                     | Regional         | Moderate             | 1431        | 0-18 (n=219); 19-49 (n=297); 50-64 (n=300); >=65 (n=615)            | 50.9       | Convenience            | Residual sera                   | 4.9% (3.8-6.1%)                                      | CDC   CDC Non-commercial ELISA   IgG                                                  | 96.0, 99.3 (Used author-adjusted estimate)             | 4.9% (4.0-5.9%)                                  |
| Havers (US Centers for Disease Control and Prevention) <sup>113</sup>           | 2020-04-20 to 2020-05-03 | Utah                            | Regional         | Moderate             | 1132        | 0-18 (n=25); 19-49 (n=470); 50-64 (n=328); >=65 (n=315)             | 59.5       | Convenience            | Residual sera                   | 2.2% (1.4-3.2%)                                      | CDC   CDC Non-commercial ELISA   IgG                                                  | 96.0, 99.3 (Used author-adjusted estimate)             | 2.2% (1.6-3.0%)                                  |
| Shafa (Indiana University Fairbanks School of Public Health) <sup>117-119</sup> | 2020-05-02 to 2020-05-03 | Indiana   Indianapolis          | Local            | High                 | 898         | <20 (n=77); 20-39 (n=277); 40-59 (n=369); 60-79 (n=169); >=80 (n=6) | 58.2       | Self-referral          | Household and community samples | 5.8% (4.4-7.5%)                                      | Not reported   Not Reported   IgG                                                     | 100.0, 99.6 (Test developer / manufacturer evaluation) | 3.9% (1.0-6.2%)                                  |

| Article Author (Study Organization)                                             | Sampling Dates (YMD)     | Location          | Geographic Scope | Overall Risk of Bias | Sample Size | Age                                                                         | Female (%) | Sampling method        | Sample Frame                    | Uncorrected Seroprevalence (95% Confidence Interval) | Test Manufacturers   Names   Isotypes                                | Test Sens, Spec (Source)                                                           | Corrected Seroprevalence (90% Credible Interval) |
|---------------------------------------------------------------------------------|--------------------------|-------------------|------------------|----------------------|-------------|-----------------------------------------------------------------------------|------------|------------------------|---------------------------------|------------------------------------------------------|----------------------------------------------------------------------|------------------------------------------------------------------------------------|--------------------------------------------------|
| Shafa (Indiana University Fairbanks School of Public Health) <sup>117-119</sup> | 2020-04-25 to 2020-04-29 | Indiana           | Regional         | Moderate             | 3518        | <40 (n=1017); 40 to 59 (n=1328); >=60 (n=1313)                              | 56.7       | Stratified probability | Household and community samples | 1.1% (0.8-1.5%)                                      | Not reported   Not Reported   IgG                                    | 100.0, 99.6 (Test developer / manufacturer evaluation)                             | 0.5% (0.0-0.9%)                                  |
| Chamie (University of California, San Francisco) <sup>120</sup>                 | 2020-04-25 to 2020-04-28 | California        | Local            | High                 | 3861        | 4-10 (n=109); 11-17 (n=135); 18-50 (n=2466); 51-70 (n=916); >70 (n=190)     | 42.6       | Self-referral          | Household and community samples | 3.4% (2.9-4.0%)                                      | Abbott   Abbott Architect SARS-CoV-2 IgG assay   IgG                 | 41.2, 100.0 (FINDDx / MUHC independent evaluation)                                 | 7.2% (4.0-10.0%)                                 |
| Rosenberg (New York State Department of Health) <sup>121</sup>                  | 2020-04-19 to 2020-04-28 | New York          | Regional         | Moderate             | 15101       | 18-34 (n=3151); 35-44 (n=2628); 45-54 (n=3345); >=55 (n=5977)               | 56.1       | Convenience            | Household and community samples | 12.5% (12.0-13.0%)                                   | NYSDOH Wadsworth Center   SARS-CoV IgG Microsphere Immunoassay   IgG | 60.5, 99.2 (FINDDx / MUHC independent evaluation)                                  | 17.9% (12.9-23.5%)                               |
| Havers (US Centers for Disease Control and Prevention) <sup>113</sup>           | 2020-04-23 to 2020-04-27 | California        | Regional         | Moderate             | 1224        | 0-18 (n=45); 19-49 (n=371); 50-64 (n=323); >=65 (n=485)                     | 53.3       | Convenience            | Residual sera                   | 1.0% (0.5-1.7%)                                      | CDC   CDC Non-commercial ELISA   IgG                                 | 96.0, 99.3 (Used author-adjusted estimate)                                         | 1.0% (0.6-1.6%)                                  |
| Zou (Georgia State University) <sup>122</sup>                                   | 2020-04-17 to 2020-04-27 | Georgia   Atlanta | Local            | High                 | 127         | NR                                                                          | nan        | Convenience            | Household and community samples | 2.4% (0.5-6.7%)                                      | Author-designed   Krammer and colleagues ELISA S1   IgG              | 75.6, 97.6 (Used Bastos SR/MA data; no sens, spec, or author adjustment available) | 1.6% (0.0-3.6%)                                  |
| Havers (US Centers for Disease Control and Prevention) <sup>113</sup>           | 2020-04-20 to 2020-04-26 | Missouri          | Regional         | Moderate             | 1882        | 0-18 (n=158); 19-49 (n=394); 50-64 (n=405); >=65 (n=925)                    | 54.1       | Convenience            | Residual sera                   | 2.7% (2.0-3.5%)                                      | CDC   CDC Non-commercial ELISA   IgG                                 | 96.0, 99.3 (Used author-adjusted estimate)                                         | 2.7% (2.1-3.4%)                                  |
| Bryan (University of Washington School of Medicine) <sup>123</sup>              | 2020-04-20 to 2020-04-26 | Idaho   Boise     | Local            | High                 | 4856        | 0-19 (n=240); 20-29 (n=301); 30-39 (n=831); 40-49 (n=1102); 50-59 (n=1142); | 54.2       | Self-referral          | Household and community samples | 1.8% (1.4-2.2%)                                      | Abbott   Abbott Architect SARS-CoV-2 IgG assay   IgG                 | 41.2, 100.0 (FINDDx / MUHC independent evaluation)                                 | 3.3% (1.0-5.3%)                                  |

| Article Author (Study Organization)                                   | Sampling Dates (YMD)     | Location                 | Geographic Scope | Overall Risk of Bias | Sample Size | Age                                                        | Female (%) | Sampling method | Sample Frame                    | Uncorrected Seroprevalence (95% Confidence Interval) | Test Manufacturers   Names   Isotypes                       | Test Sens, Spec (Source)                                | Corrected Seroprevalence (90% Credible Interval) |
|-----------------------------------------------------------------------|--------------------------|--------------------------|------------------|----------------------|-------------|------------------------------------------------------------|------------|-----------------|---------------------------------|------------------------------------------------------|-------------------------------------------------------------|---------------------------------------------------------|--------------------------------------------------|
|                                                                       |                          |                          |                  |                      |             | 60-69 (n=888); 70-79 (n=327); >=80 (n=25)                  |            |                 |                                 |                                                      |                                                             |                                                         |                                                  |
| Havers (US Centers for Disease Control and Prevention) <sup>113</sup> | 2020-04-13 to 2020-04-25 | Pennsylvania             | Regional         | Moderate             | 824         | 0-18 (n=75); 19-49 (n=193); 50-64 (n=221); >=65 (n=355)    | 51.2       | Convenience     | Residual sera                   | 3.2% (2.1-4.6%)                                      | CDC   CDC Non-commercial ELISA   IgG                        | 96.0, 99.3 (Used author-adjusted estimate)              | 3.2% (2.3-4.3%)                                  |
| Waymer (OMNI Healthcare) <sup>124,125</sup>                           | 2020-04-17 to 2020-04-24 | Florida   Brevard County | Local            | High                 | 1000        | NR                                                         | nan        | Self-referral   | Household and community samples | 1.0% (0.5-1.8%)                                      | Not reported   Not Reported   IgM; IgG                      | 100.0, 100.0 (Test developer / manufacturer evaluation) | 0.7% (0.0-1.3%)                                  |
| Dingens (Fred Hutchinson Cancer Research Center) <sup>126</sup>       | 2020-03-03 to 2020-04-24 | Washington   Seattle     | Local            | High                 | 1076        | 0-4 (n=192); 5-9 (n=214); 10-14 (n=301); >15 (n=369)       | 49.7       | Convenience     | Residual sera                   | 0.7% (0.3-1.5%)                                      | Abbott   Abbott Architect SARS-CoV-2 IgG assay   IgG        | 41.2, 100.0 (FINDDx / MUHC independent evaluation)      | 1.2% (0.0-2.3%)                                  |
| Appa (University of California, San Francisco) <sup>127</sup>         | 2020-04-20 to 2020-04-24 | California               | Local            | High                 | 1880        | <18 (n=193); 18-44 (n=596); 45-60 (n=444); 60+ (n=657)     | 37.5       | Self-referral   | Household and community samples | 0.5% (0.2-0.9%)                                      | Abbott   Abbott Architect SARS-CoV-2 IgG assay   IgG        | 41.2, 100.0 (FINDDx / MUHC independent evaluation)      | 0.8% (0.0-1.5%)                                  |
| Paterson (Baton Rouge General Hospital) <sup>128</sup>                | Until 2020-04-21         | Louisiana   Baton Rouge  | Local            | Unclear              | 432         | NR                                                         | nan        | Unclear         | Household and community samples | 4.4% (2.7-6.8%)                                      | Mayo Clinic   Not Reported   Not reported                   | No data                                                 | -                                                |
| Stadlbauer (Icahn School of Medicine at Mount Sinai) <sup>129</sup>   | 2020-02-02 to 2020-04-19 | New York   New York City | Local            | High                 | 3412        | 0-20 (n=265); 21-40 (n=1380); 41-60 (n=674); >=61 (n=1093) | 65.8       | Convenience     | Residual sera                   | 4.3% (3.6-5.0%)                                      | Mount Sinai Hospital New York   N/A - Author-designed   IgG | 95.0, 100.0 (Test developer / manufacturer evaluation)  | 3.5% (1.7-5.1%)                                  |
| Havers (US Centers for Disease Control and Prevention) <sup>113</sup> | 2020-04-05 to 2020-04-10 | Florida                  | Regional         | Moderate             | 1742        | 0-18 (n=69); 19-49 (n=491); 50-64 (n=326); >=65 (n=856)    | 55.3       | Convenience     | Residual sera                   | 1.9% (1.3-2.7%)                                      | CDC   CDC Non-commercial ELISA   IgG                        | 96.0, 99.3 (Used author-adjusted estimate)              | 1.9% (1.4-2.5%)                                  |
| Havers (US Centers for Disease Control and Prevention) <sup>113</sup> | 2020-04-01 to 2020-04-08 | Louisiana                | Regional         | Moderate             | 1184        | 0-18 (n=33); 19-49 (n=619); 50-                            | 57.2       | Convenience     | Residual sera                   | 5.8% (4.5-7.3%)                                      | CDC   CDC Non-                                              | 96.0, 99.3 (Used author-                                | 5.8% (4.8-7.0%)                                  |

| Article Author (Study Organization)                                   | Sampling Dates (YMD)     | Location                        | Geographic Scope | Overall Risk of Bias | Sample Size | Age                                                                                                                                    | Female (%) | Sampling method        | Sample Frame                    | Uncorrected Seroprevalence (95% Confidence Interval) | Test Manufacturers   Names   Isotypes                             | Test Sens, Spec (Source)                          | Corrected Seroprevalence (90% Credible Interval) |
|-----------------------------------------------------------------------|--------------------------|---------------------------------|------------------|----------------------|-------------|----------------------------------------------------------------------------------------------------------------------------------------|------------|------------------------|---------------------------------|------------------------------------------------------|-------------------------------------------------------------------|---------------------------------------------------|--------------------------------------------------|
|                                                                       |                          |                                 |                  |                      |             | 64 (n=322); >=65 (n=212)                                                                                                               |            |                        |                                 |                                                      | commercial ELISA   IgG                                            | adjusted estimate)                                |                                                  |
| Bendavid (University of Stanford) <sup>130</sup>                      | 2020-04-03 to 2020-04-04 | California   Santa Clara Valley | Local            | High                 | 3330        | 0-4 (n=70); 5-18 (n=549); 19-64 (n=2541); >=65 (n=167)                                                                                 | 63.1       | Stratified probability | Household and community samples | 1.5% (1.1-2.0%)                                      | Premier Biotech   COVID-19 IgG/IgM Rapid Test Cassette   IgG; IgM | 70.5, 97.2 (FINDDx / MUHC independent evaluation) | 0.6% (0.0-1.2%)                                  |
| Havers (US Centers for Disease Control and Prevention) <sup>113</sup> | 2020-03-23 to 2020-04-01 | Washington                      | Regional         | Moderate             | 3264        | 0-18 (n=219); 19-49 (n=1213); 50-64 (n=782); >=65 (n=1050)                                                                             | 59.1       | Convenience            | Residual sera                   | 1.1% (0.8-1.5%)                                      | CDC   CDC Non-commercial ELISA   IgG                              | 96.0, 99.3 (Used author-adjusted estimate)        | 1.1% (0.8-1.4%)                                  |
| Havers (US Centers for Disease Control and Prevention) <sup>113</sup> | 2020-03-23 to 2020-04-01 | New York                        | Regional         | Moderate             | 2482        | 0-18 (n=311); 19-49 (n=909); 50-64 (n=455); >=65 (n=807)                                                                               | 53.7       | Convenience            | Residual sera                   | 6.9% (5.9-8.0%)                                      | CDC   CDC Non-commercial ELISA   IgG                              | 96.0, 99.3 (Used author-adjusted estimate)        | 6.9% (6.1-7.8%)                                  |
| Schuchat (University of Washington) <sup>131</sup>                    | 2020-03-01 to 2020-03-31 | Washington   Seattle            | Local            | High                 | 221         | NR                                                                                                                                     | nan        | Convenience            | Residual sera                   | 0.4% (0.0-2.4%)                                      | Not reported   Not Reported   Not reported                        | No data                                           | -                                                |
| <b>Latin America and Caribbean</b>                                    |                          |                                 |                  |                      |             |                                                                                                                                        |            |                        |                                 |                                                      |                                                                   |                                                   |                                                  |
| <b>Brazil</b>                                                         |                          |                                 |                  |                      |             |                                                                                                                                        |            |                        |                                 |                                                      |                                                                   |                                                   |                                                  |
| Menezes (Universidade Federal de Pelotas) <sup>132</sup>              | 2020-06-21 to 2020-06-24 |                                 | National         | Moderate             | 31869       | 0-4 (n=637); 5-9 (n=862); 10-19 (n=2789); 20-29 (n=2789); 30-39 (n=4999); 40-49 (n=5078); 50-59 (n=5032); 60-69 (n=4234); >70 (n=3273) | 58.5       | Stratified probability | Household and community samples | 2.7% (2.5-2.9%)                                      | Wondfo Biotech Co.   WONDFO SARS-CoV-2 Antibody Test   IgG; IgM   | 69.0, 99.1 (FINDDx / MUHC independent evaluation) | 2.1% (0.4-3.7%)                                  |
| Pelotas (Universidade Federal de Pelotas) <sup>133</sup>              | 2020-06-04 to 2020-06-07 |                                 | National         | Moderate             | 31165       | 0 to 80+                                                                                                                               | nan        | Simplified probability | Household and community samples | 3.1% (2.9-3.3%)                                      | Wondfo Biotech Co.   WONDFO SARS-CoV-2 Antibody Test   IgG; IgM   | 84.8, 99.0 (Used author-adjusted estimate)        | 3.1% (2.9-3.3%)                                  |



| Article Author (Study Organization)                                          | Sampling Dates (YMD)     | Location         | Geographic Scope | Overall Risk of Bias | Sample Size | Age                                                                                                                                                    | Female (%) | Sampling method        | Sample Frame                    | Uncorrected Seroprevalence (95% Confidence Interval) | Test Manufacturers   Names   Isotypes                           | Test Sens, Spec (Source)                              | Corrected Seroprevalence (90% Credible Interval) |
|------------------------------------------------------------------------------|--------------------------|------------------|------------------|----------------------|-------------|--------------------------------------------------------------------------------------------------------------------------------------------------------|------------|------------------------|---------------------------------|------------------------------------------------------|-----------------------------------------------------------------|-------------------------------------------------------|--------------------------------------------------|
| Vieira (Centro de Operações de Emergências em Saúde Pública)                 | 2020-05-31 to 2020-05-31 | Piauí   Teresina | Local            | Moderate             | 900         | NR                                                                                                                                                     | nan        | Stratified probability | Household and community samples | 8.3% (6.6-10.3%)                                     | Wondfo Biotech Co.   WONDFO SARS-CoV-2 Antibody Test   IgG; IgM | 69.0, 99.1 (FINDDx / MUHC independent evaluation)     | 9.7% (6.1-13.6%)                                 |
| Adriano (Centro de Operações de Emergências em Saúde Pública) <sup>134</sup> | 2020-05-24 to 2020-05-24 | Piauí   Teresina | Local            | Moderate             | 900         | NR                                                                                                                                                     | nan        | Stratified probability | Household and community samples | 5.8% (4.3-7.5%)                                      | Wondfo Biotech Co.   WONDFO SARS-CoV-2 Antibody Test   IgG; IgM | 69.0, 99.1 (FINDDx / MUHC independent evaluation)     | 6.1% (2.9-9.5%)                                  |
| Hallal (Universidade Federal de Pelotas) <sup>135</sup>                      | 2020-05-14 to 2020-05-21 |                  | National         | Low                  | 24995       | 0-4 (n=430); 5-9 (n=682); 10-19 (n=2287); 20-29 (n=3866); 30-39 (n=3834); 40-49 (n=3975); 50-59 (n=4015); 60-69 (n=3381); 70-79 (n=1797); >=80 (n=728) | 57.8       | Simplified probability | Household and community samples | 1.4% (1.2-1.5%)                                      | Wondfo Biotech Co.   WONDFO SARS-CoV-2 Antibody Test   IgG; IgM | 69.0, 99.1 (FINDDx / MUHC independent evaluation)     | 0.9% (0.0-1.6%)                                  |
| Adriano (Centro de Operações de Emergências em Saúde Pública) <sup>134</sup> | 2020-05-17 to 2020-05-17 | Piauí   Teresina | Local            | Moderate             | 900         | NR                                                                                                                                                     | nan        | Stratified probability | Household and community samples | 3.8% (2.6-5.2%)                                      | Wondfo Biotech Co.   WONDFO SARS-CoV-2 Antibody Test   IgG; IgM | 69.0, 99.1 (FINDDx / MUHC independent evaluation)     | 3.5% (0.6-5.8%)                                  |
| Gomes (Secretaria de Estado da Saúde do Espírito Santo) <sup>136</sup>       | 2020-05-13 to 2020-05-15 | Espírito Santo   | Regional         | Moderate             | 1163        | NR                                                                                                                                                     | nan        | Stratified probability | Household and community samples | 0.3% (0.1-0.8%)                                      | Celer Technologies Inc.   Not Reported   IgG; IgM               | 86.4, 97.6 (Test developer / manufacturer evaluation) | 0.2% (0.0-0.4%)                                  |
| Gomes (Secretaria de Estado da Saúde do Espírito Santo) <sup>136</sup>       | 2020-05-13 to 2020-05-15 | Espírito Santo   | Regional         | Moderate             | 4612        | <=20 years (n=434); 21-40 (n=1367); 41-60 (n=1583); 61-80 (n=1081); >= 81 (n=143)                                                                      | 60.9       | Stratified probability | Household and community samples | 2.1% (1.7-2.6%)                                      | Celer Technologies Inc.   Not Reported   IgG; IgM               | 86.4, 97.6 (Test developer / manufacturer evaluation) | 0.9% (0.0-1.8%)                                  |

| Article Author (Study Organization)                                           | Sampling Dates (YMD)     | Location                                                                                                                  | Geographic Scope | Overall Risk of Bias | Sample Size | Age                                                                                                                                 | Female (%) | Sampling method        | Sample Frame                    | Uncorrected Seroprevalence (95% Confidence Interval) | Test Manufacturers   Names   Isotypes                                                                | Test Sens, Spec (Source)                               | Corrected Seroprevalence (90% Credible Interval) |
|-------------------------------------------------------------------------------|--------------------------|---------------------------------------------------------------------------------------------------------------------------|------------------|----------------------|-------------|-------------------------------------------------------------------------------------------------------------------------------------|------------|------------------------|---------------------------------|------------------------------------------------------|------------------------------------------------------------------------------------------------------|--------------------------------------------------------|--------------------------------------------------|
| Tess (Universidade de São Paulo) <sup>137</sup>                               | 2020-05-04 to 2020-05-12 | São Paulo   São Paulo                                                                                                     | Local            | Moderate             | 517         | 18-44 (n=269); >= 45 (n=248)                                                                                                        | 54.9       | Simplified probability | Household and community samples | 4.7% (3.0-6.9%)                                      | SNIBE – Shenzhen New Industries Biomedical Engineering Co.   MAGLUMI 2019-nCoV IgG (CLIA)   IgG; IgM | 100.0, 99.5 (Test developer / manufacturer evaluation) | 3.0% (0.5-5.3%)                                  |
| Watanabe (Grupo Fleury) <sup>138</sup>                                        | 2020-05-04 to 2020-05-12 | São Paulo   São Paulo                                                                                                     | Sublocal         | Unclear              | 520         | NR                                                                                                                                  | nan        | Stratified probability | Household and community samples | 5.2% (3.4-7.5%)                                      | Not reported   Not Reported   Not reported                                                           | No data                                                | -                                                |
| Silveira (Universidade Federal de Pelotas) <sup>139</sup>                     | 2020-05-09 to 2020-05-11 | Rio Grande do Sul   Uruguainana, Ijuí, Passo Fundo, Caxias, Canoas, Porto Alegre, Pelotas, Santa Maria, Santa Cruz do Sul | Regional         | Low                  | 4500        | 0-9 (n=113); 10-19 (n=266); 20-29 (n=581); 30-39 (n=684); 40-49 (n=689); 50-59 (n=769); 60-69 (n=734); 70-79 (n=464); >=80 (n=202); | 58.9       | Stratified probability | Household and community samples | 0.2% (0.1-0.4%)                                      | Wondfo Biotech Co.   WONDFO SARS-CoV-2 Antibody Test   IgM; IgG                                      | 78.3, 98.4 (FINDDx / MUHC independent evaluation)      | 0.1% (0.0-0.2%)                                  |
| Adriano ( Centro de Operações de Emergências em Saúde Pública) <sup>134</sup> | 2020-05-10 to 2020-05-10 | Piauí   Teresina                                                                                                          | Local            | Moderate             | 900         | NR                                                                                                                                  | nan        | Stratified probability | Household and community samples | 2.0% (1.2-3.1%)                                      | Wondfo Biotech Co.   WONDFO SARS-CoV-2 Antibody Test   IgG; IgM                                      | 69.0, 99.1 (FINDDx / MUHC independent evaluation)      | 1.6% (0.0-2.8%)                                  |
| Adriano ( Centro de Operações de Emergências em Saúde Pública) <sup>134</sup> | 2020-05-03 to 2020-05-03 | Piauí   Teresina                                                                                                          | Local            | Moderate             | 900         | NR                                                                                                                                  | nan        | Stratified probability | Household and community samples | 1.4% (0.8-2.5%)                                      | Wondfo Biotech Co.   WONDFO SARS-CoV-2 Antibody Test   IgG; IgM                                      | 69.0, 99.1 (FINDDx / MUHC independent evaluation)      | 1.0% (0.0-2.0%)                                  |
| Silveira (Universidade Federal de Pelotas) <sup>139</sup>                     | 2020-04-25 to 2020-04-27 | Rio Grande do Sul   Uruguainana, Ijuí, Passo Fundo, Caxias, Canoas, Porto Alegre, Pelotas,                                | Regional         | Low                  | 4501        | 0-9 (n=116); 10-19 (n=227); 20-29 (n=508); 30-39 (n=753); 40-49 (n=647);                                                            | 58.9       | Stratified probability | Household and community samples | 0.1% (0.0-0.3%)                                      | Wondfo Biotech Co.   WONDFO SARS-CoV-2 Antibody Test   IgM; IgG                                      | 78.3, 98.4 (FINDDx / MUHC independent evaluation)      | 0.1% (0.0-0.1%)                                  |

| Article Author (Study Organization)                                          | Sampling Dates (YMD)     | Location                                                                                                          | Geographic Scope | Overall Risk of Bias | Sample Size | Age                                                                                                                                 | Female (%) | Sampling method        | Sample Frame                    | Uncorrected Seroprevalence (95% Confidence Interval) | Test Manufacturers   Names   Isotypes                           | Test Sens, Spec (Source)                               | Corrected Seroprevalence (90% Credible Interval) |
|------------------------------------------------------------------------------|--------------------------|-------------------------------------------------------------------------------------------------------------------|------------------|----------------------|-------------|-------------------------------------------------------------------------------------------------------------------------------------|------------|------------------------|---------------------------------|------------------------------------------------------|-----------------------------------------------------------------|--------------------------------------------------------|--------------------------------------------------|
|                                                                              |                          | Santa Maria, Santa Cruz do Sul                                                                                    |                  |                      |             | 50-59 (n=798); 60-69 (n=798); 70-79 (n=459); >=80 (n=156)                                                                           |            |                        |                                 |                                                      |                                                                 |                                                        |                                                  |
| Filho (Universidade do Estado do Rio de Janeiro) <sup>140</sup>              | 2020-04-14 to 2020-04-27 | Rio de Janeiro   Rio de Janeiro                                                                                   | Local            | Moderate             | 2857        | 18-29 (n=870); 30-49 (n=1443); 50-69 (n=544)                                                                                        | 49.2       | Sequential             | Blood donors                    | 4.0% (3.3-4.8%)                                      | MedLevensohn   MedTest Coronavirus 2019-nCoV IgG/IgM   IgM; IgG | 85.0, 99.0 (Test developer / manufacturer evaluation)  | 2.7% (0.1-4.5%)                                  |
| Adriano (Centro de Operações de Emergências em Saúde Pública) <sup>134</sup> | 2020-04-26 to 2020-04-26 | Piaui   Teresina                                                                                                  | Local            | Moderate             | 900         | NR                                                                                                                                  | nan        | Stratified probability | Household and community samples | 0.9% (0.4-1.7%)                                      | Wondfo Biotech Co.   WONDFO SARS-CoV-2 Antibody Test   IgG; IgM | 69.0, 99.1 (FINDDx / MUHC independent evaluation)      | 0.7% (0.0-1.4%)                                  |
| Adriano (Centro de Operações de Emergências em Saúde Pública) <sup>134</sup> | 2020-04-19 to 2020-04-19 | Piaui   Teresina                                                                                                  | Local            | Moderate             | 900         | NR                                                                                                                                  | nan        | Stratified probability | Household and community samples | 0.6% (0.2-1.3%)                                      | Wondfo Biotech Co.   WONDFO SARS-CoV-2 Antibody Test   IgG; IgM | 69.0, 99.1 (FINDDx / MUHC independent evaluation)      | 0.5% (0.0-1.0%)                                  |
| Silveira (Universidade Federal de Pelotas) <sup>139</sup>                    | 2020-04-11 to 2020-04-13 | Rio Grande do Sul   Uruguainana, Ijuí, Passo Fundo, Canoas, Porto Alegre, Pelotas, Santa Maria, Santa Cruz do Sul | Regional         | Low                  | 4151        | 0-9 (n=149); 10-19 (n=224); 20-29 (n=506); 30-39 (n=635); 40-49 (n=643); 50-59 (n=734); 60-69 (n=685); 70-79 (n=3985); >=80 (n=183) | 58.3       | Stratified probability | Household and community samples | 0.0% (0.0-0.2%)                                      | Wondfo Biotech Co.   WONDFO SARS-CoV-2 Antibody Test   IgM; IgG | 78.3, 98.4 (FINDDx / MUHC independent evaluation)      | 0.0% (0.0-0.1%)                                  |
| <b>Ecuador</b>                                                               |                          |                                                                                                                   |                  |                      |             |                                                                                                                                     |            |                        |                                 |                                                      |                                                                 |                                                        |                                                  |
| Brutto (Universidad Peruana Cayetano Heredia) <sup>141</sup>                 | 2020-05-25 to 2020-05-31 | El Oro                                                                                                            | Local            | High                 | 673         | Mean 59.2 (SD 12.8)                                                                                                                 | 56.6       | Entire sample          | Household and community samples | 45.0% (41.2-48.8%)                                   | Biohit Health Care Ltd   Not Reported   IgG; IgM                | 97.5, 100.0 (Test developer / manufacturer evaluation) | 47.5% (42.4-52.5%)                               |

| Article Author (Study Organization)                                                                           | Sampling Dates (YMD)     | Location                                        | Geographic Scope | Overall Risk of Bias | Sample Size | Age                                                                         | Female (%) | Sampling method        | Sample Frame                    | Uncorrected Seroprevalence (95% Confidence Interval) | Test Manufacturers   Names   Isotypes                                                           | Test Sens, Spec (Source)                                                           | Corrected Seroprevalence (90% Credible Interval) |
|---------------------------------------------------------------------------------------------------------------|--------------------------|-------------------------------------------------|------------------|----------------------|-------------|-----------------------------------------------------------------------------|------------|------------------------|---------------------------------|------------------------------------------------------|-------------------------------------------------------------------------------------------------|------------------------------------------------------------------------------------|--------------------------------------------------|
| Brutto (The Atahualpa Project) <sup>142</sup>                                                                 | 2020-05-01 to 2020-05-31 | El Oro   Atahualpa                              | Local            | High                 | 319         | Mean 70.5 (SD 7.8)                                                          | 58.6       | Convenience            | Household and community samples | 44.2% (38.7-49.8%)                                   | Biohit Health Care Ltd   BIOHIT SARS-CoV-2 antibody test kit (Colloidal gold method)   IgG; IgM | 96.7, 95.0 (Test developer / manufacturer evaluation)                              | 43.2% (36.3-50.8%)                               |
| <b>Peru</b>                                                                                                   |                          |                                                 |                  |                      |             |                                                                             |            |                        |                                 |                                                      |                                                                                                 |                                                                                    |                                                  |
| Peruvian Government (National Center for Epidemiology, Prevention and Control of Diseases) <sup>143-145</sup> | 2020-06-28 to 2020-07-09 | Metropolitan Lima and Callao                    | Local            | High                 | 3118        | NR                                                                          | nan        | Stratified probability | Household and community samples | 21.6% (20.2-23.1%)                                   | Not reported   Not Reported   IgG; IgM                                                          | 66.0, 96.6 (Used Bastos SR/MA data; no sens, spec, or author adjustment available) | 29.1% (27.1-31.4%)                               |
| <b>North Africa and Middle East</b>                                                                           |                          |                                                 |                  |                      |             |                                                                             |            |                        |                                 |                                                      |                                                                                                 |                                                                                    |                                                  |
| <b>Iran</b>                                                                                                   |                          |                                                 |                  |                      |             |                                                                             |            |                        |                                 |                                                      |                                                                                                 |                                                                                    |                                                  |
| Shakiba (Guilan University) <sup>146</sup>                                                                    | 2020-04-01 to 2020-04-30 | Guilan   Rasht, Anzali, Astara, Lahijan, Rudbar | Regional         | Moderate             | 528         | <5 (n=27); 5-18 (n=107); 18-60 (n=343); >60 (n=74)                          | 51.1       | Stratified probability | Household and community samples | 21.0% (17.6-24.7%)                                   | VivaChek   VivaDiag COVID-19 IgM/IgG Rapid Test   IgM; IgG                                      | 83.3, 66.7 (FINDDx / MUHC independent evaluation)                                  | 5.4% (0.0-11.3%)                                 |
| <b>Jordan</b>                                                                                                 |                          |                                                 |                  |                      |             |                                                                             |            |                        |                                 |                                                      |                                                                                                 |                                                                                    |                                                  |
| Sughayer (King Hussein Cancer Centre) <sup>147</sup>                                                          | 2020-01-15 to 2020-06-15 | Jordan   Amman                                  | Regional         | High                 | 734         | 18-30 (n = 301); 31-40 (n=158); 41-50 (n=73); 51-63 (n=30); Unknown (n=172) | 14.7       | Simplified probability | Blood donors                    | 0.0% (0.0-0.5%)                                      | Roche elecsys   Elecsys Anti-SARS-CoV-2 kit   IgG; IgM; IgA                                     | 73.0, 100.0 (FINDDx / MUHC independent evaluation)                                 | 0.1% (0.0-0.5%)                                  |
| <b>South Asia</b>                                                                                             |                          |                                                 |                  |                      |             |                                                                             |            |                        |                                 |                                                      |                                                                                                 |                                                                                    |                                                  |
| <b>India</b>                                                                                                  |                          |                                                 |                  |                      |             |                                                                             |            |                        |                                 |                                                      |                                                                                                 |                                                                                    |                                                  |
| Bedi (Delhi National Centre for Disease Control) <sup>148</sup>                                               | 2020-08-01 to 2020-08-07 | Delhi                                           | Regional         | Unclear              | 15289       | NR                                                                          | nan        | Randomized             | Blood donors                    | 28.3% (27.6-29.0%)                                   | Not reported   Not Reported   Not reported                                                      | No data                                                                            | -                                                |

| Article Author<br>(Study Organization)                         | Sampling Dates<br>(YMD)     | Location                                                                                                                                                                                                                                                                                                                                                                                                                                                                                                                                                                                                                                                                                                                               | Geographic<br>Scope | Overall Risk<br>of Bias | Sample<br>Size | Age | Female<br>(%) | Sampling<br>method        | Sample Frame                             | Uncorrected<br>Seroprevalence<br>(95%<br>Confidence<br>Interval) | Test<br>Manufacturers  <br>Names   Isotypes      | Test Sens, Spec<br>(Source)                                                                             | Corrected<br>Seroprevalence<br>(90% Credible<br>Interval) |
|----------------------------------------------------------------|-----------------------------|----------------------------------------------------------------------------------------------------------------------------------------------------------------------------------------------------------------------------------------------------------------------------------------------------------------------------------------------------------------------------------------------------------------------------------------------------------------------------------------------------------------------------------------------------------------------------------------------------------------------------------------------------------------------------------------------------------------------------------------|---------------------|-------------------------|----------------|-----|---------------|---------------------------|------------------------------------------|------------------------------------------------------------------|--------------------------------------------------|---------------------------------------------------------------------------------------------------------|-----------------------------------------------------------|
| Husain (King<br>George's Medical<br>University) <sup>149</sup> | 2020-07-05 to<br>2020-07-19 | Uttar Pradesh  <br>Lucknow                                                                                                                                                                                                                                                                                                                                                                                                                                                                                                                                                                                                                                                                                                             | Local               | High                    | 1235           | NR  | nan           | Convenience               | Blood<br>donors                          | 3.7% (2.7-<br>4.9%)                                              | Not reported  <br>Not Reported  <br>IgG          | No data                                                                                                 | -                                                         |
| Hindustan Times<br>(Thyrocare) <sup>150,151</sup>              | 2020-06-28 to<br>2020-07-19 | New Dehli,<br>Thane, Madurai,<br>Chennai,<br>Samastipur,<br>Mumbai,<br>Tiruvallur,<br>Valsad,<br>Hooghly,<br>Gautam Buddha<br>Nagar,<br>Ghaziabad,<br>Erode,<br>Nalgonda,<br>Faridabad,<br>Howrah, Surat,<br>Bhojpur,<br>Hyderabad,<br>Kolkata,<br>K.V.Rangaredd<br>y, Aurangabad,<br>Ananthapur,<br>Bellary,<br>Vaishali, Patna,<br>Bhagalpur,<br>South 24<br>Parganas,<br>Mahendragarh,<br>Mahabub<br>Nagar,<br>Ahmedabad,<br>Gurgaon,<br>Khammam,<br>Muzaffarpur,<br>Navi Mumbai,<br>Ganjam, North<br>24 Parganas,<br>Vadodara,<br>Pondicherry,<br>Karim Nagar,<br>Bangalore,<br>Nashi, Khorda,<br>Bulandshahr,<br>Kanchipuram,<br>West Godavari,<br>East Godavari,<br>Jaipur,<br>Mahseana,<br>Ranshi,<br>Warangal, Pune,<br>Medak, | National            | High                    | 53000          | NR  | nan           | Simplified<br>probability | Household<br>and<br>community<br>samples | 15.0% (14.7-<br>15.3%)                                           | Not reported  <br>Not Reported  <br>Not reported | 97.8, 97.8<br>(Used Bastos<br>SR/MA data;<br>no sens,<br>spec, or<br>author<br>adjustment<br>available) | 13.4% (12.9-<br>14.0%)                                    |

| Article Author (Study Organization)                           | Sampling Dates (YMD)     | Location                                                                                                                                           | Geographic Scope | Overall Risk of Bias | Sample Size | Age                                                     | Female (%) | Sampling method        | Sample Frame                    | Uncorrected Seroprevalence (95% Confidence Interval) | Test Manufacturers   Names   Isotypes                    | Test Sens, Spec (Source)                                                           | Corrected Seroprevalence (90% Credible Interval) |
|---------------------------------------------------------------|--------------------------|----------------------------------------------------------------------------------------------------------------------------------------------------|------------------|----------------------|-------------|---------------------------------------------------------|------------|------------------------|---------------------------------|------------------------------------------------------|----------------------------------------------------------|------------------------------------------------------------------------------------|--------------------------------------------------|
|                                                               |                          | Bardhaman, South Goa, Dharwad, Visakhapantam, Katihar, Guntur, Chittoor, Lucknow, Bhopal, East Singhbhum, Kolhapur, Thanjavur, Alibaug, Coimbatore |                  |                      |             |                                                         |            |                        |                                 |                                                      |                                                          |                                                                                    |                                                  |
| Kakani ( University of Chicago) <sup>152,153</sup>            | 2020-07-03 to 2020-07-19 |                                                                                                                                                    | Regional         | Low                  | 2702        | 12-24 (n=176); 25-39 (n=733); 40-60 (n=1349); 60+ (444) | 29.7       | Stratified probability | Household and community samples | 16.1% (14.7-17.5%)                                   | Abbott   Abbott Architect SARS-CoV-2 IgG assay   IgG     | 41.2, 100.0 (FINDDx / MUHC independent evaluation)                                 | 39.8% (30.5-49.2%)                               |
| Mishra (Haryana Health Department) <sup>154</sup>             | 2020-06-21 to 2020-07-15 | Haryana   Gurugram, Faridabad, Ambala, Panchkula, Sonipat                                                                                          | Regional         | High                 | 1544        | NR                                                      | nan        | Stratified probability | Household and community samples | 12.0% (10.4-13.7%)                                   | Not reported   Not Reported   IgG                        | 75.6, 97.6 (Used Bastos SR/MA data; no sens, spec, or author adjustment available) | 13.0% (10.8-15.1%)                               |
| Saxena (Indian Center for Disease Control) <sup>155,156</sup> | 2020-06-27 to 2020-07-10 | Delhi                                                                                                                                              | Regional         | Moderate             | 21387       | NR                                                      | nan        | Stratified probability | Household and community samples | 23.5% (22.9-24.1%)                                   | Zydus Cadila Healthcare   COVID KAVACH   IgG             | 98.7, 100.0 (Test developer / manufacturer evaluation)                             | 24.1% (21.5-26.5%)                               |
| Kumar (Thiruvananthapuram Health Department) <sup>157</sup>   | 2020-06-09 to 2020-07-10 | Kerala   Thiruvananthapuram                                                                                                                        | Local            | Unclear              | 450         | NR                                                      | nan        | Unclear                | Household and community samples | 2.7% (1.4-4.6%)                                      | Not reported   Not Reported   IgM; IgG                   | No data                                                                            | -                                                |
| Koshy (Indian Council of Medical Research) <sup>158-161</sup> | 2020-05-11 to 2020-05-25 | Andhra Pradesh, Assam, Bihar, Chhattisgarh, Gujarat, Jharkhand, Karnataka, Kerala, Madhya Pradesh, Maharashtra, Odisha, Punjab,                    | National         | Moderate             | 26400       | NR                                                      | nan        | Stratified probability | Household and community samples | 0.7% (0.6-0.8%)                                      | ICMR-National Institute of Virology   Not Reported   IgG | 75.6, 97.6 (Used Bastos SR/MA data; no sens, spec, or author adjustment available) | 0.0% (0.0-0.1%)                                  |

| Article Author<br>(Study Organization)                                                                 | Sampling Dates<br>(YMD)     | Location                                                                                                                                        | Geographic<br>Scope | Overall Risk<br>of Bias | Sample<br>Size | Age                                | Female<br>(%) | Sampling<br>method        | Sample Frame                             | Uncorrected<br>Seroprevalence<br>(95%<br>Confidence<br>Interval) | Test<br>Manufacturers  <br>Names   Isotypes                                                                            | Test Sens, Spec<br>(Source)                                    | Corrected<br>Seroprevalence<br>(90% Credible<br>Interval) |
|--------------------------------------------------------------------------------------------------------|-----------------------------|-------------------------------------------------------------------------------------------------------------------------------------------------|---------------------|-------------------------|----------------|------------------------------------|---------------|---------------------------|------------------------------------------|------------------------------------------------------------------|------------------------------------------------------------------------------------------------------------------------|----------------------------------------------------------------|-----------------------------------------------------------|
|                                                                                                        |                             | Haryana,<br>Rajasthan,<br>Tamil Nadu,<br>Telangana,<br>Uttar Pradesh,<br>Uttarakhand,<br>Himachal<br>Pradesh, West<br>Bengal, Jammu,<br>Kashmir |                     |                         |                |                                    |               |                           |                                          |                                                                  |                                                                                                                        |                                                                |                                                           |
| <b>Pakistan</b>                                                                                        |                             |                                                                                                                                                 |                     |                         |                |                                    |               |                           |                                          |                                                                  |                                                                                                                        |                                                                |                                                           |
| Younas (National<br>Institute of Blood<br>Diseases & Bone<br>Marrow<br>Transplantation) <sup>162</sup> | 2020-05-15 to<br>2020-07-15 | Sindh                                                                                                                                           | Local               | High                    | 370            | Mean 30.6<br>(SD 6.3)              | 0.0           | Sequential                | Blood<br>donors                          | 34.6% (29.8-<br>39.7%)                                           | Roche<br>Diagnostics  <br>Elecys Anti-<br>SARS-Cov2<br>Immunoassay  <br>IgA; IgM; IgG                                  | 73.0, 100.0<br>(FINDDx /<br>MUHC<br>independent<br>evaluation) | 51.1% (39.1-<br>63.3%)                                    |
| <b>Southeast Asia, East Asia, and Oceania</b>                                                          |                             |                                                                                                                                                 |                     |                         |                |                                    |               |                           |                                          |                                                                  |                                                                                                                        |                                                                |                                                           |
| <b>China</b>                                                                                           |                             |                                                                                                                                                 |                     |                         |                |                                    |               |                           |                                          |                                                                  |                                                                                                                        |                                                                |                                                           |
| Chang (Beijing<br>Hospital) <sup>163</sup>                                                             | 2020-01-15 to<br>2020-04-30 | Hubei   Wuhan                                                                                                                                   | Local               | High                    | 17794          | Median 33<br>(IQR 19-47)           | 39.7          | Sequential                | Blood<br>donors                          | 2.3% (2.1-<br>2.5%)                                              | Wantai<br>Biological<br>Pharmacy<br>Enterprise  <br>Wantai SARS<br>CoV-2 Total<br>Antibody<br>ELISA   IgA;<br>IgG; IgM | 93.1, 99.1<br>(FINDDx /<br>MUHC<br>independent<br>evaluation)  | 1.2% (0.2-<br>2.1%)                                       |
| Liu (Zhongnan<br>Hospital of Wuhan<br>University) <sup>164</sup>                                       | 2020-02-29 to<br>2020-04-29 | Hubei   Wuhan                                                                                                                                   | Local               | Moderate                | 19555          | Mean 41.6<br>(95% CI<br>41.4-41.8) | 50.2          | Convenience               | Household<br>and<br>community<br>samples | 4.6% (4.3-<br>4.9%)                                              | YHLO   SARS-<br>CoV-2<br>IgM/IgG CLIA<br>kits   IgG                                                                    | 73.1, 100.0<br>(FINDDx /<br>MUHC<br>independent<br>evaluation) | 5.1% (1.4-<br>7.8%)                                       |
| Ling ( Chinese<br>Center for Disease<br>Control and<br>Prevention) <sup>165</sup>                      | 2020-03-25 to<br>2020-04-28 | Hubei   Wuhan                                                                                                                                   | Local               | Moderate                | 18712          | Median 40<br>(Range 4-81)          | 39.1          | Self-referral             | Household<br>and<br>community<br>samples | 3.3% (3.0-<br>3.5%)                                              | Innovita   2019-<br>nCoV Ab Test<br>(Colloidal<br>Gold)   IgG;<br>IgM                                                  | 56.9, 96.3<br>(FINDDx /<br>MUHC<br>independent<br>evaluation)  | 1.6% (0.0-<br>3.2%)                                       |
| Xu (Institute of<br>Blood Transfusion)<br><sup>166</sup>                                               | 2020-03-23 to<br>2020-04-02 | Guangdong                                                                                                                                       | Local               | High                    | 2199           | Median 34<br>(Range 18 to<br>59 )  | 32.3          | Simplified<br>probability | Blood<br>donors                          | 0.3% (0.1-<br>0.7%)                                              | Wantai<br>Biological<br>Pharmacy<br>Enterprise;                                                                        | 75.6, 97.6<br>(Used Bastos<br>SR/MA data;<br>no sens,          | 0.1% (0.0-<br>0.2%)                                       |

| Article Author (Study Organization)                                      | Sampling Dates (YMD)     | Location             | Geographic Scope | Overall Risk of Bias | Sample Size | Age                   | Female (%) | Sampling method | Sample Frame                    | Uncorrected Seroprevalence (95% Confidence Interval) | Test Manufacturers   Names   Isotypes                                                          | Test Sens, Spec (Source)                               | Corrected Seroprevalence (90% Credible Interval) |
|--------------------------------------------------------------------------|--------------------------|----------------------|------------------|----------------------|-------------|-----------------------|------------|-----------------|---------------------------------|------------------------------------------------------|------------------------------------------------------------------------------------------------|--------------------------------------------------------|--------------------------------------------------|
|                                                                          |                          |                      |                  |                      |             |                       |            |                 |                                 |                                                      | Lizhu Diagnostics   Wantai SARS CoV-2 Total Antibody ELISA   IgA; IgG                          | spec, or author adjustment available)                  |                                                  |
| To (Queen Mary Hospital) <sup>167</sup>                                  | 2020-03-04 to 2020-03-17 | Hubei                | Regional         | Moderate             | 452         | Median 41 (NR)        | 58.6       | Convenience     | Household and community samples | 2.9% (1.5-4.9%)                                      | Author-designed   Not Reported   IgG                                                           | 73.3, 100.0 (Test developer / manufacturer evaluation) | 3.6% (1.5-6.1%)                                  |
| Chang (Beijing Hospital) <sup>163</sup>                                  | 2020-01-23 to 2020-03-15 | Hebei   Shijiazhuang | Local            | High                 | 13540       | Median 40 (IQR 33-48) | 17.7       | Sequential      | Blood donors                    | 0.0% (0.0-0.0%)                                      | Wantai Biological Pharmacy Enterprise   Wantai SARS CoV-2 Total Antibody ELISA   IgA; IgG; IgM | 93.1, 99.1 (FINDDx / MUHC independent evaluation)      | 0.0% (0.0-0.0%)                                  |
| Chang (Beijing Hospital) <sup>163</sup>                                  | 2020-02-02 to 2020-03-15 | Guangdong   Shenzhen | Local            | High                 | 6810        | Median 36 (IQR 19-53) | 35.0       | Sequential      | Blood donors                    | 0.0% (0.0-0.1%)                                      | Wantai Biological Pharmacy Enterprise   Wantai SARS CoV-2 Total Antibody ELISA   IgA; IgG; IgM | 93.1, 99.1 (FINDDx / MUHC independent evaluation)      | 0.0% (0.0-0.0%)                                  |
| To (Queen Mary Hospital) <sup>167</sup>                                  | 2020-02-01 to 2020-02-13 | Hong Kong            | Regional         | High                 | 233         | NR                    | nan        | Sequential      | Household and community samples | 0.4% (0.0-2.4%)                                      | Author-designed   Not Reported   IgG                                                           | 73.3, 100.0 (Test developer / manufacturer evaluation) | 1.0% (0.0-2.2%)                                  |
| To (Queen Mary Hospital) <sup>167</sup>                                  | 2020-01-01 to 2020-01-31 | Hong Kong            | Regional         | High                 | 580         | NR                    | nan        | Sequential      | Household and community samples | 2.6% (1.5-4.2%)                                      | Author-designed   Not Reported   IgG                                                           | 73.3, 100.0 (Test developer / manufacturer evaluation) | 3.2% (1.1-5.2%)                                  |
| Hallowell (US Centers for Disease Control and Prevention) <sup>168</sup> | 2020-01-28 to 2020-01-28 | Hubei   Wuhan        | Sublocal         | Moderate             | 186         | Median 42.0 (NR)      | 47.8       | Convenience     | Household and community samples | 0.5% (0.0-3.0%)                                      | SeraCare Life Sciences   HRP-conjugated anti human                                             | 75.6, 97.6 (Used Bastos SR/MA data; no sens, spec, or  | 0.8% (0.0-2.0%)                                  |



| Article Author (Study Organization)                            | Sampling Dates (YMD)     | Location                            | Geographic Scope | Overall Risk of Bias | Sample Size | Age                                                                       | Female (%) | Sampling method        | Sample Frame                    | Uncorrected Seroprevalence (95% Confidence Interval) | Test Manufacturers   Names   Isotypes                     | Test Sens, Spec (Source)                               | Corrected Seroprevalence (90% Credible Interval) |
|----------------------------------------------------------------|--------------------------|-------------------------------------|------------------|----------------------|-------------|---------------------------------------------------------------------------|------------|------------------------|---------------------------------|------------------------------------------------------|-----------------------------------------------------------|--------------------------------------------------------|--------------------------------------------------|
|                                                                |                          |                                     |                  |                      |             |                                                                           |            |                        |                                 |                                                      | IgM/IgA/IgG   IgG; IgA; IgM                               | author adjustment available)                           |                                                  |
| <b>Malaysia</b>                                                |                          |                                     |                  |                      |             |                                                                           |            |                        |                                 |                                                      |                                                           |                                                        |                                                  |
| Sam (University Malaya) <sup>169</sup>                         | 2020-01-29 to 2020-06-06 | Selangor                            | Regional         | High                 | 588         | NR                                                                        | 62.6       | Convenience            | Residual sera                   | 0.4% (0.1-1.3%)                                      | Author-designed   N/A - Author-designed   IgG             | 97.0, 100.0 (Test developer / manufacturer evaluation) | 0.4% (0.0-0.8%)                                  |
| <b>Sub-Saharan Africa</b>                                      |                          |                                     |                  |                      |             |                                                                           |            |                        |                                 |                                                      |                                                           |                                                        |                                                  |
| <b>Ethiopia</b>                                                |                          |                                     |                  |                      |             |                                                                           |            |                        |                                 |                                                      |                                                           |                                                        |                                                  |
| Kempen ( Kuwait University) <sup>170</sup>                     | 2020-05-18 to 2020-05-21 | Oromia   Addis Ababa                | Local            | High                 | 99          | (n=99)                                                                    | nan        | Convenience            | Residual sera                   | 3.0% (0.6-8.6%)                                      | Abbott   Abbott Architect SARS-CoV-2 IgG assay   IgG      | 41.2, 100.0 (FINDDx / MUHC independent evaluation)     | 6.4% (0.1-12.3%)                                 |
| <b>Kenya</b>                                                   |                          |                                     |                  |                      |             |                                                                           |            |                        |                                 |                                                      |                                                           |                                                        |                                                  |
| Uyoga (KEMRI-Wellcome Trust Research Programme) <sup>171</sup> | 2020-04-30 to 2020-06-16 | Rift Valley, Coast, Central, Nyanza | National         | High                 | 3098        | 15-24 (n=808); 25-34 (n=1242); 35-44 (n=714); 45-54 (n=263); 55-64 (n=71) | 18.0       | Convenience            | Blood donors                    | 4.9% (4.2-5.7%)                                      | Krammer   Krammer Enzyme linked Immunosorbent assay   IgG | 83.0, 99.0 (Test developer / manufacturer evaluation)  | 5.2% (3.4-6.9%)                                  |
| <b>Nigeria</b>                                                 |                          |                                     |                  |                      |             |                                                                           |            |                        |                                 |                                                      |                                                           |                                                        |                                                  |
| Majiya (Ibrahim Badamasi Babangida University) <sup>172</sup>  | 2020-06-26 to 2020-06-30 | Niger State                         | Regional         | Moderate             | 185         | NR                                                                        | 44.3       | Stratified probability | Household and community samples | 25.4% (19.3-32.3%)                                   | Cambridge Network   COVID-19 IgG and IgM Rapid Test   IgG | 100.0, 100.0 (Author-reported independent evaluation)  | 18.7% (3.8-31.5%)                                |

**Supplementary Table 2. Characteristics of studies in the special populations and primary seroprevalence estimates**

| Article Author (Study Organization)                                                    | Sampling Dates (YMD)     | Location                                          | Geographic Scope | Overall Risk of Bias | Sample Size | Age                     | Female (%) | Sampling method | Sample Frame                                   | Uncorrected Seroprevalence (95% Confidence Interval) | Test Manufacturers   Names   Isotypes                                                     | Test Sens, Spec (Source)                               | Corrected Seroprevalence (90% Credible Interval) |
|----------------------------------------------------------------------------------------|--------------------------|---------------------------------------------------|------------------|----------------------|-------------|-------------------------|------------|-----------------|------------------------------------------------|------------------------------------------------------|-------------------------------------------------------------------------------------------|--------------------------------------------------------|--------------------------------------------------|
| <b>Central Europe, Eastern Europe, and Central Asia</b>                                |                          |                                                   |                  |                      |             |                         |            |                 |                                                |                                                      |                                                                                           |                                                        |                                                  |
| <b>Armenia</b>                                                                         |                          |                                                   |                  |                      |             |                         |            |                 |                                                |                                                      |                                                                                           |                                                        |                                                  |
| Grigoryan (Ministry of Health of the Republic of Armenia) <sup>173</sup>               | Until 2020-06-29         | Yerevan                                           | Local            | High                 | 380         | NR                      | nan        | Convenience     | Health care workers and caregivers             | 16.1% (12.5-20.1%)                                   | Not reported   Not Reported   Not reported                                                | 100.0, 99.8 (Test developer / manufacturer evaluation) | 14.3% (10.4-18.9%)                               |
| <b>Bulgaria</b>                                                                        |                          |                                                   |                  |                      |             |                         |            |                 |                                                |                                                      |                                                                                           |                                                        |                                                  |
| Tsaneva-Damyanova (Medical Diagnostic Laboratory "STATUS" ) <sup>174</sup>             | 2020-03-26 to 2020-04-20 | Varna   Varna                                     | Local            | High                 | 586         | NR                      | 56.1       | Self-referral   | Patients seeking care for non-COVID-19 reasons | 4.8% (3.2-6.9%)                                      | Zhejiang Orient Gene Biotech Co., LTD   COVID-19 IgG / IgM Rapid Test Cassette   IgG; IgM | 43.4, 97.7 (FINDDx / MUHC independent evaluation)      | 6.3% (0.3-11.4%)                                 |
| <b>Croatia</b>                                                                         |                          |                                                   |                  |                      |             |                         |            |                 |                                                |                                                      |                                                                                           |                                                        |                                                  |
| Vilibic-Cavlek (University of Zagreb) <sup>175</sup>                                   | 2020-04-25 to 2020-05-24 |                                                   | National         | High                 | 592         | 20-65                   | 74.3       | Convenience     | Health care workers and caregivers             | 2.7% (1.6-4.3%)                                      | Vircell Spain S.L.U   Not Reported   IgG                                                  | 74.0, 97.0 (FINDDx / MUHC independent evaluation)      | 1.3% (0.0-2.6%)                                  |
| Jerkovic (University of Split) <sup>176</sup>                                          | 2020-04-23 to 2020-04-28 | Split-Dalmatia County, Šibenik-Knin County        | Local            | High                 | 1494        | Median 46 (Range 19-79) | 11.9       | Convenience     | Essential non-healthcare workers               | 1.3% (0.8-2.0%)                                      | AMP Diagnostics   AMP Rapid Test SARS-CoV-2 IgG/IgM   IgM; IgG                            | 91.8, 96.4 (Test developer / manufacturer evaluation)  | 0.4% (0.0-0.9%)                                  |
| <b>Czechia</b>                                                                         |                          |                                                   |                  |                      |             |                         |            |                 |                                                |                                                      |                                                                                           |                                                        |                                                  |
| Malickova (Clinical and Research Center for Inflammatory Bowel Disease) <sup>177</sup> | Until 2020-04-15         | Central Bohemian   Prague                         | Sublocal         | Unclear              | 92          | Median 45 (IQR 38-57)   | 71.7       | Convenience     | Health care workers and caregivers             | 2.2% (0.3-7.6%)                                      | EUROIMMUN   Euroimmun Anti-SARS-CoV-2 ELISA IgG   IgG                                     | 76.9, 97.0 (FINDDx / MUHC independent evaluation)      | 1.9% (0.0-4.4%)                                  |
| <b>Romania</b>                                                                         |                          |                                                   |                  |                      |             |                         |            |                 |                                                |                                                      |                                                                                           |                                                        |                                                  |
| MedLife (MedLife) <sup>178</sup>                                                       | 2020-03-24 to 2020-04-21 | Nord-Est, Sud-Est, Sud-Mutenia, Sud-Vest Oltenia, | National         | Unclear              | 371         | NR                      | nan        | Convenience     | Health care workers and caregivers             | 3.0% (1.5-5.2%)                                      | Abbott; Maglumi; YHLO   Multiple tests used in combination   IgG; IgM                     | 97.8, 97.8 (Used Bastos SR/MA data; no sens, spec,     | 1.1% (0.0-2.2%)                                  |

| Article Author (Study Organization)                                     | Sampling Dates (YMD)     | Location                                                                                                                                          | Geographic Scope | Overall Risk of Bias | Sample Size | Age                     | Female (%) | Sampling method        | Sample Frame                       | Uncorrected Seroprevalence (95% Confidence Interval) | Test Manufacturers   Names   Isotypes                                | Test Sens, Spec (Source)                               | Corrected Seroprevalence (90% Credible Interval) |
|-------------------------------------------------------------------------|--------------------------|---------------------------------------------------------------------------------------------------------------------------------------------------|------------------|----------------------|-------------|-------------------------|------------|------------------------|------------------------------------|------------------------------------------------------|----------------------------------------------------------------------|--------------------------------------------------------|--------------------------------------------------|
|                                                                         |                          | Vest, Nord-Vest, Centru, Bucuresti-Ilfov   Bucharest, Arad, Brasov, Sibiu, Piatra Neamt, Braila, Timisoara, Pitesti, Galati, Targoviste, Ploiesti |                  |                      |             |                         |            |                        |                                    |                                                      |                                                                      | or author adjustment available)                        |                                                  |
| <b>High-income</b>                                                      |                          |                                                                                                                                                   |                  |                      |             |                         |            |                        |                                    |                                                      |                                                                      |                                                        |                                                  |
| <b>Argentina</b>                                                        |                          |                                                                                                                                                   |                  |                      |             |                         |            |                        |                                    |                                                      |                                                                      |                                                        |                                                  |
| Figar (Minister of Health, Buenos Aires City) <sup>179</sup>            | 2020-06-10 to 2020-07-01 | Buenos Aires   Buenos Aires                                                                                                                       | Sublocal         | High                 | 60          | NR                      | nan        | Convenience            | Persons living in slums            | 36.0% (24.0-49.4%)                                   | Laboratio Lemos   COVIDAR IgG ELISA   IgG                            | 95.0, 100.0 (Test developer / manufacturer evaluation) | 38.7% (26.5-50.3%)                               |
| Figar (Minister of Health, Buenos Aires City) <sup>179</sup>            | 2020-06-10 to 2020-07-01 | Buenos Aires   Buenos Aires                                                                                                                       | Sublocal         | Moderate             | 873         | Median 38 (IQR 28-49)   | 57.2       | Simplified probability | Persons living in slums            | 53.4% (50.0-56.8%)                                   | Laboratio Lemos   COVIDAR IgG ELISA   IgG                            | 95.0, 100.0 (Test developer / manufacturer evaluation) | 58.7% (51.6-64.8%)                               |
| <b>Australia</b>                                                        |                          |                                                                                                                                                   |                  |                      |             |                         |            |                        |                                    |                                                      |                                                                      |                                                        |                                                  |
| Macartney (University of Sydney) <sup>180</sup>                         | 2020-01-25 to 2020-04-10 | New South Wales                                                                                                                                   | Regional         | Moderate             | 173         | NR                      | nan        | Convenience            | Contacts of COVID patients         | 2.3% (0.6-5.8%)                                      | Author-designed   N/A - Author-designed   IgG; IgA; IgM              | 91.3, 98.9 (Test developer / manufacturer evaluation)  | 1.6% (0.0-3.2%)                                  |
| <b>Austria</b>                                                          |                          |                                                                                                                                                   |                  |                      |             |                         |            |                        |                                    |                                                      |                                                                      |                                                        |                                                  |
| Hackner (Karl Landsteiner University of Health Sciences) <sup>181</sup> | 2020-04-01 to 2020-04-30 |                                                                                                                                                   | Sublocal         | High                 | 130         | Median 41 (Range 19-64) | 76.9       | Convenience            | Health care workers and caregivers | 2.3% (0.5-6.6%)                                      | Epitope Diagnostics   Not Reported   IgG; IgM                        | 75.4, 89.8 (FINDDx / MUHC independent evaluation)      | 1.4% (0.0-3.1%)                                  |
| Reiter (Medical University of Vienna) <sup>182</sup>                    | 2020-03-15 to 2020-03-29 |                                                                                                                                                   | Sublocal         | High                 | 235         | Mean 44.2 (SD 11.4)     | 70.2       | Convenience            | Health care workers and caregivers | 25.5% (20.1-31.6%)                                   | ImmunoDiagnostics   ImmunoDiagnostics test system IgG IgM   IgM; IgG | 75.6, 97.6 (Used Bastos SR/MA data; no sens, spec,     | 31.2% (24.9-37.9%)                               |

| Article Author (Study Organization)                                     | Sampling Dates (YMD)     | Location                    | Geographic Scope | Overall Risk of Bias | Sample Size | Age                                                                                                                                    | Female (%) | Sampling method | Sample Frame                                   | Uncorrected Seroprevalence (95% Confidence Interval) | Test Manufacturers   Names   Isotypes                                                                       | Test Sens, Spec (Source)                              | Corrected Seroprevalence (90% Credible Interval) |
|-------------------------------------------------------------------------|--------------------------|-----------------------------|------------------|----------------------|-------------|----------------------------------------------------------------------------------------------------------------------------------------|------------|-----------------|------------------------------------------------|------------------------------------------------------|-------------------------------------------------------------------------------------------------------------|-------------------------------------------------------|--------------------------------------------------|
|                                                                         |                          |                             |                  |                      |             |                                                                                                                                        |            |                 |                                                |                                                      |                                                                                                             | or author adjustment available)                       |                                                  |
| Orth-Höller (Innsbruck Clinical Microbiology Laboratory) <sup>183</sup> | 2020-03-20 to 2020-03-27 | Tyrol                       | Regional         | High                 | 377         | Median 51 (NR)                                                                                                                         | 46.7       | Convenience     | Health care workers and caregivers             | 0.3% (0.0-1.5%)                                      | EUROIMMUN   Euroimmun Anti-SARS-CoV-2 ELISA IgG   IgG                                                       | 76.9, 97.0 (FINDDx / MUHC independent evaluation)     | 0.4% (0.0-1.0%)                                  |
| <b>Belgium</b>                                                          |                          |                             |                  |                      |             |                                                                                                                                        |            |                 |                                                |                                                      |                                                                                                             |                                                       |                                                  |
| Blairon (Iris Hospitals South) <sup>184</sup>                           | 2020-05-25 to 2020-06-19 | Brussels                    | Local            | High                 | 1485        | Median 47.45 (Males); 43.90 (Females) (Range 46.00-48.84 (Males); 42.80-45.10 (Females))                                               | 73.1       | Convenience     | Health care workers and caregivers             | 14.6% (12.9-16.5%)                                   | DiaSorin   Liaison® SARS- CoV-2 S1/S2 IgG   IgG                                                             | 80.8, 96.0 (FINDDx / MUHC independent evaluation)     | 11.9% (6.0-18.8%)                                |
| Berardis (Cliniques universitaires Saint-Luc) <sup>185</sup>            | 2020-04-16 to 2020-05-19 |                             | Local            | High                 | 149         | Mean 24.9 (SD 15)                                                                                                                      | 49.0       | Convenience     | Patients seeking care for non-COVID-19 reasons | 2.7% (0.7-6.8%)                                      | SNIBE – Shenzhen New Industries Biomedical Engineering Co., Ltd   MAGLUMI 2019-nCov IgG/IgM CLIA   IgG; IgM | 95.6, 96.0 (Test developer / manufacturer evaluation) | 1.6% (0.0-3.4%)                                  |
| Martin (Université Libre de Bruxelles) <sup>186</sup>                   | 2020-04-15 to 2020-05-18 | Brussels   City of Brussels | Local            | High                 | 326         | Mean 37 (Range 21-66)                                                                                                                  | 73.3       | Convenience     | Health care workers and caregivers             | 11.0% (7.8-14.9%)                                    | EUROIMMUN   Euroimmun Anti-SARS-CoV-2 ELISA IgG   IgG                                                       | 42.9, 98.0 (FINDDx / MUHC independent evaluation)     | 22.0% (8.8-34.6%)                                |
| Steensels (ZiekenhuisOost-Limburg) <sup>187</sup>                       | 2020-04-22 to 2020-04-30 | Limburg   Genk              | Sublocal         | High                 | 3056        | Mean 39.5 (staff with antibodies); 41.3 (staff without antibodies) (SD 13.1 (staff with antibodies); 12.4 (staff without antibodies) ) | nan        | Convenience     | Health care workers and caregivers             | 6.4% (5.6-7.3%)                                      | Multi-G   COVID-19 IgG/IgM Rapid Test Cassette   IgG                                                        | 64.7, 97.1 (FINDDx / MUHC independent evaluation)     | 4.5% (0.1-8.0%)                                  |
| <b>Chile</b>                                                            |                          |                             |                  |                      |             |                                                                                                                                        |            |                 |                                                |                                                      |                                                                                                             |                                                       |                                                  |

| Article Author (Study Organization)                    | Sampling Dates (YMD)     | Location                    | Geographic Scope | Overall Risk of Bias | Sample Size | Age                                                                        | Female (%) | Sampling method        | Sample Frame                                   | Uncorrected Seroprevalence (95% Confidence Interval) | Test Manufacturers   Names   Isotypes                                                           | Test Sens, Spec (Source)                                                           | Corrected Seroprevalence (90% Credible Interval) |
|--------------------------------------------------------|--------------------------|-----------------------------|------------------|----------------------|-------------|----------------------------------------------------------------------------|------------|------------------------|------------------------------------------------|------------------------------------------------------|-------------------------------------------------------------------------------------------------|------------------------------------------------------------------------------------|--------------------------------------------------|
| Torres (Universidade de Chile) <sup>188</sup>          | 2020-05-04 to 2020-05-19 | Santiago   Vitacura         | Sublocal         | High                 | 1009        | Mean 10.8 (SD 4.1)                                                         | 46.0       | Stratified probability | Students                                       | 9.9% (8.1-11.9%)                                     | Genrui Biotech   Genrui Biotech IgG/IgM Test Kit (Colloidal Gold)   IgG; IgM                    | 91.0, 95.4 (Test developer / manufacturer evaluation)                              | 5.1% (1.6-8.2%)                                  |
| Torres (Universidade de Chile) <sup>188</sup>          | 2020-05-04 to 2020-05-19 | Santiago   Vitacura         | Sublocal         | High                 | 235         | Mean 42.8 (SD 10.4)                                                        | 73.2       | Stratified probability | Essential non-healthcare workers               | 16.6% (12.1-22.0%)                                   | Genrui Biotech   Genrui Biotech IgG/IgM Test Kit (Colloidal Gold)   IgG; IgM                    | 91.0, 95.4 (Test developer / manufacturer evaluation)                              | 13.3% (7.9-18.7%)                                |
| <b>Denmark</b>                                         |                          |                             |                  |                      |             |                                                                            |            |                        |                                                |                                                      |                                                                                                 |                                                                                    |                                                  |
| Jespersen (Aarhus University Hospital) <sup>41</sup>   | 2020-05-18 to 2020-06-19 | Central Denmark Region      | Regional         | Moderate             | 17971       | <29 (n=2032); 30-39 (n=3938); 40-49 (n=4735); 50-59 (n=4666); >60 (n=2577) | 85.8       | Convenience            | Health care workers and caregivers             | 3.7% (3.4-4.0%)                                      | Wantai Biological Pharmacy Enterprise   Wantai SARS CoV-2 Total Antibody ELISA   Total Antibody | 93.1, 99.1 (FINDDx / MUHC independent evaluation)                                  | 2.6% (1.2-3.8%)                                  |
| Iversen (University of Copenhagen) <sup>44</sup>       | 2020-04-15 to 2020-04-22 | Capital Region of Denmark   | Regional         | Low                  | 28792       | Mean 44.4 (SD 12.6)                                                        | 78.9       | Entire sample          | Health care workers and caregivers             | 4.0% (3.8-4.3%)                                      | Livzon Diagnostics   Not Reported   IgM; IgG                                                    | 80.4, 100.0 (FINDDx / MUHC independent evaluation)                                 | 4.0% (2.5-5.4%)                                  |
| <b>France</b>                                          |                          |                             |                  |                      |             |                                                                            |            |                        |                                                |                                                      |                                                                                                 |                                                                                    |                                                  |
| Mesnil (Rothschild Foundation Hospital) <sup>189</sup> | 2020-06-06 to 2020-06-22 | Paris   Paris               | Sublocal         | High                 | 646         | Mean 39 (Range 28-50)                                                      | 73.1       | Convenience            | Health care workers and caregivers             | 12.0% (9.6-14.8%)                                    | Roche   Elecsys Anti-SARS-CoV-2 Roche COBAS 6000   IgG                                          | 99.5, 99.8 (Test developer / manufacturer evaluation)                              | 10.5% (7.0-14.5%)                                |
| Fumery (Picardie University) <sup>190</sup>            | 2020-03-25 to 2020-05-11 | Somme   Amiens              | Sublocal         | High                 | 146         | Median 38 (Range 17-81)                                                    | 49.3       | Convenience            | Patients seeking care for non-COVID-19 reasons | 4.8% (2.0-9.6%)                                      | DiaSorin   Liaison® SARS-CoV-2 S1/S2 IgG   IgG                                                  | 97.8, 97.8 (Used Bastos SR/MA data; no sens, spec, or author adjustment available) | 3.4% (0.1-6.1%)                                  |
| Solodky (Centre Leon Berard) <sup>191</sup>            | 2020-03-01 to            | Auvergne-Rhone-Alpes   Lyon | Sublocal         | High                 | 244         | NR                                                                         | nan        | Sequential             | Patients seeking care for non-                 | 5.3% (2.9-8.9%)                                      | TODA Pharma   TODA Coronadiag   IgG; IgM                                                        | 100.0, 100.0 (Test developer /                                                     | 4.7% (1.8-7.8%)                                  |

| Article Author (Study Organization)                    | Sampling Dates (YMD)     | Location                    | Geographic Scope | Overall Risk of Bias | Sample Size | Age                                                                            | Female (%) | Sampling method | Sample Frame                       | Uncorrected Seroprevalence (95% Confidence Interval) | Test Manufacturers   Names   Isotypes                       | Test Sens, Spec (Source)                                | Corrected Seroprevalence (90% Credible Interval) |
|--------------------------------------------------------|--------------------------|-----------------------------|------------------|----------------------|-------------|--------------------------------------------------------------------------------|------------|-----------------|------------------------------------|------------------------------------------------------|-------------------------------------------------------------|---------------------------------------------------------|--------------------------------------------------|
|                                                        | 2020-04-16               |                             |                  |                      |             |                                                                                |            |                 | COVID-19 reasons                   |                                                      |                                                             | manufacturer evaluation)                                |                                                  |
| Solodky (Centre Leon Berard) <sup>191</sup>            | 2020-03-01 to 2020-04-16 | Auvergne-Rhone-Alpes   Lyon | Sublocal         | High                 | 85          | NR                                                                             | nan        | Self-referral   | Health care workers and caregivers | 5.9% (1.9-13.2%)                                     | TODA Pharma   TODA Coronadiag   IgG; IgM                    | 100.0, 100.0 (Test developer / manufacturer evaluation) | 4.9% (0.5-8.9%)                                  |
| <b>Germany</b>                                         |                          |                             |                  |                      |             |                                                                                |            |                 |                                    |                                                      |                                                             |                                                         |                                                  |
| Epstude (Thuringia Clinic) <sup>192</sup>              | 2020-06-15 to 2020-06-30 | Thuringia                   | Sublocal         | High                 | 20          | Mean 39.4 (SD 10.2)                                                            | 70.0       | Convenience     | Health care workers and caregivers | 5.0% (0.1-24.9%)                                     | PerkinElmer Inc   Euroimmun Anti-SARS-CoV-2 ELISA IgG   IgG | 42.9, 98.0 (FINDDx / MUHC independent evaluation)       | 20.1% (0.0-42.1%)                                |
| Epstude (Thuringia Clinic) <sup>192</sup>              | 2020-06-15 to 2020-06-30 | Thuringia                   | Sublocal         | High                 | 45          | Mean 47.8 (SD 10.4)                                                            | 86.7       | Convenience     | Health care workers and caregivers | 0.0% (0.0-7.9%)                                      | PerkinElmer Inc   Euroimmun Anti-SARS-CoV-2 ELISA IgG   IgG | 42.9, 98.0 (FINDDx / MUHC independent evaluation)       | -                                                |
| Armann (Technische Universität Dresden) <sup>193</sup> | 2020-05-25 to 2020-06-30 | Saxony                      | Regional         | High                 | 2045        | Median 15 (students); 51 (teachers) (Range 14-16 (students); 37-57 (teachers)) | 56.7       | Convenience     | Multiple populations               | 0.6% (0.3-1.0%)                                      | DiaSorin LIAISON   Liaison® SARS- CoV-2 S1/S2 IgG   IgG     | 80.8, 96.0 (FINDDx / MUHC independent evaluation)       | 0.2% (0.0-0.4%)                                  |
| Zöllkau (Universitätsklinikum Jena) <sup>194</sup>     | 2020-04-06 to 2020-05-13 | Thuringia                   | Local            | High                 | 217         | NR                                                                             | 82.9       | Unclear         | Pregnant or parturient women       | 0.6% (0.0-2.8%)                                      | Epitope Diagnostics   Not Reported   IgG                    | 80.8, 100.0 (FINDDx / MUHC independent evaluation)      | 0.9% (0.0-2.0%)                                  |
| Schmidt (University of Hannover) <sup>195</sup>        | 2020-04-20 to 2020-04-30 | Lower Saxony   Hannover     | Sublocal         | High                 | 385         | 18-29 (n=55); 30-49 (n=154); 50-64 (n=170); >=65 (n=6)                         | 80.0       | Convenience     | Health care workers and caregivers | 2.9% (1.4-5.1%)                                      | EUROIMMUN   Euroimmun Anti-SARS-CoV-2 ELISA IgG   IgG       | 76.9, 97.0 (FINDDx / MUHC independent evaluation)       | 1.5% (0.0-3.2%)                                  |
| Korth (University Hospital Essen) <sup>196</sup>       | 2020-03-25 to 2020-04-21 | North Rhine   Essen         | Sublocal         | High                 | 316         | Mean 36.7 (Average age of high-risk group); 42.3                               | 64.6       | Convenience     | Health care workers and caregivers | 1.6% (0.5-3.7%)                                      | EUROIMMUN   Euroimmun Anti-SARS-CoV-2-IgG   IgG             | 76.9, 97.0 (FINDDx / MUHC independent evaluation)       | 1.0% (0.0-2.2%)                                  |

| Article Author (Study Organization)                    | Sampling Dates (YMD)     | Location             | Geographic Scope | Overall Risk of Bias | Sample Size | Age                                                                                                                             | Female (%) | Sampling method | Sample Frame                       | Uncorrected Seroprevalence (95% Confidence Interval) | Test Manufacturers   Names   Isotypes                     | Test Sens, Spec (Source)                                                           | Corrected Seroprevalence (90% Credible Interval) |
|--------------------------------------------------------|--------------------------|----------------------|------------------|----------------------|-------------|---------------------------------------------------------------------------------------------------------------------------------|------------|-----------------|------------------------------------|------------------------------------------------------|-----------------------------------------------------------|------------------------------------------------------------------------------------|--------------------------------------------------|
|                                                        |                          |                      |                  |                      |             | (Average age of low-risk group) (SD 10.7 (SD of high-risk group); 13.2 (SD of low-risk group))                                  |            |                 |                                    |                                                      |                                                           |                                                                                    |                                                  |
| Harsch (Thuringia Clinic) <sup>197</sup>               | 2020-04-16 to 2020-04-21 | Thuringia   Saalfeld | Sublocal         | High                 | 18          | Mean 44.9 (Range 21-60)                                                                                                         | nan        | Convenience     | Health care workers and caregivers | 0.0% (0.0-18.5%)                                     | EUROIMMUN   EUROIMMUN™   IgG                              | 42.9, 98.0 (FINDDx / MUHC independent evaluation)                                  | -                                                |
| Behrens (Hannover Medical School) <sup>198,199</sup>   | 2020-03-23 to 2020-04-17 | Lower Saxony         | Local            | High                 | 217         | Mean 36.5 (Range 18-63)                                                                                                         | 65.0       | Self-referral   | Health care workers and caregivers | 1.4% (0.3-4.0%)                                      | EUROIMMUN   Euroimmun Anti-SARS-CoV-2 ELISA IgG   IgG     | 87.2, 99.3 (Test developer / manufacturer evaluation)                              | 1.0% (0.0-2.2%)                                  |
| Kern (Universitätsmedizin Marburg) <sup>200</sup>      | 2020-04-09 to 2020-04-16 |                      | Sublocal         | High                 | 1780        | 10-19 (n=52, 2.9%), 20-29 (n=422, 23.7%), 30-39 (n=378, 21.2%), 40-49 (n=347, 19.5%), 50-59 (n=431, 24.2%), 60-69 (n=150, 8.4%) | 79.8       | Unclear         | Multiple populations               | 1.0% (0.6-1.5%)                                      | EUROIMMUN   Euroimmun Anti-SARS-CoV-2 IgG IgA ELISA   IgG | 76.9, 97.0 (FINDDx / MUHC independent evaluation)                                  | 0.4% (0.0-0.8%)                                  |
| Kraehling (Goethe-University Frankfurt) <sup>201</sup> | 2020-04-06 to 2020-04-14 | Hesse   Frankfurt    | Local            | Moderate             | 998         | <30 (n=115); 30-40 (n=172); 41-50 (n=213); 51-60 (n=399); >60 (n=101)                                                           | 21.5       | Self-referral   | Essential non-healthcare workers   | 0.4% (0.1-1.0%)                                      | Author-designed   N/A - Author-designed   IgG             | 75.6, 97.6 (Used Bastos SR/MA data; no sens, spec, or author adjustment available) | 0.2% (0.0-0.4%)                                  |
| Lackermair (University Hospital Munich) <sup>202</sup> | 2020-04-02 to 2020-04-06 | Bavaria              | Regional         | High                 | 151         | Mean 38 (Range 26-47)                                                                                                           | 83.4       | Convenience     | Health care workers and caregivers | 2.6% (0.7-6.6%)                                      | EUROIMMUN   Euroimmun Anti-SARS-CoV-2 ELISA IgG   IgG     | 42.9, 98.0 (FINDDx / MUHC independent evaluation)                                  | 3.8% (0.0-8.0%)                                  |
| <b>Greece</b>                                          |                          |                      |                  |                      |             |                                                                                                                                 |            |                 |                                    |                                                      |                                                           |                                                                                    |                                                  |

| Article Author (Study Organization)                                        | Sampling Dates (YMD)     | Location         | Geographic Scope | Overall Risk of Bias | Sample Size | Age                                                                                                                                                                                                                          | Female (%) | Sampling method | Sample Frame                                   | Uncorrected Seroprevalence (95% Confidence Interval) | Test Manufacturers   Names   Isotypes                               | Test Sens, Spec (Source)                                                           | Corrected Seroprevalence (90% Credible Interval) |
|----------------------------------------------------------------------------|--------------------------|------------------|------------------|----------------------|-------------|------------------------------------------------------------------------------------------------------------------------------------------------------------------------------------------------------------------------------|------------|-----------------|------------------------------------------------|------------------------------------------------------|---------------------------------------------------------------------|------------------------------------------------------------------------------------|--------------------------------------------------|
| Psichogiou (National and Kapodistrian University of Athens) <sup>203</sup> | 2020-04-13 to 2020-05-15 | Attica   Athens  | Local            | Moderate             | 1495        | Mean 46.4 (NR)                                                                                                                                                                                                               | 69.7       | Convenience     | Health care workers and caregivers             | 1.1% (0.6-1.7%)                                      | Genebody Inc.   GeneBody COVID-19 IgM/IgG detection   IgG; IgM      | 87.0, 100.0 (Used author-adjusted estimate)                                        | 1.1% (0.7-1.6%)                                  |
| <b>Italy</b>                                                               |                          |                  |                  |                      |             |                                                                                                                                                                                                                              |            |                 |                                                |                                                      |                                                                     |                                                                                    |                                                  |
| Norsa (Papa Giovanni XXII) <sup>204</sup>                                  | 2020-03-04 to 2020-07-10 | Lombardy         | Sublocal         | High                 | 90          | <28 (n=32); 38-47 (n=27); >47 (n=31)                                                                                                                                                                                         | 46.7       | Convenience     | Patients seeking care for non-COVID-19 reasons | 21.1% (13.2-31.0%)                                   | VivaChek   VivaDiag COVID-19 IgM/IgG Rapid Test   IgG; IgM          | 65.3, 94.9 (FINDDx / MUHC independent evaluation)                                  | 25.0% (12.1-39.5%)                               |
| Cosma (University of Turin) <sup>205</sup>                                 | 2020-04-16 to 2020-06-04 | Piedmont   Turin | Local            | High                 | 138         | NR                                                                                                                                                                                                                           | 100.0      | Sequential      | Pregnant or parturient women                   | 5.8% (2.5-11.1%)                                     | Boditech   AFIAS™ COVID-19   IgG                                    | 66.0, 96.6 (Used Bastos SR/MA data; no sens, spec, or author adjustment available) | 4.3% (0.0-8.2%)                                  |
| Lorenzo (Santagostino Medical Center) <sup>206</sup>                       | 2020-05-02 to 2020-05-31 | Lombardy   Milan | Local            | High                 | 119         | Mean 47 (healthcare workers); 79 (family member old); 42 (family member middle age); 11 (family member youth) (SD 18 (health care workers); 6 (family member old); 12 (family member middle age); 7 (family member young); ) | 54.6       | Convenience     | Multiple populations                           | 42.6% (33.6-52.0%)                                   | Prima Lab   IgM/IgG serological rapid tests   IgM; IgG              | 79.1, 85.4 (FINDDx / MUHC independent evaluation)                                  | 45.7% (27.5-64.2%)                               |
| Cavaliere (Santo Stefano Hospital) <sup>207</sup>                          | 2020-04-04 to 2020-05-16 | Tuscany          | Local            | High                 | 134         | NR                                                                                                                                                                                                                           | 100.0      | Sequential      | Pregnant or parturient women                   | 4.5% (1.7-9.5%)                                      | Acro Biotech Inc.   COVID-19 IgG/IgM Rapid Test Cassette   IgG; IgM | 37.0, 93.7 (FINDDx / MUHC independent evaluation)                                  | 6.9% (0.0-15.8%)                                 |



| Article Author (Study Organization)                            | Sampling Dates (YMD)     | Location                                                | Geographic Scope | Overall Risk of Bias | Sample Size | Age                     | Female (%) | Sampling method | Sample Frame                                   | Uncorrected Seroprevalence (95% Confidence Interval) | Test Manufacturers   Names   Isotypes                                                                                                                                                            | Test Sens, Spec (Source)                                                           | Corrected Seroprevalence (90% Credible Interval) |
|----------------------------------------------------------------|--------------------------|---------------------------------------------------------|------------------|----------------------|-------------|-------------------------|------------|-----------------|------------------------------------------------|------------------------------------------------------|--------------------------------------------------------------------------------------------------------------------------------------------------------------------------------------------------|------------------------------------------------------------------------------------|--------------------------------------------------|
| Sandri (Humanitas Clinical and Research Center) <sup>208</sup> | 2020-04-28 to 2020-05-16 | Lombardy   Milan, Rozzano, Varese, Castellanza, Bergamo | Regional         | Moderate             | 3985        | Median 42 (Range 21-86) | 66.8       | Self-referral   | Health care workers and caregivers             | 13.1% (12.1-14.2%)                                   | DiaSorin   Liaison® SARS- CoV-2 S1/S2 IgG   IgG                                                                                                                                                  | 80.8, 96.0 (FINDDx / MUHC independent evaluation)                                  | 9.9% (4.2-15.6%)                                 |
| Denina (University of Turin) <sup>209</sup>                    | 2020-03-08 to 2020-04-30 |                                                         | Local            | High                 | 24          | Mean 13 (Range 6-17)    | 66.7       | Convenience     | Patients seeking care for non-COVID-19 reasons | 12.5% (2.7-32.4%)                                    | DiaSorin   Liaison® SARS- CoV-2 S1/S2 IgG   IgG                                                                                                                                                  | 97.8, 97.8 (Used Bastos SR/MA data; no sens, spec, or author adjustment available) | 13.8% (2.3-24.3%)                                |
| Vena (University of Genoa) <sup>210</sup>                      | 2020-03-01 to 2020-04-30 | Lombardy, Liguria                                       | Regional         | High                 | 3609        | Median 51 (IQR 41-63)   | 55.6       | Convenience     | Patients seeking care for non-COVID-19 reasons | 11.0% (10.0-12.1%)                                   | Maglumi; Realy-Tech; Biosynex   MAGLUMI800TM 2019- nCoV IgG (Cat. Ref. 130219015M) and IgM (130219016M); Realy-Tech 2019 nCOV/COVID-19 IgG/IgM Rapid Test; Biosynex COVID-19 BSS test   IgG; IgM | 66.0, 96.6 (Used Bastos SR/MA data; no sens, spec, or author adjustment available) | 12.1% (10.5-13.8%)                               |
| Carozzi (Arezzo Hospital) <sup>211</sup>                       | 2020-04-01 to 2020-04-30 | Tuscany                                                 | Regional         | High                 | 6059        | NR                      | nan        | Convenience     | Health care workers and caregivers             | 2.2% (1.8-2.6%)                                      | Zhejiang Orient Gene Biotech Co., LTD   COVID-19 IgG / IgM Rapid Test Cassette   IgG; IgM                                                                                                        | 43.4, 97.7 (FINDDx / MUHC independent evaluation)                                  | 1.7% (0.0-3.4%)                                  |
| Carozzi (Arezzo Hospital) <sup>211</sup>                       | 2020-04-01 to 2020-04-30 | Tuscany                                                 | Regional         | High                 | 5456        | NR                      | nan        | Convenience     | Health care workers and caregivers             | 5.2% (4.6-5.8%)                                      | Screen Italia S.R.L   Screen Test COVID-19 2019-nCoV IgG/IgM   IgG; IgM                                                                                                                          | 99.0, 88.0 (Author-reported independent evaluation)                                | -                                                |
| Carozzi (Arezzo Hospital) <sup>211</sup>                       | 2020-04-01 to 2020-04-30 | Tuscany                                                 | Regional         | High                 | 652         | NR                      | nan        | Convenience     | Health care workers and caregivers             | 2.0% (1.1-3.4%)                                      | Zhejiang Orient Gene Biotech Co., LTD   COVID-19 IgG / IgM Rapid Test Cassette   IgG; IgM                                                                                                        | 43.4, 97.7 (FINDDx / MUHC independent evaluation)                                  | 2.0% (0.0-4.1%)                                  |
| Carozzi (Arezzo Hospital) <sup>211</sup>                       | 2020-04-01 to 2020-04-30 | Tuscany                                                 | Regional         | High                 | 1193        | NR                      | nan        | Convenience     | Health care workers and caregivers             | 3.9% (2.9-5.2%)                                      | Zhejiang Orient Gene Biotech Co., LTD   COVID-19 IgG / IgM Rapid Test Cassette   IgG; IgM                                                                                                        | 43.4, 97.7 (FINDDx / MUHC independent evaluation)                                  | 4.2% (0.0-7.7%)                                  |

| Article Author (Study Organization)                      | Sampling Dates (YMD)     | Location           | Geographic Scope | Overall Risk of Bias | Sample Size | Age                                                                  | Female (%) | Sampling method | Sample Frame                       | Uncorrected Seroprevalence (95% Confidence Interval) | Test Manufacturers   Names   Isotypes                                                     | Test Sens, Spec (Source)                            | Corrected Seroprevalence (90% Credible Interval) |
|----------------------------------------------------------|--------------------------|--------------------|------------------|----------------------|-------------|----------------------------------------------------------------------|------------|-----------------|------------------------------------|------------------------------------------------------|-------------------------------------------------------------------------------------------|-----------------------------------------------------|--------------------------------------------------|
| Carozzi (Arezzo Hospital) <sup>211</sup>                 | 2020-04-01 to 2020-04-30 | Tuscany            | Regional         | High                 | 3518        | NR                                                                   | nan        | Convenience     | Health care workers and caregivers | 1.6% (1.2-2.1%)                                      | Zhejiang Orient Gene Biotech Co., LTD   COVID-19 IgG / IgM Rapid Test Cassette   IgG; IgM | 43.4, 97.7 (FINDDx / MUHC independent evaluation)   | 1.2% (0.0-2.5%)                                  |
| Carozzi (Arezzo Hospital) <sup>211</sup>                 | 2020-04-01 to 2020-04-30 | Tuscany            | Regional         | High                 | 220         | NR                                                                   | nan        | Convenience     | Health care workers and caregivers | 1.8% (0.5-4.6%)                                      | Zhejiang Orient Gene Biotech Co., LTD   COVID-19 IgG / IgM Rapid Test Cassette   IgG; IgM | 43.4, 97.7 (FINDDx / MUHC independent evaluation)   | 2.3% (0.0-5.0%)                                  |
| Volta (University of Brescia) <sup>212</sup>             | 2020-04-27 to 2020-04-27 | Lombardy           | Sublocal         | High                 | 76          | Median 46 (IQR 23-69)                                                | 75.0       | Convenience     | Health care workers and caregivers | 11.8% (5.5-21.2%)                                    | DiaSorin   Not Reported   IgG                                                             | 80.8, 96.0 (FINDDx / MUHC independent evaluation)   | 8.8% (0.2-16.1%)                                 |
| Lahner (University of Rome) <sup>213</sup>               | 2020-04-07 to 2020-04-27 | Lazio   Rome       | Sublocal         | High                 | 1084        | Median 46 (Range 19-69)                                              | 60.9       | Convenience     | Health care workers and caregivers | 0.7% (0.3-1.4%)                                      | Medical Systems   2019-nCoV IgM/IgG CLIA   IgG                                            | 50.0, 99.1 (Author-reported independent evaluation) | 0.5% (0.0-1.1%)                                  |
| Landro (Hospital of Bergamo) <sup>59</sup>               | Until 2020-04-24         | Lombardy   Bergamo | Sublocal         | Unclear              | 3000        | NR                                                                   | nan        | Unclear         | Health care workers and caregivers | 13.0% (11.8-14.3%)                                   | Not reported   Not Reported   Not reported                                                | No data                                             | -                                                |
| Paradiso (Istituto Tumori G. Paolo II) <sup>214</sup>    | 2020-03-26 to 2020-04-17 | Puglia   Bari      | Sublocal         | High                 | 606         | Median 47.5 (Range 20-73)                                            | 60.6       | Convenience     | Health care workers and caregivers | 0.3% (0.0-1.2%)                                      | Snibe Diagnostic   MAGLUMI800TM   IgG                                                     | 71.0, 98.0 (FINDDx / MUHC independent evaluation)   | 0.3% (0.0-0.7%)                                  |
| Sotgiu (Università degli Studi di Milano) <sup>215</sup> | 2020-04-02 to 2020-04-16 | Lombardy           | Local            | High                 | 202         | 20-29 (n=27); 30-39 (n=44); 40-49 (n=57); 50-59 (n=51); 60-69 (n=23) | 65.3       | Convenience     | Health care workers and caregivers | 7.4% (4.2-11.9%)                                     | BioMedomics   BioMedomics IgM-IgG Combined Antibody Rapid Test   IgG                      | 55.5, 96.3 (FINDDx / MUHC independent evaluation)   | 7.0% (0.0-12.5%)                                 |
| Amendola (University of Milan) <sup>216</sup>            | 2020-04-15 to 2020-04-15 | Lombardy           | Sublocal         | High                 | 663         | Median 44 (NR)                                                       | 83.7       | Convenience     | Health care workers and caregivers | 5.1% (3.6-7.1%)                                      | EUROIMMUN   Euroimmun Anti-SARS-CoV-2 ELISA IgG   IgG                                     | 76.9, 97.0 (FINDDx / MUHC independent evaluation)   | 2.8% (0.0-5.3%)                                  |

| Article Author (Study Organization)                                         | Sampling Dates (YMD)     | Location                | Geographic Scope | Overall Risk of Bias | Sample Size | Age                                                         | Female (%) | Sampling method            | Sample Frame                                   | Uncorrected Seroprevalence (95% Confidence Interval) | Test Manufacturers   Names   Isotypes                                                   | Test Sens, Spec (Source)                               | Corrected Seroprevalence (90% Credible Interval) |
|-----------------------------------------------------------------------------|--------------------------|-------------------------|------------------|----------------------|-------------|-------------------------------------------------------------|------------|----------------------------|------------------------------------------------|------------------------------------------------------|-----------------------------------------------------------------------------------------|--------------------------------------------------------|--------------------------------------------------|
| Fusco (D. Cotugno' Hospital) <sup>217</sup>                                 | 2020-03-23 to 2020-04-02 | Campania   Naples       | Sublocal         | High                 | 115         | Median 43 (IQR 32-51.5)                                     | 48.7       | Convenience                | Health care workers and caregivers             | 1.7% (0.2-6.1%)                                      | Snibe Diagnostic   MAGLUMI 2019-nCoV IgG (CLIA)   IgG                                   | 73.0, 99.0 (FINDDx / MUHC independent evaluation)      | 2.6% (0.0-5.4%)                                  |
| Pancrazzi (Ospedale San Donato) <sup>218</sup>                              | 2020-03-17 to 2020-03-21 | Tuscany                 | Local            | High                 | 516         | Mean 53.7 years (NR)                                        | 54.5       | Sequential                 | Patients seeking care for non-COVID-19 reasons | 13.0% (10.2-16.2%)                                   | Acro Biotech Inc.   Acro Biotech COVID-19 Rapid Test   IgG; IgM                         | 37.0, 93.7 (FINDDx / MUHC independent evaluation)      | 29.5% (7.4-50.1%)                                |
| <b>Japan</b>                                                                |                          |                         |                  |                      |             |                                                             |            |                            |                                                |                                                      |                                                                                         |                                                        |                                                  |
| Chong (Kanenokuma Hospital) <sup>219</sup>                                  | 2020-06-12 to 2020-06-15 | Kyushu                  | Sublocal         | High                 | 108         | NR                                                          | nan        | Convenience                | Multiple populations                           | 2.8% (0.6-7.9%)                                      | Hangzhou Alltest Biotech Co. Ltd.   All Test@2019-nCoV IgG/IgM RapidTest Cassette   IgG | 59.9, 100.0 (FINDDx / MUHC independent evaluation)     | 5.0% (0.1-9.3%)                                  |
| Suda (Hokkaido University Graduate School of Medicine) <sup>220</sup>       | 2020-05-01 to 2020-05-31 | Hokkaido                | Sublocal         | High                 | 300         | Mean 66.5 (Range 20-84)                                     | 42.0       | Unclear                    | Patients seeking care for non-COVID-19 reasons | 0.0% (0.0-1.2%)                                      | Roche Diagnostics   Elecsys Anti-SARS-Cov2 Immunoassay   IgG                            | 83.9, 100.0 (FINDDx / MUHC independent evaluation)     | 0.3% (0.0-0.9%)                                  |
| Nakamura (Iwate Prefectural Central Hospital) <sup>221</sup>                | 2020-05-18 to 2020-05-29 | Honshu   Iwate          | Local            | High                 | 1000        | Mean 40 (SD 11)                                             | 73.6       | Convenience                | Health care workers and caregivers             | 0.0% (0.0-0.4%)                                      | Roche elecsys   Roche Elecsys® Anti-SARS-CoV-2 RUO Assay   IgM; IgG                     | 83.9, 100.0 (FINDDx / MUHC independent evaluation)     | 0.1% (0.0-0.3%)                                  |
| Jiji (SoftBank) <sup>222,223</sup>                                          | 2020-05-12 to 2020-05-18 |                         | Sublocal         | Unclear              | 44066       | NR                                                          | nan        | Convenience                | Multiple populations                           | 0.4% (0.4-0.5%)                                      | Innovita; Zhejiang Orient Gene Biotech Co., LTD   Not Reported   Not reported           | No data                                                | -                                                |
| Fujita (National Hospital Organization Kyoto Medical Center) <sup>224</sup> | 2020-04-10 to 2020-04-20 | Kansai   Kyoto          | Sublocal         | High                 | 92          | 20-29 (n=30); 30-39 (n=29); 40-49 (n=21); >=50 (n=12)       | 64.1       | Stratified non-probability | Health care workers and caregivers             | 5.4% (1.8-12.2%)                                     | DRG International   COVID-19 IgG ELISA kits   IgG                                       | 83.3, 100.0 (FINDDx / MUHC independent evaluation)     | 5.1% (0.3-9.4%)                                  |
| Doi (Kobe City Medical Center General Hospital) <sup>225</sup>              | 2020-03-31 to 2020-04-07 | Hyogo Prefecture   Kobe | Local            | High                 | 1000        | 0-10 (n=81); 0-19 (n=27); 20-29 (n=36); 30-39 (n=90); 40-49 | 51.1       | Simplified probability     | Patients seeking care for non-COVID-19 reasons | 2.7% (1.8-3.9%)                                      | Kurabo Industries   SARS-CoV-2 Antibody Testing Kit IgG (RC - NC002)   IgG              | 76.4, 100.0 (Test developer / manufacturer evaluation) | 2.8% (0.6-4.7%)                                  |

| Article Author (Study Organization)                                   | Sampling Dates (YMD)     | Location                | Geographic Scope | Overall Risk of Bias | Sample Size | Age                                                                                                                              | Female (%) | Sampling method | Sample Frame                                   | Uncorrected Seroprevalence (95% Confidence Interval) | Test Manufacturers   Names   Isotypes                        | Test Sens, Spec (Source)                                      | Corrected Seroprevalence (90% Credible Interval) |
|-----------------------------------------------------------------------|--------------------------|-------------------------|------------------|----------------------|-------------|----------------------------------------------------------------------------------------------------------------------------------|------------|-----------------|------------------------------------------------|------------------------------------------------------|--------------------------------------------------------------|---------------------------------------------------------------|--------------------------------------------------|
|                                                                       |                          |                         |                  |                      |             | (n=155); 50-59 (n=164); 60-69 (n=171); 70-79 (n=166); 80-89 (n=164); >=90 (n=19)                                                 |            |                 |                                                |                                                      |                                                              |                                                               |                                                  |
| Suda (Hokkaido University Graduate School of Medicine) <sup>220</sup> | 2020-03-01 to 2020-03-31 | Hokkaido                | Sublocal         | High                 | 300         | Mean 68 (Range 20-80)                                                                                                            | 49.0       | Unclear         | Patients seeking care for non-COVID-19 reasons | 0.3% (0.0-1.8%)                                      | Roche Diagnostics   Elecsys Anti-SARS-Cov2 Immunoassay   IgG | 83.9, 100.0 (FINDDx / MUHC independent evaluation)            | 0.3% (0.0-0.9%)                                  |
| <b>Netherlands</b>                                                    |                          |                         |                  |                      |             |                                                                                                                                  |            |                 |                                                |                                                      |                                                              |                                                               |                                                  |
| Westerhuis (Erasmus Medical Centre) <sup>226</sup>                    | 2020-04-03 to 2020-04-07 |                         | Sublocal         | High                 | 729         | 6-12 months (n=17); 1-2 (n=14); 2-5 (n=24); 5-10 (n=34); 10-20 (n=139); 20-40 (n=140); 40-60 (n=140); 60-80 (n=139); 80+ (n=82)  | nan        | Convenience     | Patients seeking care for non-COVID-19 reasons | 2.3% (1.3-3.7%)                                      | Author-designed   N/A - Author-designed   IgG                | No data                                                       | -                                                |
| Westerhuis (Erasmus Medical Centre) <sup>226</sup>                    | 2020-03-02 to 2020-03-06 |                         | Sublocal         | High                 | 879         | 6-12 months (n=41); 1-2 (n=75); 2-5 (n=42); 5-10 (n=96); 10-20 (n=131); 20-40 (n=131); 40-60 (n=134); 60-80 (n=124); 80+ (n=105) | nan        | Convenience     | Patients seeking care for non-COVID-19 reasons | 0.1% (0.0-0.6%)                                      | Author-designed   N/A - Author-designed   IgG                | No data                                                       | -                                                |
| <b>Norway</b>                                                         |                          |                         |                  |                      |             |                                                                                                                                  |            |                 |                                                |                                                      |                                                              |                                                               |                                                  |
| Cox (University of Bergen) <sup>227</sup>                             | 2020-02-28 to 2020-04-04 | Western Norway   Bergen | Local            | High                 | 77          | NR                                                                                                                               | nan        | Entire sample   | Contacts of COVID patients                     | 31.0% (20.9-42.6%)                                   | Amant et al.   N/A - Author-designed   IgM; IgG; IgA         | 75.6, 97.6 (Used Bastos SR/MA data; no sens, spec, or author) | 38.2% (26.5-49.6%)                               |

| Article Author (Study Organization)                                      | Sampling Dates (YMD)     | Location                     | Geographic Scope | Overall Risk of Bias | Sample Size | Age                     | Female (%) | Sampling method | Sample Frame                                   | Uncorrected Seroprevalence (95% Confidence Interval) | Test Manufacturers   Names   Isotypes                              | Test Sens, Spec (Source)                                      | Corrected Seroprevalence (90% Credible Interval) |
|--------------------------------------------------------------------------|--------------------------|------------------------------|------------------|----------------------|-------------|-------------------------|------------|-----------------|------------------------------------------------|------------------------------------------------------|--------------------------------------------------------------------|---------------------------------------------------------------|--------------------------------------------------|
|                                                                          |                          |                              |                  |                      |             |                         |            |                 |                                                |                                                      |                                                                    | adjustment available)                                         |                                                  |
| <b>Republic of Korea</b>                                                 |                          |                              |                  |                      |             |                         |            |                 |                                                |                                                      |                                                                    |                                                               |                                                  |
| Song (Daegu Catholic University Hospital) <sup>228</sup>                 | 2020-05-25 to 2020-06-05 | North Gyeongsang             | Local            | High                 | 198         | Mean 51.7 (Range 18-82) | 50.0       | Convenience     | Patients seeking care for non-COVID-19 reasons | 7.6% (4.3-12.2%)                                     | Shin Jin Medics Inc   DIAKEY COVID-19 IgM/IgG Rapid Test Kit   IgG | 100.0, 92.0 (Author-reported independent evaluation)          | 2.7% (0.0-5.6%)                                  |
| <b>Singapore</b>                                                         |                          |                              |                  |                      |             |                         |            |                 |                                                |                                                      |                                                                    |                                                               |                                                  |
| Kurohi (Singapore National Centre for Infectious Diseases) <sup>73</sup> | 2020-02-15 to 2020-04-15 | Singapore                    | Sublocal         | Unclear              | 1096        | NR                      | nan        | Unclear         | Health care workers and caregivers             | 0.0% (0.0-0.3%)                                      | Not reported   Not Reported   Not reported                         | No data                                                       | -                                                |
| <b>Spain</b>                                                             |                          |                              |                  |                      |             |                         |            |                 |                                                |                                                      |                                                                    |                                                               |                                                  |
| Fernández-Rivas (Institut Catala de la Salut) <sup>229</sup>             | 2020-05-04 to 2020-05-22 | Catalonia   Barcelona        | Local            | Moderate             | 7563        | Mean 43.81 (SD 12.43)   | 76.0       | Self-referral   | Health care workers and caregivers             | 9.4% (8.8-10.1%)                                     | DiaSorin LIAISON   Liaison® SARS- CoV-2 S1/S2 IgG   IgG            | 80.8, 96.0 (FINDDx / MUHC independent evaluation)             | 5.5% (1.0-9.5%)                                  |
| Soriano (Universidad Autónoma de Madrid) <sup>230</sup>                  | 2020-04-26 to 2020-05-16 | Community of Madrid   Madrid | Local            | High                 | 674         | Median 42 (Range 18-89) | 70.2       | Sequential      | Multiple populations                           | 13.8% (11.3-16.6%)                                   | PCL Inc.   PCL COVID19 IgG/IgM Rapid Gold   IgG; IgM               | 92.9, 96.2 (FINDDx / MUHC independent evaluation)             | 10.1% (5.0-14.9%)                                |
| Fernandez (Hospital Universitario de Fuenlabrada) <sup>231</sup>         | 2020-04-14 to 2020-05-13 |                              | Sublocal         | High                 | 2439        | Mean 42.1 (Range 18-65) | 78.4       | Convenience     | Health care workers and caregivers             | 16.9% (15.4-18.4%)                                   | Snibe Diagnostic   MAGLUMI 2019-nCov IgG/IgM CLIA   IgG            | 93.2, 99.2 (FINDDx / MUHC independent evaluation)             | 16.3% (14.1-18.9%)                               |
| Valdivia (Hospital Clínico Universitario) <sup>232</sup>                 | 2020-04-13 to 2020-04-30 | Valencia                     | Local            | High                 | 1153        | NR                      | nan        | Unclear         | Health care workers and caregivers             | 3.5% (2.5-4.7%)                                      | Snibe Diagnostic   MAGLUMI 2019-nCov IgG/IgM CLIA   IgG; IgM       | 95.6, 96.0 (Test developer / manufacturer evaluation)         | 1.1% (0.0-2.2%)                                  |
| Galan (Hospital Universitario Fundación Alcorcón) <sup>233</sup>         | 2020-04-14 to 2020-04-27 | Community of Madrid   Madrid | Sublocal         | High                 | 2590        | Mean 43.8 (SD 11.1)     | 73.9       | Convenience     | Health care workers and caregivers             | 31.6% (29.8-33.4%)                                   | Diapro   anti-SARS-CoV-2 IgG   IgG                                 | 75.6, 97.6 (Used Bastos SR/MA data; no sens, spec, or author) | 39.8% (37.4-42.4%)                               |

| Article Author (Study Organization)                                                    | Sampling Dates (YMD)     | Location              | Geographic Scope | Overall Risk of Bias | Sample Size | Age                                                                                          | Female (%) | Sampling method        | Sample Frame                       | Uncorrected Seroprevalence (95% Confidence Interval) | Test Manufacturers   Names   Isotypes                                                       | Test Sens, Spec (Source)                              | Corrected Seroprevalence (90% Credible Interval) |
|----------------------------------------------------------------------------------------|--------------------------|-----------------------|------------------|----------------------|-------------|----------------------------------------------------------------------------------------------|------------|------------------------|------------------------------------|------------------------------------------------------|---------------------------------------------------------------------------------------------|-------------------------------------------------------|--------------------------------------------------|
|                                                                                        |                          |                       |                  |                      |             |                                                                                              |            |                        |                                    |                                                      |                                                                                             | adjustment available)                                 |                                                  |
| Olalla ( Hospital Costa del Sol ) <sup>234</sup>                                       | 2020-04-15 to 2020-04-25 |                       | Sublocal         | High                 | 498         | Mean 41.5 (95% CI 40.8-42.3)                                                                 | 71.1       | Self-referral          | Health care workers and caregivers | 2.2% (1.1-3.9%)                                      | Zhejiang Orient Gene Biotech Co., LTD   COVID-19 IgG/IgM Rapid Test   IgG; IgM              | 43.4, 97.7 (FINDDx / MUHC independent evaluation)     | 2.1% (0.0-4.5%)                                  |
| Martin (Gerencia de Atención Primaria del Área de Salud de León, Spain) <sup>235</sup> | 2020-04-01 to 2020-04-15 | León   León           | Local            | High                 | 676         | Mean 48.5 (SD 12.8)                                                                          | 74.1       | Convenience            | Health care workers and caregivers | 5.9% (4.3-8.0%)                                      | Hangzhou All Test Biotech Co Ltd   All Test@2019-nCoV IgG/IgM RapidTest Cassette   IgG; IgM | 100.0, 100.0 (FINDDx / MUHC independent evaluation)   | 5.1% (2.8-7.5%)                                  |
| Garcia-Basteiro (Universitat de Barcelona ) <sup>236</sup>                             | 2020-03-28 to 2020-04-09 | Catalonia   Barcelona | Sublocal         | Moderate             | 578         | Mean 42.1 (SD 11.6)                                                                          | 72.1       | Simplified probability | Health care workers and caregivers | 9.3% (7.1-12.0%)                                     | Author-designed   N/A - Author-designed   IgG; IgM; IgA                                     | 97.0, 98.0 (Test developer / manufacturer evaluation) | 6.2% (1.8-10.3%)                                 |
| <b>Sweden</b>                                                                          |                          |                       |                  |                      |             |                                                                                              |            |                        |                                    |                                                      |                                                                                             |                                                       |                                                  |
| Lidström (Uppsala University) <sup>237</sup>                                           | 2020-05-27 to 2020-06-25 | Uppsala               | Regional         | Moderate             | 8679        | Mean 45 (IgG negative); 42 (IgG positive) (Range 18-85 (IgG negative); 18-78 (IgG positive)) | 76.7       | Entire sample          | Health care workers and caregivers | 6.6% (6.1-7.1%)                                      | Abbott   Abbott Architect SARS-CoV-2 IgG assay   IgG                                        | 41.2, 100.0 (FINDDx / MUHC independent evaluation)    | 15.2% (11.3-19.8%)                               |
| Rudberg (Danderyd Hospital) <sup>238</sup>                                             | 2020-04-14 to 2020-05-08 | Uppland   Stockholm   | Local            | Moderate             | 2149        | Mean 44 (SD 12)                                                                              | 84.5       | Convenience            | Health care workers and caregivers | 19.1% (17.5-20.8%)                                   | Author-designed   Author-designed   IgG                                                     | 99.4, 99.1 (Test developer / manufacturer evaluation) | 18.4% (16.7-20.0%)                               |
| Lindahl (Uppsala University) <sup>239</sup>                                            | 2020-04-01 to 2020-04-20 |                       | Local            | High                 | 1005        | 36-50 (n=133/332); 51-65 (n=116/332)                                                         | 24.3       | Convenience            | Health care workers and caregivers | 23.3% (20.7-26.0%)                                   | Zhejiang Orient Gene Biotech Co Ltd   COVID-19 IgG / IgM Rapid Test Cassette   IgG; IgM     | 43.4, 97.7 (FINDDx / MUHC independent evaluation)     | 55.0% (37.2-72.9%)                               |
| <b>United Kingdom</b>                                                                  |                          |                       |                  |                      |             |                                                                                              |            |                        |                                    |                                                      |                                                                                             |                                                       |                                                  |

| Article Author (Study Organization)                                 | Sampling Dates (YMD)     | Location                    | Geographic Scope | Overall Risk of Bias | Sample Size | Age                         | Female (%) | Sampling method | Sample Frame                       | Uncorrected Seroprevalence (95% Confidence Interval) | Test Manufacturers   Names   Isotypes                                                                                                                                         | Test Sens, Spec (Source)                                                           | Corrected Seroprevalence (90% Credible Interval) |
|---------------------------------------------------------------------|--------------------------|-----------------------------|------------------|----------------------|-------------|-----------------------------|------------|-----------------|------------------------------------|------------------------------------------------------|-------------------------------------------------------------------------------------------------------------------------------------------------------------------------------|------------------------------------------------------------------------------------|--------------------------------------------------|
| Gulraj (Gibraltar Government) <sup>240</sup>                        | 2020-06-03 to 2020-06-17 | Gibraltar                   | Local            | Unclear              | 1247        | NR                          | nan        | Convenience     | Health care workers and caregivers | 1.4% (0.8-2.2%)                                      | Not reported   Not Reported   IgG                                                                                                                                             | No data                                                                            | -                                                |
| Pallett (Chelsea and Westminster Hospital NHS Trust) <sup>241</sup> | 2020-04-08 to 2020-06-12 | England                     | Local            | High                 | 504         | Mean 42.4 (Range 20.3-72.1) | 59.1       | Convenience     | Health care workers and caregivers | 10.6% (8.1-13.6%)                                    | CTK Biotech ; Zhuhai Encode Medical Engineering   Onsite CTK Biotech COVID-19 split IgG/IgM Rapid Test; Encode SARS-CoV-2 split IgM/IgG One Step Rapid Test Device   IgG; IgM | 66.0, 96.6 (Used Bastos SR/MA data; no sens, spec, or author adjustment available) | 11.5% (7.8-15.2%)                                |
| Eyre (Oxford University Hospital) <sup>242</sup>                    | 2020-04-23 to 2020-06-08 | England                     | Local            | Moderate             | 9958        | NR                          | nan        | Convenience     | Health care workers and caregivers | 9.6% (9.0-10.1%)                                     | Abbott   Abbott Architect SARS-CoV-2 IgG assay   IgG                                                                                                                          | 41.2, 100.0 (FINDDx / MUHC independent evaluation)                                 | 22.8% (16.7-28.3%)                               |
| Bampoe (University College London) <sup>243</sup>                   | 2020-05-11 to 2020-06-05 | England                     | Sublocal         | High                 | 200         | Mean 37 (IQR 30-37)         | 83.5       | Unclear         | Health care workers and caregivers | 14.5% (9.9-20.2%)                                    | Abbott   Abbott Architect SARS-CoV-2 IgG assay   IgG                                                                                                                          | 41.2, 100.0 (FINDDx / MUHC independent evaluation)                                 | 35.3% (21.6-48.0%)                               |
| Grant (Whittington Health NHS Trust) <sup>244</sup>                 | 2020-05-15 to 2020-06-05 | England                     | Sublocal         | High                 | 2004        | Mean 40.21 (Range 18-73)    | nan        | Self-referral   | Health care workers and caregivers | 31.6% (29.6-33.7%)                                   | Roche Diagnostics   Elecsys Anti-SARS-Cov2 Immunoassay   IgG; IgM                                                                                                             | 83.9, 100.0 (FINDDx / MUHC independent evaluation)                                 | 38.3% (34.5-42.3%)                               |
| Khalil (St George's University of London) <sup>245</sup>            | 2020-05-15 to 2020-05-28 | England                     | Sublocal         | High                 | 190         | NR                          | nan        | Convenience     | Health care workers and caregivers | 22.0% (16.3-28.6%)                                   | Abbott   Abbott Architect SARS-CoV-2 IgG assay   IgG                                                                                                                          | 41.2, 100.0 (FINDDx / MUHC independent evaluation)                                 | 54.1% (36.5-70.8%)                               |
| Poulikakos (Salford Royal NHS Foundation Trust) <sup>246</sup>      | 2020-05-04 to 2020-05-06 | England   Northwest England | Sublocal         | High                 | 281         | NR                          | 73.0       | Convenience     | Health care workers and caregivers | 6.0% (3.5-9.5%)                                      | Snibe Diagnostic   MAGLUMI 2019-nCoV IgG (CLIA)   IgG                                                                                                                         | 73.0, 99.0 (FINDDx / MUHC independent evaluation)                                  | 5.9% (0.9-10.2%)                                 |
| Shields (University of Birmingham) <sup>247</sup>                   | 2020-04-25 to 2020-04-26 | England   Birmingham        | Local            | High                 | 516         | Median 42 (IQR 30-51)       | 75.2       | Convenience     | Health care workers and caregivers | 24.4% (20.8-28.3%)                                   | University of Birmingham   Not Reported   IgA; IgG; IgM                                                                                                                       | 75.6, 97.6 (Used Bastos SR/MA data; no sens, spec, or author)                      | 29.9% (25.6-34.3%)                               |

| Article Author (Study Organization)                                                       | Sampling Dates (YMD)     | Location                                          | Geographic Scope | Overall Risk of Bias | Sample Size | Age                       | Female (%) | Sampling method | Sample Frame                                   | Uncorrected Seroprevalence (95% Confidence Interval) | Test Manufacturers   Names   Isotypes                                                                                                                                                                                                                                                                                                 | Test Sens, Spec (Source)                                                           | Corrected Seroprevalence (90% Credible Interval) |
|-------------------------------------------------------------------------------------------|--------------------------|---------------------------------------------------|------------------|----------------------|-------------|---------------------------|------------|-----------------|------------------------------------------------|------------------------------------------------------|---------------------------------------------------------------------------------------------------------------------------------------------------------------------------------------------------------------------------------------------------------------------------------------------------------------------------------------|------------------------------------------------------------------------------------|--------------------------------------------------|
|                                                                                           |                          |                                                   |                  |                      |             |                           |            |                 |                                                |                                                      |                                                                                                                                                                                                                                                                                                                                       | adjustment available)                                                              |                                                  |
| Sikora (Rutherford Health) <sup>248</sup>                                                 | 2020-04-14 to 2020-04-24 | England   Reading, Newport, Liverpool, Bedlington | Local            | High                 | 161         | Mean 43 (NR)              | 50.3       | Convenience     | Health care workers and caregivers             | 1.2% (0.2-4.4%)                                      | Sugentech   Sugentech SGTi-flex COVID-19 IgM/IgG   IgG                                                                                                                                                                                                                                                                                | 66.0, 96.6 (Used Bastos SR/MA data; no sens, spec, or author adjustment available) | 1.1% (0.0-2.5%)                                  |
| Public Health England <sup>83</sup>                                                       | 2020-03-26 to 2020-04-08 | England   London                                  | Sublocal         | High                 | 181         | Median 34 (IQR 29-44)     | 67.4       | Convenience     | Health care workers and caregivers             | 45.0% (37.6-52.6%)                                   | Not reported   Not reported   IgG; IgA; IgM                                                                                                                                                                                                                                                                                           | 75.6, 97.6 (Used Bastos SR/MA data; no sens, spec, or author adjustment available) | 57.9% (50.1-66.6%)                               |
| Favara (The Queen Elizabeth Hospital King's Lynn NHS Foundation Trust) <sup>249 250</sup> | 2020-06-01 to 2006-07-20 | England                                           | Sublocal         | High                 | 70          | NR                        | nan        | Unclear         | Health care workers and caregivers             | 21.4% (12.5-32.8%)                                   | Unclear   Luminex SARS-CoV-2 IgG multiplex particle-based flow cytometry assay   IgG                                                                                                                                                                                                                                                  | 84.0, 100.0 (Test developer / manufacturer evaluation)                             | 24.9% (13.7-35.8%)                               |
| <b>United States of America</b>                                                           |                          |                                                   |                  |                      |             |                           |            |                 |                                                |                                                      |                                                                                                                                                                                                                                                                                                                                       |                                                                                    |                                                  |
| McBride (Memorial Sloan Kettering Cancer Center) <sup>251</sup>                           | 2020-05-07 to 2020-06-25 | New York                                          | Sublocal         | High                 | 952         | NR                        | nan        | Convenience     | Patients seeking care for non-COVID-19 reasons | 5.5% (4.1-7.1%)                                      | Abbott   Abbott Architect SARS-CoV-2 IgG assay   IgG                                                                                                                                                                                                                                                                                  | 41.2, 100.0 (FINDDx / MUHC independent evaluation)                                 | 12.3% (7.7-17.4%)                                |
| Muscola (Northwell Health) <sup>252</sup>                                                 | 2020-04-20 to 2020-06-23 | New York   Greater New York City                  | Local            | Moderate             | 40329       | Median 42 (IQR 31.5-54.5) | 73.7       | Convenience     | Health care workers and caregivers             | 13.7% (13.4-14.0%)                                   | EUROIMMUN; Abbott; AnshLabs; Ortho-Clinical Diagnostics; DiaSorin; Roche   Euroimmun SARS-CoV-2 ELISA (IgG); AnshLabs SARS-CoV-2 IgG ELISA; Abbott Architect SARS-CoV-2 IgG assay; Ortho-Diagnostics VITROS anti-SARS-CoV-2 IgG assay; VITROS Anti-SARS-CoV-2 Total Reagent Pack; DiaSorin Liaison; Elecsys Anti-SARS-CoV-2 kit   IgG | 97.8, 97.8 (Used Bastos SR/MA data; no sens, spec, or author adjustment available) | 12.1% (11.5-12.6%)                               |



| Article Author (Study Organization)                                 | Sampling Dates (YMD)     | Location                    | Geographic Scope | Overall Risk of Bias | Sample Size | Age                   | Female (%) | Sampling method | Sample Frame                                   | Uncorrected Seroprevalence (95% Confidence Interval) | Test Manufacturers   Names   Isotypes                                      | Test Sens, Spec (Source)                             | Corrected Seroprevalence (90% Credible Interval) |
|---------------------------------------------------------------------|--------------------------|-----------------------------|------------------|----------------------|-------------|-----------------------|------------|-----------------|------------------------------------------------|------------------------------------------------------|----------------------------------------------------------------------------|------------------------------------------------------|--------------------------------------------------|
| Reifer (Sherman Abrams Laboratory ) <sup>253</sup>                  | 2020-05-15 to 2020-06-15 | New York   New York City    | Local            | Unclear              | 28523       | NR                    | nan        | Unclear         | Patients seeking care for non-COVID-19 reasons | 44.0% (43.4-44.6%)                                   | DiaSorin LIAISON   Liaison® SARS- CoV-2 S1/S2 IgG   IgG                    | 80.8, 96.0 (FINDDx / MUHC independent evaluation)    | 53.8% (43.4-63.9%)                               |
| Brant-Zawadzki (Hoag Memorial Hospital Presbyterian) <sup>254</sup> | 2020-05-15 to 2020-06-15 | California                  | Local            | High                 | 2932        | Mean 42.62 (SD 12.12) | 72.5       | Convenience     | Health care workers and caregivers             | 1.1% (0.7-1.5%)                                      | Ortho-Clinical Diagnostics   VITROS Anti-SARS-CoV-2 IgG Reagent Pack   IgG | 77.4, 99.6 (FINDDx / MUHC independent evaluation)    | 0.8% (0.0-1.3%)                                  |
| Dora (Veterans Affairs Healthcare System) <sup>255</sup>            | 2020-06-05 to 2020-06-12 | California   Los Angeles    | Sublocal         | High                 | 150         | NR                    | nan        | Convenience     | Assisted living and long-term care facilities  | 17.3% (11.6-24.3%)                                   | DiaSorin   DiaSorin Liaison   IgG                                          | 65.0, 100.0 (FINDDx / MUHC independent evaluation)   | 27.0% (15.7-37.6%)                               |
| Flannery (University of Pennsylvania) <sup>256</sup>                | 2020-04-04 to 2020-06-03 | Pennsylvania   Philadelphia | Local            | Moderate             | 1293        | Median 31 (IQR 27-35) | 100.0      | Sequential      | Pregnant or parturient women                   | 6.2% (4.9-7.7%)                                      | Author-designed   N/A - Author-designed   IgG; IgM                         | 100.0, 98.9 (Author-reported independent evaluation) | 5.4% (3.8-6.9%)                                  |
| Gray (Truckee Meadows Fire Protection District) <sup>257</sup>      | 2020-05-01 to 2020-05-31 | Nevada   Washoe County      | Sublocal         | High                 | 132         | NR                    | nan        | Convenience     | Essential non-healthcare workers               | 14.0% (8.6-21.1%)                                    | Not reported   Not Reported   Not reported                                 | No data                                              | -                                                |
| Stavert (Cambridge Health Alliance) <sup>258</sup>                  | 2020-04-13 to 2020-05-24 | Massachusetts               | Sublocal         | High                 | 24          | 11-64                 | 45.8       | Convenience     | Patients seeking care for non-COVID-19 reasons | 0.0% (0.0-14.2%)                                     | DiaSorin   DiaSorin Liaison   IgG                                          | 80.8, 96.0 (FINDDx / MUHC independent evaluation)    | -                                                |
| Staletovich (Coral Springs City Government) <sup>259</sup>          | 2020-05-17 to 2020-05-23 | Florida   Coral Springs     | Local            | Unclear              | 700         | NR                    | nan        | Self-referral   | Essential non-healthcare workers               | 0.0% (0.0-0.5%)                                      | Cellex   Not Reported   Not reported                                       | No data                                              | -                                                |
| Jackson (Michigan Department of Corrections) <sup>260</sup>         | 2020-05-14 to 2020-05-22 | Michigan   Jackson          | Sublocal         | Unclear              | 867         | NR                    | nan        | Convenience     | Persons who are incarcerated                   | 12.0% (9.9-14.4%)                                    | Not reported   Not Reported   Not reported                                 | No data                                              | -                                                |
| Jackson (Michigan Department of Corrections) <sup>260</sup>         | 2020-05-14 to 2020-05-22 | Michigan   Detroit          | Sublocal         | Unclear              | 57          | NR                    | nan        | Convenience     | Persons who are incarcerated                   | 35.0% (22.8-48.8%)                                   | Not reported   Not Reported   Not reported                                 | No data                                              | -                                                |

| Article Author (Study Organization)                         | Sampling Dates (YMD)     | Location                        | Geographic Scope | Overall Risk of Bias | Sample Size | Age                     | Female (%) | Sampling method | Sample Frame                                   | Uncorrected Seroprevalence (95% Confidence Interval) | Test Manufacturers   Names   Isotypes                                                    | Test Sens, Spec (Source)                                                           | Corrected Seroprevalence (90% Credible Interval) |
|-------------------------------------------------------------|--------------------------|---------------------------------|------------------|----------------------|-------------|-------------------------|------------|-----------------|------------------------------------------------|------------------------------------------------------|------------------------------------------------------------------------------------------|------------------------------------------------------------------------------------|--------------------------------------------------|
| Jackson (Michigan Department of Corrections) <sup>260</sup> | 2020-05-14 to 2020-05-22 | Michigan   Lenox Township       | Sublocal         | Unclear              | 1201        | NR                      | nan        | Convenience     | Persons who are incarcerated                   | 66.0% (63.2-68.7%)                                   | Not reported   Not Reported   Not reported                                               | No data                                                                            | -                                                |
| Jackson (Michigan Department of Corrections) <sup>260</sup> | 2020-05-14 to 2020-05-22 | Michigan   Jackson              | Sublocal         | Unclear              | 1248        | NR                      | nan        | Convenience     | Persons who are incarcerated                   | 92.0% (90.4-93.4%)                                   | Not reported   Not Reported   Not reported                                               | No data                                                                            | -                                                |
| Leidner (Chiles Research Institute) <sup>261</sup>          | 2020-04-08 to 2020-05-22 | Oregon                          | Regional         | High                 | 10019       | Median 42 (Range 18-82) | 75.7       | Convenience     | Multiple populations                           | 2.5% (2.2-2.9%)                                      | Author-designed   N/A - Author-designed   IgG                                            | 80.0, 100.0 (Test developer / manufacturer evaluation)                             | 3.3% (2.6-4.0%)                                  |
| Geraci (MUSC Health-Lancaster) <sup>262</sup>               | Until 2020-05-20         | South Carolina   Lancaster      | Sublocal         | High                 | 230         | NR                      | nan        | Unclear         | Health care workers and caregivers             | 2.2% (0.7-5.0%)                                      | Abbott   Not Reported   Not reported                                                     | No data                                                                            | -                                                |
| Mughal (Monmouth Medical Centre) <sup>263</sup>             | 2020-05-14 to 2020-05-19 | New Jersey   Long Branch        | Sublocal         | High                 | 121         | Mean 39.2 (IQR 28-48.5) | 82.6       | Convenience     | Health care workers and caregivers             | 0.8% (0.0-4.5%)                                      | SD Biosensor   Standard Q COVID-19 IgM/IgG Duo rapid immunochromatography test kit   IgG | 96.2, 96.6 (Test developer / manufacturer evaluation)                              | 1.2% (0.0-2.7%)                                  |
| Dietrich (Tulane University) <sup>264</sup>                 | 2020-03-18 to 2020-05-15 | Louisiana   New Orleans         | Local            | High                 | 812         | Median 11.0 (IQR 4-15)  | 50.4       | Convenience     | Patients seeking care for non-COVID-19 reasons | 7.6% (5.9-9.6%)                                      | Author-designed   N/A - Author-designed   IgG                                            | 75.6, 97.6 (Used Bastos SR/MA data; no sens, spec, or author adjustment available) | 7.0% (4.5-9.3%)                                  |
| Parker-Magyar (Summit Medical Center) <sup>265</sup>        | 2020-05-01 to 2020-05-14 | New Jersey   Long Hill Township | Sublocal         | High                 | 70          | NR                      | nan        | Self-referral   | Essential non-healthcare workers               | 4.3% (0.9-12.0%)                                     | Not reported   Not Reported   Not reported                                               | No data                                                                            | -                                                |
| Hunter (Indiana University) <sup>266</sup>                  | 2020-04-29 to 2020-05-08 | Indiana                         | Regional         | High                 | 734         | Mean 42.8 (NR)          | 70.0       | Convenience     | Health care workers and caregivers             | 1.6% (0.8-2.8%)                                      | Abbott   Abbott Architect SARS-CoV-2 IgG assay   IgG                                     | 41.2, 100.0 (FINDDx / MUHC independent evaluation)                                 | 3.0% (0.3-5.2%)                                  |
| Ripperger (University of Arizona) <sup>267</sup>            | 2020-04-30 to 2020-05-07 | Arizona                         | Local            | High                 | 5882        | Median 40 (Range 18-85) | 52.4       | Self-referral   | Multiple populations                           | 1.2% (1.0-1.6%)                                      | Author-designed   Author-designed   IgG                                                  | 75.6, 97.6 (Used Bastos SR/MA data; no sens, spec, or author)                      | 0.1% (0.0-0.3%)                                  |

| Article Author (Study Organization)                               | Sampling Dates (YMD)     | Location                    | Geographic Scope | Overall Risk of Bias | Sample Size | Age                           | Female (%) | Sampling method | Sample Frame                                   | Uncorrected Seroprevalence (95% Confidence Interval) | Test Manufacturers   Names   Isotypes                                         | Test Sens, Spec (Source)                                                           | Corrected Seroprevalence (90% Credible Interval) |
|-------------------------------------------------------------------|--------------------------|-----------------------------|------------------|----------------------|-------------|-------------------------------|------------|-----------------|------------------------------------------------|------------------------------------------------------|-------------------------------------------------------------------------------|------------------------------------------------------------------------------------|--------------------------------------------------|
|                                                                   |                          |                             |                  |                      |             |                               |            |                 |                                                |                                                      |                                                                               | adjustment available)                                                              |                                                  |
| Sydney (Jacobi Medical Center) <sup>268</sup>                     | 2020-04-28 to 2020-05-04 | New York   New York City    | Sublocal         | High                 | 1700        | NR                            | nan        | Convenience     | Health care workers and caregivers             | 19.2% (17.4-21.2%)                                   | Abbott   Abbott Architect SARS-CoV-2 IgG assay   IgG                          | 41.2, 100.0 (FINDDx / MUHC independent evaluation)                                 | 47.8% (35.5-58.9%)                               |
| Reagan (Medical University South Carolina) <sup>269</sup>         | 2020-04-27 to 2020-05-02 | South Carolina   Charleston | Sublocal         | High                 | 920         | NR                            | nan        | Unclear         | Multiple populations                           | 2.0% (1.2-3.1%)                                      | Abbott   Not possible to determine   Not reported                             | No data                                                                            | -                                                |
| Jeremias (St Francis Hospital) <sup>270</sup>                     | 2020-03-01 to 2020-04-30 | New York                    | Sublocal         | High                 | 1699        | Mean 42.8 (SD 13.8)           | 74.1       | Convenience     | Health care workers and caregivers             | 9.8% (8.4-11.3%)                                     | EUROIMMUN; Abbott   Euroimmun Anti-SARS-CoV-2 ELISA IgG; SARS-CoV-2 IgG   IgG | No data                                                                            | -                                                |
| Cohen (DaVita Clinical Research) <sup>271</sup>                   | 2020-04-23 to 2020-04-30 | Florida                     | Local            | High                 | 677         | Mean 65.7 (SD +/- 14.5 years) | 41.1       | Convenience     | Patients seeking care for non-COVID-19 reasons | 5.6% (4.0-7.6%)                                      | Diazyme Laboratories Inc   DZ-Lite SARS-CoV-2 IgG IgM CLIA Kit   IgG; IgM     | 57.1, 85.0 (Author-reported independent evaluation)                                | 3.6% (0.0-7.8%)                                  |
| Payne (US Navy) <sup>272</sup>                                    | 2020-04-20 to 2020-04-24 | Guam                        | Sublocal         | High                 | 382         | Median 30 (IQR 24-35)         | 24.3       | Convenience     | Essential non-healthcare workers               | 59.7% (54.6-64.7%)                                   | CDC   CDC Pan-immunoglobulin ELISA   IgG; IgM; IgA                            | 75.6, 97.6 (Used Bastos SR/MA data; no sens, spec, or author adjustment available) | 78.3% (71.8-84.7%)                               |
| Kiefer (Ohio State University College of Medicine) <sup>273</sup> | 2020-04-23 to 2020-04-23 | Ohio   Columbus             | Sublocal         | High                 | 110         | Median 34 (IQR 28.8-45.0)     | 100.0      | Convenience     | Health care workers and caregivers             | 20.0% (13.0-28.7%)                                   | Epitope Diagnostics   Novel Coronavirus COVID-19 IgG ELISA Kit   IgG; IgM     | 80.8, 100.0 (FINDDx / MUHC independent evaluation)                                 | 25.5% (16.2-34.9%)                               |
| Slusser (Stanford University) <sup>274,275</sup>                  | 2020-04-08 to 2020-04-21 |                             | National         | Unclear              | 5603        | NR                            | nan        | Convenience     | Non-essential workers and unemployed persons   | 0.7% (0.5-1.0%)                                      | Not reported   Not Reported   Not reported                                    | No data                                                                            | -                                                |
| Morcuende (Columbia University Irving Medical Center)             | 2020-03-01 to 2020-04-21 | New York   New York City    | Sublocal         | High                 | 91          | NR                            | 42.9       | Convenience     | Health care workers and caregivers             | 12.1% (6.2-20.6%)                                    | Zhejiang Orient Gene Biotech Co., LTD   COVID-19 IgG / IgM                    | 93.1, 99.2 (Test developer /                                                       | 12.4% (5.0-19.3%)                                |

| Article Author (Study Organization)                        | Sampling Dates (YMD)     | Location               | Geographic Scope | Overall Risk of Bias | Sample Size | Age                                                  | Female (%) | Sampling method | Sample Frame                                   | Uncorrected Seroprevalence (95% Confidence Interval) | Test Manufacturers   Names   Isotypes                                                                         | Test Sens, Spec (Source)                                                           | Corrected Seroprevalence (90% Credible Interval) |
|------------------------------------------------------------|--------------------------|------------------------|------------------|----------------------|-------------|------------------------------------------------------|------------|-----------------|------------------------------------------------|------------------------------------------------------|---------------------------------------------------------------------------------------------------------------|------------------------------------------------------------------------------------|--------------------------------------------------|
| 276                                                        |                          |                        |                  |                      |             |                                                      |            |                 |                                                |                                                      | Rapid Test Cassette   IgG; IgM                                                                                | manufacturer evaluation)                                                           |                                                  |
| Stock (Albert Einstein College of Medicine)<br>277         | 2020-04-04 to 2020-04-20 | New York               | Local            | High                 | 98          | Mean 37.6 (SD 10.6)                                  | 50.0       | Convenience     | Health care workers and caregivers             | 15.3% (8.8-24.0%)                                    | Epitope Diagnostics   anti-n IgG ELISA   IgG                                                                  | 80.8, 100.0 (FINDDx / MUHC independent evaluation)                                 | 18.1% (9.8-26.4%)                                |
| Madsen (University of Utah)<br>278                         | 2020-04-13 to 2020-04-19 | Utah   Salt Lake City  | Sublocal         | High                 | 270         | NR                                                   | nan        | Self-referral   | Health care workers and caregivers             | 5.9% (3.4-9.4%)                                      | EUROIMMUN   Eurommun Anti-SARS-CoV-2-IgG   IgG                                                                | 76.9, 97.0 (FINDDx / MUHC independent evaluation)                                  | 3.5% (0.0-6.7%)                                  |
| Caban-Martinez (University of Miami)<br>279                | 2020-04-16 to 2020-04-17 | Florida                | Sublocal         | High                 | 203         | 21-30 (n=33); 31-40 (n=51); 41-50 (n=67); 51+ (n=52) | 6.4        | Convenience     | Essential non-healthcare workers               | 8.9% (5.4-13.7%)                                     | BioMedomics   Rapid immunoglobulin (Ig)M-IgG combined point-of-care (POC) lateral flow immunoassay   IgG; IgM | 64.8, 86.9 (FINDDx / MUHC independent evaluation)                                  | 3.1% (0.0-6.8%)                                  |
| Hains (Icahn School of Medicine at Mount Sinai)<br>280     | 2020-04-01 to 2020-04-15 | Indiana   Indianapolis | Sublocal         | High                 | 13          | Median 13 (IQR 2-16)                                 | 30.8       | Convenience     | Patients seeking care for non-COVID-19 reasons | 23.0% (5.0-53.7%)                                    | Abnova   COVID-19 Human IgM IgG Assay Kit   IgM; IgG                                                          | 75.6, 97.6 (Used Bastos SR/MA data; no sens, spec, or author adjustment available) | 24.2% (2.2-45.2%)                                |
| Hains (Icahn School of Medicine at Mount Sinai)<br>280     | 2020-04-01 to 2020-04-15 | Indiana   Indianapolis | Sublocal         | High                 | 25          | Median 40.5 (IQR 25-61)                              | 88.0       | Convenience     | Health care workers and caregivers             | 44.0% (24.4-65.1%)                                   | Abnova   COVID-19 Human IgM IgG Assay Kit   IgM; IgG                                                          | 75.6, 97.6 (Used Bastos SR/MA data; no sens, spec, or author adjustment available) | 57.2% (37.6-79.9%)                               |
| Stubblefield (Vanderbilt University Medical Center)<br>281 | 2020-04-03 to 2020-04-13 | Tennessee   Nashville  | Sublocal         | High                 | 249         | Median 33 (Range 21-70)                              | 65.5       | Convenience     | Health care workers and caregivers             | 7.6% (4.6-11.6%)                                     | CDC   CDC Non-commercial ELISA   IgM; IgG; IgA                                                                | 96.0, 99.0 (Test developer / manufacturer evaluation)                              | 6.6% (3.7-9.6%)                                  |
| Goldberg (Harvard Medical School)<br>282                   | 2020-04-01 to 2020-04-06 | Massachusetts          | Sublocal         | High                 | 140         | Mean 83 (resident age); 45 (staff) (Range 54-102)    | nan        | Convenience     | Assisted living and long-term care facilities  | 0.1% (0.0-2.8%)                                      | BioMedomics   COVID-19 IgM-IgG Dual Antibody Rapid Test   IgG; IgM                                            | 64.8, 86.9 (FINDDx / MUHC independent evaluation)                                  | 0.8% (0.0-2.7%)                                  |

| Article Author (Study Organization)                                | Sampling Dates (YMD)     | Location                 | Geographic Scope | Overall Risk of Bias | Sample Size | Age                         | Female (%) | Sampling method        | Sample Frame                       | Uncorrected Seroprevalence (95% Confidence Interval) | Test Manufacturers   Names   Isotypes                                               | Test Sens, Spec (Source)                                                           | Corrected Seroprevalence (90% Credible Interval) |
|--------------------------------------------------------------------|--------------------------|--------------------------|------------------|----------------------|-------------|-----------------------------|------------|------------------------|------------------------------------|------------------------------------------------------|-------------------------------------------------------------------------------------|------------------------------------------------------------------------------------|--------------------------------------------------|
|                                                                    |                          |                          |                  |                      |             | (resident); NR (staff))     |            |                        |                                    |                                                      |                                                                                     |                                                                                    |                                                  |
| Mansour (Icahn School of Medicine at Mount Sinai) <sup>283</sup>   | 2020-03-24 to 2020-04-04 | New York   New York City | Local            | High                 | 285         | Mean 38.36 (NR)             | 33.3       | Self-referral          | Health care workers and caregivers | 33.0% (27.6-38.8%)                                   | Not reported   Not Reported   IgG                                                   | 75.6, 97.6 (Used Bastos SR/MA data; no sens, spec, or author adjustment available) | 42.0% (35.1-48.1%)                               |
| Chu (US Centers for Disease Control and Prevention) <sup>284</sup> | 2020-01-20 to 2020-02-03 | Washington               | Regional         | High                 | 32          | Median 45 (Range 0-78)      | nan        | Convenience            | Contacts of COVID patients         | 0.0% (0.0-10.9%)                                     | Author-designed   CDC SARS-CoV-2 ELISA   Not reported                               | 96.0, 99.0 (Test developer / manufacturer evaluation)                              | -                                                |
| <b>North Africa and Middle East</b>                                |                          |                          |                  |                      |             |                             |            |                        |                                    |                                                      |                                                                                     |                                                                                    |                                                  |
| <b>Egypt</b>                                                       |                          |                          |                  |                      |             |                             |            |                        |                                    |                                                      |                                                                                     |                                                                                    |                                                  |
| Kassem (Cairo University) <sup>285</sup>                           | 2020-06-01 to 2020-06-14 |                          | Local            | High                 | 74          | Median 32 (Range 23-48)     | 59.5       | Convenience            | Health care workers and caregivers | 12.2% (5.7-21.9%)                                    | Artron Laboratories   COVID-19 IgM/IgG antibody rapid diagnostic test   IgG; IgM    | 43.2, 100.0 (FINDDx / MUHC independent evaluation)                                 | 29.7% (10.1-47.6%)                               |
| <b>Libya</b>                                                       |                          |                          |                  |                      |             |                             |            |                        |                                    |                                                      |                                                                                     |                                                                                    |                                                  |
| Kammon (Al-Zintan University) <sup>286</sup>                       | 2020-04-02 to 2020-05-18 | Libya   Alzintan City    | Local            | High                 | 77          | <=40 (n = 59); >40 (n = 18) | 29.9       | Stratified probability | Health care workers and caregivers | 0.0% (0.0-4.7%)                                      | Guangzhou Wondfo Biotech   One Step Novel COVID-19 IgM/IgG Antibody Test   IgM; IgG | 43.2, 100.0 (FINDDx / MUHC independent evaluation)                                 | -                                                |
| Kammon (Al-Zintan University) <sup>286</sup>                       | 2020-04-02 to 2020-05-18 | Libya   Alzintan City    | Local            | High                 | 142         | <=40 (n = 78); >40 (n = 64) | 65.5       | Simplified probability | Multiple populations               | 4.2% (1.6-9.0%)                                      | Guangzhou Wondfo Biotech   One Step Novel COVID-19 IgM/IgG Antibody Test   IgM; IgG | 43.2, 100.0 (FINDDx / MUHC independent evaluation)                                 | 9.0% (0.2-16.2%)                                 |
| <b>Turkey</b>                                                      |                          |                          |                  |                      |             |                             |            |                        |                                    |                                                      |                                                                                     |                                                                                    |                                                  |
| Alkurt (University of Health Sciences) <sup>287</sup>              | 2020-05-30 to 2020-06-06 |                          | Local            | Moderate             | 813         | Mean 34.8 (SD 9.54)         | 64.0       | Convenience            | Health care workers and caregivers | 2.7% (1.7-4.1%)                                      | Abbott   Abbott Architect SARS-CoV-2 IgG assay   IgG                                | 41.2, 100.0 (FINDDx / MUHC independent evaluation)                                 | 5.4% (2.1-8.9%)                                  |

| Article Author (Study Organization)                                                 | Sampling Dates (YMD)     | Location              | Geographic Scope | Overall Risk of Bias | Sample Size | Age                                                      | Female (%) | Sampling method        | Sample Frame                                   | Uncorrected Seroprevalence (95% Confidence Interval) | Test Manufacturers   Names   Isotypes                                                            | Test Sens, Spec (Source)                              | Corrected Seroprevalence (90% Credible Interval) |
|-------------------------------------------------------------------------------------|--------------------------|-----------------------|------------------|----------------------|-------------|----------------------------------------------------------|------------|------------------------|------------------------------------------------|------------------------------------------------------|--------------------------------------------------------------------------------------------------|-------------------------------------------------------|--------------------------------------------------|
| <b>South Asia</b>                                                                   |                          |                       |                  |                      |             |                                                          |            |                        |                                                |                                                      |                                                                                                  |                                                       |                                                  |
| <b>India</b>                                                                        |                          |                       |                  |                      |             |                                                          |            |                        |                                                |                                                      |                                                                                                  |                                                       |                                                  |
| Ray (All India Institute of Medical Sciences) <sup>288</sup>                        | 2020-06-08 to 2020-08-08 | Punjab                | Local            | High                 | 212         | Mean 41.2 (SD 15.4)                                      | 44.8       | Convenience            | Patients seeking care for non-COVID-19 reasons | 19.8% (14.7-25.8%)                                   | Translational Health Science and Technology Institute (THSTI), Faridabad   THSTI ELISA IgG   IgG | 88.2, 99.8 (Test developer / manufacturer evaluation) | 21.2% (13.5-27.3%)                               |
| Kakani ( University of Chicago) <sup>152,153</sup>                                  | 2020-06-29 to 2020-07-14 |                       | Regional         | Low                  | 4202        | 12-24 (n=702); 25-39 (n=1480); 40-60 (n=1695); 60+ (325) | 54.3       | Stratified probability | Persons living in slums                        | 54.1% (52.6-55.6%)                                   | Abbott   Abbott Architect SARS-CoV-2 IgG assay   IgG                                             | 41.2, 100.0 (FINDDx / MUHC independent evaluation)    | 96.4% (91.9-100.0%)                              |
| Unclear (Ahmedabad Municipal Corporation) <sup>289</sup>                            | 2020-06-16 to 2020-07-11 | Gujarat   Ahmedabad   | Local            | Unclear              | 30054       | NR                                                       | nan        | Unclear                | Multiple populations                           | 17.6% (17.2-18.0%)                                   | Not reported   Not Reported   Not reported                                                       | No data                                               | -                                                |
| Rao (Sri Jayadeva Institute of Cardiovascular Sciences and Research) <sup>290</sup> | 2020-05-23 to 2020-06-06 | Karnataka   Bengaluru | Sublocal         | Unclear              | 1000        | 30-40 (n=1000)                                           | 45.0       | Convenience            | Health care workers and caregivers             | 1.0% (0.5-1.8%)                                      | New Life Healthcare   Not Reported   IgG                                                         | No data                                               | -                                                |
| <b>Pakistan</b>                                                                     |                          |                       |                  |                      |             |                                                          |            |                        |                                                |                                                      |                                                                                                  |                                                       |                                                  |
| Chughtai (Chughtai Institute of Pathology) <sup>291</sup>                           | 2020-05-20 to 2020-05-30 |                       | Local            | High                 | 154         | Mean 27.1 (SD 3.8)                                       | 0.0        | Convenience            | Essential non-healthcare workers               | 15.6% (10.3-22.3%)                                   | Abbott   Abbott Architect SARS-CoV-2 IgG assay   IgG                                             | 41.2, 100.0 (FINDDx / MUHC independent evaluation)    | 39.4% (24.3-54.0%)                               |
| <b>Southeast Asia, East Asia, and Oceania</b>                                       |                          |                       |                  |                      |             |                                                          |            |                        |                                                |                                                      |                                                                                                  |                                                       |                                                  |
| <b>China</b>                                                                        |                          |                       |                  |                      |             |                                                          |            |                        |                                                |                                                      |                                                                                                  |                                                       |                                                  |
| He (Wuhan University) <sup>292</sup>                                                | 2020-05-13 to 2020-06-10 | Hubei                 | Sublocal         | High                 | 1059        | Median 32.69 (NR)                                        | 75.3       | Convenience            | Health care workers and caregivers             | 9.3% (7.6-11.2%)                                     | Livzon Diagnostics   Diagnostic Kit for IgM/IgG Antibody to Coronavirus   IgG                    | 70.1, 100.0 (FINDDx / MUHC independent evaluation)    | 12.2% (9.4-15.6%)                                |

| Article Author (Study Organization)                                                  | Sampling Dates (YMD)     | Location              | Geographic Scope | Overall Risk of Bias | Sample Size | Age                          | Female (%) | Sampling method | Sample Frame                                   | Uncorrected Seroprevalence (95% Confidence Interval) | Test Manufacturers   Names   Isotypes                                         | Test Sens, Spec (Source)                                                           | Corrected Seroprevalence (90% Credible Interval) |
|--------------------------------------------------------------------------------------|--------------------------|-----------------------|------------------|----------------------|-------------|------------------------------|------------|-----------------|------------------------------------------------|------------------------------------------------------|-------------------------------------------------------------------------------|------------------------------------------------------------------------------------|--------------------------------------------------|
| Liang (The First Affiliated Hospital of Guangzhou Medical University) <sup>293</sup> | 2020-01-19 to 2020-04-30 | Hubei   Wuhan         | Local            | High                 | 8272        | Median 55 (IQR 38-67)        | 50.0       | Convenience     | Hospital visitors                              | 2.1% (1.8-2.5%)                                      | Innovita   2019-nCoV Ab Test (Colloidal Gold)   IgG; IgM                      | 56.9, 96.3 (FINDDx / MUHC independent evaluation)                                  | 0.9% (0.0-1.9%)                                  |
| Liang (The First Affiliated Hospital of Guangzhou Medical University) <sup>293</sup> | 2020-01-20 to 2020-04-30 | Guangdong   Guangzhou | Local            | High                 | 8782        | Median 54 (IQR 44-62)        | 51.6       | Convenience     | Hospital visitors                              | 0.6% (0.4-0.8%)                                      | Shenzhen YHLO Biotech Co   SARS-CoV-2 IgM/IgG CLIA kits   IgG; IgM            | 97.8, 97.8 (Used Bastos SR/MA data; no sens, spec, or author adjustment available) | 0.0% (0.0-0.1%)                                  |
| Liu (Zhongnan Hospital of Wuhan University) <sup>164</sup>                           | 2020-02-29 to 2020-04-29 | Hubei   Wuhan         | Local            | Moderate             | 1616        | Mean 53.3 (95% CI 52.4-54.2) | 56.2       | Sequential      | Patients seeking care for non-COVID-19 reasons | 1.0% (0.6-1.6%)                                      | YHLO   SARS-CoV-2 IgM/IgG CLIA kits   IgG                                     | 73.1, 100.0 (FINDDx / MUHC independent evaluation)                                 | 1.0% (0.0-1.7%)                                  |
| Liu (Zhongnan Hospital of Wuhan University) <sup>164</sup>                           | 2020-02-29 to 2020-04-29 | Hubei   Wuhan         | Local            | Moderate             | 3832        | Mean 37.1 (95% CI 36.7-37.4) | 32.3       | Convenience     | Health care workers and caregivers             | 4.0% (3.4-4.7%)                                      | YHLO   SARS-CoV-2 IgM/IgG CLIA kits   IgG                                     | 73.1, 100.0 (FINDDx / MUHC independent evaluation)                                 | 4.3% (0.5-7.0%)                                  |
| Liu (Sun Yat-sen University) <sup>294</sup>                                          | 2020-02-07 to 2020-04-21 | Hubei   Wuhan         | Local            | High                 | 420         | Mean 35.8 (NR)               | 68.1       | Convenience     | Health care workers and caregivers             | 0.0% (0.0-0.9%)                                      | YHLO   SARS-CoV-2 IgM/IgG CLIA kits   IgG                                     | 100.0, 99.0 (FINDDx / MUHC independent evaluation)                                 | 0.2% (0.0-0.8%)                                  |
| He (Wuhan University) <sup>292</sup>                                                 | 2020-03-08 to 2020-04-19 |                       | Sublocal         | High                 | 1059        | Median 32.69 (NR)            | 75.3       | Convenience     | Health care workers and caregivers             | 11.7% (9.8-13.8%)                                    | Livzon Diagnostics   Diagnostic Kit for IgM/IgG Antibody to Coronavirus   IgG | 70.1, 100.0 (FINDDx / MUHC independent evaluation)                                 | 15.7% (12.4-19.2%)                               |
| Wu (Wuhan University) <sup>295</sup>                                                 | 2020-04-03 to 2020-04-15 | Hubei   Wuhan         | Sublocal         | High                 | 381         | NR                           | nan        | Unclear         | Patients seeking care for non-COVID-19 reasons | 10.5% (7.6-14.0%)                                    | Innovita Biological Technology Co. Ltd   2019-nCoV Ab Test   IgG; IgM         | 66.0, 96.6 (Used Bastos SR/MA data; no sens, spec, or author adjustment available) | 11.2% (6.8-15.3%)                                |
| Wu (Wuhan University) <sup>295</sup>                                                 | 2020-04-03 to 2020-04-15 | Hubei   Wuhan         | Sublocal         | High                 | 1021        | NR                           | nan        | Unclear         | Essential non-healthcare workers               | 9.6% (7.9-11.6%)                                     | Innovita Biological Technology Co. Ltd   2019-nCoV Ab Test   IgG; IgM         | 66.0, 96.6 (Used Bastos SR/MA data; no sens, spec, or author)                      | 10.0% (7.6-12.7%)                                |

| Article Author (Study Organization)                                      | Sampling Dates (YMD)     | Location                                                                                  | Geographic Scope | Overall Risk of Bias | Sample Size | Age                     | Female (%) | Sampling method        | Sample Frame                                   | Uncorrected Seroprevalence (95% Confidence Interval) | Test Manufacturers   Names   Isotypes                                                                                 | Test Sens, Spec (Source)                                                           | Corrected Seroprevalence (90% Credible Interval) |
|--------------------------------------------------------------------------|--------------------------|-------------------------------------------------------------------------------------------|------------------|----------------------|-------------|-------------------------|------------|------------------------|------------------------------------------------|------------------------------------------------------|-----------------------------------------------------------------------------------------------------------------------|------------------------------------------------------------------------------------|--------------------------------------------------|
|                                                                          |                          |                                                                                           |                  |                      |             |                         |            |                        |                                                |                                                      |                                                                                                                       | adjustment available)                                                              |                                                  |
| Xu (National Clinical Research Centre for Kidney Disease) <sup>296</sup> | 2020-03-09 to 2020-04-10 | Hubei, Sichuan, Guangdong   Wuhan, Guangzhou, Jinzhou, Honghu, Chongqing, Chengdu, Foshan | National         | High                 | 6919        | Median 41 (IQR 31-56)   | 63.1       | Self-referral          | Multiple populations                           | 2.5% (2.1-2.8%)                                      | Bioscience   Magnetic Chemiluminescence Enzyme Immunoassay Kit   IgG; IgM                                             | 97.8, 97.8 (Used Bastos SR/MA data; no sens, spec, or author adjustment available) | 0.4% (0.0-0.7%)                                  |
| Xu (National Clinical Research Centre for Kidney Disease) <sup>296</sup> | 2020-03-09 to 2020-04-10 | Hubei, Sichuan, Guangdong   Wuhan, Chengdu, Guangzhou                                     | National         | High                 | 10449       | Median 50 (IQR 35-49)   | 52.3       | Self-referral          | Multiple populations                           | 0.8% (0.6-1.0%)                                      | Bioscience   Magnetic Chemiluminescence Enzyme Immunoassay Kit   IgG; IgM                                             | 97.8, 97.8 (Used Bastos SR/MA data; no sens, spec, or author adjustment available) | 0.0% (0.0-0.1%)                                  |
| Zhang (Huazhong University of Science and Technology) <sup>297</sup>     | 2020-01-23 to 2020-03-27 | Hubei                                                                                     | Sublocal         | High                 | 44          | Median 6 (Range 1-15)   | 38.6       | Sequential             | Patients seeking care for non-COVID-19 reasons | 0.0% (0.0-8.0%)                                      | Not reported   Not Reported   IgG; IgM                                                                                | 97.8, 97.8 (Used Bastos SR/MA data; no sens, spec, or author adjustment available) | -                                                |
| Tang ( Tongji Medical College) <sup>298</sup>                            | 2020-03-08 to 2020-03-21 | Hubei   Wuhan                                                                             | Local            | Moderate             | 1027        | Mean 60.3 (SD 13.4)     | 39.7       | Convenience            | Patients seeking care for non-COVID-19 reasons | 4.6% (3.4-6.0%)                                      | Tangshan Yingnuote Biotechnology Enterprise Co., Ltd.   Tangshan Colloidal Gold Immunochromatography Assay   IgG; IgM | 87.3, 100.0 (FINDDx / MUHC independent evaluation)                                 | 3.9% (1.4-6.2%)                                  |
| Tu (Wuhan Institute of Virology) <sup>299</sup>                          | 2020-03-19 to 2020-03-20 | Hubei                                                                                     | Sublocal         | High                 | 325         | NR                      | nan        | Stratified probability | Health care workers and caregivers             | 24.3% (19.7-29.3%)                                   | Zhu Hai Livzon Diagnostics Ins   Zhu Hai Livzon ELISA   IgG                                                           | 75.6, 97.6 (Used Bastos SR/MA data; no sens, spec, or author adjustment available) | 30.1% (24.5-35.2%)                               |
| Zhang (Shenzhen Second People's Hospital) <sup>300</sup>                 | 2020-02-29 to 2020-03-18 | Guangdong                                                                                 | Local            | High                 | 1589        | Mean 36.4 (Range 11-89) | nan        | Convenience            | Non-essential workers and unemployed persons   | 0.4% (0.1-0.8%)                                      | Shenzhen Sciarray Biotech Ltd   shenzhen ELISA   IgG                                                                  | 75.6, 97.6 (Used Bastos SR/MA data; no sens, spec, or author                       | 0.1% (0.0-0.3%)                                  |



| Article Author (Study Organization)                                       | Sampling Dates (YMD)     | Location          | Geographic Scope | Overall Risk of Bias | Sample Size | Age                                                                                                                                                                        | Female (%) | Sampling method | Sample Frame                       | Uncorrected Seroprevalence (95% Confidence Interval) | Test Manufacturers   Names   Isotypes                                        | Test Sens, Spec (Source)                                                           | Corrected Seroprevalence (90% Credible Interval) |
|---------------------------------------------------------------------------|--------------------------|-------------------|------------------|----------------------|-------------|----------------------------------------------------------------------------------------------------------------------------------------------------------------------------|------------|-----------------|------------------------------------|------------------------------------------------------|------------------------------------------------------------------------------|------------------------------------------------------------------------------------|--------------------------------------------------|
|                                                                           |                          |                   |                  |                      |             |                                                                                                                                                                            |            |                 |                                    |                                                      |                                                                              | adjustment available)                                                              |                                                  |
| Xiong (Huazhong University of Science and Technology) <sup>301</sup>      | 2020-02-12 to 2020-03-17 | Hubei   Wuhan     | Local            | Unclear              | 797         | Median 31 (Range 23-53)                                                                                                                                                    | 88.5       | Convenience     | Health care workers and caregivers | 4.4% (3.1-6.1%)                                      | Not reported   Not Reported   IgG                                            | 75.6, 97.6 (Used Bastos SR/MA data; no sens, spec, or author adjustment available) | 2.6% (0.7-4.4%)                                  |
| Zhao (Renmin Hospital of Wuhan University) <sup>302</sup>                 | 2020-01-14 to 2020-02-21 | Hubei             | Sublocal         | High                 | 1060        | NR                                                                                                                                                                         | nan        | Convenience     | Health care workers and caregivers | 8.3% (6.7-10.1%)                                     | Shenzhen YHLO Biotech Co   Not Reported   IgG; IgM                           | 97.8, 97.8 (Used Bastos SR/MA data; no sens, spec, or author adjustment available) | 6.4% (4.8-7.8%)                                  |
| Chen (Nanjing University Medical School) <sup>303</sup>                   | 2020-02-19 to 2020-02-19 | Jiangsu   Nanjing | Local            | High                 | 105         | Median 30 (IQR 26-62)                                                                                                                                                      | 79.0       | Convenience     | Health care workers and caregivers | 17.1% (10.5-25.7%)                                   | Author-designed   N/A - Author-designed   IgG; IgM                           | 93.3, 100.0 (Test developer / manufacturer evaluation)                             | 17.6% (10.7-24.8%)                               |
| Zhang (Shengjing Hospital of China Medical University) <sup>304 305</sup> | 2020-01-21 to 2020-02-16 | Liaoning          | Regional         | High                 | 510         | Median 35 (Non-COVID-19 group); 50 years (Other disease group); 40 (Medical staff) (Range 1-86 (Non-COVID-19 group); (27 - 85) Other disease group; 25-61 (Medical staff)) | 62.2       | Convenience     | Multiple populations               | 0.6% (0.1-1.7%)                                      | Shenzhen Yahuilong Biotechnology Co.   Chemiluminescence Detection Kit   IgG | 91.7, 98.8 (FINDdx / MUHC independent evaluation)                                  | 0.4% (0.0-0.8%)                                  |
| <b>Thailand</b>                                                           |                          |                   |                  |                      |             |                                                                                                                                                                            |            |                 |                                    |                                                      |                                                                              |                                                                                    |                                                  |
| Nopsopon (Chulalongkorn University) <sup>306</sup>                        | 2020-04-08 to 2020-06-26 |                   | National         | Moderate             | 857         | Median 37 (IQR 27-45)                                                                                                                                                      | 74.7       | Convenience     | Multiple populations               | 5.5% (4.1-7.2%)                                      | Baiya Phytopharm   Baiya Rapid COVID-19 IgG/IgM Test Kit   IgM               | 94.1, 98.0 (Author-reported independent evaluation)                                | 3.5% (0.9-5.9%)                                  |

| Article Author (Study Organization)                                                   | Sampling Dates (YMD)     | Location               | Geographic Scope | Overall Risk of Bias | Sample Size | Age                     | Female (%) | Sampling method | Sample Frame                                 | Uncorrected Seroprevalence (95% Confidence Interval) | Test Manufacturers   Names   Isotypes                              | Test Sens, Spec (Source)                              | Corrected Seroprevalence (90% Credible Interval) |
|---------------------------------------------------------------------------------------|--------------------------|------------------------|------------------|----------------------|-------------|-------------------------|------------|-----------------|----------------------------------------------|------------------------------------------------------|--------------------------------------------------------------------|-------------------------------------------------------|--------------------------------------------------|
| <b>Sub-Saharan Africa</b>                                                             |                          |                        |                  |                      |             |                         |            |                 |                                              |                                                      |                                                                    |                                                       |                                                  |
| <b>Malawi</b>                                                                         |                          |                        |                  |                      |             |                         |            |                 |                                              |                                                      |                                                                    |                                                       |                                                  |
| Chibwana (Malawi-Liverpool-Wellcome Trust Clinical Research Programme) <sup>307</sup> | 2020-05-22 to 2020-06-19 | Southern Region Malawi | National         | High                 | 500         | Median 31 (Range 20-64) | 52.8       | Convenience     | Health care workers and caregivers           | 16.8% (13.6-20.4%)                                   | Omega diagnostics   COVID-19 IgG ELISA   IgG                       | 88.1, 93.2 (Test developer / manufacturer evaluation) | 11.1% (3.6-17.5%)                                |
| <b>Nigeria</b>                                                                        |                          |                        |                  |                      |             |                         |            |                 |                                              |                                                      |                                                                    |                                                       |                                                  |
| Asuquo (Joseph Ukpo Hospitals and Research Institutes) <sup>308</sup>                 | 2020-06-17 to 2020-06-24 | Cross River State      | Sublocal         | High                 | 44          | NR                      | 63.6       | Unclear         | Multiple populations                         | 20.4% (9.8-35.2%)                                    | Zhejiang Orient Gene Biotech Co., LTD   Rapid test kit   IgG       | 93.1, 99.2 (FINDDx / MUHC independent evaluation)     | 20.5% (9.6-31.9%)                                |
| Asuquo (Joseph Ukpo Hospitals and Research Institutes) <sup>308</sup>                 | 2020-06-17 to 2020-06-24 | Cross River State      | Sublocal         | High                 | 66          | NR                      | 42.4       | Unclear         | Multiple populations                         | 26.0% (16.0-38.3%)                                   | Healgen Scientific   COVID-19 IgG / IgM Rapid Test Cassette   IgG  | 96.7, 97.5 (FINDDx / MUHC independent evaluation)     | 25.3% (15.0-36.2%)                               |
| <b>Togo</b>                                                                           |                          |                        |                  |                      |             |                         |            |                 |                                              |                                                      |                                                                    |                                                       |                                                  |
| Halatoko (Universite de Lome) <sup>309</sup>                                          | 2020-04-23 to 2020-05-08 |                        | Local            | High                 | 955         | Median 36 (IQR 32-43)   | 28.4       | Convenience     | Non-essential workers and unemployed persons | 0.9% (0.4-1.7%)                                      | Hangzhou Clongene Biotech Co, Ltd.   Lungene Rapid Test   IgM; IgG | 65.4, 90.3 (FINDDx / MUHC independent evaluation)     | 0.3% (0.0-0.8%)                                  |

**Supplementary Table 3. Risk of bias results**

| Article Author<br>(Study Organization)                                                 | Sampling End<br>Date<br>(YMD) | Item 1:<br>Appropriate<br>sample<br>frame* | Item 2:<br>Probability<br>sampling<br>method | Item 3:<br>Adequate<br>sample<br>size | Item 4:<br>Subjects &<br>setting<br>described | Item 5:<br>Good<br>coverage of<br>sample | Item 6: Sens<br>> 90% &<br>spec > 95% | Item 7: Same<br>tests for all<br>subjects | Item 8:<br>Appropriate<br>analysis | Item 9:<br>Adequate<br>response<br>rate | Overall Risk of<br>Bias† |
|----------------------------------------------------------------------------------------|-------------------------------|--------------------------------------------|----------------------------------------------|---------------------------------------|-----------------------------------------------|------------------------------------------|---------------------------------------|-------------------------------------------|------------------------------------|-----------------------------------------|--------------------------|
| <b>Central Europe, Eastern Europe, and Central Asia</b>                                |                               |                                            |                                              |                                       |                                               |                                          |                                       |                                           |                                    |                                         |                          |
| <b>Armenia</b>                                                                         |                               |                                            |                                              |                                       |                                               |                                          |                                       |                                           |                                    |                                         |                          |
| Grigoryan (Ministry of Health of the Republic of Armenia) <sup>173</sup>               | 2020-06-29                    | Yes                                        | Unclear                                      | No                                    | No                                            | Unclear                                  | Yes                                   | Yes                                       | No                                 | Unclear                                 | High                     |
| <b>Bulgaria</b>                                                                        |                               |                                            |                                              |                                       |                                               |                                          |                                       |                                           |                                    |                                         |                          |
| Tsaneva-Damyanova (Medical Diagnostic Laboratory "STATUS") <sup>174</sup>              | 2020-04-20                    | Yes                                        | No                                           | No                                    | No                                            | Unclear                                  | No                                    | Yes                                       | No                                 | Unclear                                 | High                     |
| <b>Croatia</b>                                                                         |                               |                                            |                                              |                                       |                                               |                                          |                                       |                                           |                                    |                                         |                          |
| Vilibic-Cavlek (University of Zagreb) <sup>175</sup>                                   | 2020-05-24                    | Yes                                        | No                                           | No                                    | Yes                                           | Yes                                      | Unclear                               | Yes                                       | No                                 | Unclear                                 | High                     |
| Jerkovic (University of Split) <sup>176</sup>                                          | 2020-04-28                    | Yes                                        | No                                           | Yes                                   | Yes                                           | No                                       | Yes                                   | Yes                                       | No                                 | Unclear                                 | High                     |
| <b>Czechia</b>                                                                         |                               |                                            |                                              |                                       |                                               |                                          |                                       |                                           |                                    |                                         |                          |
| Malickova (Clinical and Research Center for Inflammatory Bowel Disease) <sup>177</sup> | 2020-04-15                    | Yes                                        | Unclear                                      | No                                    | Yes                                           | Yes                                      | Unclear                               | Yes                                       | No                                 | Unclear                                 | Unclear                  |
| <b>Hungary</b>                                                                         |                               |                                            |                                              |                                       |                                               |                                          |                                       |                                           |                                    |                                         |                          |
| Merkely (Semmelweis University) <sup>30</sup>                                          | 2020-05-16                    | Yes                                        | Yes                                          | Yes                                   | Yes                                           | Yes                                      | Unclear                               | Yes                                       | No                                 | No                                      | Moderate                 |
| <b>Romania</b>                                                                         |                               |                                            |                                              |                                       |                                               |                                          |                                       |                                           |                                    |                                         |                          |
| MedLife (MedLife) <sup>178</sup>                                                       | 2020-04-21                    | Yes                                        | Unclear                                      | No                                    | No                                            | Unclear                                  | Unclear                               | No                                        | No                                 | Unclear                                 | Unclear                  |
| <b>Russian Federation</b>                                                              |                               |                                            |                                              |                                       |                                               |                                          |                                       |                                           |                                    |                                         |                          |

| Article Author (Study Organization)                                         | Sampling End Date (YMD) | Item 1: Appropriate sample frame* | Item 2: Probability sampling method | Item 3: Adequate sample size | Item 4: Subjects & setting described | Item 5: Good coverage of sample | Item 6: Sens > 90% & spec > 95% | Item 7: Same tests for all subjects | Item 8: Appropriate analysis | Item 9: Adequate response rate | Overall Risk of Bias† |
|-----------------------------------------------------------------------------|-------------------------|-----------------------------------|-------------------------------------|------------------------------|--------------------------------------|---------------------------------|---------------------------------|-------------------------------------|------------------------------|--------------------------------|-----------------------|
| Tickle (City of Moscow) <sup>31</sup>                                       | 2020-06-18              | Yes                               | Yes                                 | Yes                          | No                                   | Unclear                         | Unclear                         | Unclear                             | No                           | Unclear                        | High                  |
| Kiselyov (Russian National Council for Combating Coronavirus) <sup>32</sup> | 2020-06-10              | Yes                               | Unclear                             | Yes                          | No                                   | Unclear                         | Yes                             | Yes                                 | No                           | Unclear                        | Moderate              |
| <b>High-income</b>                                                          |                         |                                   |                                     |                              |                                      |                                 |                                 |                                     |                              |                                |                       |
| <b>Argentina</b>                                                            |                         |                                   |                                     |                              |                                      |                                 |                                 |                                     |                              |                                |                       |
| Figar (Minister of Health, Buenos Aires City) <sup>179</sup>                | 2020-07-01              | Yes                               | Yes                                 | Yes                          | Yes                                  | Unclear                         | Yes                             | Yes                                 | No                           | Unclear                        | Moderate              |
| Figar (Minister of Health, Buenos Aires City) <sup>179</sup>                | 2020-07-01              | Yes                               | No                                  | No                           | No                                   | Unclear                         | No                              | Yes                                 | No                           | Unclear                        | High                  |
| <b>Australia</b>                                                            |                         |                                   |                                     |                              |                                      |                                 |                                 |                                     |                              |                                |                       |
| Macartney (University of Sydney) <sup>180</sup>                             | 2020-04-10              | Yes                               | No                                  | Yes                          | No                                   | Yes                             | Yes                             | Yes                                 | No                           | Unclear                        | Moderate              |
| <b>Austria</b>                                                              |                         |                                   |                                     |                              |                                      |                                 |                                 |                                     |                              |                                |                       |
| Hackner (Karl Landsteiner University of Health Sciences) <sup>181</sup>     | 2020-04-30              | No                                | No                                  | No                           | Yes                                  | Unclear                         | No                              | Yes                                 | No                           | Unclear                        | High                  |
| Knabl (Medical University of Innsbruck) <sup>33</sup>                       | 2020-04-27              | Yes                               | Yes                                 | Yes                          | Yes                                  | Yes                             | Yes                             | Yes                                 | No                           | Yes                            | Moderate              |
| Reiter (Medical University of Vienna) <sup>182</sup>                        | 2020-03-29              | Yes                               | No                                  | No                           | Yes                                  | Unclear                         | Unclear                         | Yes                                 | No                           | Yes                            | High                  |
| Orth-Höller (Innsbruck Clinical Microbiology Laboratory) <sup>183</sup>     | 2020-03-27              | Yes                               | No                                  | No                           | Yes                                  | No                              | No                              | Yes                                 | No                           | Unclear                        | High                  |
| <b>Belgium</b>                                                              |                         |                                   |                                     |                              |                                      |                                 |                                 |                                     |                              |                                |                       |
| Herzog (University of Antwerp) <sup>34</sup>                                | 2020-07-04              | No                                | No                                  | Yes                          | Yes                                  | Yes                             | No                              | Yes                                 | Yes                          | Unclear                        | Moderate              |

| Article Author<br>(Study Organization)                                       | Sampling End<br>Date<br>(YMD) | Item 1:<br>Appropriate<br>sample<br>frame* | Item 2:<br>Probability<br>sampling<br>method | Item 3:<br>Adequate<br>sample<br>size | Item 4:<br>Subjects &<br>setting<br>described | Item 5:<br>Good<br>coverage of<br>sample | Item 6: Sens<br>> 90% &<br>spec > 95% | Item 7: Same<br>tests for all<br>subjects | Item 8:<br>Appropriate<br>analysis | Item 9:<br>Adequate<br>response<br>rate | Overall Risk of<br>Bias† |
|------------------------------------------------------------------------------|-------------------------------|--------------------------------------------|----------------------------------------------|---------------------------------------|-----------------------------------------------|------------------------------------------|---------------------------------------|-------------------------------------------|------------------------------------|-----------------------------------------|--------------------------|
| Blairon (Iris Hospitals<br>South) <sup>184</sup>                             | 2020-06-19                    | Yes                                        | No                                           | Yes                                   | Yes                                           | Yes                                      | Unclear                               | Yes                                       | No                                 | No                                      | High                     |
| Herzog (University of<br>Antwerp) <sup>34</sup>                              | 2020-06-13                    | No                                         | No                                           | Yes                                   | Yes                                           | Yes                                      | No                                    | Yes                                       | Yes                                | Unclear                                 | Moderate                 |
| Herzog (University of<br>Antwerp) <sup>34</sup>                              | 2020-05-25                    | No                                         | No                                           | Yes                                   | Yes                                           | Yes                                      | No                                    | Yes                                       | Yes                                | Unclear                                 | Moderate                 |
| Berardis (Cliniques<br>universitaires Saint-Luc) <sup>185</sup>              | 2020-05-19                    | Yes                                        | No                                           | No                                    | Yes                                           | Yes                                      | No                                    | Yes                                       | No                                 | Unclear                                 | High                     |
| Martin (Université Libre de<br>Bruxelles) <sup>186</sup>                     | 2020-05-18                    | Yes                                        | No                                           | No                                    | Yes                                           | Unclear                                  | Unclear                               | Yes                                       | No                                 | No                                      | High                     |
| Steensels (ZiekenhuisOost-<br>Limburg) <sup>187</sup>                        | 2020-04-30                    | No                                         | No                                           | Yes                                   | No                                            | Yes                                      | Yes                                   | Yes                                       | Yes                                | Yes                                     | High                     |
| Herzog (University of<br>Antwerp) <sup>34</sup>                              | 2020-04-26                    | No                                         | No                                           | Yes                                   | Yes                                           | Yes                                      | No                                    | Yes                                       | Yes                                | Unclear                                 | Moderate                 |
| Herzog (University of<br>Antwerp) <sup>34</sup>                              | 2020-04-05                    | No                                         | No                                           | Yes                                   | Yes                                           | Yes                                      | No                                    | Yes                                       | Yes                                | Unclear                                 | Moderate                 |
| <b>Canada</b>                                                                |                               |                                            |                                              |                                       |                                               |                                          |                                       |                                           |                                    |                                         |                          |
| Héma-Québec <sup>35 36</sup>                                                 | 2020-07-09                    | No                                         | Yes                                          | Yes                                   | No                                            | Unclear                                  | Unclear                               | Unclear                                   | No                                 | Unclear                                 | Unclear                  |
| Public Health Ontario <sup>37 38</sup>                                       | 2020-06-30                    | No                                         | Yes                                          | Yes                                   | Yes                                           | Unclear                                  | Yes                                   | Yes                                       | Yes                                | Unclear                                 | Moderate                 |
| Canadian Blood Services <sup>39</sup>                                        | 2020-06-18                    | No                                         | Unclear                                      | Yes                                   | Yes                                           | Yes                                      | Yes                                   | Yes                                       | Yes                                | Yes                                     | Moderate                 |
| Public Health Ontario <sup>37 38</sup>                                       | 2020-05-31                    | No                                         | Yes                                          | Yes                                   | Yes                                           | Unclear                                  | Yes                                   | Yes                                       | Yes                                | Unclear                                 | Moderate                 |
| Skowronski <sup>40</sup>                                                     | 2020-05-27                    | No                                         | Yes                                          | Yes                                   | Yes                                           | Yes                                      | No                                    | Yes                                       | No                                 | Unclear                                 | Moderate                 |
| Public Health Ontario <sup>37 38</sup>                                       | 2020-04-30                    | No                                         | Yes                                          | Yes                                   | Yes                                           | Unclear                                  | Yes                                   | Yes                                       | Yes                                | Unclear                                 | Moderate                 |
| Skowronski (British<br>Columbia Centre for Disease<br>Control) <sup>40</sup> | 2020-03-13                    | No                                         | Yes                                          | Yes                                   | Yes                                           | Yes                                      | No                                    | Yes                                       | No                                 | Unclear                                 | Moderate                 |

| Article Author<br>(Study Organization)                                                | Sampling End<br>Date<br>(YMD) | Item 1:<br>Appropriate<br>sample<br>frame* | Item 2:<br>Probability<br>sampling<br>method | Item 3:<br>Adequate<br>sample<br>size | Item 4:<br>Subjects &<br>setting<br>described | Item 5:<br>Good<br>coverage of<br>sample | Item 6: Sens<br>> 90% &<br>spec > 95% | Item 7: Same<br>tests for all<br>subjects | Item 8:<br>Appropriate<br>analysis | Item 9:<br>Adequate<br>response<br>rate | Overall Risk of<br>Bias <sup>†</sup> |
|---------------------------------------------------------------------------------------|-------------------------------|--------------------------------------------|----------------------------------------------|---------------------------------------|-----------------------------------------------|------------------------------------------|---------------------------------------|-------------------------------------------|------------------------------------|-----------------------------------------|--------------------------------------|
| <b>Chile</b>                                                                          |                               |                                            |                                              |                                       |                                               |                                          |                                       |                                           |                                    |                                         |                                      |
| Torres (Universidade de Chile) <sup>188</sup>                                         | 2020-05-19                    | No                                         | Yes                                          | Yes                                   | Yes                                           | Yes                                      | Unclear                               | Yes                                       | No                                 | Yes                                     | High                                 |
| Torres (Universidade de Chile) <sup>188</sup>                                         | 2020-05-19                    | No                                         | Yes                                          | No                                    | Yes                                           | Yes                                      | Unclear                               | Yes                                       | No                                 | Yes                                     | High                                 |
| <b>Denmark</b>                                                                        |                               |                                            |                                              |                                       |                                               |                                          |                                       |                                           |                                    |                                         |                                      |
| Jespersen (Aarhus University Hospital) <sup>41</sup>                                  | 2020-06-30                    | No                                         | Unclear                                      | No                                    | No                                            | Unclear                                  | Yes                                   | Yes                                       | Unclear                            | Unclear                                 | High                                 |
| Jespersen (Aarhus University Hospital) <sup>41</sup>                                  | 2020-06-30                    | No                                         | Unclear                                      | No                                    | No                                            | Unclear                                  | Yes                                   | Yes                                       | Unclear                            | Unclear                                 | High                                 |
| Jespersen (Aarhus University Hospital) <sup>41</sup>                                  | 2020-06-19                    | Yes                                        | No                                           | Yes                                   | Yes                                           | Yes                                      | Yes                                   | Yes                                       | Yes                                | Yes                                     | Moderate                             |
| Erikstrup (Copenhagen University Hospital) <sup>42</sup>                              | 2020-05-03                    | No                                         | Yes                                          | Yes                                   | Yes                                           | Yes                                      | Yes                                   | Yes                                       | No                                 | Yes                                     | Moderate                             |
| Petersen (University of the Faroe Islands) <sup>43</sup>                              | 2020-05-01                    | Yes                                        | Yes                                          | Yes                                   | Yes                                           | Yes                                      | Yes                                   | Yes                                       | Yes                                | Yes                                     | Low                                  |
| Iversen (University of Copenhagen) <sup>44</sup>                                      | 2020-04-22                    | Yes                                        | Yes                                          | Yes                                   | Yes                                           | Yes                                      | No                                    | Yes                                       | Yes                                | Yes                                     | Low                                  |
| Iversen (University of Copenhagen) <sup>44</sup>                                      | 2020-04-22                    | No                                         | No                                           | Yes                                   | No                                            | Unclear                                  | Yes                                   | Yes                                       | No                                 | Unclear                                 | High                                 |
| <b>France</b>                                                                         |                               |                                            |                                              |                                       |                                               |                                          |                                       |                                           |                                    |                                         |                                      |
| Mesnil (Rothschild Foundation Hospital) <sup>189</sup>                                | 2020-06-22                    | No                                         | No                                           | Yes                                   | Yes                                           | Unclear                                  | Unclear                               | Yes                                       | No                                 | Yes                                     | High                                 |
| Cohen (Association Clinique et Thérapeutique Infantile du Val-de-Marne) <sup>45</sup> | 2020-05-12                    | Yes                                        | No                                           | Yes                                   | Yes                                           | No                                       | Yes                                   | Yes                                       | No                                 | Yes                                     | High                                 |
| Fumery (Picardie University) <sup>190</sup>                                           | 2020-05-11                    | No                                         | No                                           | No                                    | Yes                                           | Unclear                                  | Yes                                   | Yes                                       | No                                 | Yes                                     | High                                 |

| Article Author<br>(Study Organization)                         | Sampling End<br>Date<br>(YMD) | Item 1:<br>Appropriate<br>sample<br>frame* | Item 2:<br>Probability<br>sampling<br>method | Item 3:<br>Adequate<br>sample<br>size | Item 4:<br>Subjects &<br>setting<br>described | Item 5:<br>Good<br>coverage of<br>sample | Item 6: Sens<br>> 90% &<br>spec > 95% | Item 7: Same<br>tests for all<br>subjects | Item 8:<br>Appropriate<br>analysis | Item 9:<br>Adequate<br>response<br>rate | Overall Risk of<br>Bias <sup>†</sup> |
|----------------------------------------------------------------|-------------------------------|--------------------------------------------|----------------------------------------------|---------------------------------------|-----------------------------------------------|------------------------------------------|---------------------------------------|-------------------------------------------|------------------------------------|-----------------------------------------|--------------------------------------|
| Fontanet (Institut Pasteur) <sup>46</sup>                      | 2020-04-30                    | Yes                                        | Yes                                          | Yes                                   | Yes                                           | Yes                                      | Yes                                   | Yes                                       | No                                 | No                                      | Moderate                             |
| Solodky (Centre Leon<br>Berard) <sup>191</sup>                 | 2020-04-16                    | Yes                                        | No                                           | No                                    | No                                            | No                                       | Unclear                               | Yes                                       | No                                 | Unclear                                 | High                                 |
| Solodky (Centre Leon<br>Berard) <sup>191</sup>                 | 2020-04-16                    | Yes                                        | No                                           | No                                    | No                                            | Unclear                                  | Unclear                               | Yes                                       | No                                 | Unclear                                 | High                                 |
| Gallian (Unite des Virus<br>Emergents) <sup>47</sup>           | 2020-04-07                    | No                                         | Yes                                          | Yes                                   | Yes                                           | Unclear                                  | Unclear                               | Yes                                       | No                                 | Unclear                                 | High                                 |
| <b>Germany</b>                                                 |                               |                                            |                                              |                                       |                                               |                                          |                                       |                                           |                                    |                                         |                                      |
| Armann (Technische<br>Universität Dresden) <sup>193</sup>      | 2020-06-30                    | Yes                                        | No                                           | Yes                                   | Yes                                           | Unclear                                  | Yes                                   | Yes                                       | No                                 | Unclear                                 | High                                 |
| Epstude (Thuringia Clinic)<br><sup>192</sup>                   | 2020-06-30                    | No                                         | No                                           | No                                    | Yes                                           | Yes                                      | Unclear                               | Yes                                       | No                                 | Unclear                                 | High                                 |
| Epstude (Thuringia Clinic)<br><sup>192</sup>                   | 2020-06-30                    | No                                         | No                                           | No                                    | Yes                                           | Yes                                      | Unclear                               | Yes                                       | No                                 | Unclear                                 | High                                 |
| Fischer (Heart and Diabetes<br>Center NRW) <sup>48</sup>       | 2020-06-03                    | No                                         | No                                           | Yes                                   | No                                            | No                                       | Yes                                   | Yes                                       | No                                 | Unclear                                 | High                                 |
| Weis (Jena University<br>Hospital) <sup>49</sup>               | 2020-05-22                    | Yes                                        | No                                           | Yes                                   | Yes                                           | Yes                                      | Yes                                   | Yes                                       | No                                 | Yes                                     | Moderate                             |
| Zöllkau<br>(Universitätsklinikum Jena)<br><sup>194</sup>       | 2020-05-13                    | No                                         | Unclear                                      | No                                    | Yes                                           | Unclear                                  | No                                    | Yes                                       | No                                 | Unclear                                 | High                                 |
| Schmidt (University of<br>Hannover) <sup>195</sup>             | 2020-04-30                    | Yes                                        | No                                           | No                                    | Yes                                           | Unclear                                  | Yes                                   | Yes                                       | No                                 | Yes                                     | High                                 |
| Reisinger<br>(Universitätsmedizin<br>Rostock)<br><sup>50</sup> | 2020-04-22                    | Yes                                        | No                                           | No                                    | Yes                                           | Unclear                                  | Unclear                               | Yes                                       | No                                 | Unclear                                 | High                                 |
| Korth (University Hospital<br>Essen) <sup>196</sup>            | 2020-04-21                    | No                                         | No                                           | No                                    | No                                            | Unclear                                  | Unclear                               | Yes                                       | No                                 | Unclear                                 | High                                 |

| Article Author (Study Organization)                                        | Sampling End Date (YMD) | Item 1: Appropriate sample frame* | Item 2: Probability sampling method | Item 3: Adequate sample size | Item 4: Subjects & setting described | Item 5: Good coverage of sample | Item 6: Sens > 90% & spec > 95% | Item 7: Same tests for all subjects | Item 8: Appropriate analysis | Item 9: Adequate response rate | Overall Risk of Bias <sup>†</sup> |
|----------------------------------------------------------------------------|-------------------------|-----------------------------------|-------------------------------------|------------------------------|--------------------------------------|---------------------------------|---------------------------------|-------------------------------------|------------------------------|--------------------------------|-----------------------------------|
| Harsch (Thuringia Clinic) <sup>197</sup>                                   | 2020-04-21              | Yes                               | No                                  | No                           | No                                   | Unclear                         | Yes                             | Yes                                 | No                           | No                             | High                              |
| Behrens ( Hannover Medical School) <sup>198,199</sup>                      | 2020-04-17              | No                                | Unclear                             | No                           | No                                   | Unclear                         | No                              | Yes                                 | No                           | Unclear                        | High                              |
| Kern (Universitätsmedizin Marburg) <sup>200</sup>                          | 2020-04-16              | Yes                               | Unclear                             | Yes                          | Yes                                  | Unclear                         | Yes                             | Yes                                 | No                           | Unclear                        | High                              |
| Kraehling ( Goethe-University Frankfurt) <sup>201</sup>                    | 2020-04-14              | Yes                               | No                                  | Yes                          | Yes                                  | Yes                             | Yes                             | Yes                                 | Yes                          | Yes                            | Moderate                          |
| Streeck (University of Bonn) <sup>51</sup>                                 | 2020-04-06              | Yes                               | Yes                                 | Yes                          | Yes                                  | Unclear                         | Yes                             | Yes                                 | Yes                          | Yes                            | Low                               |
| Lackermair (University Hospital Munich) <sup>202</sup>                     | 2020-04-06              | No                                | No                                  | No                           | Yes                                  | No                              | Unclear                         | Yes                                 | No                           | Unclear                        | High                              |
| <b>Greece</b>                                                              |                         |                                   |                                     |                              |                                      |                                 |                                 |                                     |                              |                                |                                   |
| Psichogiou (National and Kapodistrian University of Athens) <sup>203</sup> | 2020-05-15              | Yes                               | No                                  | Yes                          | Yes                                  | Yes                             | No                              | Yes                                 | Yes                          | Yes                            | Moderate                          |
| Bogogiannidou (University of Thessaly) <sup>52</sup>                       | 2020-04-30              | No                                | No                                  | Yes                          | Yes                                  | Yes                             | No                              | Yes                                 | Yes                          | Unclear                        | Moderate                          |
| <b>Ireland</b>                                                             |                         |                                   |                                     |                              |                                      |                                 |                                 |                                     |                              |                                |                                   |
| Igoe (HSE Health Protection Surveillance Centre (HPSC)) <sup>53</sup>      | 2020-07-16              | Yes                               | Yes                                 | Yes                          | No                                   | Unclear                         | Yes                             | Yes                                 | No                           | No                             | Moderate                          |
| <b>Israel</b>                                                              |                         |                                   |                                     |                              |                                      |                                 |                                 |                                     |                              |                                |                                   |
| Bachner (Israeli Pandemic Task Force) <sup>54,55</sup>                     | 2020-06-02              | Yes                               | Yes                                 | Yes                          | No                                   | Yes                             | Unclear                         | Unclear                             | No                           | Unclear                        | High                              |
| <b>Italy</b>                                                               |                         |                                   |                                     |                              |                                      |                                 |                                 |                                     |                              |                                |                                   |
| Norsa (Papa Giovanni XXII) <sup>204</sup>                                  | 2020-07-10              | No                                | No                                  | No                           | Yes                                  | Yes                             | Unclear                         | Yes                                 | No                           | Yes                            | High                              |



| Article Author<br>(Study Organization)                            | Sampling End<br>Date<br>(YMD) | Item 1:<br>Appropriate<br>sample<br>frame* | Item 2:<br>Probability<br>sampling<br>method | Item 3:<br>Adequate<br>sample<br>size | Item 4:<br>Subjects &<br>setting<br>described | Item 5:<br>Good<br>coverage of<br>sample | Item 6: Sens<br>> 90% &<br>spec > 95% | Item 7: Same<br>tests for all<br>subjects | Item 8:<br>Appropriate<br>analysis | Item 9:<br>Adequate<br>response<br>rate | Overall Risk of<br>Bias† |
|-------------------------------------------------------------------|-------------------------------|--------------------------------------------|----------------------------------------------|---------------------------------------|-----------------------------------------------|------------------------------------------|---------------------------------------|-------------------------------------------|------------------------------------|-----------------------------------------|--------------------------|
| Pagani (Università degli<br>Studi di Milano) <sup>56</sup>        | 2020-06-07                    | Yes                                        | Yes                                          | No                                    | Yes                                           | Yes                                      | Unclear                               | Yes                                       | No                                 | Yes                                     | Moderate                 |
| Cosma (University of Turin)<br><sup>205</sup>                     | 2020-06-04                    | Yes                                        | No                                           | No                                    | No                                            | Unclear                                  | Unclear                               | Yes                                       | No                                 | Unclear                                 | High                     |
| Amante (Bergamo Health<br>Agency) <sup>57</sup>                   | 2020-06-03                    | Yes                                        | Unclear                                      | Yes                                   | No                                            | Yes                                      | Unclear                               | Unclear                                   | No                                 | Unclear                                 | Moderate                 |
| Lorenzo (Santagostino<br>Medical Center) <sup>206</sup>           | 2020-05-31                    | Yes                                        | No                                           | No                                    | No                                            | Unclear                                  | Unclear                               | Yes                                       | No                                 | Unclear                                 | High                     |
| Fiore (University of Foggia)<br><sup>58</sup>                     | 2020-05-31                    | No                                         | No                                           | Yes                                   | Yes                                           | Unclear                                  | No                                    | Yes                                       | No                                 | Yes                                     | High                     |
| Sandri (Humanitas Clinical<br>and Research Center) <sup>208</sup> | 2020-05-16                    | Yes                                        | No                                           | Yes                                   | Yes                                           | Unclear                                  | Yes                                   | Yes                                       | No                                 | Yes                                     | Moderate                 |
| Cavaliere (Santo Stefano<br>Hospital) <sup>207</sup>              | 2020-05-16                    | Yes                                        | No                                           | No                                    | No                                            | Unclear                                  | Unclear                               | Yes                                       | No                                 | Yes                                     | High                     |
| Carozzi (Arezzo Hospital) <sup>211</sup>                          | 2020-04-30                    | Yes                                        | No                                           | Yes                                   | No                                            | Unclear                                  | No                                    | No                                        | No                                 | Unclear                                 | High                     |
| Denina (University of Turin)<br><sup>209</sup>                    | 2020-04-30                    | Yes                                        | No                                           | No                                    | Yes                                           | Unclear                                  | Unclear                               | No                                        | No                                 | Unclear                                 | High                     |
| Vena (University of Genoa)<br><sup>210</sup>                      | 2020-04-30                    | No                                         | No                                           | Yes                                   | Yes                                           | Yes                                      | Yes                                   | No                                        | No                                 | Unclear                                 | High                     |
| Landro (Hospital of<br>Bergamo) <sup>59</sup>                     | 2020-04-28                    | Yes                                        | Unclear                                      | Yes                                   | No                                            | Unclear                                  | Unclear                               | Unclear                                   | No                                 | Unclear                                 | Unclear                  |
| Lahner (University of<br>Rome) <sup>213</sup>                     | 2020-04-27                    | No                                         | Yes                                          | Yes                                   | No                                            | Yes                                      | No                                    | Yes                                       | No                                 | Unclear                                 | High                     |
| Volta (University of Brescia)<br><sup>212</sup>                   | 2020-04-27                    | No                                         | No                                           | No                                    | Yes                                           | Yes                                      | Unclear                               | Yes                                       | No                                 | Yes                                     | High                     |
| Landro (Hospital of<br>Bergamo) <sup>59</sup>                     | 2020-04-24                    | Yes                                        | Unclear                                      | Yes                                   | No                                            | Unclear                                  | Unclear                               | Unclear                                   | No                                 | Unclear                                 | Unclear                  |
| Paradiso (Istituto Tumori G.<br>Paolo II) <sup>214</sup>          | 2020-04-17                    | No                                         | No                                           | Yes                                   | Yes                                           | Unclear                                  | Yes                                   | Yes                                       | No                                 | Yes                                     | High                     |

| Article Author<br>(Study Organization)                                      | Sampling End<br>Date<br>(YMD) | Item 1:<br>Appropriate<br>sample<br>frame* | Item 2:<br>Probability<br>sampling<br>method | Item 3:<br>Adequate<br>sample<br>size | Item 4:<br>Subjects &<br>setting<br>described | Item 5:<br>Good<br>coverage of<br>sample | Item 6: Sens<br>> 90% &<br>spec > 95% | Item 7: Same<br>tests for all<br>subjects | Item 8:<br>Appropriate<br>analysis | Item 9:<br>Adequate<br>response<br>rate | Overall Risk of<br>Bias <sup>†</sup> |
|-----------------------------------------------------------------------------|-------------------------------|--------------------------------------------|----------------------------------------------|---------------------------------------|-----------------------------------------------|------------------------------------------|---------------------------------------|-------------------------------------------|------------------------------------|-----------------------------------------|--------------------------------------|
| Sotgiu (Università degli<br>Studi di Milano) <sup>215</sup>                 | 2020-04-16                    | Yes                                        | No                                           | No                                    | Yes                                           | Yes                                      | No                                    | Yes                                       | No                                 | Unclear                                 | High                                 |
| Amendola (University of<br>Milan) <sup>216</sup>                            | 2020-04-15                    | No                                         | No                                           | Yes                                   | No                                            | Unclear                                  | Unclear                               | Yes                                       | No                                 | Yes                                     | High                                 |
| Valenti (Fondazione IRCCS<br>Ca' Granda Ospedale<br>Maggior) <sup>60</sup>  | 2020-04-08                    | No                                         | Yes                                          | Yes                                   | Yes                                           | Unclear                                  | Yes                                   | Yes                                       | No                                 | Yes                                     | Moderate                             |
| Percivalle (IRCCS<br>Policlinico San Matteo) <sup>61</sup>                  | 2020-04-06                    | No                                         | Unclear                                      | No                                    | No                                            | Yes                                      | Yes                                   | Yes                                       | No                                 | Unclear                                 | High                                 |
| Fusco (D. Cotugno'<br>Hospital) <sup>217</sup>                              | 2020-04-02                    | No                                         | No                                           | No                                    | Yes                                           | Yes                                      | Unclear                               | Yes                                       | No                                 | Unclear                                 | High                                 |
| Milani (University of<br>Milan) <sup>62</sup>                               | 2020-03-31                    | Yes                                        | No                                           | No                                    | No                                            | No                                       | Unclear                               | Yes                                       | No                                 | Yes                                     | High                                 |
| Pancrazzi (Ospedale San<br>Donato) <sup>218</sup>                           | 2020-03-21                    | Yes                                        | No                                           | No                                    | No                                            | No                                       | No                                    | Yes                                       | No                                 | Unclear                                 | High                                 |
| <b>Japan</b>                                                                |                               |                                            |                                              |                                       |                                               |                                          |                                       |                                           |                                    |                                         |                                      |
| Nawa (Tokyo Medical and<br>Dental University) <sup>63</sup>                 | 2020-07-05                    | Yes                                        | Yes                                          | Yes                                   | Yes                                           | Yes                                      | Yes                                   | Yes                                       | No                                 | No                                      | Moderate                             |
| Chong (Kanenokuma<br>Hospital) <sup>219</sup>                               | 2020-06-15                    | Yes                                        | No                                           | No                                    | No                                            | Yes                                      | Unclear                               | Yes                                       | No                                 | No                                      | High                                 |
| Suda (Hokkaido University<br>Graduate School of<br>Medicine) <sup>220</sup> | 2020-05-31                    | No                                         | No                                           | No                                    | Yes                                           | Yes                                      | Yes                                   | Yes                                       | No                                 | Yes                                     | High                                 |
| Nakamura (Iwate Prefectural<br>Central Hospital) <sup>221</sup>             | 2020-05-29                    | Yes                                        | Unclear                                      | Yes                                   | Yes                                           | Unclear                                  | Yes                                   | Yes                                       | No                                 | Unclear                                 | High                                 |
| Takita (Navitas Clinic<br>Tachikawa) <sup>64,65</sup>                       | 2020-05-20                    | No                                         | No                                           | Yes                                   | Yes                                           | Unclear                                  | No                                    | Yes                                       | No                                 | Unclear                                 | High                                 |
| Jiji (SoftBank) <sup>222,223</sup>                                          | 2020-05-18                    | Yes                                        | No                                           | Yes                                   | No                                            | Unclear                                  | Unclear                               | Unclear                                   | Unclear                            | Unclear                                 | Unclear                              |

| Article Author<br>(Study Organization)                                            | Sampling End<br>Date<br>(YMD) | Item 1:<br>Appropriate<br>sample<br>frame* | Item 2:<br>Probability<br>sampling<br>method | Item 3:<br>Adequate<br>sample<br>size | Item 4:<br>Subjects &<br>setting<br>described | Item 5:<br>Good<br>coverage of<br>sample | Item 6: Sens<br>> 90% &<br>spec > 95% | Item 7: Same<br>tests for all<br>subjects | Item 8:<br>Appropriate<br>analysis | Item 9:<br>Adequate<br>response<br>rate | Overall Risk of<br>Bias† |
|-----------------------------------------------------------------------------------|-------------------------------|--------------------------------------------|----------------------------------------------|---------------------------------------|-----------------------------------------------|------------------------------------------|---------------------------------------|-------------------------------------------|------------------------------------|-----------------------------------------|--------------------------|
| Fujita (National Hospital<br>Organization Kyoto Medical<br>Center) <sup>224</sup> | 2020-04-20                    | No                                         | No                                           | No                                    | Yes                                           | Unclear                                  | Unclear                               | Yes                                       | No                                 | Unclear                                 | High                     |
| Doi (Kobe City Medical<br>Center General Hospital) <sup>225</sup>                 | 2020-04-07                    | No                                         | Yes                                          | Yes                                   | No                                            | Unclear                                  | Yes                                   | Yes                                       | No                                 | Unclear                                 | High                     |
| Suda (Hokkaido University<br>Graduate School of<br>Medicine) <sup>220</sup>       | 2020-03-31                    | No                                         | No                                           | No                                    | Yes                                           | Yes                                      | Yes                                   | Yes                                       | No                                 | Yes                                     | High                     |
| <b>Luxembourg</b>                                                                 |                               |                                            |                                              |                                       |                                               |                                          |                                       |                                           |                                    |                                         |                          |
| Snoeck (Luxembourg<br>Institute of Health) <sup>66</sup>                          | 2020-05-05                    | Yes                                        | Yes                                          | Yes                                   | Yes                                           | Yes                                      | No                                    | Yes                                       | No                                 | Unclear                                 | Moderate                 |
| <b>Netherlands</b>                                                                |                               |                                            |                                              |                                       |                                               |                                          |                                       |                                           |                                    |                                         |                          |
| Slot (Amsterdam UMC) <sup>67</sup>                                                | 2020-04-15                    | No                                         | Yes                                          | Yes                                   | No                                            | Yes                                      | Yes                                   | Yes                                       | No                                 | Yes                                     | Moderate                 |
| Westerhuis (Erasmus<br>Medical Centre) <sup>226</sup>                             | 2020-04-07                    | No                                         | No                                           | Yes                                   | No                                            | Unclear                                  | Unclear                               | Yes                                       | No                                 | Unclear                                 | High                     |
| Westerhuis (Erasmus<br>Medical Centre) <sup>226</sup>                             | 2020-03-06                    | No                                         | No                                           | Yes                                   | No                                            | Unclear                                  | Unclear                               | Yes                                       | No                                 | Unclear                                 | High                     |
| <b>Norway</b>                                                                     |                               |                                            |                                              |                                       |                                               |                                          |                                       |                                           |                                    |                                         |                          |
| Tunheim (Norwegian<br>Institute of Public Health) <sup>68</sup>                   | 2020-05-17                    | No                                         | No                                           | Yes                                   | Yes                                           | Yes                                      | No                                    | Yes                                       | Yes                                | Unclear                                 | Moderate                 |
| Cox (University of Bergen)<br><sup>227</sup>                                      | 2020-04-04                    | Yes                                        | No                                           | No                                    | No                                            | Unclear                                  | Unclear                               | Yes                                       | No                                 | Unclear                                 | High                     |
| <b>Portugal</b>                                                                   |                               |                                            |                                              |                                       |                                               |                                          |                                       |                                           |                                    |                                         |                          |
| Rodrigues (Instituto<br>Nacional de Saúde Doutor<br>Ricardo Jorge) <sup>69</sup>  | 2020-07-08                    | Yes                                        | No                                           | Yes                                   | Yes                                           | Yes                                      | Yes                                   | Yes                                       | No                                 | Unclear                                 | Moderate                 |
| <b>Republic of Korea</b>                                                          |                               |                                            |                                              |                                       |                                               |                                          |                                       |                                           |                                    |                                         |                          |

| Article Author<br>(Study Organization)                                          | Sampling End<br>Date<br>(YMD) | Item 1:<br>Appropriate<br>sample<br>frame* | Item 2:<br>Probability<br>sampling<br>method | Item 3:<br>Adequate<br>sample<br>size | Item 4:<br>Subjects &<br>setting<br>described | Item 5:<br>Good<br>coverage of<br>sample | Item 6: Sens<br>> 90% &<br>spec > 95% | Item 7: Same<br>tests for all<br>subjects | Item 8:<br>Appropriate<br>analysis | Item 9:<br>Adequate<br>response<br>rate | Overall Risk of<br>Bias† |
|---------------------------------------------------------------------------------|-------------------------------|--------------------------------------------|----------------------------------------------|---------------------------------------|-----------------------------------------------|------------------------------------------|---------------------------------------|-------------------------------------------|------------------------------------|-----------------------------------------|--------------------------|
| Ji-Ho (Korea Centers for<br>Disease Control and<br>Prevention) <sup>70,71</sup> | 2020-07-09                    | No                                         | Unclear                                      | Yes                                   | No                                            | Unclear                                  | Unclear                               | Unclear                                   | No                                 | Unclear                                 | Unclear                  |
| Song (Daegu Catholic<br>University Hospital) <sup>228</sup>                     | 2020-06-05                    | No                                         | No                                           | No                                    | Yes                                           | Unclear                                  | No                                    | Yes                                       | No                                 | Unclear                                 | High                     |
| Noh (Korea University) <sup>72</sup>                                            | 2020-05-29                    | No                                         | No                                           | Yes                                   | Yes                                           | Unclear                                  | Yes                                   | Yes                                       | No                                 | Unclear                                 | High                     |
| <b>Singapore</b>                                                                |                               |                                            |                                              |                                       |                                               |                                          |                                       |                                           |                                    |                                         |                          |
| Kurohi (Singapore National<br>Centre for Infectious<br>Diseases) <sup>73</sup>  | 2020-04-15                    | Yes                                        | Unclear                                      | Yes                                   | No                                            | Unclear                                  | Unclear                               | Unclear                                   | No                                 | Unclear                                 | Unclear                  |
| Kurohi (Singapore National<br>Centre for Infectious<br>Diseases) <sup>73</sup>  | 2020-04-15                    | Yes                                        | Unclear                                      | Yes                                   | No                                            | Unclear                                  | Unclear                               | Unclear                                   | No                                 | Unclear                                 | Unclear                  |
| <b>Spain</b>                                                                    |                               |                                            |                                              |                                       |                                               |                                          |                                       |                                           |                                    |                                         |                          |
| Flores (Municipality of<br>Torrejon de Ardoz) <sup>74</sup>                     | 2020-06-03                    | Yes                                        | Yes                                          | Yes                                   | No                                            | Yes                                      | Unclear                               | Unclear                                   | No                                 | Yes                                     | Moderate                 |
| Fernández-Rivas (Institut<br>Catala de la Salut) <sup>229</sup>                 | 2020-05-22                    | No                                         | Yes                                          | Yes                                   | Yes                                           | Yes                                      | Yes                                   | Yes                                       | No                                 | Yes                                     | Moderate                 |
| Soriano (Universidad<br>Autónoma de Madrid) <sup>230</sup>                      | 2020-05-16                    | No                                         | Yes                                          | Yes                                   | Yes                                           | No                                       | Unclear                               | Yes                                       | No                                 | Yes                                     | High                     |
| Fernandez (Hospital<br>Universitario de<br>Fuenlabrada) <sup>231</sup>          | 2020-05-13                    | No                                         | Yes                                          | Yes                                   | No                                            | Yes                                      | Unclear                               | Yes                                       | No                                 | Yes                                     | High                     |
| Pollán (Institute of Health<br>Carlos III) <sup>75</sup>                        | 2020-05-11                    | Yes                                        | Yes                                          | Yes                                   | Yes                                           | Yes                                      | Yes                                   | Yes                                       | Yes                                | Yes                                     | Low                      |
| Valdivia (Hospital Clínico<br>Universitario) <sup>232</sup>                     | 2020-04-30                    | No                                         | Unclear                                      | Yes                                   | No                                            | Unclear                                  | No                                    | Yes                                       | No                                 | Unclear                                 | High                     |

| Article Author<br>(Study Organization)                                                       | Sampling End<br>Date<br>(YMD) | Item 1:<br>Appropriate<br>sample<br>frame* | Item 2:<br>Probability<br>sampling<br>method | Item 3:<br>Adequate<br>sample<br>size | Item 4:<br>Subjects &<br>setting<br>described | Item 5:<br>Good<br>coverage of<br>sample | Item 6: Sens<br>> 90% &<br>spec > 95% | Item 7: Same<br>tests for all<br>subjects | Item 8:<br>Appropriate<br>analysis | Item 9:<br>Adequate<br>response<br>rate | Overall Risk of<br>Bias† |
|----------------------------------------------------------------------------------------------|-------------------------------|--------------------------------------------|----------------------------------------------|---------------------------------------|-----------------------------------------------|------------------------------------------|---------------------------------------|-------------------------------------------|------------------------------------|-----------------------------------------|--------------------------|
| Galan (Hospital<br>Universitario Fundación<br>Alcorcón) <sup>233</sup>                       | 2020-04-27                    | No                                         | Yes                                          | Yes                                   | Yes                                           | Yes                                      | No                                    | Yes                                       | No                                 | Yes                                     | High                     |
| Olalla (Hospital Costa del<br>Sol) <sup>234</sup>                                            | 2020-04-25                    | Yes                                        | No                                           | No                                    | Yes                                           | Yes                                      | Unclear                               | Yes                                       | No                                 | Unclear                                 | High                     |
| Martin (Gerencia de<br>Atención Primaria del Área<br>de Salud de León, Spain) <sup>235</sup> | 2020-04-15                    | Yes                                        | No                                           | Yes                                   | Yes                                           | Unclear                                  | No                                    | Yes                                       | No                                 | Yes                                     | High                     |
| Garcia-Basteiro (Universitat<br>de Barcelona) <sup>236</sup>                                 | 2020-04-09                    | Yes                                        | Yes                                          | No                                    | Yes                                           | Yes                                      | Yes                                   | Yes                                       | No                                 | Yes                                     | Moderate                 |
| <b>Sweden</b>                                                                                |                               |                                            |                                              |                                       |                                               |                                          |                                       |                                           |                                    |                                         |                          |
| The Local News Sweden<br>(Werlabs) <sup>76</sup>                                             | 2020-07-22                    | Yes                                        | No                                           | Yes                                   | No                                            | Unclear                                  | Unclear                               | Unclear                                   | No                                 | Unclear                                 | High                     |
| Stockholm Region<br>Government (Sweden Public<br>Health Authority) <sup>77</sup>             | 2020-07-15                    | Yes                                        | No                                           | Yes                                   | No                                            | Unclear                                  | Unclear                               | Unclear                                   | No                                 | Unclear                                 | High                     |
| Lidström (Uppsala<br>University) <sup>237</sup>                                              | 2020-06-25                    | Yes                                        | Yes                                          | Yes                                   | Yes                                           | Yes                                      | Unclear                               | Yes                                       | No                                 | Yes                                     | Moderate                 |
| Lundkvist (Uppsala<br>University) <sup>78</sup>                                              | 2020-06-18                    | Yes                                        | Yes                                          | No                                    | Yes                                           | Unclear                                  | Yes                                   | Yes                                       | No                                 | Unclear                                 | High                     |
| Lundkvist (Uppsala<br>University) <sup>78</sup>                                              | 2020-06-18                    | Yes                                        | Yes                                          | No                                    | Yes                                           | Unclear                                  | Yes                                   | Yes                                       | No                                 | Unclear                                 | High                     |
| Sweden Public Health<br>Authority <sup>79</sup>                                              | 2020-06-14                    | No                                         | No                                           | Yes                                   | No                                            | Unclear                                  | Yes                                   | Yes                                       | No                                 | Unclear                                 | High                     |
| Sweden Public Health<br>Authority <sup>79</sup>                                              | 2020-06-07                    | No                                         | No                                           | Yes                                   | No                                            | Unclear                                  | Yes                                   | Yes                                       | No                                 | Unclear                                 | High                     |
| Sweden Public Health<br>Authority <sup>79</sup>                                              | 2020-05-31                    | No                                         | No                                           | Yes                                   | No                                            | Unclear                                  | Yes                                   | Yes                                       | No                                 | Unclear                                 | High                     |
| Sweden Public Health<br>Authority <sup>79</sup>                                              | 2020-05-24                    | No                                         | No                                           | Yes                                   | No                                            | Unclear                                  | Yes                                   | Yes                                       | No                                 | Unclear                                 | High                     |

| Article Author<br>(Study Organization)                      | Sampling End<br>Date<br>(YMD) | Item 1:<br>Appropriate<br>sample<br>frame* | Item 2:<br>Probability<br>sampling<br>method | Item 3:<br>Adequate<br>sample<br>size | Item 4:<br>Subjects &<br>setting<br>described | Item 5:<br>Good<br>coverage of<br>sample | Item 6: Sens<br>> 90% &<br>spec > 95% | Item 7: Same<br>tests for all<br>subjects | Item 8:<br>Appropriate<br>analysis | Item 9:<br>Adequate<br>response<br>rate | Overall Risk of<br>Bias† |
|-------------------------------------------------------------|-------------------------------|--------------------------------------------|----------------------------------------------|---------------------------------------|-----------------------------------------------|------------------------------------------|---------------------------------------|-------------------------------------------|------------------------------------|-----------------------------------------|--------------------------|
| Roxhed (KTH Royal<br>Institute of Technology) <sup>80</sup> | 2020-05-21                    | Yes                                        | Yes                                          | Yes                                   | Yes                                           | Unclear                                  | Yes                                   | Yes                                       | No                                 | No                                      | Moderate                 |
| Sweden Public Health<br>Authority <sup>79</sup>             | 2020-05-17                    | No                                         | No                                           | Yes                                   | No                                            | Unclear                                  | Yes                                   | Yes                                       | No                                 | Unclear                                 | High                     |
| Sweden Public Health<br>Authority <sup>79</sup>             | 2020-05-10                    | No                                         | No                                           | Yes                                   | No                                            | Unclear                                  | Yes                                   | Yes                                       | No                                 | Unclear                                 | High                     |
| Rudberg (Danderyd<br>Hospital) <sup>238</sup>               | 2020-05-08                    | No                                         | Yes                                          | Yes                                   | Yes                                           | No                                       | Yes                                   | Yes                                       | No                                 | No                                      | Moderate                 |
| Sweden Public Health<br>Authority <sup>79</sup>             | 2020-05-03                    | No                                         | No                                           | Yes                                   | No                                            | Unclear                                  | Yes                                   | Yes                                       | No                                 | Unclear                                 | High                     |
| Sweden Public Health<br>Authority <sup>79</sup>             | 2020-04-26                    | No                                         | No                                           | Yes                                   | No                                            | Unclear                                  | Yes                                   | Yes                                       | No                                 | Unclear                                 | High                     |
| Lindhall (Uppsala<br>University) <sup>239</sup>             | 2020-04-20                    | Yes                                        | No                                           | Yes                                   | No                                            | Unclear                                  | Yes                                   | Yes                                       | No                                 | Unclear                                 | High                     |
| <b>Switzerland</b>                                          |                               |                                            |                                              |                                       |                                               |                                          |                                       |                                           |                                    |                                         |                          |
| Fenwick (University of<br>Lausanne) <sup>81</sup>           | 2020-06-27                    | Yes                                        | Yes                                          | No                                    | No                                            | Unclear                                  | Yes                                   | Yes                                       | No                                 | Unclear                                 | High                     |
| Stringhini (Geneva<br>University Hospitals) <sup>82</sup>   | 2020-05-09                    | Yes                                        | Yes                                          | Yes                                   | Yes                                           | Unclear                                  | Yes                                   | Yes                                       | No                                 | No                                      | Moderate                 |
| <b>United Kingdom</b>                                       |                               |                                            |                                              |                                       |                                               |                                          |                                       |                                           |                                    |                                         |                          |
| Public Health England <sup>83</sup>                         | 2020-08-16                    | No                                         | Yes                                          | Yes                                   | No                                            | Unclear                                  | No                                    | Yes                                       | Yes                                | Unclear                                 | Moderate                 |
| Public Health Scotland <sup>84</sup>                        | 2020-08-09                    | No                                         | No                                           | Yes                                   | No                                            | Unclear                                  | Unclear                               | Unclear                                   | No                                 | Unclear                                 | High                     |
| Public Health England <sup>85</sup>                         | 2020-08-02                    | Yes                                        | Yes                                          | Yes                                   | No                                            | Yes                                      | Unclear                               | Yes                                       | No                                 | Unclear                                 | Moderate                 |
| Public Health England <sup>85</sup>                         | 2020-08-02                    | Yes                                        | Yes                                          | No                                    | No                                            | Yes                                      | Yes                                   | Yes                                       | Yes                                | Unclear                                 | Moderate                 |
| Office of National Statistics<br><sup>86</sup>              | 2020-07-26                    | Yes                                        | Yes                                          | Yes                                   | No                                            | Yes                                      | Yes                                   | Yes                                       | No                                 | No                                      | Moderate                 |

| Article Author (Study Organization)                                 | Sampling End Date (YMD) | Item 1: Appropriate sample frame* | Item 2: Probability sampling method | Item 3: Adequate sample size | Item 4: Subjects & setting described | Item 5: Good coverage of sample | Item 6: Sens > 90% & spec > 95% | Item 7: Same tests for all subjects | Item 8: Appropriate analysis | Item 9: Adequate response rate | Overall Risk of Bias <sup>†</sup> |
|---------------------------------------------------------------------|-------------------------|-----------------------------------|-------------------------------------|------------------------------|--------------------------------------|---------------------------------|---------------------------------|-------------------------------------|------------------------------|--------------------------------|-----------------------------------|
| Public Health England <sup>83</sup>                                 | 2020-07-21              | No                                | Yes                                 | Yes                          | No                                   | Unclear                         | No                              | Yes                                 | Yes                          | Unclear                        | Moderate                          |
| Ward (Imperial College London) <sup>87</sup>                        | 2020-07-13              | Yes                               | Yes                                 | Yes                          | Yes                                  | Yes                             | No                              | Yes                                 | Yes                          | Yes                            | Low                               |
| Office of National Statistics <sup>88</sup>                         | 2020-07-08              | Yes                               | No                                  | Yes                          | No                                   | Unclear                         | Unclear                         | Yes                                 | No                           | Unclear                        | Moderate                          |
| Public Health England <sup>83</sup>                                 | 2020-07-06              | No                                | Yes                                 | Yes                          | No                                   | Unclear                         | No                              | Yes                                 | Yes                          | Unclear                        | Moderate                          |
| Public Health England <sup>89</sup>                                 | 2020-06-30              | No                                | Yes                                 | Yes                          | No                                   | Unclear                         | Yes                             | Yes                                 | Yes                          | Unclear                        | Moderate                          |
| Public Health Scotland <sup>84</sup>                                | 2020-06-21              | No                                | No                                  | Yes                          | No                                   | Unclear                         | Unclear                         | Unclear                             | No                           | Unclear                        | High                              |
| Gulraj (Gibraltar Government) <sup>240</sup>                        | 2020-06-17              | Yes                               | Unclear                             | Yes                          | No                                   | Unclear                         | Unclear                         | Unclear                             | No                           | Unclear                        | Unclear                           |
| Pallett (Chelsea and Westminster Hospital NHS Trust) <sup>241</sup> | 2020-06-12              | Yes                               | No                                  | No                           | Yes                                  | No                              | No                              | Yes                                 | No                           | No                             | High                              |
| Eyre (Oxford University Hospital) <sup>242</sup>                    | 2020-06-08              | Yes                               | No                                  | Yes                          | Yes                                  | Yes                             | Yes                             | No                                  | No                           | Unclear                        | Moderate                          |
| Public Health England <sup>83</sup>                                 | 2020-06-08              | No                                | Yes                                 | Yes                          | No                                   | Unclear                         | No                              | Yes                                 | Yes                          | Unclear                        | Moderate                          |
| Grant (Whittington Health NHS Trust) <sup>244</sup>                 | 2020-06-05              | Yes                               | No                                  | Yes                          | No                                   | Yes                             | Yes                             | Yes                                 | No                           | No                             | High                              |
| Bampoe (University College London) <sup>243</sup>                   | 2020-06-05              | Yes                               | Unclear                             | No                           | Yes                                  | No                              | Yes                             | Yes                                 | No                           | Unclear                        | High                              |
| Wells (King's College London) <sup>90</sup>                         | 2020-06-02              | No                                | Unclear                             | No                           | Yes                                  | Unclear                         | Yes                             | Yes                                 | No                           | No                             | High                              |
| Public Health England <sup>85</sup>                                 | 2020-05-31              | Yes                               | Yes                                 | Yes                          | No                                   | Yes                             | Yes                             | Yes                                 | No                           | Unclear                        | Moderate                          |
| Public Health England <sup>85</sup>                                 | 2020-05-31              | Yes                               | Yes                                 | No                           | No                                   | Yes                             | Yes                             | Yes                                 | Yes                          | Unclear                        | Moderate                          |
| Khalil (St George's University of London)                           | 2020-05-28              | No                                | No                                  | No                           | No                                   | Unclear                         | Yes                             | Yes                                 | No                           | Unclear                        | High                              |

| Article Author<br>(Study Organization)                              | Sampling End<br>Date<br>(YMD) | Item 1:<br>Appropriate<br>sample<br>frame* | Item 2:<br>Probability<br>sampling<br>method | Item 3:<br>Adequate<br>sample<br>size | Item 4:<br>Subjects &<br>setting<br>described | Item 5:<br>Good<br>coverage of<br>sample | Item 6: Sens<br>> 90% &<br>spec > 95% | Item 7: Same<br>tests for all<br>subjects | Item 8:<br>Appropriate<br>analysis | Item 9:<br>Adequate<br>response<br>rate | Overall Risk of<br>Bias† |
|---------------------------------------------------------------------|-------------------------------|--------------------------------------------|----------------------------------------------|---------------------------------------|-----------------------------------------------|------------------------------------------|---------------------------------------|-------------------------------------------|------------------------------------|-----------------------------------------|--------------------------|
| 245                                                                 |                               |                                            |                                              |                                       |                                               |                                          |                                       |                                           |                                    |                                         |                          |
| Jersey Government<br>(Statistics Jersey) <sup>91</sup>              | 2020-05-27                    | Yes                                        | Yes                                          | Yes                                   | No                                            | Unclear                                  | Yes                                   | Yes                                       | Yes                                | No                                      | Moderate                 |
| Public Health England <sup>83</sup>                                 | 2020-05-22                    | No                                         | Yes                                          | Yes                                   | No                                            | Unclear                                  | No                                    | Yes                                       | Yes                                | Unclear                                 | Moderate                 |
| Thompson (University of<br>Oxford) <sup>92</sup>                    | 2020-05-18                    | No                                         | No                                           | Yes                                   | No                                            | Unclear                                  | Yes                                   | Yes                                       | No                                 | Unclear                                 | High                     |
| Poulikakos (Salford Royal<br>NHS Foundation Trust) <sup>246</sup>   | 2020-05-06                    | Yes                                        | No                                           | No                                    | No                                            | No                                       | Unclear                               | Yes                                       | No                                 | Unclear                                 | High                     |
| Public Health England <sup>85</sup>                                 | 2020-04-30                    | Yes                                        | Yes                                          | Yes                                   | No                                            | Yes                                      | Yes                                   | Yes                                       | Yes                                | Unclear                                 | Moderate                 |
| Public Health England <sup>85</sup>                                 | 2020-04-30                    | Yes                                        | Yes                                          | No                                    | No                                            | Yes                                      | Yes                                   | Yes                                       | Yes                                | Unclear                                 | Moderate                 |
| Shields (University of<br>Birmingham) <sup>247</sup>                | 2020-04-26                    | Yes                                        | No                                           | No                                    | No                                            | Unclear                                  | Yes                                   | Yes                                       | No                                 | Unclear                                 | High                     |
| Public Health England <sup>83</sup>                                 | 2020-04-26                    | No                                         | Yes                                          | Yes                                   | No                                            | Unclear                                  | No                                    | Yes                                       | Yes                                | Unclear                                 | Moderate                 |
| Sikora (Rutherford Health)<br><sup>248</sup>                        | 2020-04-24                    | Yes                                        | No                                           | No                                    | No                                            | Unclear                                  | Unclear                               | Yes                                       | No                                 | Unclear                                 | High                     |
| Public Health England <sup>83</sup>                                 | 2020-04-24                    | No                                         | Yes                                          | Yes                                   | No                                            | Unclear                                  | No                                    | Yes                                       | Yes                                | Unclear                                 | Moderate                 |
| Thompson (University of<br>Oxford) <sup>92</sup>                    | 2020-04-20                    | No                                         | No                                           | Yes                                   | No                                            | Unclear                                  | Yes                                   | Yes                                       | No                                 | Unclear                                 | High                     |
| Public Health England <sup>83</sup>                                 | 2020-04-20                    | No                                         | Yes                                          | Yes                                   | No                                            | Unclear                                  | No                                    | Yes                                       | Yes                                | Unclear                                 | Moderate                 |
| Public Health England <sup>83</sup>                                 | 2020-04-16                    | No                                         | Yes                                          | Yes                                   | No                                            | Unclear                                  | No                                    | Yes                                       | Yes                                | Unclear                                 | Moderate                 |
| Public Health England <sup>83</sup>                                 | 2020-04-13                    | No                                         | Yes                                          | Yes                                   | No                                            | Unclear                                  | No                                    | Yes                                       | Yes                                | Unclear                                 | Moderate                 |
| Houlihan (University<br>College London<br>Hospitals) <sup>310</sup> | 2020-04-08                    | Yes                                        | No                                           | No                                    | Yes                                           | Yes                                      | Unclear                               | Yes                                       | No                                 | Unclear                                 | High                     |
| Public Health England <sup>83</sup>                                 | 2020-04-03                    | No                                         | Yes                                          | Yes                                   | No                                            | Unclear                                  | No                                    | Yes                                       | Yes                                | Unclear                                 | Moderate                 |



| Article Author<br>(Study Organization)                                                                 | Sampling End<br>Date<br>(YMD) | Item 1:<br>Appropriate<br>sample<br>frame* | Item 2:<br>Probability<br>sampling<br>method | Item 3:<br>Adequate<br>sample<br>size | Item 4:<br>Subjects &<br>setting<br>described | Item 5:<br>Good<br>coverage of<br>sample | Item 6: Sens<br>> 90% &<br>spec > 95% | Item 7: Same<br>tests for all<br>subjects | Item 8:<br>Appropriate<br>analysis | Item 9:<br>Adequate<br>response<br>rate | Overall Risk of<br>Bias† |
|--------------------------------------------------------------------------------------------------------|-------------------------------|--------------------------------------------|----------------------------------------------|---------------------------------------|-----------------------------------------------|------------------------------------------|---------------------------------------|-------------------------------------------|------------------------------------|-----------------------------------------|--------------------------|
| Public Health England <sup>85</sup>                                                                    | 2020-03-31                    | Yes                                        | Yes                                          | No                                    | No                                            | Yes                                      | Yes                                   | Yes                                       | Yes                                | Unclear                                 | Moderate                 |
| Public Health England <sup>85</sup>                                                                    | 2020-03-31                    | Yes                                        | Yes                                          | No                                    | No                                            | Yes                                      | Yes                                   | Yes                                       | Yes                                | Unclear                                 | Moderate                 |
| Public Health England <sup>83</sup>                                                                    | 2020-03-27                    | No                                         | Yes                                          | Yes                                   | No                                            | Unclear                                  | No                                    | Yes                                       | Yes                                | Unclear                                 | Moderate                 |
| Favara (The Queen Elizabeth<br>Hospital King's Lynn NHS<br>Foundation Trust)<br><small>249 250</small> | 2006-07-20                    | Yes                                        | Yes                                          | No                                    | No                                            | Unclear                                  | No                                    | Yes                                       | No                                 | Yes                                     | High                     |
| <b>United States of America</b>                                                                        |                               |                                            |                                              |                                       |                                               |                                          |                                       |                                           |                                    |                                         |                          |
| ABC7 (Riverside University<br>Health System) <sup>93-95</sup>                                          | 2020-07-20                    | Yes                                        | Yes                                          | Yes                                   | No                                            | Unclear                                  | Unclear                               | Unclear                                   | No                                 | Unclear                                 | Unclear                  |
| Zauzmer (Washington DC<br>Public Health) <sup>96</sup>                                                 | 2020-07-15                    | Yes                                        | No                                           | Yes                                   | No                                            | Unclear                                  | Unclear                               | No                                        | No                                 | Unclear                                 | High                     |
| Viglienzoni (University of<br>Vermont) <sup>97</sup>                                                   | 2020-06-30                    | Yes                                        | No                                           | No                                    | No                                            | Unclear                                  | Unclear                               | Yes                                       | No                                 | Unclear                                 | High                     |
| McBride (Memorial Sloan<br>Kettering Cancer Center) <sup>251</sup>                                     | 2020-06-25                    | Yes                                        | No                                           | Yes                                   | Unclear                                       | Unclear                                  | Unclear                               | Yes                                       | No                                 | Unclear                                 | High                     |
| Mahajan (Yale School of<br>Medicine) <sup>98</sup>                                                     | 2020-06-23                    | Yes                                        | Yes                                          | No                                    | Yes                                           | Yes                                      | Yes                                   | Yes                                       | No                                 | Yes                                     | Moderate                 |
| Muscola (Northwell<br>Health) <sup>252</sup>                                                           | 2020-06-23                    | Yes                                        | No                                           | Yes                                   | Yes                                           | Yes                                      | Unclear                               | No                                        | No                                 | Yes                                     | Moderate                 |
| Spectrum News (University<br>of Louisville) <sup>99</sup>                                              | 2020-06-19                    | Yes                                        | No                                           | Yes                                   | No                                            | Yes                                      | Unclear                               | Unclear                                   | No                                 | No                                      | High                     |
| Reifer (Sherman Abrams<br>Laboratory) <sup>253</sup>                                                   | 2020-06-15                    | No                                         | No                                           | Yes                                   | Yes                                           | Unclear                                  | Unclear                               | Yes                                       | No                                 | Unclear                                 | Unclear                  |
| Brant-Zawadzki (Hoag<br>Memorial Hospital<br>Presbyterian)<br><small>254</small>                       | 2020-06-15                    | No                                         | Yes                                          | Yes                                   | Yes                                           | Yes                                      | Yes                                   | Yes                                       | No                                 | No                                      | High                     |

| Article Author<br>(Study Organization)                                                      | Sampling End<br>Date<br>(YMD) | Item 1:<br>Appropriate<br>sample<br>frame* | Item 2:<br>Probability<br>sampling<br>method | Item 3:<br>Adequate<br>sample<br>size | Item 4:<br>Subjects &<br>setting<br>described | Item 5:<br>Good<br>coverage of<br>sample | Item 6: Sens<br>> 90% &<br>spec > 95% | Item 7: Same<br>tests for all<br>subjects | Item 8:<br>Appropriate<br>analysis | Item 9:<br>Adequate<br>response<br>rate | Overall Risk of<br>Bias <sup>†</sup> |
|---------------------------------------------------------------------------------------------|-------------------------------|--------------------------------------------|----------------------------------------------|---------------------------------------|-----------------------------------------------|------------------------------------------|---------------------------------------|-------------------------------------------|------------------------------------|-----------------------------------------|--------------------------------------|
| Sutton (Oregon Health<br>Authority) <sup>100</sup>                                          | 2020-06-15                    | No                                         | Yes                                          | Yes                                   | No                                            | Unclear                                  | Yes                                   | Yes                                       | No                                 | Unclear                                 | High                                 |
| Dora (Veterans Affairs<br>Healthcare System)<br><sup>255</sup>                              | 2020-06-12                    | Yes                                        | No                                           | No                                    | No                                            | Unclear                                  | Yes                                   | Yes                                       | No                                 | Unclear                                 | High                                 |
| Harden (Routt County Board<br>of Health)<br><sup>102</sup>                                  | 2020-06-10                    | No                                         | No                                           | Yes                                   | No                                            | Unclear                                  | Unclear                               | Unclear                                   | No                                 | Unclear                                 | High                                 |
| Hynes (Washoe County<br>Health District)<br><sup>101</sup>                                  | 2020-06-10                    | Yes                                        | Yes                                          | No                                    | No                                            | Unclear                                  | Unclear                               | Yes                                       | No                                 | No                                      | High                                 |
| Rudavsky (Indiana<br>University Fairbanks School<br>of Public Health) <sup>103</sup>        | 2020-06-08                    | Yes                                        | Yes                                          | Yes                                   | No                                            | Yes                                      | Unclear                               | Unclear                                   | No                                 | Unclear                                 | Unclear                              |
| Flannery (University of<br>Pennsylvania) <sup>256</sup>                                     | 2020-06-03                    | Yes                                        | Yes                                          | Yes                                   | Yes                                           | Yes                                      | Unclear                               | Yes                                       | No                                 | Yes                                     | Moderate                             |
| Gray (Truckee Meadows<br>Fire Protection District) <sup>257</sup>                           | 2020-05-31                    | Yes                                        | Unclear                                      | No                                    | No                                            | Unclear                                  | Unclear                               | Yes                                       | No                                 | Unclear                                 | High                                 |
| Ohnesorge (Psalms/Solid<br>Rock Medicine Group) <sup>104</sup>                              | 2020-05-29                    | Yes                                        | No                                           | No                                    | No                                            | Unclear                                  | Unclear                               | Unclear                                   | No                                 | Unclear                                 | Unclear                              |
| Hayden (Desert Healthcare<br>District) <sup>105</sup>                                       | 2020-05-28                    | Yes                                        | No                                           | Yes                                   | No                                            | Unclear                                  | Unclear                               | Yes                                       | No                                 | Unclear                                 | Unclear                              |
| Mukherjee (Humboldt<br>County Department of<br>Health and Human Services)<br><sup>106</sup> | 2020-05-26                    | Yes                                        | No                                           | Yes                                   | No                                            | Unclear                                  | Unclear                               | Unclear                                   | No                                 | Unclear                                 | High                                 |
| Stavert (Cambridge Health<br>Alliance)<br><sup>258</sup>                                    | 2020-05-24                    | No                                         | No                                           | No                                    | Yes                                           | Unclear                                  | Unclear                               | Yes                                       | No                                 | Unclear                                 | High                                 |
| Staletovich (Coral Springs<br>City Government) <sup>259</sup>                               | 2020-05-23                    | Yes                                        | Unclear                                      | Yes                                   | No                                            | Unclear                                  | Unclear                               | Unclear                                   | No                                 | Unclear                                 | Unclear                              |

| Article Author<br>(Study Organization)                            | Sampling End<br>Date<br>(YMD) | Item 1:<br>Appropriate<br>sample<br>frame* | Item 2:<br>Probability<br>sampling<br>method | Item 3:<br>Adequate<br>sample<br>size | Item 4:<br>Subjects &<br>setting<br>described | Item 5:<br>Good<br>coverage of<br>sample | Item 6: Sens<br>> 90% &<br>spec > 95% | Item 7: Same<br>tests for all<br>subjects | Item 8:<br>Appropriate<br>analysis | Item 9:<br>Adequate<br>response<br>rate | Overall Risk of<br>Bias† |
|-------------------------------------------------------------------|-------------------------------|--------------------------------------------|----------------------------------------------|---------------------------------------|-----------------------------------------------|------------------------------------------|---------------------------------------|-------------------------------------------|------------------------------------|-----------------------------------------|--------------------------|
| Jackson (Michigan<br>Department of Corrections)<br><sup>260</sup> | 2020-05-22                    | Yes                                        | Yes                                          | Yes                                   | No                                            | Unclear                                  | Unclear                               | Unclear                                   | Unclear                            | Unclear                                 | Unclear                  |
| Jackson (Michigan<br>Department of Corrections)<br><sup>260</sup> | 2020-05-22                    | Yes                                        | Yes                                          | Yes                                   | No                                            | Unclear                                  | Unclear                               | Unclear                                   | Unclear                            | Unclear                                 | Unclear                  |
| Jackson (Michigan<br>Department of Corrections)<br><sup>260</sup> | 2020-05-22                    | Yes                                        | Yes                                          | No                                    | No                                            | Unclear                                  | Unclear                               | Unclear                                   | Unclear                            | Unclear                                 | Unclear                  |
| Jackson (Michigan<br>Department of Corrections)<br><sup>260</sup> | 2020-05-22                    | Yes                                        | Yes                                          | Yes                                   | No                                            | Unclear                                  | Unclear                               | Unclear                                   | Unclear                            | Unclear                                 | Unclear                  |
| Leidner (Chiles Research<br>Institute)<br><sup>261</sup>          | 2020-05-22                    | Yes                                        | No                                           | Yes                                   | Yes                                           | Yes                                      | No                                    | Yes                                       | No                                 | Unclear                                 | High                     |
| Alfini (UW Health) <sup>107</sup>                                 | 2020-05-20                    | Yes                                        | No                                           | Yes                                   | No                                            | Unclear                                  | Unclear                               | Unclear                                   | No                                 | Unclear                                 | Unclear                  |
| Alfini (UW Health) <sup>107</sup>                                 | 2020-05-20                    | Yes                                        | No                                           | No                                    | No                                            | Unclear                                  | Unclear                               | Unclear                                   | No                                 | Unclear                                 | Unclear                  |
| Geraci (MUSC Health-<br>Lancaster) <sup>262</sup>                 | 2020-05-20                    | No                                         | Unclear                                      | No                                    | No                                            | Unclear                                  | Unclear                               | Yes                                       | No                                 | Unclear                                 | High                     |
| Mughal (Monmouth Medical<br>Centre)<br><sup>263</sup>             | 2020-05-19                    | No                                         | No                                           | No                                    | Yes                                           | Unclear                                  | Yes                                   | Yes                                       | No                                 | Yes                                     | High                     |
| McLaughlin (University of<br>Washington) <sup>108</sup>           | 2020-05-19                    | Yes                                        | No                                           | Yes                                   | Yes                                           | Yes                                      | Yes                                   | Yes                                       | Yes                                | Yes                                     | Moderate                 |
| Boston (Boston Public<br>Health Commission) <sup>110,111</sup>    | 2020-05-15                    | Yes                                        | Yes                                          | Yes                                   | Yes                                           | Yes                                      | Unclear                               | Yes                                       | Unclear                            | No                                      | Moderate                 |
| Dietrich (Tulane University)<br><sup>264</sup>                    | 2020-05-15                    | No                                         | No                                           | Yes                                   | Yes                                           | Yes                                      | Unclear                               | Yes                                       | No                                 | Unclear                                 | High                     |
| Feehan (Oschner Clinic<br>Foundation) <sup>109</sup>              | 2020-05-15                    | Yes                                        | Yes                                          | Yes                                   | Yes                                           | Unclear                                  | Unclear                               | Yes                                       | No                                 | Unclear                                 | Moderate                 |

| Article Author<br>(Study Organization)                                                | Sampling End<br>Date<br>(YMD) | Item 1:<br>Appropriate<br>sample<br>frame* | Item 2:<br>Probability<br>sampling<br>method | Item 3:<br>Adequate<br>sample<br>size | Item 4:<br>Subjects &<br>setting<br>described | Item 5:<br>Good<br>coverage of<br>sample | Item 6: Sens<br>> 90% &<br>spec > 95% | Item 7: Same<br>tests for all<br>subjects | Item 8:<br>Appropriate<br>analysis | Item 9:<br>Adequate<br>response<br>rate | Overall Risk of<br>Bias <sup>†</sup> |
|---------------------------------------------------------------------------------------|-------------------------------|--------------------------------------------|----------------------------------------------|---------------------------------------|-----------------------------------------------|------------------------------------------|---------------------------------------|-------------------------------------------|------------------------------------|-----------------------------------------|--------------------------------------|
| Sood (Stanford University<br>School of Medicine) <sup>112</sup>                       | 2020-05-14                    | Yes                                        | Yes                                          | Yes                                   | Yes                                           | Yes                                      | No                                    | Yes                                       | Yes                                | No                                      | Moderate                             |
| Parker-Magyar (Summit<br>Medical Center) <sup>265</sup>                               | 2020-05-14                    | Yes                                        | No                                           | No                                    | No                                            | Unclear                                  | Unclear                               | Unclear                                   | No                                 | Unclear                                 | High                                 |
| Angeles (University of<br>Southern California) <sup>114</sup>                         | 2020-05-12                    | Yes                                        | Unclear                                      | Yes                                   | No                                            | Unclear                                  | Unclear                               | Unclear                                   | No                                 | Unclear                                 | Unclear                              |
| Havers (US Centers for<br>Disease Control and<br>Prevention) <sup>113</sup>           | 2020-05-12                    | No                                         | No                                           | Yes                                   | Yes                                           | Unclear                                  | Yes                                   | Yes                                       | Yes                                | Unclear                                 | Moderate                             |
| Nesbitt (New York Blood<br>Center) <sup>115</sup>                                     | 2020-05-11                    | No                                         | No                                           | Yes                                   | Yes                                           | Unclear                                  | Yes                                   | Yes                                       | No                                 | Unclear                                 | Moderate                             |
| Hunter (Indiana<br>University) <sup>266</sup>                                         | 2020-05-08                    | Yes                                        | No                                           | Yes                                   | Yes                                           | No                                       | Yes                                   | Yes                                       | No                                 | Unclear                                 | High                                 |
| Ripperger (University of<br>Arizona) <sup>267</sup>                                   | 2020-05-07                    | Yes                                        | No                                           | Yes                                   | Yes                                           | Unclear                                  | Unclear                               | Yes                                       | No                                 | Unclear                                 | High                                 |
| Sydney (Jacobi Medical<br>Center) <sup>268</sup>                                      | 2020-05-04                    | Yes                                        | No                                           | Yes                                   | Yes                                           | Unclear                                  | Unclear                               | Unclear                                   | No                                 | No                                      | High                                 |
| Shafa (Indiana University<br>Fairbanks School of Public<br>Health) <sup>117-119</sup> | 2020-05-03                    | Yes                                        | No                                           | No                                    | Yes                                           | Yes                                      | Yes                                   | Yes                                       | No                                 | Unclear                                 | High                                 |
| Havers (US Centers for<br>Disease Control and<br>Prevention) <sup>113</sup>           | 2020-05-03                    | No                                         | No                                           | Yes                                   | Yes                                           | Unclear                                  | Yes                                   | Yes                                       | Yes                                | Unclear                                 | Moderate                             |
| Havers (US Centers for<br>Disease Control and<br>Prevention) <sup>113</sup>           | 2020-05-03                    | No                                         | No                                           | Yes                                   | Yes                                           | Unclear                                  | Yes                                   | Yes                                       | Yes                                | Unclear                                 | Moderate                             |
| Biggs (CDC COVID-19<br>Response Team) <sup>116</sup>                                  | 2020-05-03                    | Yes                                        | Yes                                          | Yes                                   | Yes                                           | Yes                                      | Yes                                   | Yes                                       | No                                 | Unclear                                 | Low                                  |
| Reagan (Medical University<br>South Carolina) <sup>269</sup>                          | 2020-05-02                    | No                                         | Unclear                                      | Yes                                   | No                                            | Unclear                                  | Yes                                   | Yes                                       | No                                 | Unclear                                 | High                                 |

| Article Author<br>(Study Organization)                                                | Sampling End<br>Date<br>(YMD) | Item 1:<br>Appropriate<br>sample<br>frame* | Item 2:<br>Probability<br>sampling<br>method | Item 3:<br>Adequate<br>sample<br>size | Item 4:<br>Subjects &<br>setting<br>described | Item 5:<br>Good<br>coverage of<br>sample | Item 6: Sens<br>> 90% &<br>spec > 95% | Item 7: Same<br>tests for all<br>subjects | Item 8:<br>Appropriate<br>analysis | Item 9:<br>Adequate<br>response<br>rate | Overall Risk of<br>Bias <sup>†</sup> |
|---------------------------------------------------------------------------------------|-------------------------------|--------------------------------------------|----------------------------------------------|---------------------------------------|-----------------------------------------------|------------------------------------------|---------------------------------------|-------------------------------------------|------------------------------------|-----------------------------------------|--------------------------------------|
| Cohen (DaVita Clinical<br>Research) <sup>271</sup>                                    | 2020-04-30                    | Yes                                        | No                                           | Yes                                   | Yes                                           | Unclear                                  | No                                    | Yes                                       | No                                 | Unclear                                 | High                                 |
| Jeremias (St Francis<br>Hospital)<br><sup>270</sup>                                   | 2020-04-30                    | No                                         | No                                           | Yes                                   | Yes                                           | Yes                                      | Unclear                               | No                                        | No                                 | No                                      | High                                 |
| Shafa (Indiana University<br>Fairbanks School of Public<br>Health) <sup>117-119</sup> | 2020-04-29                    | Yes                                        | Yes                                          | Yes                                   | Yes                                           | No                                       | Yes                                   | Yes                                       | No                                 | No                                      | Moderate                             |
| Rosenberg (New York State<br>Department of Health) <sup>121</sup>                     | 2020-04-28                    | Yes                                        | No                                           | Yes                                   | Yes                                           | Yes                                      | Yes                                   | Yes                                       | Yes                                | Yes                                     | Moderate                             |
| Chamie (University of<br>California, San Francisco) <sup>120</sup>                    | 2020-04-28                    | Yes                                        | No                                           | Yes                                   | Yes                                           | Yes                                      | Yes                                   | Yes                                       | No                                 | Yes                                     | High                                 |
| Zou (Georgia State<br>University) <sup>122</sup>                                      | 2020-04-27                    | No                                         | No                                           | No                                    | No                                            | Unclear                                  | Unclear                               | Yes                                       | No                                 | Unclear                                 | High                                 |
| Havers (US Centers for<br>Disease Control and<br>Prevention) <sup>113</sup>           | 2020-04-27                    | No                                         | No                                           | Yes                                   | Yes                                           | Unclear                                  | Yes                                   | Yes                                       | Yes                                | Unclear                                 | Moderate                             |
| Bryan (University of<br>Washington School of<br>Medicine) <sup>123</sup>              | 2020-04-26                    | Yes                                        | No                                           | Yes                                   | Yes                                           | Unclear                                  | Yes                                   | Yes                                       | No                                 | Unclear                                 | High                                 |
| Havers (US Centers for<br>Disease Control and<br>Prevention) <sup>113</sup>           | 2020-04-26                    | No                                         | No                                           | Yes                                   | Yes                                           | Unclear                                  | Yes                                   | Yes                                       | Yes                                | Unclear                                 | Moderate                             |
| Havers (US Centers for<br>Disease Control and<br>Prevention) <sup>113</sup>           | 2020-04-25                    | No                                         | No                                           | Yes                                   | Yes                                           | Unclear                                  | Yes                                   | Yes                                       | Yes                                | Unclear                                 | Moderate                             |
| Waymer (OMNI Healthcare)<br><sup>124,125</sup>                                        | 2020-04-24                    | Yes                                        | No                                           | Yes                                   | No                                            | Unclear                                  | Yes                                   | Yes                                       | No                                 | Unclear                                 | High                                 |
| Payne (US Navy)<br><sup>272</sup>                                                     | 2020-04-24                    | No                                         | No                                           | No                                    | No                                            | Unclear                                  | Unclear                               | Yes                                       | No                                 | No                                      | High                                 |
| Dingens (Fred Hutchinson<br>Cancer Research Center) <sup>126</sup>                    | 2020-04-24                    | No                                         | No                                           | Yes                                   | No                                            | Unclear                                  | Yes                                   | Yes                                       | No                                 | Unclear                                 | High                                 |

| Article Author<br>(Study Organization)                                     | Sampling End<br>Date<br>(YMD) | Item 1:<br>Appropriate<br>sample<br>frame* | Item 2:<br>Probability<br>sampling<br>method | Item 3:<br>Adequate<br>sample<br>size | Item 4:<br>Subjects &<br>setting<br>described | Item 5:<br>Good<br>coverage of<br>sample | Item 6: Sens<br>> 90% &<br>spec > 95% | Item 7: Same<br>tests for all<br>subjects | Item 8:<br>Appropriate<br>analysis | Item 9:<br>Adequate<br>response<br>rate | Overall Risk of<br>Bias† |
|----------------------------------------------------------------------------|-------------------------------|--------------------------------------------|----------------------------------------------|---------------------------------------|-----------------------------------------------|------------------------------------------|---------------------------------------|-------------------------------------------|------------------------------------|-----------------------------------------|--------------------------|
| Appa (University of<br>California, San Francisco) <sup>127</sup>           | 2020-04-24                    | Yes                                        | No                                           | Yes                                   | Yes                                           | Yes                                      | Yes                                   | Yes                                       | No                                 | Unclear                                 | High                     |
| Kiefer (Ohio State<br>University College of<br>Medicine) <sup>273</sup>    | 2020-04-23                    | No                                         | No                                           | No                                    | Yes                                           | No                                       | Unclear                               | Yes                                       | No                                 | No                                      | High                     |
| Paterson (Baton Rouge<br>General Hospital) <sup>128</sup>                  | 2020-04-21                    | No                                         | Unclear                                      | No                                    | No                                            | Unclear                                  | Unclear                               | Yes                                       | Unclear                            | Unclear                                 | Unclear                  |
| Morcuende (Columbia<br>University Irving Medical<br>Center) <sup>276</sup> | 2020-04-21                    | No                                         | No                                           | No                                    | Yes                                           | No                                       | Yes                                   | Yes                                       | No                                 | No                                      | High                     |
| Slusser (Stanford University)<br><sup>274,275</sup>                        | 2020-04-21                    | Yes                                        | Unclear                                      | Yes                                   | No                                            | Unclear                                  | Unclear                               | Unclear                                   | No                                 | Unclear                                 | Unclear                  |
| Stock (Albert Einstein<br>College of Medicine) <sup>277</sup>              | 2020-04-20                    | No                                         | No                                           | No                                    | Yes                                           | No                                       | Unclear                               | Yes                                       | No                                 | Unclear                                 | High                     |
| Madsen (University of Utah)<br><sup>278</sup>                              | 2020-04-19                    | No                                         | No                                           | No                                    | No                                            | Unclear                                  | Yes                                   | Yes                                       | No                                 | Yes                                     | High                     |
| Stadlbauer (Icahn School of<br>Medicine at Mount Sinai) <sup>129</sup>     | 2020-04-19                    | No                                         | No                                           | Yes                                   | Yes                                           | Yes                                      | Yes                                   | Yes                                       | No                                 | Unclear                                 | High                     |
| Caban-Martinez (University<br>of Miami) <sup>279</sup>                     | 2020-04-17                    | No                                         | No                                           | No                                    | Yes                                           | Yes                                      | No                                    | Yes                                       | No                                 | Unclear                                 | High                     |
| Hains (Icahn School of<br>Medicine at Mount Sinai) <sup>280</sup>          | 2020-04-15                    | No                                         | No                                           | No                                    | No                                            | No                                       | Unclear                               | Yes                                       | No                                 | No                                      | High                     |
| Hains (Icahn School of<br>Medicine at Mount Sinai) <sup>280</sup>          | 2020-04-15                    | No                                         | No                                           | No                                    | No                                            | No                                       | Unclear                               | Yes                                       | No                                 | No                                      | High                     |
| Stubblefield (Vanderbilt<br>University Medical Center)<br><sup>281</sup>   | 2020-04-13                    | No                                         | No                                           | No                                    | Yes                                           | Yes                                      | Yes                                   | Yes                                       | No                                 | Unclear                                 | High                     |

| Article Author<br>(Study Organization)                                      | Sampling End<br>Date<br>(YMD) | Item 1:<br>Appropriate<br>sample<br>frame* | Item 2:<br>Probability<br>sampling<br>method | Item 3:<br>Adequate<br>sample<br>size | Item 4:<br>Subjects &<br>setting<br>described | Item 5:<br>Good<br>coverage of<br>sample | Item 6: Sens<br>> 90% &<br>spec > 95% | Item 7: Same<br>tests for all<br>subjects | Item 8:<br>Appropriate<br>analysis | Item 9:<br>Adequate<br>response<br>rate | Overall Risk of<br>Bias† |
|-----------------------------------------------------------------------------|-------------------------------|--------------------------------------------|----------------------------------------------|---------------------------------------|-----------------------------------------------|------------------------------------------|---------------------------------------|-------------------------------------------|------------------------------------|-----------------------------------------|--------------------------|
| Havers (US Centers for<br>Disease Control and<br>Prevention) <sup>113</sup> | 2020-04-10                    | No                                         | No                                           | Yes                                   | Yes                                           | Unclear                                  | Yes                                   | Yes                                       | Yes                                | Unclear                                 | Moderate                 |
| Havers (US Centers for<br>Disease Control and<br>Prevention) <sup>113</sup> | 2020-04-08                    | No                                         | No                                           | Yes                                   | Yes                                           | Unclear                                  | Yes                                   | Yes                                       | Yes                                | Unclear                                 | Moderate                 |
| Goldberg (Harvard Medical<br>School) <sup>282</sup>                         | 2020-04-06                    | Yes                                        | No                                           | No                                    | Yes                                           | Yes                                      | Yes                                   | Yes                                       | No                                 | Yes                                     | High                     |
| Bendavid (University of<br>Stanford) <sup>130</sup>                         | 2020-04-04                    | No                                         | Yes                                          | Yes                                   | Yes                                           | No                                       | No                                    | Yes                                       | Yes                                | Unclear                                 | High                     |
| Mansour (Icahn School of<br>Medicine at Mount Sinai) <sup>283</sup>         | 2020-04-04                    | Yes                                        | No                                           | No                                    | Yes                                           | Yes                                      | Unclear                               | Yes                                       | No                                 | Unclear                                 | High                     |
| Havers (US Centers for<br>Disease Control and<br>Prevention) <sup>113</sup> | 2020-04-01                    | No                                         | No                                           | Yes                                   | Yes                                           | Unclear                                  | Yes                                   | Yes                                       | Yes                                | Unclear                                 | Moderate                 |
| Havers (US Centers for<br>Disease Control and<br>Prevention) <sup>113</sup> | 2020-04-01                    | No                                         | No                                           | Yes                                   | Yes                                           | Unclear                                  | Yes                                   | Yes                                       | Yes                                | Unclear                                 | Moderate                 |
| Schuchat (University of<br>Washington) <sup>131</sup>                       | 2020-03-31                    | No                                         | No                                           | No                                    | No                                            | Unclear                                  | Unclear                               | Unclear                                   | No                                 | Unclear                                 | High                     |
| Chu (US Centers for Disease<br>Control and Prevention) <sup>284</sup>       | 2020-02-03                    | Yes                                        | No                                           | No                                    | No                                            | Unclear                                  | Yes                                   | Yes                                       | No                                 | Yes                                     | High                     |
| <b>Latin America and Caribbean</b>                                          |                               |                                            |                                              |                                       |                                               |                                          |                                       |                                           |                                    |                                         |                          |
| <b>Brazil</b>                                                               |                               |                                            |                                              |                                       |                                               |                                          |                                       |                                           |                                    |                                         |                          |
| Menezes (Universidade<br>Federal de Pelotas) <sup>132</sup>                 | 2020-06-24                    | Yes                                        | Yes                                          | Yes                                   | Yes                                           | Yes                                      | No                                    | Yes                                       | No                                 | Yes                                     | Moderate                 |
| Pelotas (Universidade<br>Federal de Pelotas) <sup>133</sup>                 | 2020-06-07                    | Yes                                        | Yes                                          | Yes                                   | No                                            | Yes                                      | No                                    | Yes                                       | No                                 | Unclear                                 | Moderate                 |

| Article Author<br>(Study Organization)                                       | Sampling End<br>Date<br>(YMD) | Item 1:<br>Appropriate<br>sample<br>frame* | Item 2:<br>Probability<br>sampling<br>method | Item 3:<br>Adequate<br>sample<br>size | Item 4:<br>Subjects &<br>setting<br>described | Item 5:<br>Good<br>coverage of<br>sample | Item 6: Sens<br>> 90% &<br>spec > 95% | Item 7: Same<br>tests for all<br>subjects | Item 8:<br>Appropriate<br>analysis | Item 9:<br>Adequate<br>response<br>rate | Overall Risk of<br>Bias <sup>†</sup> |
|------------------------------------------------------------------------------|-------------------------------|--------------------------------------------|----------------------------------------------|---------------------------------------|-----------------------------------------------|------------------------------------------|---------------------------------------|-------------------------------------------|------------------------------------|-----------------------------------------|--------------------------------------|
| Vieira (Centro de Operações de Emergências em Saúde Pública)                 | 2020-05-31                    | Yes                                        | Yes                                          | Yes                                   | No                                            | Unclear                                  | No                                    | Yes                                       | No                                 | Unclear                                 | Moderate                             |
| Adriano (Centro de Operações de Emergências em Saúde Pública) <sup>134</sup> | 2020-05-24                    | Yes                                        | Yes                                          | Yes                                   | No                                            | Unclear                                  | No                                    | Yes                                       | No                                 | Unclear                                 | Moderate                             |
| Hallal (Universidade Federal de Pelotas) <sup>135</sup>                      | 2020-05-21                    | Yes                                        | Yes                                          | Yes                                   | Yes                                           | Yes                                      | No                                    | Yes                                       | Yes                                | No                                      | Low                                  |
| Adriano (Centro de Operações de Emergências em Saúde Pública) <sup>134</sup> | 2020-05-17                    | Yes                                        | Yes                                          | Yes                                   | No                                            | Unclear                                  | No                                    | Yes                                       | No                                 | Unclear                                 | Moderate                             |
| Gomes (Secretaria de Estado da Saúde do Espírito Santo) <sup>136</sup>       | 2020-05-15                    | Yes                                        | Yes                                          | Yes                                   | Yes                                           | Yes                                      | No                                    | Yes                                       | No                                 | Unclear                                 | Moderate                             |
| Gomes (Secretaria de Estado da Saúde do Espírito Santo) <sup>136</sup>       | 2020-05-15                    | Yes                                        | Yes                                          | Yes                                   | Yes                                           | Yes                                      | No                                    | Yes                                       | No                                 | Unclear                                 | Moderate                             |
| Watanabe (Grupo Fleury) <sup>138</sup>                                       | 2020-05-12                    | Yes                                        | Yes                                          | No                                    | No                                            | Unclear                                  | Unclear                               | Unclear                                   | No                                 | Unclear                                 | Unclear                              |
| Tess (Universidade de São Paulo) <sup>137</sup>                              | 2020-05-12                    | Yes                                        | Yes                                          | No                                    | Yes                                           | Yes                                      | Yes                                   | Yes                                       | No                                 | No                                      | Moderate                             |
| Silveira (Universidade Federal de Pelotas) <sup>139</sup>                    | 2020-05-11                    | Yes                                        | Yes                                          | Yes                                   | Yes                                           | Yes                                      | No                                    | Yes                                       | Yes                                | Yes                                     | Low                                  |
| Adriano (Centro de Operações de Emergências em Saúde Pública) <sup>134</sup> | 2020-05-10                    | Yes                                        | Yes                                          | Yes                                   | No                                            | Unclear                                  | No                                    | Yes                                       | No                                 | Unclear                                 | Moderate                             |
| Adriano (Centro de Operações de Emergências em Saúde Pública) <sup>134</sup> | 2020-05-03                    | Yes                                        | Yes                                          | Yes                                   | No                                            | Unclear                                  | No                                    | Yes                                       | No                                 | Unclear                                 | Moderate                             |
| Filho (Universidade do Estado do Rio de Janeiro) <sup>140</sup>              | 2020-04-27                    | No                                         | No                                           | Yes                                   | Yes                                           | Unclear                                  | No                                    | Yes                                       | Yes                                | Yes                                     | Moderate                             |
| Silveira (Universidade Federal de Pelotas) <sup>139</sup>                    | 2020-04-27                    | Yes                                        | Yes                                          | Yes                                   | Yes                                           | Yes                                      | No                                    | Yes                                       | Yes                                | Yes                                     | Low                                  |



| Article Author<br>(Study Organization)                                                                        | Sampling End<br>Date<br>(YMD) | Item 1:<br>Appropriate<br>sample<br>frame* | Item 2:<br>Probability<br>sampling<br>method | Item 3:<br>Adequate<br>sample<br>size | Item 4:<br>Subjects &<br>setting<br>described | Item 5:<br>Good<br>coverage of<br>sample | Item 6: Sens<br>> 90% &<br>spec > 95% | Item 7: Same<br>tests for all<br>subjects | Item 8:<br>Appropriate<br>analysis | Item 9:<br>Adequate<br>response<br>rate | Overall Risk of<br>Bias <sup>†</sup> |
|---------------------------------------------------------------------------------------------------------------|-------------------------------|--------------------------------------------|----------------------------------------------|---------------------------------------|-----------------------------------------------|------------------------------------------|---------------------------------------|-------------------------------------------|------------------------------------|-----------------------------------------|--------------------------------------|
| Adriano (Centro de Operações de Emergências em Saúde Pública) <sup>134</sup>                                  | 2020-04-26                    | Yes                                        | Yes                                          | Yes                                   | No                                            | Unclear                                  | No                                    | Yes                                       | No                                 | Unclear                                 | Moderate                             |
| Adriano (Centro de Operações de Emergências em Saúde Pública) <sup>134</sup>                                  | 2020-04-19                    | Yes                                        | Yes                                          | Yes                                   | No                                            | Unclear                                  | No                                    | Yes                                       | No                                 | Unclear                                 | Moderate                             |
| Silveira (Universidade Federal de Pelotas) <sup>139</sup>                                                     | 2020-04-13                    | Yes                                        | Yes                                          | Yes                                   | Yes                                           | Yes                                      | No                                    | Yes                                       | Yes                                | Yes                                     | Low                                  |
| <b>Ecuador</b>                                                                                                |                               |                                            |                                              |                                       |                                               |                                          |                                       |                                           |                                    |                                         |                                      |
| Brutto (The Atahualpa Project) <sup>142</sup>                                                                 | 2020-05-31                    | Yes                                        | No                                           | No                                    | Yes                                           | Unclear                                  | Yes                                   | Yes                                       | No                                 | Unclear                                 | High                                 |
| Brutto (Universidad Peruana Cayetano Heredia) <sup>141</sup>                                                  | 2020-05-31                    | Yes                                        | No                                           | Yes                                   | Yes                                           | Yes                                      | Yes                                   | Yes                                       | No                                 | Yes                                     | High                                 |
| <b>Peru</b>                                                                                                   |                               |                                            |                                              |                                       |                                               |                                          |                                       |                                           |                                    |                                         |                                      |
| Peruvian Government (National Center for Epidemiology, Prevention and Control of Diseases) <sup>143-145</sup> | 2020-07-09                    | Yes                                        | Yes                                          | Yes                                   | No                                            | Unclear                                  | No                                    | Yes                                       | No                                 | Unclear                                 | High                                 |
| <b>North Africa and Middle East</b>                                                                           |                               |                                            |                                              |                                       |                                               |                                          |                                       |                                           |                                    |                                         |                                      |
| <b>Egypt</b>                                                                                                  |                               |                                            |                                              |                                       |                                               |                                          |                                       |                                           |                                    |                                         |                                      |
| Kassem (Cairo University) <sup>285</sup>                                                                      | 2020-06-14                    | No                                         | No                                           | No                                    | Yes                                           | Unclear                                  | Yes                                   | Yes                                       | No                                 | No                                      | High                                 |
| <b>Iran</b>                                                                                                   |                               |                                            |                                              |                                       |                                               |                                          |                                       |                                           |                                    |                                         |                                      |
| Shakiba (Guilan University) <sup>146</sup>                                                                    | 2020-04-30                    | Yes                                        | Yes                                          | No                                    | Yes                                           | Unclear                                  | No                                    | Yes                                       | Yes                                | No                                      | Moderate                             |
| <b>Jordan</b>                                                                                                 |                               |                                            |                                              |                                       |                                               |                                          |                                       |                                           |                                    |                                         |                                      |
| Sughayer (King Hussein Cancer Centre) <sup>147</sup>                                                          | 2020-06-15                    | No                                         | Yes                                          | Yes                                   | Yes                                           | Unclear                                  | Yes                                   | Yes                                       | No                                 | Unclear                                 | High                                 |

| Article Author<br>(Study Organization)                          | Sampling End<br>Date<br>(YMD) | Item 1:<br>Appropriate<br>sample<br>frame* | Item 2:<br>Probability<br>sampling<br>method | Item 3:<br>Adequate<br>sample<br>size | Item 4:<br>Subjects &<br>setting<br>described | Item 5:<br>Good<br>coverage of<br>sample | Item 6: Sens<br>> 90% &<br>spec > 95% | Item 7: Same<br>tests for all<br>subjects | Item 8:<br>Appropriate<br>analysis | Item 9:<br>Adequate<br>response<br>rate | Overall Risk of<br>Bias† |
|-----------------------------------------------------------------|-------------------------------|--------------------------------------------|----------------------------------------------|---------------------------------------|-----------------------------------------------|------------------------------------------|---------------------------------------|-------------------------------------------|------------------------------------|-----------------------------------------|--------------------------|
| <b>Libya</b>                                                    |                               |                                            |                                              |                                       |                                               |                                          |                                       |                                           |                                    |                                         |                          |
| Kammon (Al-Zintan University) <sup>286</sup>                    | 2020-05-18                    | Yes                                        | Yes                                          | No                                    | Yes                                           | Yes                                      | No                                    | Yes                                       | No                                 | Yes                                     | High                     |
| Kammon (Al-Zintan University) <sup>286</sup>                    | 2020-05-18                    | No                                         | Unclear                                      | No                                    | Yes                                           | Yes                                      | No                                    | Yes                                       | No                                 | Yes                                     | High                     |
| <b>Turkey</b>                                                   |                               |                                            |                                              |                                       |                                               |                                          |                                       |                                           |                                    |                                         |                          |
| Alkurt (University of Health Sciences) <sup>287</sup>           | 2020-06-06                    | Yes                                        | No                                           | Yes                                   | Yes                                           | Yes                                      | Yes                                   | Yes                                       | No                                 | Unclear                                 | Moderate                 |
| <b>South Asia</b>                                               |                               |                                            |                                              |                                       |                                               |                                          |                                       |                                           |                                    |                                         |                          |
| <b>India</b>                                                    |                               |                                            |                                              |                                       |                                               |                                          |                                       |                                           |                                    |                                         |                          |
| Ray (All India Institute of Medical Sciences) <sup>288</sup>    | 2020-08-08                    | No                                         | No                                           | No                                    | Yes                                           | Yes                                      | No                                    | Yes                                       | No                                 | Unclear                                 | High                     |
| Bedi (Delhi National Centre for Disease Control) <sup>148</sup> | 2020-08-07                    | No                                         | Unclear                                      | Yes                                   | No                                            | Unclear                                  | Unclear                               | Unclear                                   | No                                 | Unclear                                 | Unclear                  |
| Husain (King George's Medical University) <sup>149</sup>        | 2020-07-19                    | No                                         | Yes                                          | Yes                                   | No                                            | Unclear                                  | Unclear                               | Yes                                       | No                                 | Unclear                                 | High                     |
| Hindustan Times (Thyrocare) <sup>150,151</sup>                  | 2020-07-19                    | Yes                                        | Yes                                          | Yes                                   | No                                            | No                                       | Unclear                               | Unclear                                   | No                                 | Unclear                                 | High                     |
| Kakani ( University of Chicago) <sup>152,153</sup>              | 2020-07-19                    | Yes                                        | Yes                                          | Yes                                   | Yes                                           | Yes                                      | Yes                                   | Yes                                       | No                                 | Unclear                                 | Low                      |
| Mishra (Haryana Health Department) <sup>154</sup>               | 2020-07-15                    | No                                         | Yes                                          | Yes                                   | No                                            | Unclear                                  | Unclear                               | Yes                                       | No                                 | Unclear                                 | High                     |
| Kakani ( University of Chicago) <sup>152,153</sup>              | 2020-07-14                    | Yes                                        | Yes                                          | Yes                                   | Yes                                           | Yes                                      | Yes                                   | Yes                                       | No                                 | Unclear                                 | Low                      |
| Unclear (Ahmedabad Municipal Corporation) <sup>289</sup>        | 2020-07-11                    | Yes                                        | No                                           | Yes                                   | No                                            | Unclear                                  | Unclear                               | Unclear                                   | No                                 | Unclear                                 | Unclear                  |

| Article Author (Study Organization)                                                        | Sampling End Date (YMD) | Item 1: Appropriate sample frame* | Item 2: Probability sampling method | Item 3: Adequate sample size | Item 4: Subjects & setting described | Item 5: Good coverage of sample | Item 6: Sens > 90% & spec > 95% | Item 7: Same tests for all subjects | Item 8: Appropriate analysis | Item 9: Adequate response rate | Overall Risk of Bias <sup>†</sup> |
|--------------------------------------------------------------------------------------------|-------------------------|-----------------------------------|-------------------------------------|------------------------------|--------------------------------------|---------------------------------|---------------------------------|-------------------------------------|------------------------------|--------------------------------|-----------------------------------|
| Kumar (Thiruvananthapuram Health Department) <sup>157</sup>                                | 2020-07-10              | Yes                               | Unclear                             | Yes                          | No                                   | Unclear                         | Unclear                         | Unclear                             | No                           | Unclear                        | Unclear                           |
| Saxena (Indian Center for Disease Control) <sup>155,156</sup>                              | 2020-07-10              | Yes                               | Yes                                 | Yes                          | No                                   | Unclear                         | Yes                             | Yes                                 | No                           | Unclear                        | Moderate                          |
| Rao (Sri Jayadeva Institute of Cardiovascular Sciences and Research) <sup>290</sup>        | 2020-06-06              | Yes                               | Unclear                             | Yes                          | No                                   | Unclear                         | Unclear                         | Yes                                 | No                           | Unclear                        | Unclear                           |
| Koshy (Indian Council of Medical Research) <sup>158-161</sup>                              | 2020-05-25              | Yes                               | Yes                                 | Yes                          | No                                   | Yes                             | Unclear                         | Yes                                 | No                           | Unclear                        | Moderate                          |
| <b>Pakistan</b>                                                                            |                         |                                   |                                     |                              |                                      |                                 |                                 |                                     |                              |                                |                                   |
| Younas (National Institute of Blood Diseases & Bone Marrow Transplantation) <sup>162</sup> | 2020-07-15              | No                                | No                                  | No                           | Yes                                  | No                              | Unclear                         | No                                  | No                           | Unclear                        | High                              |
| Chughtai (Chughtai Institute of Pathology) <sup>291</sup>                                  | 2020-05-30              | Yes                               | No                                  | No                           | Yes                                  | No                              | Yes                             | Yes                                 | No                           | Unclear                        | High                              |
| <b>Southeast Asia, East Asia, and Oceania</b>                                              |                         |                                   |                                     |                              |                                      |                                 |                                 |                                     |                              |                                |                                   |
| <b>China</b>                                                                               |                         |                                   |                                     |                              |                                      |                                 |                                 |                                     |                              |                                |                                   |
| Chang (Beijing Hospital) <sup>163</sup>                                                    | 2020-04-30              | No                                | Yes                                 | Yes                          | Yes                                  | Yes                             | Unclear                         | Yes                                 | No                           | Unclear                        | High                              |
| Liang (The First Affiliated Hospital of Guangzhou Medical University) <sup>293</sup>       | 2020-04-30              | Yes                               | Unclear                             | Yes                          | Yes                                  | Unclear                         | No                              | Yes                                 | No                           | Unclear                        | High                              |
| Liang (The First Affiliated Hospital of Guangzhou Medical University) <sup>293</sup>       | 2020-04-30              | Yes                               | Unclear                             | Yes                          | Yes                                  | Unclear                         | No                              | Yes                                 | No                           | Unclear                        | High                              |
| Liu (Zhongnan Hospital of Wuhan University) <sup>164</sup>                                 | 2020-04-29              | Yes                               | No                                  | Yes                          | Yes                                  | Yes                             | Yes                             | Yes                                 | No                           | Yes                            | Moderate                          |
| Liu (Zhongnan Hospital of Wuhan University) <sup>164</sup>                                 | 2020-04-29              | Yes                               | Unclear                             | Yes                          | Yes                                  | Yes                             | Yes                             | Yes                                 | No                           | Yes                            | Moderate                          |

| Article Author<br>(Study Organization)                                         | Sampling End<br>Date<br>(YMD) | Item 1:<br>Appropriate<br>sample<br>frame* | Item 2:<br>Probability<br>sampling<br>method | Item 3:<br>Adequate<br>sample<br>size | Item 4:<br>Subjects &<br>setting<br>described | Item 5:<br>Good<br>coverage of<br>sample | Item 6: Sens<br>> 90% &<br>spec > 95% | Item 7: Same<br>tests for all<br>subjects | Item 8:<br>Appropriate<br>analysis | Item 9:<br>Adequate<br>response<br>rate | Overall Risk of<br>Bias <sup>†</sup> |
|--------------------------------------------------------------------------------|-------------------------------|--------------------------------------------|----------------------------------------------|---------------------------------------|-----------------------------------------------|------------------------------------------|---------------------------------------|-------------------------------------------|------------------------------------|-----------------------------------------|--------------------------------------|
| Liu (Zhongnan Hospital of<br>Wuhan University) <sup>164</sup>                  | 2020-04-29                    | Yes                                        | No                                           | Yes                                   | Yes                                           | Yes                                      | Yes                                   | Yes                                       | No                                 | Yes                                     | Moderate                             |
| Ling ( Chinese Center for<br>Disease Control and<br>Prevention) <sup>165</sup> | 2020-04-28                    | Yes                                        | No                                           | Yes                                   | Yes                                           | Yes                                      | No                                    | Yes                                       | Yes                                | Yes                                     | Moderate                             |
| Liu (Sun Yat-sen<br>University) <sup>294</sup>                                 | 2020-04-21                    | No                                         | No                                           | No                                    | Yes                                           | Unclear                                  | Yes                                   | Yes                                       | No                                 | Unclear                                 | High                                 |
| He (Wuhan University) <sup>292</sup>                                           | 2020-06-10                    | No                                         | No                                           | Yes                                   | Yes                                           | Unclear                                  | No                                    | Yes                                       | No                                 | Unclear                                 | High                                 |
| Wu (Wuhan University)<br><sup>295</sup>                                        | 2020-04-15                    | Yes                                        | Unclear                                      | No                                    | No                                            | Unclear                                  | Unclear                               | Yes                                       | No                                 | Unclear                                 | High                                 |
| Wu (Wuhan University)<br><sup>295</sup>                                        | 2020-04-15                    | No                                         | Unclear                                      | Yes                                   | No                                            | Unclear                                  | Unclear                               | Yes                                       | No                                 | Unclear                                 | High                                 |
| Xu (National Clinical<br>Research Centre for Kidney<br>Disease) <sup>296</sup> | 2020-04-10                    | Yes                                        | No                                           | Yes                                   | Yes                                           | Unclear                                  | Unclear                               | Yes                                       | No                                 | Unclear                                 | High                                 |
| Xu (National Clinical<br>Research Centre for Kidney<br>Disease) <sup>296</sup> | 2020-04-10                    | Yes                                        | No                                           | Yes                                   | Yes                                           | Unclear                                  | Unclear                               | Yes                                       | No                                 | Unclear                                 | High                                 |
| Xu (Institute of Blood<br>Transfusion) <sup>166</sup>                          | 2020-04-02                    | No                                         | Yes                                          | Yes                                   | Yes                                           | No                                       | Unclear                               | Yes                                       | No                                 | Unclear                                 | High                                 |
| Zhang (Huazhong University<br>of Science and Technology) <sup>297</sup>        | 2020-03-27                    | No                                         | No                                           | No                                    | Yes                                           | Yes                                      | Unclear                               | Yes                                       | No                                 | Unclear                                 | High                                 |
| Tang ( Tongji Medical<br>College) <sup>298</sup>                               | 2020-03-21                    | Yes                                        | Yes                                          | Yes                                   | Yes                                           | Yes                                      | No                                    | Yes                                       | No                                 | Yes                                     | Moderate                             |
| Tu (Wuhan Institute of<br>Virology) <sup>299</sup>                             | 2020-03-20                    | Yes                                        | No                                           | No                                    | No                                            | Unclear                                  | Unclear                               | Yes                                       | No                                 | Unclear                                 | High                                 |
| Zhang (Shenzhen Second<br>People's Hospital) <sup>300</sup>                    | 2020-03-18                    | Yes                                        | No                                           | Yes                                   | No                                            | Unclear                                  | Unclear                               | Yes                                       | No                                 | Unclear                                 | High                                 |

| Article Author<br>(Study Organization)                                             | Sampling End<br>Date<br>(YMD) | Item 1:<br>Appropriate<br>sample<br>frame* | Item 2:<br>Probability<br>sampling<br>method | Item 3:<br>Adequate<br>sample<br>size | Item 4:<br>Subjects &<br>setting<br>described | Item 5:<br>Good<br>coverage of<br>sample | Item 6: Sens<br>> 90% &<br>spec > 95% | Item 7: Same<br>tests for all<br>subjects | Item 8:<br>Appropriate<br>analysis | Item 9:<br>Adequate<br>response<br>rate | Overall Risk of<br>Bias† |
|------------------------------------------------------------------------------------|-------------------------------|--------------------------------------------|----------------------------------------------|---------------------------------------|-----------------------------------------------|------------------------------------------|---------------------------------------|-------------------------------------------|------------------------------------|-----------------------------------------|--------------------------|
| Xiong (Huazhong University<br>of Science and Technology)<br><sup>301</sup>         | 2020-03-17                    | Unclear                                    | Unclear                                      | Yes                                   | Yes                                           | Unclear                                  | Unclear                               | Yes                                       | No                                 | Unclear                                 | Unclear                  |
| To (Queen Mary Hospital)<br><sup>167</sup>                                         | 2020-03-17                    | Yes                                        | Yes                                          | Yes                                   | No                                            | Yes                                      | No                                    | Yes                                       | No                                 | Unclear                                 | Moderate                 |
| Chang (Beijing Hospital) <sup>163</sup>                                            | 2020-03-15                    | No                                         | Yes                                          | Yes                                   | Yes                                           | Yes                                      | Unclear                               | Yes                                       | No                                 | Unclear                                 | High                     |
| Chang (Beijing Hospital) <sup>163</sup>                                            | 2020-03-15                    | No                                         | Yes                                          | Yes                                   | Yes                                           | Yes                                      | Unclear                               | Yes                                       | No                                 | Unclear                                 | High                     |
| Zhao (Renmin Hospital of<br>Wuhan University)<br><sup>302</sup>                    | 2020-02-21                    | Yes                                        | No                                           | Yes                                   | No                                            | Unclear                                  | Unclear                               | Yes                                       | No                                 | Yes                                     | High                     |
| Chen (Nanjing University<br>Medical School) <sup>303</sup>                         | 2020-02-19                    | No                                         | Yes                                          | No                                    | Yes                                           | Yes                                      | Yes                                   | Yes                                       | No                                 | Yes                                     | High                     |
| Zhang (Shengjing Hospital<br>of China Medical<br>University)<br><sup>304 305</sup> | 2020-02-16                    | No                                         | No                                           | No                                    | Yes                                           | Unclear                                  | Yes                                   | Yes                                       | No                                 | Unclear                                 | High                     |
| To (Queen Mary Hospital)<br><sup>167</sup>                                         | 2020-02-13                    | No                                         | No                                           | Yes                                   | No                                            | No                                       | No                                    | Yes                                       | No                                 | Unclear                                 | High                     |
| To (Queen Mary Hospital)<br><sup>167</sup>                                         | 2020-01-31                    | No                                         | No                                           | Yes                                   | No                                            | No                                       | No                                    | Yes                                       | No                                 | Unclear                                 | High                     |
| Hallowell (US Centers for<br>Disease Control and<br>Prevention) <sup>168</sup>     | 2020-01-28                    | Yes                                        | Yes                                          | No                                    | Yes                                           | Yes                                      | Unclear                               | Yes                                       | No                                 | Yes                                     | Moderate                 |
| <b>Malaysia</b>                                                                    |                               |                                            |                                              |                                       |                                               |                                          |                                       |                                           |                                    |                                         |                          |
| Sam (University Malaya) <sup>169</sup>                                             | 2020-06-06                    | No                                         | No                                           | Yes                                   | No                                            | Unclear                                  | Yes                                   | Yes                                       | No                                 | Unclear                                 | High                     |
| <b>Thailand</b>                                                                    |                               |                                            |                                              |                                       |                                               |                                          |                                       |                                           |                                    |                                         |                          |
| Nopsopon (Chulalongkorn<br>University) <sup>306</sup>                              | 2020-06-26                    | Yes                                        | No                                           | Yes                                   | Yes                                           | Yes                                      | Yes                                   | Yes                                       | No                                 | Unclear                                 | Moderate                 |
| <b>Sub-Saharan Africa</b>                                                          |                               |                                            |                                              |                                       |                                               |                                          |                                       |                                           |                                    |                                         |                          |

| Article Author<br>(Study Organization)                                                          | Sampling End<br>Date<br>(YMD) | Item 1:<br>Appropriate<br>sample<br>frame* | Item 2:<br>Probability<br>sampling<br>method | Item 3:<br>Adequate<br>sample<br>size | Item 4:<br>Subjects &<br>setting<br>described | Item 5:<br>Good<br>coverage of<br>sample | Item 6: Sens<br>> 90% &<br>spec > 95% | Item 7: Same<br>tests for all<br>subjects | Item 8:<br>Appropriate<br>analysis | Item 9:<br>Adequate<br>response<br>rate | Overall Risk of<br>Bias† |
|-------------------------------------------------------------------------------------------------|-------------------------------|--------------------------------------------|----------------------------------------------|---------------------------------------|-----------------------------------------------|------------------------------------------|---------------------------------------|-------------------------------------------|------------------------------------|-----------------------------------------|--------------------------|
| <b>Ethiopia</b>                                                                                 |                               |                                            |                                              |                                       |                                               |                                          |                                       |                                           |                                    |                                         |                          |
| Kempen ( Kuwait<br>University) <sup>170</sup>                                                   | 2020-05-21                    | No                                         | No                                           | No                                    | Yes                                           | Unclear                                  | Yes                                   | Yes                                       | No                                 | Yes                                     | High                     |
| <b>Kenya</b>                                                                                    |                               |                                            |                                              |                                       |                                               |                                          |                                       |                                           |                                    |                                         |                          |
| Uyoga (KEMRI-Wellcome<br>Trust Research Programme) <sup>171</sup>                               | 2020-06-16                    | No                                         | No                                           | Yes                                   | Yes                                           | No                                       | No                                    | Yes                                       | No                                 | Unclear                                 | High                     |
| <b>Malawi</b>                                                                                   |                               |                                            |                                              |                                       |                                               |                                          |                                       |                                           |                                    |                                         |                          |
| Chibwana (Malawi-<br>Liverpool-Wellcome Trust<br>Clinical Research<br>Programme) <sup>307</sup> | 2020-06-19                    | Yes                                        | No                                           | No                                    | Yes                                           | Yes                                      | No                                    | Yes                                       | No                                 | Unclear                                 | High                     |
| <b>Nigeria</b>                                                                                  |                               |                                            |                                              |                                       |                                               |                                          |                                       |                                           |                                    |                                         |                          |
| Majiya (Ibrahim Badamasi<br>Babangida University) <sup>172</sup>                                | 2020-06-30                    | Yes                                        | Yes                                          | No                                    | Yes                                           | Yes                                      | Yes                                   | Yes                                       | No                                 | Unclear                                 | Moderate                 |
| Asuquo (Joseph Ukpo<br>Hospitals and Research<br>Institutes) <sup>308</sup>                     | 2020-06-24                    | Unclear                                    | Yes                                          | No                                    | No                                            | No                                       | Unclear                               | Yes                                       | No                                 | Unclear                                 | High                     |
| <b>Togo</b>                                                                                     |                               |                                            |                                              |                                       |                                               |                                          |                                       |                                           |                                    |                                         |                          |
| Halatoko (Universite de<br>Lome) <sup>309</sup>                                                 | 2020-05-08                    | Yes                                        | Yes                                          | Yes                                   | Yes                                           | Unclear                                  | No                                    | Yes                                       | No                                 | Unclear                                 | High                     |

**Supplementary Table 4. Summary of seroprevalence data for general and special population sub-groups**

| Population                                               | No. of studies | Median sample size [IQR] | Median unadjusted seroprevalence [IQR] | No. of studies with adjustable estimates | Median adjusted seroprevalence [IQR] | Risk of Bias                         |
|----------------------------------------------------------|----------------|--------------------------|----------------------------------------|------------------------------------------|--------------------------------------|--------------------------------------|
| <i>Study examining general population seroprevalence</i> | <b>184</b>     | <b>1200 [750-3873]</b>   | <b>3.6% [1.5-6.3%]</b>                 | <b>155</b>                               | <b>3.2% [1.0-6.4%]</b>               | <b>L: 5%, M: 51%, H: 36%, U: 8%</b>  |
| Household and community samples                          | 107            | 1071 [554-4030]          | 4.1% [1.7-8.1%]                        | 83                                       | 3.5% [1.2-8.5]                       | L: 9%, M: 50%, H: 29%, U: 12%        |
| Residual sera                                            | 40             | 1200 [884-1777]          | 2.9% [1.0-5.0%]                        | 39                                       | 2.7% [1.0-4.3]                       | L: 0%, M: 55%, H: 45%, U: 0%         |
| Blood donors                                             | 37             | 2199 [904-7691]          | 3.2% [2.0-6.8]                         | 33                                       | 2.8% [0.9-6.8]                       | L: 0%, M: 49%, H: 46%, U: 5%         |
| <i>Study examining special population</i>                | <b>153</b>     | <b>516 [150-1282]</b>    | <b>5.5% [1.6-14.4%]</b>                | <b>129</b>                               | <b>5.4% [1.5-18.4%]</b>              | <b>L: 1%, M: 12%, H: 77%, U: 10%</b> |
| Health care workers and caregivers                       | 81             | 500 [181-1485]           | 6.0% [2.2-14.5%]                       | 72                                       | 6.3% [2.1-18.8%]                     | L: 1%, M: 14%, H: 77%, U: 9%         |
| Patients seeking care for non-COVID-19 reasons           | 25             | 381 [149-879]            | 5.3% [2.3-11.0%]                       | 21                                       | 6.3% [2.8-17.8%]                     | L: 0%, M: 8%, H: 88%, U: 4%          |
| Multiple populations                                     | 16             | 1350 [418-7694]          | 2.5% [0.9-7.6%]                        | 13                                       | 3.3% [0.4-9.0%]                      | L: 0%, M: 6%, H: 81%, U: 12%         |
| Essential non-healthcare workers                         | 10             | 308 [166-923]            | 9.2% [2.0-15.2%]                       | 7                                        | 10.0% [1.8-26.3%]                    | L: 0%, M: 10%, H: 80%, U: 10%        |
| Pregnant or parturient women                             | 4              | 177 [137-486]            | 5.1% [3.5-5.9%]                        | 4                                        | 4.8% [3.4-5.7%]                      | L: 0%, M: 25%, H: 75%, U: 0%         |
| Persons who are incarcerated                             | 4              | 1034 [664-1212]          | 50.5% [29.2-72.5%]                     | 0                                        | -                                    | L: 0%, M: 0%, H: 0%, U: 100%         |
| Non-essential workers and unemployed persons             | 3              | 1589 [1272-3596]         | 0.7% [0.5-0.8%]                        | 2                                        | 0.2% [0.2-0.3%]                      | L: 0%, M: 0%, H: 67%, U: 33%         |
| Persons living in slums                                  | 3              | 873 [466-2537]           | 53.4% [44.7-53.8%]                     | 3                                        | 58.7% [48.7-77.6%]                   | L: 33%, M: 33%, H: 33%, U: 0%        |
| Contacts of COVID patients                               | 3              | 77 [54-125]              | 2.3% [1.2-16.7%]                       | 2                                        | 19.9% [10.7-29.0%]                   | L: 0%, M: 33%, H: 67%, U: 0%         |
| Assisted living and long-term care facilities            | 2              | 145 [142-147]            | 8.7% [4.4-13.0%]                       | 2                                        | 13.9% [7.4-20.5%]                    | L: 0%, M: 0%, H: 100%, U: 0%         |
| Hospital visitors                                        | 2              | 8527 [8399-8654]         | 1.4% [1.0-1.8%]                        | 2                                        | 0.5% [0.2-0.7%]                      | L: 0%, M: 0%, H: 100%, U: 0%         |
| Students                                                 | 1              | 1009 [1009-1009]         | 9.9% [9.9-9.9%]                        | 1                                        | 5.1% [5.1-5.1%]                      | L: 0%, M: 0%, H: 100%, U: 0%         |

Abbreviations: No.= number; IQR= interquartile range; L = low; M = moderate; H = high; U = unclear; GBD = global burden of disease region

**Supplementary Table 5. Summary of unadjusted meta-analysis results**

| Factor                               | Reference Group                           | Comparison Group                       | Number of Studies | Risk Ratio (95% CI)* | Heterogeneity (I <sup>2</sup> ) |
|--------------------------------------|-------------------------------------------|----------------------------------------|-------------------|----------------------|---------------------------------|
| Age                                  | Adults (18-64)                            | Seniors (65+)                          | 55                | 1.22 (1.04-1.42)     | 88.2%                           |
|                                      | Adults (18-64)                            | Youth (0-18)                           | 43                | 1.19 (1.03-1.38)     | 52.8%                           |
|                                      | Adults 18-64                              | -                                      | -                 | Reference            | -                               |
| Sex/Gender                           | Male                                      | Female                                 | 57                | 1.05 (0.97-1.14)     | 76.9%                           |
| Race                                 | White                                     | Black                                  | 19                | 1.89 (1.47-2.42)     | 89.1%                           |
|                                      | White                                     | Asian                                  | 12                | 1.44 (1.19-1.74)     | 68.5%                           |
|                                      | White                                     | Indigenous                             | 5                 | 3.13 (1.28-7.64)     | 69.7%                           |
|                                      | White                                     | -                                      | -                 | Reference            | -                               |
| Close contact with COVID-19 patients | Individuals with no close contact         | Individuals with close contact         | 8                 | 2.28 (1.55-3.34)     | 98.4%                           |
|                                      | Health care workers with no close contact | Health care workers with close contact | 13                | 1.35 (1.12-1.62)     | 89.0%                           |
| Health care worker status            | Non-health care workers and caregivers    | Health care workers and caregivers     | 9                 | 1.19 (0.82-1.71)     | 94.1%                           |

\*Using adjusted seroprevalence estimates. Abbreviations: CI= confidence interval.



**Supplementary Table 6. Summary of serological tests used**

| Manufacturer                                                             | Test Name                                                                                        | Isotype  | No. of studies |
|--------------------------------------------------------------------------|--------------------------------------------------------------------------------------------------|----------|----------------|
| EUROIMMUN AG                                                             | Anti-SARS-CoV-2 ELISA (IgG) (manual, automated)                                                  | IgG      | 39             |
|                                                                          | Anti-SARS-CoV-2 ELISA (IgA) (manual, automated)                                                  | IgA      | 7              |
|                                                                          | Anti-SARS-CoV-2 ELISA (IgA) (manual, automated); Anti-SARS-CoV-2 ELISA (IgG) (manual, automated) | IgA; IgG | 1              |
| Abbott Laboratories                                                      | Abbott Architect SARS-CoV-2 IgG                                                                  | IgG      | 37             |
|                                                                          | Abbott Alinity SARS-CoV-2 IgG                                                                    | IgG      | 1              |
|                                                                          | Unspecified SARS-CoV-2 IgG                                                                       | IgG      | 1              |
| Zhejiang Orient Gene Biotech                                             | COVID-19 IgG/IgM Rapid Test                                                                      | IgG      | 8              |
|                                                                          |                                                                                                  | IgG; IgM | 7              |
|                                                                          |                                                                                                  | IgM      | 7              |
| Guangzhou Wondfo Biotech Co., Ltd                                        | Wondfo SARS-CoV-2 Antibody Test (lateral flow method)                                            | IgG; IgM | 10             |
|                                                                          | Finecare SARS-CoV-2 Antibody test                                                                | Total Ig | 3              |
| Snibe Co., Ltd (Shenzhen New Industries Biomedical Engineering Co., Ltd) | MAGLUMI 2019-nCoV IgG (CLIA)                                                                     | IgG      | 7              |
|                                                                          | MAGLUMI 2019-nCoV IgM (CLIA)                                                                     | IgM      | 3              |
|                                                                          | MAGLUMI 2019-nCoV IgG (CLIA)                                                                     | IgM      | 2              |
| Zhuhai Livzon Diagnostics Inc                                            | 2019-nCoV IgG/IgM Antibody Detection Kit                                                         | IgG      | 4              |
|                                                                          |                                                                                                  | IgM      | 4              |
|                                                                          |                                                                                                  | IgG; IgM | 2              |
|                                                                          | Diagnostic Kit for IgM / IgG Antibody to Coronavirus (SARS-CoV-2) (Lateral Flow)                 | IgG; IgM | 1              |
| Shenzhen Yhlo Biotech Co. Ltd                                            | SARS-CoV-2 IgM and IgG chemiluminescence immunoassay                                             | IgG      | 5              |
|                                                                          |                                                                                                  | IgM      | 4              |
|                                                                          | SARS-CoV-2 IgM/IgG CLIA kits                                                                     | IgG      | 1              |
|                                                                          |                                                                                                  | IgM      | 1              |
| DiaSorin SpA                                                             | LIAISON® SARS-CoV-2 S1/S2 IgG                                                                    | IgG      | 9              |
|                                                                          | ISON® SARS-CoV-2 IgG kit                                                                         | IgG      | 2              |
| Beijing Wantai Biological Pharmacy Enterprise Co., Ltd                   | Wantai SARS-CoV-2 Ab ELISA                                                                       | Total Ig | 8              |
|                                                                          | Wantai SARS-CoV-2 IgM ELISA                                                                      | IgM      | 2              |
| BioMedomics, Inc.                                                        | COVID-19 IgM-IgG Dual Antibody Rapid Test                                                        | IgG      | 3              |
|                                                                          |                                                                                                  | IgM      | 3              |

|                                        |                                                                                              |          |   |
|----------------------------------------|----------------------------------------------------------------------------------------------|----------|---|
|                                        |                                                                                              | IgG; IgM | 2 |
| Roche                                  | Elecsys Anti-SARS-CoV-2                                                                      | IgG; IgM | 4 |
|                                        |                                                                                              | Total Ig | 3 |
| Epitope Diagnostics, Inc.              | EDI™ Novel Coronavirus COVID-19 IgG ELISA Kit                                                | IgG      | 5 |
|                                        | EDI™ Novel Coronavirus COVID-19 IgM ELISA Kit                                                | IgM      | 1 |
|                                        | EDI™ Novel Coronavirus COVID-19 IgM ELISA Kit; EDI™ Novel Coronavirus COVID-19 IgG ELISA Kit | IgG; IgM | 1 |
| Innovita Biological Technology Co. Ltd | 2019-nCoV Ab Test (Colloidal Gold) (IgM/IgG Whole Blood/Serum/Plasma Combo)                  | IgG; IgM | 2 |
|                                        | 2019 nCoV Ab test                                                                            | IgG      | 1 |
|                                        |                                                                                              | IgM      | 1 |
|                                        | 2019-nCoV Ab Test (Colloidal Gold) (IgM/IgG Whole Blood/Serum/Plasma Combo)                  | IgG      | 1 |
| SARS-CoV-2 IgG Ab Rapid Test           | IgM                                                                                          | 1        |   |
| Artron Laboratories Inc.               | One Step Novel Coronavirus (COVID-19) IgM/IgG Antibody Test                                  | IgG; IgM | 3 |
|                                        |                                                                                              | IgG      | 1 |
|                                        |                                                                                              | IgM      | 1 |
| Ortho Clinical Diagnostics Inc.        | VITROS® Immunodiagnostic Products Anti-SARS-CoV-2 IgG                                        | IgG      | 3 |
|                                        | VITROS® Immunodiagnostic Products Anti-SARS-CoV-2 Total                                      | Total Ig | 3 |
| Healgen                                | COVID-19 IgG/IgM Rapid Test Cassette                                                         | IgG      | 1 |
|                                        |                                                                                              | IgG; IgM | 1 |
|                                        |                                                                                              | IgM      | 1 |
| Hangzhou Clongene Biotech Co., Ltd     | 2019-nCoV IgG/IgM Rapid Test                                                                 | IgG      | 1 |
|                                        |                                                                                              | IgG; IgM | 1 |
|                                        |                                                                                              | IgM      | 1 |
| ACRO Biotech Inc.                      | Acro Biotech COVID-19 Rapid POC test                                                         | IgM      | 2 |
|                                        |                                                                                              | IgG      | 1 |
|                                        | Not available                                                                                | IgG; IgM | 2 |
| nal von minden GmbH                    | NADAL® COVID-19 IgG/IgM Test                                                                 | IgG      | 1 |
|                                        |                                                                                              | IgM      | 1 |
| VivaChek Biotech (Hangzhou) Co., Ltd   | VivaDiag COVID-19 IgM/IgG Rapid Test                                                         | IgG; IgM | 2 |
| Vircell S.L.                           | COVID-19 ELISA IgG                                                                           | IgG      | 1 |
|                                        | COVID-19 ELISA IgM+IgA                                                                       | IgA; IgM | 1 |

|                                                       |                                                                                                    |          |    |
|-------------------------------------------------------|----------------------------------------------------------------------------------------------------|----------|----|
| Shenzhen Yahuilong Biotechnology Co Ltd               | 2019-nCoV IgG/IgM Antibody Detection Kit                                                           | IgG      | 1  |
|                                                       |                                                                                                    | IgM      | 1  |
| Premier Biotech                                       | COVID-19 IgG/IgM Rapid Test Cassette                                                               | IgG; IgM | 2  |
| PRIMA Lab S.A.                                        | PRIMA COVID-19 IgG/IgM Rapid Test                                                                  | IgG; IgM | 2  |
| ImmunoDiagnostics limited                             | SARS-CoV-2 NP IgG ELISA Kit                                                                        | IgG      | 1  |
|                                                       | SARS-CoV-2 NP IgM ELISA Kit                                                                        | IgM      | 1  |
| Xiamen Wantai Kairui Biotechnology                    | Not available                                                                                      | Total Ig | 1  |
| Wadsworth Center, New York State Department of Health | New York SARS-CoV Microsphere Immunoassay for Antibody Detection                                   | Total Ig | 1  |
| Tangshan Yingnuote Biotechnology Enterprise Co., Ltd. | Colloidal Gold Immunochromatography Assay (CGIA) kit                                               | IgG; IgM | 1  |
| Sugentech, Inc.                                       | SGTi-flex COVID-19 IgM/IgG (manual)                                                                | IgG; IgM | 1  |
| Phamatech                                             | COVID19 RAPID TEST                                                                                 | IgG; IgM | 1  |
| PCL Inc.                                              | PCL COVID19 IgG/IgM Rapid Gold                                                                     | IgG; IgM | 1  |
| Multi-G B.V.                                          | COVID-19 IgG/IgM Ab Test Cassette (Whole Blood/Serum/Plasma)                                       | IgG      | 1  |
| Hangzhou Biotest Biotech Co., Ltd                     | COVID-19 IgG/IgM Rapid Test Cassette                                                               | IgG; IgM | 1  |
| Hangzhou AllTest Biotech Co., Ltd                     | 2019-nCoV IgG/IgM Rapid Test Cassette                                                              | IgG      | 1  |
| DRG International, Inc.                               | Novel Coronavirus COVID-19 IgG                                                                     | IgG      | 1  |
| CTK Biotech, Inc.                                     | OnSite COVID-19 IgG/IgM Rapid Test                                                                 | IgG; IgM | 1  |
| No independent evaluation available                   | Not enough test information reported to match                                                      | -        | 55 |
|                                                       | Author designed or validated test, not in Finddx database                                          | -        | 48 |
|                                                       | Commercially available but not in the Finddx database                                              | -        | 38 |
|                                                       | Multiple tests used in combination                                                                 | -        | 8  |
|                                                       | Multiple tests used NOT in combination                                                             | -        | 4  |
|                                                       | Evaluations for separate isotypes, review authors report combined positivity rate (and/or isotype) | -        | 4  |
|                                                       | Evaluation for combined isotype, study examined individual isotypes                                | -        | 4  |
|                                                       | No match for index specimen type                                                                   | -        | 2  |

**Supplementary Table 7. Summary of meta-regression results**

| Study Characteristics                                                                                                                                                                                                                                                                                                                                                                                                                                                                                                                                                                                                                                                                                                                                                                                                                                        | Analysis using uncorrected seroprevalence estimates                     |                     |         | Analysis using corrected seroprevalence estimates                       |                     |         |
|--------------------------------------------------------------------------------------------------------------------------------------------------------------------------------------------------------------------------------------------------------------------------------------------------------------------------------------------------------------------------------------------------------------------------------------------------------------------------------------------------------------------------------------------------------------------------------------------------------------------------------------------------------------------------------------------------------------------------------------------------------------------------------------------------------------------------------------------------------------|-------------------------------------------------------------------------|---------------------|---------|-------------------------------------------------------------------------|---------------------|---------|
|                                                                                                                                                                                                                                                                                                                                                                                                                                                                                                                                                                                                                                                                                                                                                                                                                                                              | Change in Seroprevalence (coefficient $\beta$ ) <sup>*,†</sup> (95% CI) | Risk ratio (95% CI) | p-value | Change in Seroprevalence (coefficient $\beta$ ) <sup>*,‡</sup> (95% CI) | Risk ratio (95% CI) | p-value |
| <b>Risk of Bias</b>                                                                                                                                                                                                                                                                                                                                                                                                                                                                                                                                                                                                                                                                                                                                                                                                                                          |                                                                         |                     |         |                                                                         |                     |         |
| High                                                                                                                                                                                                                                                                                                                                                                                                                                                                                                                                                                                                                                                                                                                                                                                                                                                         | 0.65 (0.12, 1.18)                                                       | 1.92 (1.13, 3.25)   | 0.02    | 0.84 (0.12, 1.57)                                                       | 2.32 (1.13, 4.81)   | 0.02    |
| Moderate                                                                                                                                                                                                                                                                                                                                                                                                                                                                                                                                                                                                                                                                                                                                                                                                                                                     | 0.86 (0.37, 1.35)                                                       | 2.36 (1.45, 3.86)   | <0.01   | 0.98 (0.32, 1.64)                                                       | 2.66 (1.38, 5.16)   | <0.01   |
| Low                                                                                                                                                                                                                                                                                                                                                                                                                                                                                                                                                                                                                                                                                                                                                                                                                                                          | Reference                                                               | -                   | -       | Reference                                                               | -                   | -       |
| Unclear                                                                                                                                                                                                                                                                                                                                                                                                                                                                                                                                                                                                                                                                                                                                                                                                                                                      | 0.13 (-0.49, 0.75)                                                      | 1.14 (0.61, 2.12)   | 0.68    | -0.30 (-2.25, 1.65)                                                     | 0.74 (0.11, 5.21)   | 0.76    |
| <b>Population Group</b>                                                                                                                                                                                                                                                                                                                                                                                                                                                                                                                                                                                                                                                                                                                                                                                                                                      |                                                                         |                     |         |                                                                         |                     |         |
| Household and community sample                                                                                                                                                                                                                                                                                                                                                                                                                                                                                                                                                                                                                                                                                                                                                                                                                               | Reference                                                               | -                   | -       | Reference                                                               | -                   | -       |
| Blood donors                                                                                                                                                                                                                                                                                                                                                                                                                                                                                                                                                                                                                                                                                                                                                                                                                                                 | -0.22 (-0.51, 0.07)                                                     | 0.80 (0.60, 1.07)   | 0.14    | -0.44 (-0.86, -0.02)                                                    | 0.64 (0.42, 0.98)   | 0.04    |
| Residual sera                                                                                                                                                                                                                                                                                                                                                                                                                                                                                                                                                                                                                                                                                                                                                                                                                                                | -0.47 (-0.78, -0.16)                                                    | 0.63 (0.46, 0.85)   | <0.01   | -0.47 (-0.90, -0.04)                                                    | 0.63 (0.41, 0.96)   | 0.03    |
| <b>Estimate Grade</b>                                                                                                                                                                                                                                                                                                                                                                                                                                                                                                                                                                                                                                                                                                                                                                                                                                        |                                                                         |                     |         |                                                                         |                     |         |
| National                                                                                                                                                                                                                                                                                                                                                                                                                                                                                                                                                                                                                                                                                                                                                                                                                                                     | Reference                                                               | -                   | -       | Reference                                                               | -                   | -       |
| Regional                                                                                                                                                                                                                                                                                                                                                                                                                                                                                                                                                                                                                                                                                                                                                                                                                                                     | 0.08 (-0.20, 0.36)                                                      | 1.08 (0.82, 1.43)   | 0.58    | 0.02 (-0.38, 0.41)                                                      | 1.02 (0.68, 1.51)   | 0.94    |
| Local                                                                                                                                                                                                                                                                                                                                                                                                                                                                                                                                                                                                                                                                                                                                                                                                                                                        | 0.48 (0.18, 0.77)                                                       | 1.62 (1.20, 2.16)   | <0.01   | 0.52 (0.09, 0.96)                                                       | 1.68 (1.09, 2.61)   | 0.02    |
| Sublocal                                                                                                                                                                                                                                                                                                                                                                                                                                                                                                                                                                                                                                                                                                                                                                                                                                                     | 0.88 (0.12, 1.63)                                                       | 2.41 (1.13, 5.10)   | 0.02    | 0.80 (-0.29, 1.90)                                                      | 2.23 (0.75, 6.69)   | 0.15    |
| <b>Days Since 100<sup>th</sup> Confirmed Case</b>                                                                                                                                                                                                                                                                                                                                                                                                                                                                                                                                                                                                                                                                                                                                                                                                            |                                                                         |                     |         |                                                                         |                     |         |
| Per Day                                                                                                                                                                                                                                                                                                                                                                                                                                                                                                                                                                                                                                                                                                                                                                                                                                                      | 0.007 (0.004, 0.011)                                                    | 1.01 (1.00, 1.01)   | <0.01   | 0.009 (0.005, 0.014)                                                    | 1.01 (1.00, 1.01)   | <0.01   |
| <b>WHO GBD Region</b>                                                                                                                                                                                                                                                                                                                                                                                                                                                                                                                                                                                                                                                                                                                                                                                                                                        |                                                                         |                     |         |                                                                         |                     |         |
| High-Income                                                                                                                                                                                                                                                                                                                                                                                                                                                                                                                                                                                                                                                                                                                                                                                                                                                  | Reference                                                               | -                   | -       | Reference                                                               | -                   | -       |
| North Africa and Middle East                                                                                                                                                                                                                                                                                                                                                                                                                                                                                                                                                                                                                                                                                                                                                                                                                                 | 0.76 (-0.48, 2.00)                                                      | 2.14 (0.62, 7.39)   | 0.23    | -0.64 (-2.16, 0.87)                                                     | 0.53 (0.12, 2.39)   | 0.40    |
| Southeast Asia, East Asia, and Oceania                                                                                                                                                                                                                                                                                                                                                                                                                                                                                                                                                                                                                                                                                                                                                                                                                       | -1.46 (-1.97, -0.95)                                                    | 0.23 (0.14, 0.39)   | <0.01   | -1.59 (-2.24, -0.93)                                                    | 0.20 (0.11, 0.39)   | <0.01   |
| Central Europe, Eastern Europe, and Central Asia                                                                                                                                                                                                                                                                                                                                                                                                                                                                                                                                                                                                                                                                                                                                                                                                             | 0.23 (-0.56, 1.01)                                                      | 1.26(0.57, 2.75)    | 0.57    | -0.37 (-1.67, 0.93)                                                     | 0.69 (0.19, 2.53)   | 0.57    |
| Latin America and Caribbean                                                                                                                                                                                                                                                                                                                                                                                                                                                                                                                                                                                                                                                                                                                                                                                                                                  | -0.48 (-0.84, -0.13)                                                    | 0.61 (0.43, 0.88)   | <0.01   | -0.70 (-1.20, -0.21)                                                    | 0.50 (0.30, 0.81)   | <0.01   |
| South Asia                                                                                                                                                                                                                                                                                                                                                                                                                                                                                                                                                                                                                                                                                                                                                                                                                                                   | 0.73 (0.24, 1.22)                                                       | 2.08 (1.27, 3.39)   | <0.01   | 0.67 (-0.13, 1.46)                                                      | 1.95 (0.88, 4.31)   | 0.10    |
| Sub-Saharan Africa                                                                                                                                                                                                                                                                                                                                                                                                                                                                                                                                                                                                                                                                                                                                                                                                                                           | 0.89 (0.04, 1.72)                                                       | 2.44 (1.04, 5.58)   | 0.04    | 1.07 (0.0001, 2.14)                                                     | 2.92 (1.00, 8.50)   | 0.05    |
| <p>*The regression coefficient <math>\beta</math> refers to the change in the log seroprevalence of antibodies to SARS-CoV-2 given changes in the covariate. †Details of uncorrected model: Intercept coefficient <math>\beta</math> -4.56 (95%CI -5.15, -3.98); Mixed-Effects Model (k = 184); tau<sup>2</sup> 0.4469 (SE = 0.2335); I<sup>2</sup>=99.51%. Test of Moderators (coefficients 2:16):QM(df = 15) = 83.9183, p-val &lt; .0001.</p> <p>‡Details of corrected model: Intercept coefficient <math>\beta</math> -4.94 (95%CI -5.75, -4.13); Mixed-Effects Model (k = 155); tau<sup>2</sup> =0.8009 (SE =0.2651); I<sup>2</sup>=99.31%. Test of Moderators (coefficients 2:16):QM(df = 15) = 122.1417, p-val &lt; .0001.</p> <p>Abbreviations: B=beta; CI = confidence interval; WHO = world health organization; GBD = global burden of disease</p> |                                                                         |                     |         |                                                                         |                     |         |

**Supplementary Figure 1. Map of serosurvey distribution by global burden of disease region**

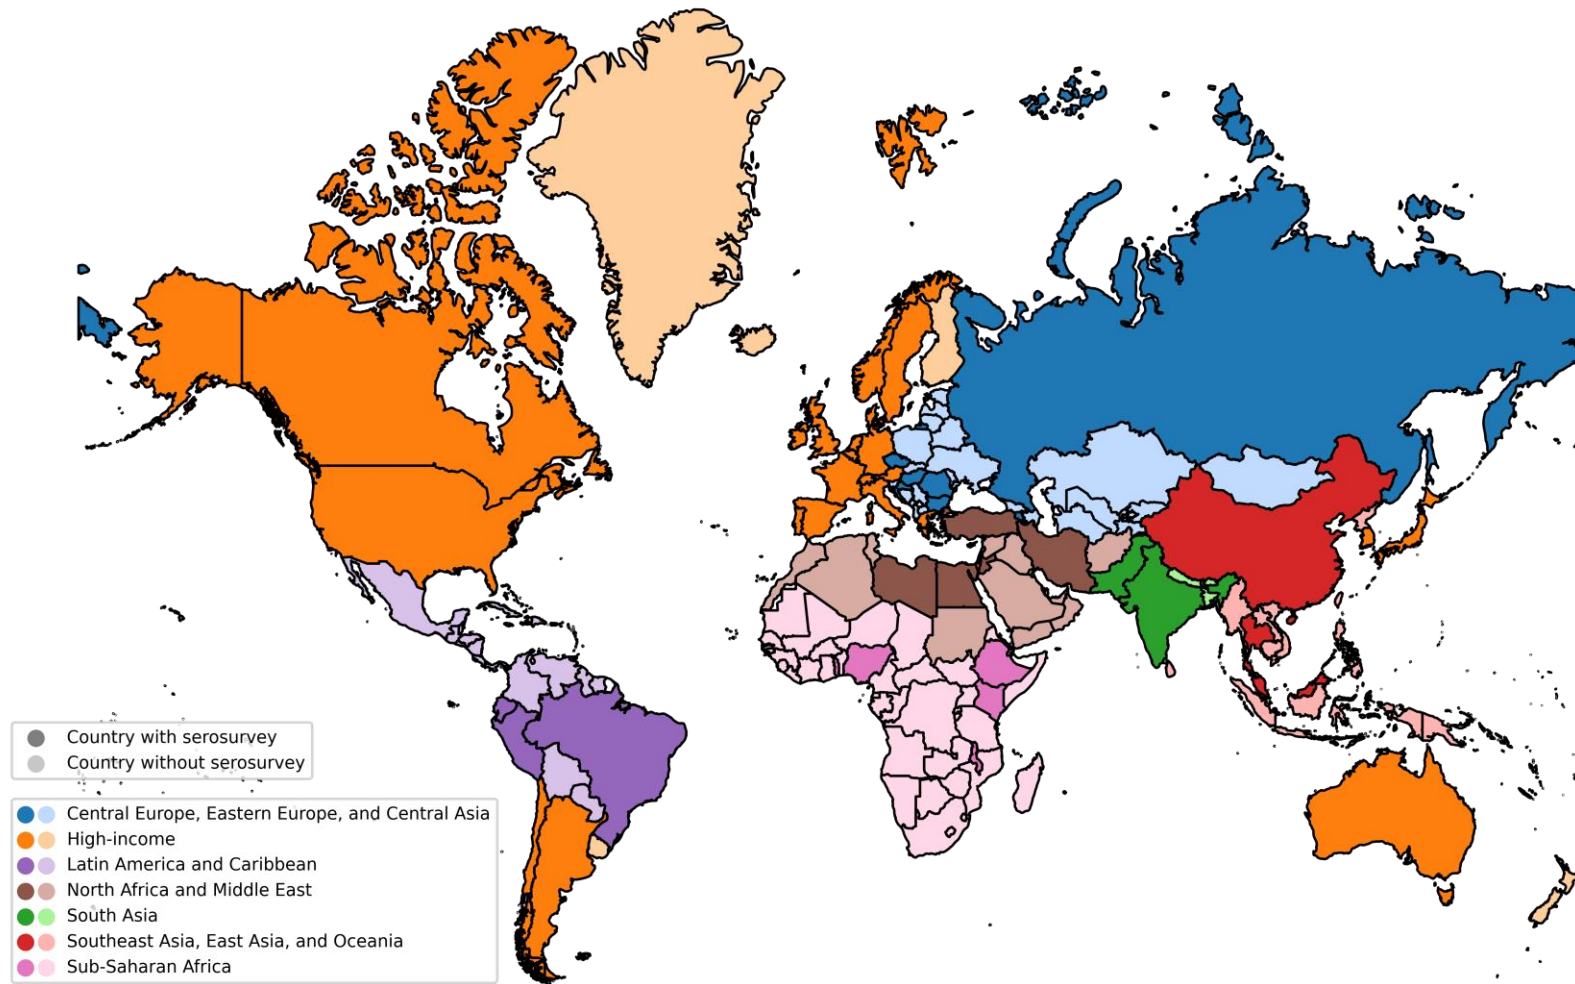

The number of countries reporting any serosurvey in each GBD region were: Central Europe, Eastern Europe, and Central Asia (n=7); in High Income regions (n=25); in Latin America and Caribbean (n=3); in North Africa and Middle East (n=5); in South Asia (n=2); in Southeast Asia, East Asia, and Oceania (3); and in Sub-Saharan Africa (n=5).

Supplementary Figure 2. Seroprevalence to cumulative case incidence ratios using cumulative incidence on the same day as the serosurvey end date

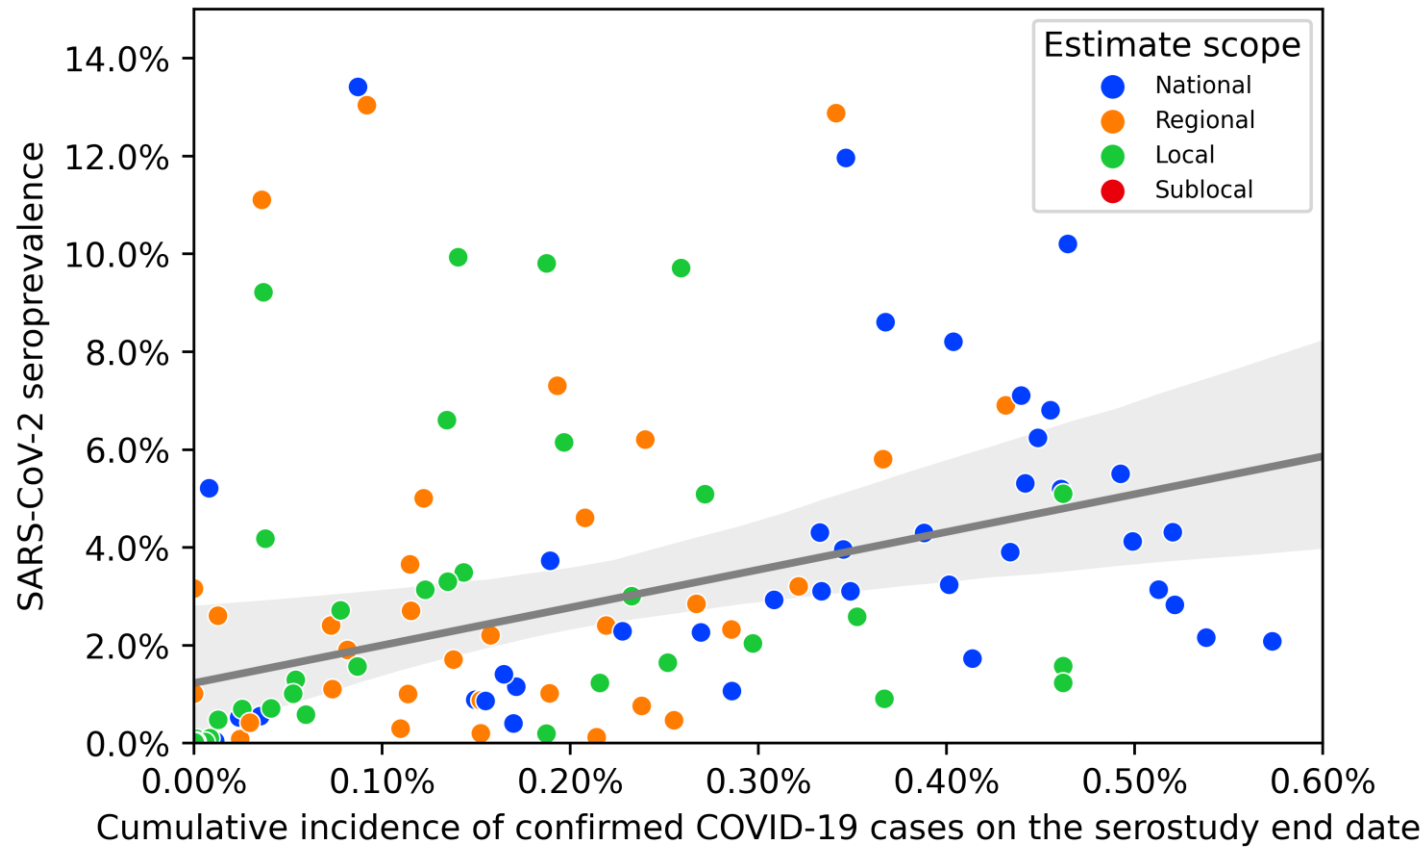

The median ratio between corrected seroprevalence estimates and the corresponding cumulative incidence of SARS-CoV-2 infection was 11.9 (IQR 6.0 – 24.2).

Supplementary Figure 3. Seroprevalence to cumulative case incidence ratios using cumulative incidence 14 days prior to the serosurvey end date

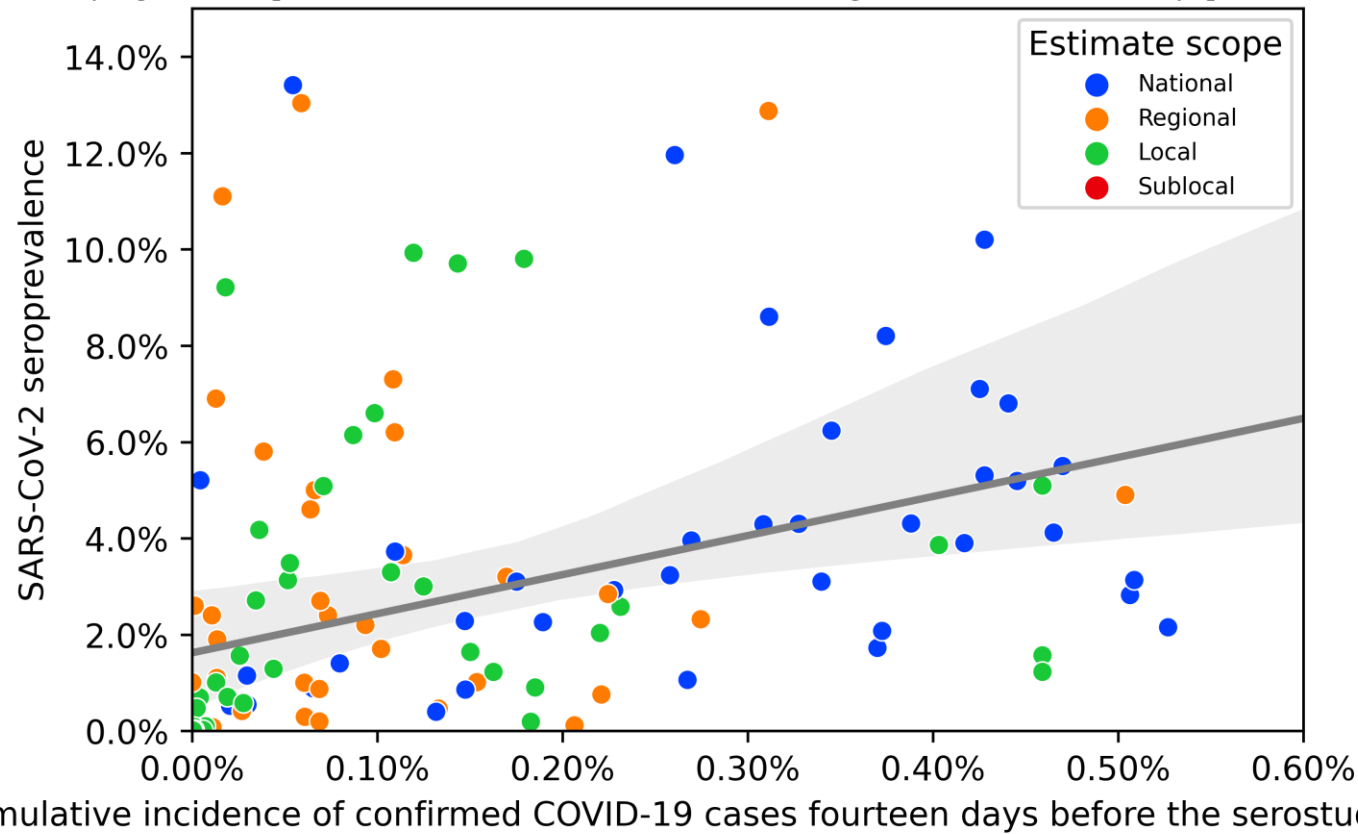

The median ratio between corrected seroprevalence estimates and the corresponding cumulative incidence of SARS-CoV-2 infection was 16.9 (IQR 9.2 – 56.7)

## References

1. Wolters Kluwer. COVID-19 Tools and Resources for Clinicians: Expert Searches [Internet]. 2020. Available from: [https://tools.ovid.com/coronavirus/?utm\\_source=marketo&utm\\_medium=email&utm\\_campaign=0-v035&utm\\_term=all%20ovid&mkt\\_tok=eyJpIjoiWkRRM01qWXIPRFV5TnpKbCIsInQiOiIyVZWOUYyRFJJYlg1ZUR4T29sY0tCMGpWcHBVbnpTQWpLTGZQb0RjbnlidUQ2U3lVekxCWjNrN0U4SkZLOE9sM0IHTUlmdXEzM XJcL0pWQkhSzdGYU92cXJlRXZ4T3BMc2tmT1ZFMmh2Z09cL0d1MEh6RnowK2NjMGRUbEZSdGQ0VmpQ UmpybkIjWEpPVnFDUTdnZnlRUT09In0%3D](https://tools.ovid.com/coronavirus/?utm_source=marketo&utm_medium=email&utm_campaign=0-v035&utm_term=all%20ovid&mkt_tok=eyJpIjoiWkRRM01qWXIPRFV5TnpKbCIsInQiOiIyVZWOUYyRFJJYlg1ZUR4T29sY0tCMGpWcHBVbnpTQWpLTGZQb0RjbnlidUQ2U3lVekxCWjNrN0U4SkZLOE9sM0IHTUlmdXEzM XJcL0pWQkhSzdGYU92cXJlRXZ4T3BMc2tmT1ZFMmh2Z09cL0d1MEh6RnowK2NjMGRUbEZSdGQ0VmpQ UmpybkIjWEpPVnFDUTdnZnlRUT09In0%3D)
2. Cheng MP, Yansouni CP, Basta NE, Desjardins M, Kanjilal S, Paquette K, et al. Serodiagnostics for Severe Acute Respiratory Syndrome–Related Coronavirus 2. *Ann Intern Med*. 2020 Jun 4;173(6):450–60.
3. Boseley S. WHO warns that few have developed antibodies to Covid-19. *The Guardian* [Internet]. 2020 Apr 20; Available from: <https://www.theguardian.com/society/2020/apr/20/studies-suggest-very-few-have-had-covid-19-without-symptoms>
4. Munn Z, Moola S, Lisy K, Riitano D, Tufanaru C. Methodological guidance for systematic reviews of observational epidemiological studies reporting prevalence and cumulative incidence data. *Int J Evid Based Healthc*. 2015 Sep;13(3):147–53.
5. Naing L, Winn T, Ruslil B. Practical issues in calculating the sample size for prevalence studies. *Arch Orofasc Sci*. 2006;1:9–14.
6. U.S. Food & Drug Administration. Emergency Use Authorization for SARS-CoV-2 Antibody Tests [Internet]. 2020 [cited 2020 May 5]. Available from: <https://www.fda.gov/media/137470/download>.
7. World Health Organization. Population-based age-stratified seroepidemiological investigation protocol for COVID-19 virus infection [Internet]. 2020 Mar. Available from: <https://apps.who.int/iris/handle/10665/331656>
8. Institute for Health Metrics and Evaluation. Global Burden of Disease Study 2019 (GBD 2019) Data Resources [Internet]. [cited 2020 Nov 11]. Available from: <http://ghdx.healthdata.org/gbd-2019>;
9. Institute for Health Metrics and Evaluation. Institute for Health Metrics and Evaluation Frequently Asked Questions [Internet]. [cited 2020 Nov 11]. Available from: <http://www.healthdata.org/gbd/faq>
10. World Health Organization. Mortality and global health estimates [Internet]. World Health Data Platform. 2020. Available from: <https://www.who.int/data/gho/data/themes/mortality-and-global-health-estimates>
11. FIND. SARS-CoV-2 diagnostics: performance data [Internet]. 2020. Available from: <https://www.finddx.org/covid-19/dx-data/>
12. Lisboa Bastos M, Tavaziva G, Abidi SK, Campbell JR, Haraoui L-P, Johnston JC, et al. Diagnostic accuracy of serological tests for covid-19: systematic review and meta-analysis. *BMJ*. 2020 Jul 1;370:m2516.
13. Bwire GM, Majigo MV, Njiro BJ, Mawazo A. Detection profile of SARS-CoV-2 using RT-PCR in different types of clinical specimens: A systematic review and meta-analysis. *J Med Virol* [Internet]. 2020 Jul 24 [cited 2020 Nov 12];n/a(n/a). Available from: <https://doi.org/10.1002/jmv.26349>
14. Gelman A, Carpenter B. Bayesian analysis of tests with unknown specificity and sensitivity. *J R Stat Soc Ser C Appl Stat*. 2020 Nov 1;69(5):1269–83.
15. Betancourt M. A Conceptual Introduction to Hamiltonian Monte Carlo. *ArXiv170102434 Stat* [Internet]. 2018 Jul 15 [cited 2020 Nov 12]; Available from: <http://arxiv.org/abs/1701.02434>
16. Bolotin S, Tran V, Osman S, Brown KA, Buchan SA, Joh E, et al. SARS-CoV-2 seroprevalence survey estimates are affected by anti-nucleocapsid antibody decline. *medRxiv*. 2020 Jan 1;2020.09.28.20200915.
17. Ward H, Cooke G, Atchison C, Whitaker M, Elliott J, Moshe M, et al. Declining prevalence of antibody positivity to SARS-CoV-2: a community study of 365,000 adults. *medRxiv*. 2020 Jan 1;2020.10.26.20219725.
18. Wajnberg A, Amanat F, Firpo A, Altman DR, Bailey MJ, Mansour M, et al. Robust neutralizing antibodies to SARS-CoV-2 infection persist for months. *Science*. 2020 Oct 28;eabd7728.
19. Isho B, Abe KT, Zuo M, Jamal AJ, Rathod B, Wang JH, et al. Persistence of serum and saliva antibody responses to SARS-CoV-2 spike antigens in COVID-19 patients. *Sci Immunol*. 2020 Oct 8;5(52):eabe5511.
20. Wilson N, Kvalsvig A, Barnard LT, Baker M. Case-Fatality Risk Estimates for COVID-19 Calculated by Using a Lag Time for Fatality. *Emerg Infect Dis J*. 2020;26(6):1339.
21. Vanella P, Wiessner C, Holz A, Krause G, Moehl A, Wiegel S, et al. The role of age distribution, time lag between reporting and death and healthcare system capacity on case fatality estimates of COVID-19. *medRxiv*. 2020 Jan 1;2020.05.16.20104117.
22. Wiersinga WJ, Rhodes A, Cheng AC, Peacock SJ, Prescott HC. Pathophysiology, Transmission, Diagnosis, and Treatment of Coronavirus Disease 2019 (COVID-19): A Review. *JAMA*. 2020 Aug 25;324(8):782–93.
23. Guo L, Ren L, Yang S, Xiao M, Chang D, Yang F, et al. Profiling Early Humoral Response to Diagnose Novel Coronavirus Disease (COVID-19). *Clin Infect Dis*. 2020 Jul 28;71(15):778–85.
24. Dong E, Du H, Gardner L. An interactive web-based dashboard to track COVID-19 in real time. *Lancet Infect Dis*. 2020 May;20(5):533–4.
25. United Nations, Department of Economics and Social Affairs, Population Division. 2019 Revision of World Population Prospects [Internet]. [cited 2020 Nov 11]. Available from: <https://population.un.org/wpp/>



26. European Centre for Disease Prevention and Control. Sources - Worldwide data on COVID-19 [Internet]. 2020 [cited 2020 Nov 11]. Available from: <https://www.ecdc.europa.eu/en/publications-data/sources-worldwide-data-covid-19>
27. European Centre for Disease Prevention and Control. Sources – EU/EEA and UK regional data on COVID-19 [Internet]. 2020 [cited 2020 Nov 11]. Available from: <https://www.ecdc.europa.eu/en/publications-data/sources-eueea-and-uk-regional-data-covid-19>
28. John Hopkins Center for Systems Science and Engineering. COVID-19 Time Series Summary [Internet]. GitHub Repository. 2020. Available from: [https://github.com/CSSEGISandData/COVID-19/tree/master/csse\\_covid\\_19\\_data/csse\\_covid\\_19\\_time\\_series](https://github.com/CSSEGISandData/COVID-19/tree/master/csse_covid_19_data/csse_covid_19_time_series)
29. Wikimedia Foundation. 2019–20 coronavirus pandemic by country and territory [Internet]. Wikipedia. 2020. Available from: [https://en.wikipedia.org/wiki/2019%E2%80%9320\\_coronavirus\\_pandemic\\_by\\_country\\_and\\_territory](https://en.wikipedia.org/wiki/2019%E2%80%9320_coronavirus_pandemic_by_country_and_territory)
30. for the HUNGarian COroNaVirus-19 Epidemiological Research (H-UNCOVER) investigators, Merkely B, Szabó AJ, Kosztin A, Berényi E, Sebestyén A, et al. Novel coronavirus epidemic in the Hungarian population, a cross-sectional nationwide survey to support the exit policy in Hungary. *GeroScience*. 2020 Aug;42(4):1063–74.
31. Odinkov E. Large-scale antibody testing reveals that over 2 million Muscovites may already have contracted Covid-19 [Internet]. RT. 2020. Available from: <https://www.rt.com/russia/493055-moscow-mass-antibody-testing/>
32. Kiselyov S. 1 in 7 Russians Have ‘Coronavirus Immunity’ – Official [Internet]. The Moscow Times. 2020. Available from: <https://www.themoscowtimes.com/2020/06/10/1-in-7-russians-have-coronavirus-immunity-official-a70540>
33. Knabl L, Mitra T, Kimpel J, Roessler A, Volland A, Walser A, et al. High SARS-CoV-2 Seroprevalence in Children and Adults in the Austrian Ski Resort Ischgl. *medRxiv*. 2020 Aug 22;2020.08.20.20178533.
34. Herzog S, Bie JD, Abrams S, Wouters I, Ekinci E, Patteet L, et al. Seroprevalence of IgG antibodies against SARS coronavirus 2 in Belgium: a serial prospective cross-sectional nationwide study of residual samples. *medRxiv*. 2020 Oct 1;2020.06.08.20125179.
35. Héma-Québec. BLOOD DONOR SEROPREVALENCE STUDY: 2.23% OF QUEBEC ADULTS CONTRACTED COVID-19 [Internet]. Héma-Québec. 2020. Available from: <https://www.hema-quebec.qc.ca/publications/communiqués/archives/2020/communiqués-2020/etude-seroprevalence-resultats.en.html>
36. COVID-19 Immunity Task Force. The COVID-19 Immunity Task Force welcomes the results of the blood donor seroprevalence study led by Hema-Quebec [Internet]. 2020 Aug. Available from: <https://www.covid19immunitytaskforce.ca/the-covid-19-immunity-task-force-welcomes-the-results-of-the-blood-donor-seroprevalence-study-led-by-hema-quebec/>
37. Public Health Ontario. COVID-19 Seroprevalence in Ontario: March 27, 2020 to June 30, 2020 [Internet]. Public Health Ontario; 2020 Jul p. 10. (COVID-19 Serosurveillance Summary). Available from: <https://www.publichealthontario.ca/-/media/documents/ncov/epi/2020/07/covid-19-epi-seroprevalence-in-ontario.pdf?la=en>
38. COVID-19 Immunity Task Force. COVID-19 Immunity Task Force welcomes first results from public health Ontario’s serosurveillance program [Internet]. COVID-19 Immunity Task Force; 2020 Jul. Available from: <https://www.covid19immunitytaskforce.ca/covid-19-immunity-task-force-welcomes-first-results-from-public-health-ontarios-serosurveillance-program/>
39. Canadian Blood Services. COVID-19 Seroprevalence Report – August 19, 2020 [Internet]. 2020 Aug. Available from: [https://www.covid19immunitytaskforce.ca/wp-content/uploads/2020/09/COVID-19-Public-Report\\_2.pdf](https://www.covid19immunitytaskforce.ca/wp-content/uploads/2020/09/COVID-19-Public-Report_2.pdf)
40. Skowronski DM, Sekirov I, Sabaiduc S, Zou M, Morshed M, Lawrence D, et al. Low SARS-CoV-2 sero-prevalence based on anonymized residual sero-survey before and after first wave measures in British Columbia, Canada, March-May 2020. *medRxiv*. 2020 Jul 15;2020.07.13.20153148.
41. Jespersen S, Mikkelsen S, Greve T, Kaspersen KA, Tolstrup M, Boldsen JK, et al. SARS-CoV-2 seroprevalence survey among 18,000 healthcare and administrative personnel at hospitals, pre-hospital services, and specialist practitioners in the Central Denmark Region. *medRxiv* [Internet]. 2020 Aug 12 [cited 2020 Oct 27]; Available from: <http://medrxiv.org/lookup/doi/10.1101/2020.08.10.20171850>
42. Erikstrup C, Hother CE, Pedersen OBV, Mølbak K, Skov RL, Holm DK, et al. Estimation of SARS-CoV-2 infection fatality rate by real-time antibody screening of blood donors. *medRxiv*. 2020 Apr 28;2020.04.24.20075291.
43. Petersen MS, Strøm M, Christiansen DH, Fjallsbak JP, Eliassen EH, Johansen M, et al. Seroprevalence of SARS-CoV-2–Specific Antibodies, Faroe Islands. *Emerg Infect Dis*. 2020 Nov;26(11):2760–2.
44. Iversen K, Bundgaard H, Hasselbalch RB, Kristensen JH, Nielsen PB, Pries-Heje M, et al. Risk of COVID-19 in health-care workers in Denmark: an observational cohort study. *Lancet Infect Dis*. 2020 Aug 3;
45. Cohen R, Jung C, Ouldali N, Sellam A, Batard C, Cahn-Sellem F, et al. Assessment of spread of SARS-CoV-2 by RT-PCR and concomitant serology in children in a region heavily affected by COVID-19 pandemic. *medRxiv* [Internet]. 2020 Jun 14; Available from: <https://www.medrxiv.org/content/10.1101/2020.06.12.20129221v1>
46. Fontanet A, Grant R, Tondeur L, Madec Y, Grzelak L, Cailleau I, et al. SARS-CoV-2 infection in primary schools in northern France: A retrospective cohort study in an area of high transmission. *medRxiv*. 2020 Jun 29;2020.06.25.20140178.

47. Gallian P, Pastorino B, Morel P, Chiaroni J, Ninove L, de Lamballerie X. Lower prevalence of antibodies neutralizing SARS-CoV-2 in group O French blood donors. *Antiviral Res.* 2020 Sep;181:104880.
48. Fischer B, Knabbe C, Vollmer T. SARS-CoV-2 IgG seroprevalence in blood donors located in three different federal states, Germany, March to June 2020. *Eurosurveillance* [Internet]. 2020 Jul 16 [cited 2020 Nov 12];25(28). Available from: <https://www.eurosurveillance.org/content/10.2807/1560-7917.ES.2020.25.28.2001285>
49. Weis S, Scherag A, Baier M, Kiehntopf M, Kamradt T, Kolanos S, et al. Seroprevalence of SARS-CoV-2 antibodies in an entirely PCR- sampled and quarantined community after a COVID-19 outbreak - the CoNAN study [Internet]. p. 21. Available from: <https://doi.org/10.1101/2020.07.15.20154112>
50. Reisinger EC, von Possel R, Warnke P, Geerdes-Fenge HF, Hemmer CJ, Pfefferle S, et al. [Screening of Mothers in a COVID-19 Low-Prevalence Region: Determination of SARS-CoV-2 Antibodies in 401 Mothers from Rostock by ELISA and Confirmation by Immunofluorescence]. *Dtsch Med Wochenschr* 1946. 2020 Jun 22;
51. Streeck H, Schulte B, Kuemmerer B, Richter E, Hoeller T, Fuhrmann C, et al. Infection fatality rate of SARS-CoV-2 infection in a German community with a super-spreading event. *medRxiv.* 2020 May 8;2020.05.04.20090076.
52. Bogogiannidou Z, Vontas A, Dadouli K, Kyritsi MA, Soteriades S, Nikoulis DJ, et al. Repeated leftover serosurvey of SARS-CoV-2 IgG antibodies, Greece, March and April 2020. *Eurosurveillance.* 2020 Aug 6;25(31):2001369.
53. Derval Igoe, Janice Bailie, Fiona O’Callaghan, Aoife Colgan, Jeff Connell, Paul Crowley, et al. Preliminary report of the results of the Study to Investigate COVID-19 Infection in People Living in Ireland (SCOPI): A national seroprevalence study, June-July 2020 [Internet]. Health Protection Surveillance Centre; 2020 Aug p. 9. Available from: <https://www.hpsc.ie/a-z/respiratory/coronavirus/novelcoronavirus/scopi/SCOPI%20report%20preliminary%20results%20final%20version.pdf>
54. Ido Efrati. Up to 270,000 Israelis Had Coronavirus, New Study Concludes [Internet]. *Haaretz.* 2020. Available from: <https://www.haaretz.com/israel-news/.premium-up-to-270-000-israelis-had-coronavirus-new-study-concludes-1.8888435>
55. Michael Bachner. Initial antibody tests indicate 200,000 Israelis have had COVID-19 – report [Internet]. *The Times of Israel.* 2020. Available from: <https://www.timesofisrael.com/initial-antibody-tests-indicate-200000-israelis-have-had-covid-19-report/>
56. Gabriele Pagani, Federico Conti, Andrea Giacomelli, Dario Bernacchia, Rossana Rondanin, Andrea Prina, et al. Seroprevalence of SARS-CoV-2 IgG significantly varies with age: results from a mass 7 population screening (SARS-2-SCREEN-CdA) [Internet]. 2020 Jun. Available from: <https://www.medrxiv.org/content/10.1101/2020.06.24.20138875v1.full.pdf>
57. Angelo Amante. Over half of people tested in Italy’s Bergamo have COVID-19 antibodies [Internet]. *The Jakarta Post.* 2020. Available from: <https://www.thejakartapost.com/news/2020/06/09/over-half-of-people-tested-in-italys-bergamo-have-covid-19-antibodies.html>
58. Fiore JR, Centra M, De Carlo A, Granato T, Rosa A, Sarno M, et al. Results from a survey in healthy blood donors in South Eastern Italy indicate that we are far away from herd immunity to SARS-CoV-2. *J Med Virol.* 2020 Aug 26;jmv.26425.
59. Armando Di Landro. Test sierologici Bergamo, arrivano i risultati di Nembro e Alzano: 61% di positivi [Internet]. *Corriere della Sera.* 2020. Available from: [https://bergamo.corriere.it/notizie/cronaca/20\\_aprile\\_30/coronavirus-bergamo-primi-risultati-test-61percento-positivi-85e8e36c-8a6b-11ea-94d3-9879860c12b6.shtml](https://bergamo.corriere.it/notizie/cronaca/20_aprile_30/coronavirus-bergamo-primi-risultati-test-61percento-positivi-85e8e36c-8a6b-11ea-94d3-9879860c12b6.shtml)
60. Valenti L. SARS-CoV-2 seroprevalence trends in healthy blood donors during the COVID-19 Milan outbreak. Pre-Print.
61. Percivalle E, Cambiè G, Cassaniti I, Nepita EV, Maserati R, Ferrari A, et al. Prevalence of SARS-CoV-2 specific neutralising antibodies in blood donors from the Lodi Red Zone in Lombardy, Italy, as at 06 April 2020. *Eurosurveillance* [Internet]. 2020 Jun 18 [cited 2020 Nov 12];25(24). Available from: <https://www.eurosurveillance.org/content/10.2807/1560-7917.ES.2020.25.24.2001031>
62. Milani GP, Montomoli E, Bollati V, Albetti B, Bandi C, Bellini T, et al. SARS-CoV-2 infection among asymptomatic homebound subjects in Milan, Italy. *Eur J Intern Med.* 2020 Aug;78:161–3.
63. Nawa N, Kuramochi J, Sonoda S, Yamaoka Y, Nukui Y, Miyazaki Y, et al. Seroprevalence of SARS-CoV-2 IgG Antibodies in Utsunomiya City, Greater Tokyo, after first pandemic in 2020 (U-CORONA): a household- and population-based study. *medRxiv.* 2020 Jul 26;2020.07.20.20155945.
64. Takita M, Matsumura T, Yamamoto K, Yamashita E, Hosoda K, Hamaki T, et al. Regional Difference in Seroprevalence of SARS-CoV-2 in Tokyo: Results from the community point-of-care antibody testing [Internet]. *Infectious Diseases (except HIV/AIDS);* 2020 Jun [cited 2020 Nov 12]. Available from: <http://medrxiv.org/lookup/doi/10.1101/2020.06.03.20121020>
65. Takita M, Matsumura T, Yamamoto K, Yamashita E, Hosoda K, Hamaki T, et al. Geographical Profiles of COVID-19 Outbreak in Tokyo: An Analysis of the Primary Care Clinic–Based Point-of-Care Antibody Testing. *J Prim Care Community Health.* 2020 Jan;11:215013272094269.
66. Snoeck C. Prevalence of SARS-CoV-2 infection in the Luxembourgish population: the CON-VINCE study. Pre-Print.

67. Slot E, Hogema BM, Reusken CBEM, Reimerink JH, Molier M, Karregat JHM, et al. Herd immunity is not a realistic exit strategy during a COVID-19 outbreak [Internet]. In Review; 2020 Apr [cited 2020 Nov 12]. Available from: <https://www.researchsquare.com/article/rs-25862/v1>
68. Gro Tunheim, Anne-Marte Bakken Kran, Gunnar Rø, Anneke Steens, Olav Hungnes, Fridtjof Lund-Johansen, et al. Seroprevalence of SARS-CoV-2 in the Norwegian population measured in residual sera collected in April/May 2020 and August 2019 [Internet]. Norwegian Institute of Public Health; 2020 Jun p. 13. Available from: [https://www.fhi.no/globalassets/dokumenterfiler/rapporter/2020/covid-19/seroprevalence-of-sars-cov-2-in-the-norwegian-population\\_report-26-06-2020.pdf](https://www.fhi.no/globalassets/dokumenterfiler/rapporter/2020/covid-19/seroprevalence-of-sars-cov-2-in-the-norwegian-population_report-26-06-2020.pdf)
69. Ana Paula Rodrigues. Resultados preliminares do primeiro Inquérito Serológico Nacional COVID-19 – Relatório [Internet]. Serviço Nacional de Saúde; 2020 Jul. Available from: <http://www.insa.min-saude.pt/resultados-preliminares-do-primeiro-inquerito-serologico-nacional-covid-19-relatorio/>
70. Yang Ji-ho. Few Koreans Test Positive for Coronavirus Antibodies [Internet]. Chosunlibo. 2020. Available from: [http://english.chosun.com/site/data/html\\_dir/2020/07/10/2020071001864.html](http://english.chosun.com/site/data/html_dir/2020/07/10/2020071001864.html)
71. Ock Hyun-ju. 0.03% of Koreans developed coronavirus antibodies: KCDC [Internet]. The Korea Herald. 2020. Available from: <http://www.koreaherald.com/view.php?ud=20200709000787>
72. Noh JY, Seo YB, Yoon JG, Seong H, Hyun H, Lee J, et al. Seroprevalence of Anti-SARS-CoV-2 Antibodies among Outpatients in Southwestern Seoul, Korea. *J Korean Med Sci* [Internet]. 2020 Jul 27 [cited 2020 Oct 4];35(33). Available from: <https://doi.org/10.3346/jkms.2020.35.e311>
73. Kurohi R, Lai L. Coronavirus: Community transmission in S'pore very low, but so is herd immunity, NCID says. *The Straits Times* [Internet]. 2020 Apr 29; Available from: <https://www.straitstimes.com/singapore/health/coronavirus-community-transmission-in-spore-very-low-but-so-is-herd-immunity-says>
74. FLORES D. Coronavirus | Los test serológicos de Torrejón de Ardoz arrojan un 20,18 % de personas con anticuerpos de coronavirus [Internet]. RTVE.es. 2020 [cited 2020 Oct 7]. Available from: <https://www.rtve.es/noticias/20200617/test-serologicos-torrejón-ardož-arrojan-2018-habitantes-tiene-anticuerpos-coronavirus/2018787.shtml>
75. Pollán M, Pérez-Gómez B, Pastor-Barriuso R, Oteo J, Hernán MA, Pérez-Olmeda M, et al. Prevalence of SARS-CoV-2 in Spain (ENE-COVID): a nationwide, population-based seroepidemiological study. *The Lancet*. 2020 Jul;S0140673620314835.
76. The Local SE. 14% of coronavirus antibody tests positive in Sweden in July [Internet]. The Local SE. 2020. Available from: <https://www.thelocal.se/20200723/14-of-antibody-tests-positive-in-sweden>
77. Stockholm Region. 16 juli: Lägesrapport om arbetet med det nya coronaviruset [Internet]. Stockholm Region. 2020. Available from: <https://www.sll.se/verksamhet/halsa-och-varld/nyheter-halsa-och-varld/2020/07/16-juli-lagesrapport-om-arbetet-med-det-nya-coronaviruset/>
78. Lundkvist Å, Hanson S, Olsen B. Pronounced difference in Covid-19 antibody prevalence indicates cluster transmission in Stockholm, Sweden. *Infect Ecol Epidemiol*. 2020 Jan 1;10(1):1806505.
79. Swedish Public Health Agency. Påvisning av antikroppar efter genomgången covid-19 hos blodgivare (Delrapport 2) [Internet]. Swedish Public Health Agency; 2020 Jun. Available from: <https://www.folkhalsomyndigheten.se/contentassets/376f9021a4c84da08de18ac597284f0c/pavisning-antikroppar-genomgangen-covid-19-blodgivare-delrapport-2.pdf>
80. Niclas Roxhed, Hong M-G, Bendes A, Matilda Dale, Mattsson C, Dodig-Crnkovic T, et al. A translational multiplex serology approach to profile the prevalence of anti-SARS-CoV-2 antibodies in home-sampled blood | medRxiv [Internet]. July 2 [cited 2020 Jul 6]. Available from: <https://www.medrxiv.org/content/10.1101/2020.07.01.20143966v1>
81. Fenwick C, Croxatto A, Coste AT, Pojer F, Andre C, Pellaton C, et al. Changes in SARS-CoV-2 Antibody Responses Impact the Estimates of Infections in Population-Based Seroprevalence Studies [Internet]. *Infectious Diseases (except HIV/AIDS)*; 2020 Jul [cited 2020 Nov 12]. Available from: <http://medrxiv.org/lookup/doi/10.1101/2020.07.14.20153536>
82. Stringhini S, Wisniak A, Piumatti G, Azman AS, Lauer SA, Baysson H, et al. Seroprevalence of anti-SARS-CoV-2 IgG antibodies in Geneva, Switzerland (SEROCoV-POP): a population-based study. *The Lancet* [Internet]. 2020 Jun 11 [cited 2020 Jun 12];0(0). Available from: [https://www.thelancet.com/journals/lancet/article/PIIS0140-6736\(20\)31304-0/abstract](https://www.thelancet.com/journals/lancet/article/PIIS0140-6736(20)31304-0/abstract)
83. Public Health England. National COVID-19 surveillance report: 28 August 2020 (week 35) [Internet]. Public Health England; p. 33–5. (Weekly Coronavirus Disease 2019 (COVID-19) Surveillance Report Summary of COVID-19 surveillance systems). Available from: [https://assets.publishing.service.gov.uk/government/uploads/system/uploads/attachment\\_data/file/912973/Weekly\\_COVID19\\_Surveillance\\_Report\\_week\\_35\\_FINAL.PDF](https://assets.publishing.service.gov.uk/government/uploads/system/uploads/attachment_data/file/912973/Weekly_COVID19_Surveillance_Report_week_35_FINAL.PDF)
84. Andrew McAuley, Elizabeth Dickson, Norah Palmateer, Josie Murray, Craig Waugh, Lesley Wallace, et al. Enhanced Surveillance of COVID-19 in Scotland Population-based seroprevalence surveillance [Internet]. Public Health

- Scotland; September 30. Available from: <https://beta.isdscotland.org/find-publications-and-data/population-health/covid-19/enhanced-surveillance-of-covid-19-in-scotland/>
85. Public Health England. National COVID-19 surveillance report: 21 August 2020 (week 34) [Internet]. Public Health England; 2020 Aug p. 31–4. (Weekly Coronavirus Disease 2019 (COVID-19) Surveillance Report Summary of COVID-19 surveillance systems). Available from: [https://assets.publishing.service.gov.uk/government/uploads/system/uploads/attachment\\_data/file/911002/Weekly\\_COVID19\\_Surveillance\\_Report\\_week\\_34\\_FINAL.pdf](https://assets.publishing.service.gov.uk/government/uploads/system/uploads/attachment_data/file/911002/Weekly_COVID19_Surveillance_Report_week_34_FINAL.pdf)
  86. Emily Connors, Eleanor Fordham. Coronavirus (COVID-19) Infection Survey pilot: England and Wales, 14 August 2020 [Internet]. Office for National Statistics; 2020 Aug. (Coronavirus (COVID-19) Infection Survey pilot). Available from: <https://www.ons.gov.uk/peoplepopulationandcommunity/healthandsocialcare/conditionsanddiseases/bulletins/coronaviruscovid19infectionsurveyspilot/englandandwales14august2020>
  87. Ward H, Atchison C, Whitaker M, Ainslie KE, Elliott J, Okell L. Antibody prevalence for SARS-CoV-2 following the peak of the pandemic in England: REACT2 study in 100,000 adults [Internet]. p. 21. Available from: <https://www.medrxiv.org/content/10.1101/2020.08.12.20173690v2.full.pdf>
  88. Emily Connors, Philippa Haughton. Coronavirus (COVID-19) Infection Survey pilot: England, 17 July 2020 [Internet]. Office for National Statistics; 2020 Jul p. 21. (Coronavirus (COVID-19) Infection Survey pilot). Available from: <https://www.ons.gov.uk/peoplepopulationandcommunity/healthandsocialcare/conditionsanddiseases/bulletins/coronaviruscovid19infectionsurveyspilot/england17july2020>
  89. Public Health England. National COVID-19 surveillance report: 7 August 2020 (week 32) [Internet]. Public Health England; 2020 Aug. (Weekly Coronavirus Disease 2019 (COVID-19) Surveillance Report Summary of COVID-19 surveillance systems). Available from: [https://assets.publishing.service.gov.uk/government/uploads/system/uploads/attachment\\_data/file/907954/Weekly\\_COVID19\\_Surveillance\\_Report\\_week\\_32\\_2.pdf](https://assets.publishing.service.gov.uk/government/uploads/system/uploads/attachment_data/file/907954/Weekly_COVID19_Surveillance_Report_week_32_2.pdf)
  90. Wells PM, Doores KM, Couvreur S, Martin Martinez R, Seow J, Graham C, et al. Estimates of the rate of infection and asymptomatic COVID-19 disease in a population sample from SE England. medRxiv. 2020 Jan 1;2020.07.29.20162701.
  91. Statistics Jersey. SARS-CoV-2: Prevalence of antibodies in Jersey Community survey – round 2 [Internet]. Statistics Jersey; 2020 Jun. Available from: <https://www.gov.je/SiteCollectionDocuments/Government%20and%20administration/R%20Prevalence%20of%20antibodies%2020200609%20SJ.pdf>
  92. Thompson CP, Grayson N, Paton R, Bolton JS, Lourenço J, Penman B, et al. Detection of neutralising antibodies to SARS coronavirus 2 to determine population exposure in Scottish blood donors between March and May 2020 [Internet]. Infectious Diseases (except HIV/AIDS); 2020 Apr [cited 2020 Aug 10]. Available from: <http://medrxiv.org/lookup/doi/10.1101/2020.04.13.20060467>
  93. ABC7.com staff. Riverside County may have more than 100,000 COVID-19 cases, antibody study suggests [Internet]. ABC News. 2020. Available from: <https://abc7.com/health/riverside-county-may-have-100000-covid-19-cases-study-says/6337677/>
  94. Nicole Hayden, Amaray D. Alvarez. Antibody tests suggest Riverside County’s COVID case tally may be 431% higher than counted [Internet]. Desert Sun. July 27. Available from: <https://www.desertsun.com/story/news/health/2020/07/27/riverside-county-estimates-175-000-residents-could-have-been-infected/5522612002/>
  95. Rob McMillan. 6 percent of Riverside County residents had COVID-19, according to antibody study [Internet]. ABC News. 2020. Available from: <https://abc7.com/riverside-county-covid-update-coronavirus-ie-covid-19/6340600/>
  96. Julie Zauzmer. D.C. has tested 13,706 blood samples. Only 809 carried coronavirus antibodies. [Internet]. The Washington Post. 2020. Available from: <https://www.washingtonpost.com/dc-md-va/2020/07/15/dc-health-lab-has-tested-13706-blood-samples-only-809-people-carried-coronavirus-antibodies/>
  97. Cat Viglienzoni. Early results of UVM research tracking COVID’s spread in Vermont [Internet]. WCAX3. 2020. Available from: <https://www.wcax.com/2020/07/17/early-results-of-uvm-research-tracking-covids-spread-in-vermont/>
  98. Mahajan S, Srinivasan R, Redlich CA, Huston SK, Anastasio KM, Cashman L, et al. Seroprevalence of SARS-CoV-2-Specific IgG Antibodies Among Adults Living in Connecticut Between March 1 and June 1, 2020: Post-Infection Prevalence (PIP) Study. medRxiv. 2020 Aug 6;2020.08.04.20168203.
  99. Spectrum News Staff. Study Finds Rate of Exposure to COVID-19 in Louisville Higher Than Expected [Internet]. Spectrum News 1. 2020. Available from: <https://spectrumnews1.com/ky/louisville/news/2020/07/23/uofl-coimmunity-project-phase-2-results>

100. Sutton M, Cieslak P, Linder M. Notes from the Field: Seroprevalence Estimates of SARS-CoV-2 Infection in Convenience Sample — Oregon, May 11–June 15, 2020. *MMWR Morb Mortal Wkly Rep.* 2020 Aug 14;69(32):1100–1.
101. Mary Hynes. Nevada COVID-19 infection rate 5 times higher, antibody tests show [Internet]. *Las Vegas Review Journal.* 2020. Available from: <https://www.reviewjournal.com/local/local-nevada/nevada-covid-19-infection-rate-5-times-higher-antibody-tests-show-2070094/>
102. Kari Harden. One new positive COVID-19 case in Routt County, antibody testing ramping up [Internet]. *Steamboat Pilot & Today.* 2020. Available from: <https://www.steamboatpilot.com/news/one-new-positive-covid-19-case-in-routt-county-antibody-testing-ramping-up/>
103. Shari Rudavsky. Fairbanks study indicates that ‘virus has slowed its spread’ in Indiana [Internet]. *Indy Star.* June 17. Available from: <https://www.indystar.com/story/news/health/2020/06/17/indiana-coronavirus-fairbanks-study-indicates-spread-has-slowed/3208509001/>
104. Steve Ohnesorge. Antibody testing continues in Burke County [Internet]. *WBTV.* 2020. Available from: <https://www.wbtv.com/2020/05/29/antibody-testing-continues-burke-county/>
105. Nicole Hayden. Coachella Valley far from COVID-19 herd immunity, preliminary antibody test results show [Internet]. *Desert Sun.* 2020. Available from: [https://www.google.com/url?rct=j&sa=t&url=https://www.desertsun.com/story/news/health/2020/05/29/coachella-valley-far-covid-19-herd-immunity-preliminary-antibody-tests-show/5280021002/&ct=ga&cd=CAAYKzIaOTBkZWE5ODk5NGU5MTg1OTpjb206ZW46VVM&usg=AFQjCNFQxOqwjTX2Kz2\\_mnj1RV7Upa8rEg](https://www.google.com/url?rct=j&sa=t&url=https://www.desertsun.com/story/news/health/2020/05/29/coachella-valley-far-covid-19-herd-immunity-preliminary-antibody-tests-show/5280021002/&ct=ga&cd=CAAYKzIaOTBkZWE5ODk5NGU5MTg1OTpjb206ZW46VVM&usg=AFQjCNFQxOqwjTX2Kz2_mnj1RV7Upa8rEg)
106. Shomik Mukherjee. 1% of early Humboldt County coronavirus tests show antibodies [Internet]. *Times Standard.* 2020. Available from: <https://www.times-standard.com/2020/06/02/1-of-early-humboldt-county-coronavirus-tests-show-antibodies/>
107. Michelle Alfini. Antibody tests for coronavirus so far trend overwhelmingly negative [Internet]. *WKOW.* 2020. Available from: <https://wkow.com/2020/05/20/antibody-tests-for-coronavirus-so-far-trend-overwhelmingly-negative/>
108. McLaughlin C, Doll MK, Morrison KT, McLaughlin WL, OConnor T, Sholukh AM, et al. High Community SARS-CoV-2 Antibody Seroprevalence in a Ski Resort Community, Blaine County, Idaho, US. Preliminary Results. *medRxiv* [Internet]. 2020 Jul 21 [cited 2020 Nov 12]; Available from: <http://medrxiv.org/lookup/doi/10.1101/2020.07.19.20157198>
109. Feehan AK, Fort D, Garcia-Diaz J, Price-Haywood EG, Velasco C, Sapp E, et al. Seroprevalence of SARS-CoV-2 and Infection Fatality Ratio, Orleans and Jefferson Parishes, Louisiana, USA, May 2020. *Emerg Infect Dis.* 2020 Nov;26(11):2765–8.
110. City of Boston. RESULTS RELEASED FOR ANTIBODY AND COVID-19 TESTING OF BOSTON RESIDENTS [Internet]. City of Boston. 2020. Available from: <https://www.boston.gov/news/results-released-antibody-and-covid-19-testing-boston-residents>
111. Adam Gaffin. One out of ten Bostonians has been exposed to coronavirus, according to initial testing of people in four Zip codes [Internet]. *Universal Hub.* 2020. Available from: <https://www.universalhub.com/2020/initial-antibody-testing-four-zip-codes-shows-one>
112. Sood N, Simon P, Ebner P, Eichner D, Reynolds J, Bendavid E, et al. Seroprevalence of SARS-CoV-2–Specific Antibodies Among Adults in Los Angeles County, California, on April 10–11, 2020. *J Am Med Assoc* [Internet]. 2020 May 18 [cited 2020 May 18]; Published Online. Available from: <https://jamanetwork.com/journals/jama/fullarticle/2766367>
113. Havers FP, Reed C, Lim T, Montgomery JM, Klena JD, Hall AJ, et al. Seroprevalence of Antibodies to SARS-CoV-2 in 10 Sites in the United States, March 23–May 12, 2020. *JAMA Intern Med* [Internet]. 2020 Jul 21 [cited 2020 Jul 29]; Available from: <https://jamanetwork.com/journals/jamainternalmedicine/fullarticle/2768834>
114. CBS Los Angeles. LA County ‘Still Far Away From Herd Immunity,’ New Antibody Numbers Show [Internet]. *CBS Los Angeles.* 2020. Available from: <https://losangeles.cbslocal.com/2020/05/20/la-county-still-far-away-from-herd-immunity-new-antibody-numbers-show/>
115. Nesbitt DJ, Jin D, Hogan JW, Chan PA, Simon MJ, Vargas M, et al. Low Seroprevalence of SARS-CoV-2 in Rhode Island Blood Donors Determined using Multiple Serological Assay Formats. *medRxiv.* 2020 Jan 1;2020.07.20.20157743.
116. Biggs HM, Harris JB, Breakwell L, Dahlgren FS, Abedi GR, Szablewski CM, et al. Estimated Community Seroprevalence of SARS-CoV-2 Antibodies — Two Georgia Counties, April 28–May 3, 2020. *MMWR Morb Mortal Wkly Rep.* 2020 Jul 24;69(29):965–70.
117. Menachemi N, Yiannoutsos CT, Dixon BE, Duszynski TJ, Fadel WF, Wools-Kaloustian KK, et al. Population Point Prevalence of SARS-CoV-2 Infection Based on a Statewide Random Sample — Indiana, April 25–29, 2020. *MMWR Morb Mortal Wkly Rep.* 2020 Jul 24;69(29):960–4.
118. Aaron E. Carroll. Too Many States Are Flying Blind Into Reopening. Not Indiana. [Internet]. *The New York Times.* 2020. Available from: <https://www.nytimes.com/2020/05/13/opinion/indiana-reopening-coronavirus-testing.html>

119. Dariush Shafa. Study projects only 9% of COVID-19 cases detected [Internet]. Perry County News. 2020. Available from: <https://www.perrycountynews.com/content/study-projects-only-9-covid-19-cases-detected>
120. Chamie G, Marquez C, Crawford E, Peng J, Petersen M, Schwab D, et al. Community Transmission of Severe Acute Respiratory Syndrome Coronavirus 2 Disproportionately Affects the Latinx Population During Shelter-in-Place in San Francisco. *Clin Infect Dis* [Internet]. [cited 2020 Oct 27]; Available from: <https://academic.oup.com/cid/advance-article/doi/10.1093/cid/ciaa1234/5895337>
121. Rosenberg ES, Tesoriero JM, Rosenthal EM, Chung R, Barranco MA, Styer LM, et al. Cumulative incidence and diagnosis of SARS-CoV-2 infection in New York. *Ann Epidemiol*. 2020 Aug;48:23-29.e4.
122. Zou J, Bretin A, Gewirtz A. Antibodies to SARS/CoV-2 in arbitrarily-selected Atlanta residents. *medRxiv*. 2020 May 6;2020.05.01.20087478.
123. Bryan A, Pepper G, Wener MH, Fink SL, Morishima C, Chaudhary A, et al. Performance Characteristics of the Abbott Architect SARS-CoV-2 IgG Assay and Seroprevalence Testing in Idaho. *medRxiv*. 2020 May 2;2020.04.27.20082362.
124. Alessandro Sassoon. OMNI Healthcare's COVID-19 antibody testing data for Brevard shows low rates of immunity [Internet]. Florida Today. 2020. Available from: <https://www.floridatoday.com/story/news/2020/04/24/omni-covid-19-immunity-testing-data-brevard-county-florida-antibody/3022571001/>
125. Jim Waymer. Fresh from controversy, OMNI announces COVID-19 immunity testing [Internet]. Florida Today. 2020. Available from: <https://www.floridatoday.com/story/news/2020/04/17/omni-healthcare-announces-coronavirus-immunity-testing/5147092002/>
126. Dingens AS, Crawford KH, Adler A, Steele SL, Lacombe K, Eguia R, et al. Serological identification of SARS-CoV-2 infections among children visiting a hospital during the initial Seattle outbreak. *medRxiv*. 2020 Jun 30;2020.05.26.20114124.
127. Appa A, Takahashi S, Rodriguez-Barraquer I, Chamie G, Sawyer A, Consortium C, et al. Universal PCR and antibody testing demonstrate little to no transmission of SARS-CoV-2 in a rural community. *medRxiv*. 2020 Aug 17;2020.08.15.20175786.
128. Blake Paterson. Takeaways from coronavirus antibody tests: Infections might be more widespread than cases suggest [Internet]. The Advocate. 2020. Available from: [https://www.theadvocate.com/baton\\_rouge/news/coronavirus/article\\_b499efa0-8983-11ea-a3f1-af936ecb1d2c.html](https://www.theadvocate.com/baton_rouge/news/coronavirus/article_b499efa0-8983-11ea-a3f1-af936ecb1d2c.html)
129. Stadlbauer D, Tan J, Jiang K, Hernandez M, Fabre S, Amanat F, et al. Seroconversion of a city: Longitudinal monitoring of SARS-CoV-2 seroprevalence in New York City. *medRxiv* [Internet]. 2020 Jun 29 [cited 2020 Nov 12]; Available from: <http://medrxiv.org/lookup/doi/10.1101/2020.06.28.20142190>
130. Bendavid E, Mulaney B, Sood N, Shah S, Ling E, Bromley-Dulfano R, et al. COVID-19 Antibody Seroprevalence in Santa Clara County, California. *medRxiv* [Internet]. 2020 Apr 17 [cited 2020 Apr 22]; Available from: <https://www.medrxiv.org/content/10.1101/2020.04.14.20062463v1>
131. Anne Schuchat. Public Health Response to the Initiation and Spread of Pandemic COVID-19 in the United States, February 24–April 21, 2020 [Internet]. US Department of Health and Human Services/Centers for Disease Control and Prevention; 2020 May. (Morbidity and Mortality Weekly Report). Available from: <https://www.cdc.gov/mmwr/volumes/69/wr/pdfs/mm6918e2-H.pdf>
132. Menezes AMB, Victora CG, Hartwig FP, Silveira MF, Horta BL, Barros AJD, et al. High prevalence of symptoms among Brazilian subjects with antibodies against SARS-CoV-2: a nationwide household survey. *medRxiv*. 2020 Aug 12;2020.08.10.20171942.
133. Universidade Federal de Pelotas. EPICOVID19-BR divulga novos resultados sobre o coronavírus no Brasil [Internet]. Universidade Federal de Pelotas; 2020 Jul. Available from: <https://bit.ly/Epicovid19BRfases1-3>
134. Vieira MA da C e S, Vieira CP de B, Borba A de S, Melo MC de C, Oliveira M de S, Melo RM, et al. Sequential serological surveys in the early stages of the coronavirus disease epidemic: limitations and perspectives. *Rev Soc Bras Med Trop*. 2020;53:e20200351.
135. Hallal P, Hartwig F, Horta B, Victora GD, Silveira M, Struchiner C, et al. Remarkable variability in SARS-CoV-2 antibodies across Brazilian regions: nationwide serological household survey in 27 states. *medRxiv* [Internet]. 2020 May 30 [cited 2020 Jun 1]; Available from: <https://www.medrxiv.org/content/10.1101/2020.05.30.20117531v1>
136. Costa Gomes C, Cerutti Jr. C, Zandonade E, Noia Maciel EL, Carvalho de Alencar FE, Almada GL, et al. A population-based study of the prevalence of COVID-19 infection in Espírito Santo, Brazil: methodology and results of the first stage. *medRxiv* [Internet]. 2020 Jun 16 [cited 2020 Jun 16]; Available from: <https://www.medrxiv.org/content/10.1101/2020.06.13.20130559v1>
137. Tess BH, Granato CFH, Alves MCGP, Pintao MC, Rizzatti E, Nunes MC, et al. SARS-CoV-2 seroprevalence in the municipality of Sao Paulo, Brazil, ten weeks after the first reported case. *medRxiv* [Internet]. 2020 Jun 29 [cited 2020 Nov 12]; Available from: <http://medrxiv.org/lookup/doi/10.1101/2020.06.29.20142331>
138. Phillippe Watanabe. Nos bairros de SP mais afetados pela Covid-19, só 5% tiveram contato com o vírus [Internet]. Folha De S. Paulo. 2020. Available from: <https://www1.folha.uol.com.br/eqilibrioesaude/2020/05/nos-bairros-de-sp-mais-afetados-pela-covid-19-so-5-tiveram-contato-com-o-virus.shtml>

139. Silveira M, Barros A, Horta B, Pellanda L, Victora G, Dellagostin O, et al. Repeated population-based surveys of antibodies against SARS-CoV-2 in Southern Brazil. medRxiv. 2020 May 10;2020.05.01.20087205.
140. Filho LA, Szwarcwald CL. Seroprevalence of anti-SARS-CoV-2 among blood donors in Rio de Janeiro, Brazil. :10.
141. Del Brutto OH, Costa AF, Mera RM, Recalde BY, Bustos JA, García HH. SARS-CoV-2 in Rural Latin America. A Population-based Study in Coastal Ecuador. Clin Infect Dis [Internet]. [cited 2020 Oct 15]; Available from: <https://academic.oup.com/cid/advance-article/doi/10.1093/cid/ciaa1055/5876901>
142. Del Brutto OH, Mera RM, Recalde BY, Costa AF. Social Determinants of Health and Risk of SARS-CoV-2 Infection in Community-Dwelling Older Adults Living in a Rural Latin American Setting. J Community Health [Internet]. 2020 Jul 15 [cited 2020 Nov 12]; Available from: <http://link.springer.com/10.1007/s10900-020-00887-9>
143. Ministerio de Salud. Estudio de prevalencia determina que el 25,3% de la población de Lima y Callao estaría infectada de Covid-19 [Internet]. Ministerio de Salud. 2020. Available from: <https://www.gob.pe/institucion/minsa/noticias/216013-estudio-de-prevalencia-determina-que-el-25-3-de-la-poblacion-de-lima-y-callao-estaria-infectada-de-covid-19>
144. Peruvian Government. Estudio de prevalencia determina que el 25.3% de la población de lima y Callao adquirió la infección por SARS-COV2 [Internet]. Peruvian Government; 2020 Jul. Available from: [https://twitter.com/DGE\\_MINSA/status/1287768430960168961](https://twitter.com/DGE_MINSA/status/1287768430960168961)
145. Peruvian Government. Minsa divulga ficha técnica del estudio que revela que el 25.3% de Lima y Callao adquirió el COVID-19 [Internet]. Gestion. 2020. Available from: <https://gestion.pe/peru/coronavirus-peru-minsa-divulga-ficha-tecnica-del-estudio-que-revela-que-el-253-de-lima-y-callao-adquirio-el-covid-19-cuarentena-estado-de-emergencia-nndc-noticia/>
146. Shakiba M, Nazari SSH, Mehrabian F, Rezvani SM, Ghasempour Z, Heidarzadeh A. Seroprevalence of COVID-19 virus infection in Guilan province, Iran. medRxiv. 2020 May 1;2020.04.26.20079244.
147. Sughayer MA, Mansour A, Al Nuirat A, Souan L, Ghanem M, Siag M. Covid-19 Seroprevalence rate in healthy blood donors from a community under strict lockdown measures. medRxiv [Internet]. 2020 Jun 7 [cited 2020 Jun 7]; Available from: <https://www.medrxiv.org/content/10.1101/2020.06.06.20123919v1.full.pdf+html>
148. Aneesha Bedi. 28.3% of Delhi's population now exposed to Covid, shows second sero survey, up from 23.4% [Internet]. The Print. 2020. Available from: <https://theprint.in/health/28-3-of-delhis-population-now-exposed-to-covid-shows-second-sero-survey-up-from-23-4/484455/>
149. Yusra Husain. 4% 'healthy' blood donors in Lucknow found with Covid antibodies [Internet]. The Times of India. 2020. Available from: <https://timesofindia.indiatimes.com/city/lucknow/4-healthy-blood-donors-in-city-found-with-covid-antibodies/articleshow/77044828.cms>
150. India.com News Desk. COVID-19: People From Bhiwandi, Anand Vihar Have Antibodies Against Corona? Check Report [Internet]. India.com. 2020. Available from: <https://www.india.com/news/india/covid-19-people-from-bhiwandi-anand-vihar-have-antibodies-against-corona-check-report-4092355/>
151. HT Correspondent. 15 per cent population may have virus antibodies, says private lab data [Internet]. Hindustan Times. 2020. Available from: <https://www.hindustantimes.com/india-news/15-per-cent-population-may-have-virus-antibodies-says-private-lab-data/story-mUddlj9kxI4vRzYu4KMUil.html>
152. Suresh Kakani. SARS-Cov2 Sero-prevalence study in Mumbai: NITI-Aayong-BMC-TIFR study [Internet]. IDFC Institute; 2020 Jul. Available from: [https://www.idfcinstitute.org/site/assets/files/15834/sero\\_press\\_\\_28\\_07\\_2020.pdf](https://www.idfcinstitute.org/site/assets/files/15834/sero_press__28_07_2020.pdf)
153. Malani A, Shah D, Kang G, Lobo GN, Shastri J, Mohanan M, et al. Seroprevalence of SARS-CoV-2 in slums and non-slums of Mumbai, India, during June 29-July 19, 2020. medRxiv [Internet]. 2020 Sep 1 [cited 2020 Nov 12]; Available from: <http://medrxiv.org/lookup/doi/10.1101/2020.08.27.20182741>
154. Archana Mishra. Sero survey: 1,544 tested, 180 found with Covid-19 antibodies in Haryana [Internet]. Hindustan Times. 2020. Available from: <https://www.hindustantimes.com/gurugram/sero-survey-1-544-tested-180-found-with-covid-19-antibodies-in-haryana/story-k7DUZ8WH4jYqAzCsUmXkEJ.html>
155. Astha Saxena. New plan to check Covid spread in Delhi: Sero survey every month [Internet]. The Indian Express. 2020. Available from: <https://indianexpress.com/article/cities/delhi/delhi-coronavirus-latest-updates-sero-surveys-6518032/>
156. PIB Delhi. Sero-prevalence study conducted by National Center for Disease Control NCDC, MoHFW, in Delhi, June 2020 [Internet]. Indian Ministry of Health and Family Welfare; 2020 Jul. Available from: <https://pib.gov.in/PressReleaseIframePage.aspx?PRID=1640137>
157. Aswin Kumar. Initial trend: Positivity rate low in antibody testing [Internet]. The Times of India. 2020. Available from: <https://timesofindia.indiatimes.com/city/thiruvananthapuram/initial-trend-positivity-rate-low-in-antibody-testing/articleshow/76363847.cms>
158. Sumi Dutta. 15-30% people in containment areas exposed to COVID-19: ICMR's serosurvey [Internet]. The New Indian Express. 2020. Available from: <https://www.newindianexpress.com/nation/2020/jun/08/15-30-people-in-containment-areas-exposed-to-covid-19-icmrs-serosurvey-2153893.html>
159. Jacob Koshy. News Analysis | India may have undercounted cases [Internet]. The Hindu. 2020. Available from: <https://www.thehindu.com/news/national/news-analysis-india-may-have-undercounted-cases/article31822079.ece>

160. Rhythma Kaul. Over 24k samples collected for random antibody tests [Internet]. Hindustan Times. 2020. Available from: <https://www.hindustantimes.com/india-news/over-24k-samples-collected-for-random-antibody-tests/story-Pec8jZE03DMQ0zOQwr4KEN.html>
161. Swatee Kher. Six Maharashtra districts have higher Covid-19 prevalence than nation's finding [Internet]. The Times of India. 2020. Available from: <https://timesofindia.indiatimes.com/city/pune/6-maha-districts-have-higher-ncov-prevalence-than-nations-finding/articleshow/76500273.cms>
162. Younas A, Waheed S, Khawaja S, Imam M, Borhany M, Shamsi T. Seroprevalence of SARS-CoV-2 antibodies among healthy blood donors in Karachi, Pakistan. *Transfus Apher Sci*. 2020 Aug;102923.
163. Le Chang, Wangheng Hou, Lei Zhao, Yali Zhang, Yanbin Wang, Linfeng Wu, et al. The prevalence of antibodies to SARS-CoV-2 among blood donors in China. *medRxiv*. 2020 Jul 14;32.
164. Liu T, Wu S, Tao H, Zeng G, Fuling Zhou, Guo F, et al. Prevalence of IgG antibodies to SARS-CoV-2 in Wuhan – implications for the ability to produce long-lasting protective antibodies against SARS-CoV-2. *medRxiv* [Internet]. 2020 Jun 16; Available from: <https://www.medrxiv.org/content/10.1101/2020.06.13.20130252v1>
165. Ling R, Yu Y, He J, Zhang J, Xu S, Sun R, et al. Seroprevalence and epidemiological characteristics of immunoglobulin M and G antibodies against SARS-CoV-2 in asymptomatic people in Wuhan, China. *medRxiv*. 2020 Aug 25;28.
166. Xu R, Huang J, Duan C, Liao Q, Shan Z, Wang M, et al. Low prevalence of antibodies against SARS-CoV-2 among voluntary blood donors in Guangzhou, China. *J Med Virol* [Internet]. [cited 2020 Oct 27];n/a(n/a). Available from: <https://onlinelibrary.wiley.com/doi/abs/10.1002/jmv.26445>
167. To KK-W, Cheng VC-C, Cai J-P, Chan K-H, Chen L-L, Wong L-H, et al. Seroprevalence of SARS-CoV-2 in Hong Kong and in residents evacuated from Hubei province, China: a multicohort study. *Lancet Microbe*. 2020 Jul;1(3):e111–8.
168. Hallowell BD, Carlson CM, Jacobs JR, Pomeroy M, Steinberg J, Tenforde MW, et al. Severe Acute Respiratory Syndrome Coronavirus 2 Prevalence, Seroprevalence, and Exposure among Evacuees from Wuhan, China, 2020. *Emerg Infect Dis*. 2020 Sep;26(9):1998–2004.
169. Sam I-C, Chong YM, Tan C'W, Chan YF. Low postpandemic wave SARS-CoV-2 seroprevalence in Kuala Lumpur and Selangor, Malaysia. *J Med Virol* [Internet]. [cited 2020 Oct 2];n/a(n/a). Available from: <https://onlinelibrary.wiley.com/doi/abs/10.1002/jmv.26426>
170. Kempen JH, Abashawl A, Kinfemichael H, Nigussie Difabachew M, Menkir AA, Assefa MT, et al. SARS CoV-2 Serosurvey in Addis Ababa, Ethiopia. *medRxiv* [Internet]. 2020 Jun 23 [cited 2020 Jun 24]; Available from: <https://www.medrxiv.org/content/10.1101/2020.06.23.20137521v1>
171. Uyoga S, Adetifa IMO, Karanja HK, Nyagwange J, Tuju J, Wanjiku P, et al. Seroprevalence of anti-SARS-CoV-2 IgG antibodies in Kenyan blood donors. *medRxiv* [Internet]. 2020 Jul 29 [cited 2020 Aug 7]; Available from: <http://medrxiv.org/lookup/doi/10.1101/2020.07.27.20162693>
172. Majiya H, Aliyu-Paiko M, Balogu VT, Musa DA, Salihu IM, Kawu AA, et al. Seroprevalence of COVID-19 in Niger State. *medRxiv* [Internet]. 2020 Aug 5 [cited 2020 Nov 12]; Available from: <http://medrxiv.org/lookup/doi/10.1101/2020.08.04.20168112>
173. Anna Grigoryan. Antibodies found in Armenia's 61 medical workers from 380 examinations: testing continues [Internet]. Armen Press. 2020. Available from: <https://armenpress.am/eng/news/1020040/>
174. Tsaneva-Damyanova D. SARS-CoV-2: seroepidemiological pattern in northeastern Bulgaria. *Biotechnol Biotechnol Equip*. 2020 Jan 1;34(1):441–6.
175. Vilibic-Cavlek T, Stevanovic V, Tabain I, Betica-Radic L, Sabadi D, Peric L, et al. Severe acute respiratory syndrome coronavirus 2 seroprevalence among personnel in the healthcare facilities of Croatia, 2020. *Rev Soc Bras Med Trop* [Internet]. 2020 [cited 2020 Oct 17];53. Available from: [http://www.scielo.br/scielo.php?script=sci\\_abstract&pid=S0037-86822020000100914&lng=en&nrm=iso&tlng=en](http://www.scielo.br/scielo.php?script=sci_abstract&pid=S0037-86822020000100914&lng=en&nrm=iso&tlng=en)
176. Jerkovic I, Ljubic T, Basic Z, Kruzic I, Kunac N, Bezic J, et al. SARS-CoV-2 antibody seroprevalence in industry workers in Split-Dalmatia and Sibenik-Knin County, Croatia. *medRxiv*. 2020 May 15;2020.05.11.20095158.
177. Malickova K, Kratka Z, Luxova S, Bortlik M, Lukas M. Anti-SARS-CoV-2 antibody testing in IBD healthcare professionals: are we currently able to provide COVID-free IBD clinics? *Scand J Gastroenterol*. 2020 Jul 14;1–3.
178. MedLife. Concluzii preliminare, studiu MedLife: "Cel mai probabil populatia nu are imunitate dobandita natural pentru COVID 19. Respectarea masurilor de protectie si extinderea testarii reprezinta sansa noastra de a functiona in siguranta si de a reporni economia" [Internet]. MedLife. 2020. Available from: <https://www.medlife.ro/comunicat-de-presa/concluzii-preliminare-studiu-medlife-cel-mai-probabil-populatia-nu-are-imunitate-dobandita-natural-pentru-covid-19-respectarea-masurilor-de-protectie-si-extinderea-testarii-reprezinta-sansa-noastra-de-a-functiona-in-siguranta-si-de-a>
179. Figar S, Pagotto V, Luna L, Salto J, Wagner Manslau M, Mistchenko A, et al. Community-level SARS-CoV-2 Seroprevalence Survey in urban slum dwellers of Buenos Aires City, Argentina: a participatory research. *medRxiv* [Internet]. 2020 Jul 16 [cited 2020 Nov 13]; Available from: <http://medrxiv.org/lookup/doi/10.1101/2020.07.14.20153858>



180. Macartney K, Quinn HE, Pillsbury AJ, Koirala A, Deng L, Winkler N, et al. Transmission of SARS-CoV-2 in Australian educational settings: a prospective cohort study. *Lancet Child Adolesc Health*. 2020 Nov;4(11):807–16.
181. Hackner K, Errhalt P, Willheim M, Grasl M-A, Lagumdžija J, Riegler W, et al. Diagnostic accuracy of two commercially available rapid assays for detection of IgG and IgM antibodies to SARS-CoV-2 compared to ELISA in a low-prevalence population. *Res Sq [Internet]*. 2020 Aug 19 [cited 2020 Nov 13]; Available from: <https://www.researchsquare.com/article/rs-50887/v1>
182. Reiter T, Pajenda S, Wagner L, Gaggl M, Atamaniuk J, Holzer B, et al. Covid-19 serology in nephrology health care workers. *medRxiv*. 2020 Jan 1;2020.07.21.20136218.
183. Orth-Höller D, Eigentler A, Weseslindtner L, Möst J. Antibody kinetics in primary- and secondary-care physicians with mild to moderate SARS-CoV-2 infection. *Emerg Microbes Infect*. 2020 Jan 1;9(1):1692–4.
184. Blairon L, Mokrane S, Wilmet A, Dessilly G, Kabamba-Mukadi B, Beukinga I, et al. Large-scale, molecular and serological SARS-CoV-2 screening of healthcare workers in a 4-site public hospital in Belgium after COVID-19 outbreak. *J Infect*. 2020 Jul;S0163445320305144.
185. Berardis S, Verroken A, Vetillart A, Struyf C, Gilbert M, Gruson D, et al. SARS-CoV-2 seroprevalence in a Belgian cohort of patients with cystic fibrosis. *J Cyst Fibros*. 2020 Aug;S1569199320308213.
186. Martin C, Montesinos I, Dauby N, Gilles C, Dahma H, Van Den Wijngaert S, et al. Dynamics of SARS-CoV-2 RT-PCR positivity and seroprevalence among high-risk healthcare workers and hospital staff. *J Hosp Infect*. 2020 Sep;106(1):102–6.
187. Steensels D, Oris E, Coninx L, Nuyens D, Delforge M-L, Vermeersch P, et al. Hospital-Wide SARS-CoV-2 Antibody Screening in 3056 Staff in a Tertiary Center in Belgium. *JAMA*. 2020;(7501160).
188. Torres JP, Piñera C, De La Maza V, Lagomarcino AJ, Simian D, Torres B, et al. Severe Acute Respiratory Syndrome Coronavirus 2 Antibody Prevalence in Blood in a Large School Community Subject to a Coronavirus Disease 2019 Outbreak: A Cross-sectional Study. *Clin Infect Dis*. 2020 Jul 10;ciaa955.
189. Mesnil M, Joubel K, Yavchitz A, Miklaszewski N, Devys J-M. Seroprevalence of SARS-Cov-2 in 646 professionals at the Rothschild Foundation Hospital (ProSeCoV study). *Anaesth Crit Care Pain Med*. 2020 Oct;39(5):595–6.
190. Fumery M, Matias C, Brochot E. Seroconversion of Immunoglobulins to SARS-CoV2 in Patients With Inflammatory Bowel Disease Patients Treated by Biologics. *J Crohns Colitis*. 2020 Jul 22;jjaa154.
191. Solodky ML, Galvez C, Russias B, Detourbet P, N'Guyen-Bonin V, Herr A-L, et al. Lower detection rates of SARS-COV2 antibodies in cancer patients versus health care workers after symptomatic COVID-19. *Ann Oncol*. 2020 Aug;31(8):1087–8.
192. Epstude J, Harsch IA. Seroprevalence of COVID-19 antibodies in the cleaning and oncological staff of a municipal clinic. *GMS Hyg Infect Control* 15Doc18 [Internet]. 2020 Jul 23 [cited 2020 Oct 15]; Available from: <https://www.egms.de/en/journals/dgkh/2020-15/dgkh000353.shtml>
193. Armann JP, Unrath M, Kirsten C, Lueck C, Dalpke A, Berner R. Anti-SARS-CoV-2 IgG antibodies in adolescent students and their teachers in Saxony, Germany (SchoolCoviDD19): very low seroprevalence and transmission rates. *medRxiv*. 2020 Jan 1;2020.07.16.20155143.
194. Zöllkau J, Baier M, Scherag A, Schleußner E, Groten T. Periodenprävalenz von SARS-CoV-2 in einer unselektierten Stichprobe schwangerer Frauen in Jena, Thüringen. *Z Für Geburtshilfe Neonatol*. 2020 Aug;224(04):194–8.
195. Schmidt SB, Grüter L, Boltzmann M, Rollnik JD. Prevalence of serum IgG antibodies against SARS-CoV-2 among clinic staff. Adrish M, editor. *PLOS ONE*. 2020 Jun 25;15(6):e0235417.
196. Korth J, Wilde B, Dolff S, Anastasiou OE, Krawczyk A, Jahn M, et al. SARS-CoV-2-specific antibody detection in healthcare workers in Germany with direct contact to COVID-19 patients. *J Clin Virol*. 2020 Jul;128:104437.
197. Harsch IA, Skiba M, Konturek PC, Epstude J. Prevalence of antibodies against COVID-19 in the staff of a COVID-19 regular ward. *GMS Hyg Infect Control [Internet]*. 2020 May 14 [cited 2020 Jun 18];15. Available from: <https://www.ncbi.nlm.nih.gov/pmc/articles/PMC7273321/>
198. Behrens GM, Cossmann A, Stankov MV, Schulte B, Streeck H, Foerster R, et al. Strategic anti-SARS-CoV-2 serology testing in a low prevalence pandemic: The COVID-19 Contact (CoCo) Study in health care professionals. *medRxiv*. 2020 Aug 7;2020.08.06.20169250.
199. Behrens GMN, Cossmann A, Stankov MV, Schulte B, Streeck H, Förster R, et al. Strategic Anti-SARS-CoV-2 Serology Testing in a Low Prevalence Setting: The COVID-19 Contact (CoCo) Study in Healthcare Professionals. *Infect Dis Ther [Internet]*. 2020 Sep 4 [cited 2020 Nov 13]; Available from: <http://link.springer.com/10.1007/s40121-020-00334-1>
200. Kern PM, Müller H-H, Menzel T, Weisser H. Studie zur Immunität gegen SARS-CoV-2: Keine signifikante humorale Immunität gegen SARS-CoV-2 im medizinischen Personal eines Klinikums der Maximalversorgung und in der Stadtregion Fulda. *Klin*. 2020 Jun;49(06):268–73.
201. Kraehling V, Kern M, Halwe S, Mueller H, Rohde C, Savini M, et al. Epidemiological study to detect active SARS-CoV-2 infections and seropositive persons in a selected cohort of employees in the Frankfurt am Main metropolitan area. *medRxiv*. 2020 May 25;2020.05.20.20107730.

202. Lackermeier K, Williams F, Grzanna N, Lehmann E, Fichtner S, Kucher HB, et al. Infection with SARS-CoV-2 in primary care health care workers assessed by antibody testing. *Fam Pract*. 2020 Aug 7;:cmaa078.
203. Psychogiou M, Karabinis A, Pavlopoulou I, Basoulis D, Konstantinos L, Rapti V, et al. Antibodies against SARS-CoV-2 among health care workers in a country with low burden of COVID-19. *medRxiv [Internet]*. 2020 Jun 23; Available from: <https://www.medrxiv.org/content/10.1101/2020.06.23.20137620v1>
204. Norsa L, Cosimo P, Indriolo A, Sansotta N, D'Antiga L, Callegaro A. Asymptomatic Severe Acute Respiratory Syndrome Coronavirus 2 Infection in Patients With Inflammatory Bowel Disease Under Biologic Treatment. *Gastroenterology*. 2020 Aug;:S0016508520351179.
205. Cosma S, Borella F, Carosso A, Sciarrone A, Cusato J, Corcione S, et al. The “scar” of a pandemic: Cumulative incidence of COVID-19 during the first trimester of pregnancy. *J Med Virol*. 2020 Aug 13;:jmv.26267.
206. Lorenzo D, Carrisi C. COVID-19 exposure risk for family members of healthcare workers: An observational study. *Int J Infect Dis*. 2020 Sep;:98:287–9.
207. Cavaliere AF, Carabaneanu AI, Perelli F, Matarrese D, Brunelli T, Casprini P, et al. Universal screening for SARS-CoV-2 in pregnant women admitted for delivery: how to manage antibody testing? *J Matern Fetal Neonatal Med*. 2020 Jul 28;:1–2.
208. Maria Teresa Sandri, Elena Azzolini, Valter Torri, Sara Carloni, Michele Tedeschi, Massimo Castoldi, et al. IgG serology in health care and administrative staff populations from 7 hospitals representative of different exposures to SARS-CoV-2 in Lombardy, Italy. *medRxiv [Internet]*. 2020 May 26; Available from: <https://www.medrxiv.org/content/10.1101/2020.05.24.20111245v1.full.pdf>
209. Denina M, Pellegrino F, Morotti F, Coppo P, Bonsignori IM, Garazzino S, et al. All that glitters is not COVID: low prevalence of seroconversion against SARS-CoV-2 in a pediatric cohort of patients with Chilblain-like lesions. *J Am Acad Dermatol [Internet]*. 2020 Aug 8 [cited 2020 Sep 25]; Available from: <http://www.sciencedirect.com/science/article/pii/S0190962220324099>
210. Vena A, Berruti M, Adessi A, Blumetti P, Brignole M, Colognato R, et al. Prevalence of Antibodies to SARS-CoV-2 in Italian Adults and Associated Risk Factors. *J Clin Med*. 2020 Sep;:9(9):2780.
211. Carozzi FM, Cusi MG, Pistello M, Galli L, Bartoloni A, Anichini G, et al. Detection of asymptomatic SARS-CoV-2 infections among healthcare workers: results from a large-scale screening program based on rapid serological testing. *medRxiv [Internet]*. 2020 Aug 4 [cited 2020 Nov 13]; Available from: <http://medrxiv.org/lookup/doi/10.1101/2020.07.30.20149567>
212. Dalla Volta A, Valcamonico F, Pedersini R, Fornaro C, Tovazzi V, Monteverdi S, et al. The Spread of SARS-CoV-2 Infection Among the Medical Oncology Staff of ASST Spedali Civili of Brescia: Efficacy of Preventive Measures. *Front Oncol*. 2020 Aug 18;:10:1574.
213. Lahner E, Dilaghi E, Prestigiacomo C, Alessio G, Marcellini L, Simmaco M, et al. Prevalence of Sars-Cov-2 Infection in Health Workers (HWs) and Diagnostic Test Performance: The Experience of a Teaching Hospital in Central Italy. *Int J Environ Res Public Health [Internet]*. 2020 Jun [cited 2020 Jul 21];:17(12). Available from: <https://www.ncbi.nlm.nih.gov/pmc/articles/PMC7345358/>
214. Paradiso AV, Summa simona D, Silvestris N, Tommasi S, Tufaro A, Palma GD, et al. COVID-19 SCREENING AND MONITORING OF ASYMPTOMATIC HEALTH WORKERS WITH A RAPID SEROLOGICAL TEST. *medRxiv*. 2020 May 8;:2020.05.05.20086017.
215. Sotgiu G, Barassi A, Miozzo M, Saderi L, Piana A, Orfeo N, et al. SARS-CoV-2 specific serological pattern in healthcare workers of an Italian COVID-19 forefront hospital. *BMC Pulm Med*. 2020 Dec;:20(1):203.
216. Amendola A, Tanzi E, Folgori L, Barcellini L, Bianchi S, Gori M, et al. Low seroprevalence of SARS-CoV-2 infection among healthcare workers of the largest children hospital in Milan during the pandemic wave. *Infect Control Hosp Epidemiol*. 2020 Aug 6;:1–2.
217. Fusco FM, Pisaturo M, Iodice V, Bellopede R, Tambaro O, Parrella G, et al. COVID-19 among healthcare workers in a specialist infectious diseases setting in Naples, Southern Italy: results of a cross-sectional surveillance study. *J Hosp Infect*. 2020 Aug;:105(4):596–600.
218. Pancrazzi A, Magliocca P, Lorubbio M, Vaggelli G, Galano A, Mafucci M, et al. Comparison of serologic and molecular SARS-CoV 2 results in a large cohort in Southern Tuscany demonstrates a role for serologic testing to increase diagnostic sensitivity. *Clin Biochem*. 2020 Oct;:84:87–92.
219. Yong Chong, Naoki Tani, Hideyuki Ikematsu, Nobuto Terazawa, Hitoshi Nakashima, Nobuyuki Shimono, et al. Genetic testing and serological screening for SARS-CoV-2 infection in a COVID-19 outbreak in a nursing facility in Japan. *Res Sq [Internet]*. 2020 Nov 14; Available from: <https://doi.org/10.21203/rs.3.rs-64266/v1>
220. Suda G, Ogawa K, Kimura M, Maehara O, Kitagataya T, Ohara M, et al. Time-dependent changes in the seroprevalence of COVID-19 in asymptomatic liver disease outpatients in an area in Japan undergoing a second wave of COVID-19. *Hepatal Res*. 2020 Oct 1;:50(10):1196–200.
221. Nakamura A, Sato R, Ando S, Oana N, Nozaki E, Endo H, et al. Seroprevalence of Antibodies to SARS-CoV-2 in Healthcare Workers in Non-epidemic Region: A Hospital Report in Iwate Prefecture, Japan. *medRxiv*. 2020 Jan 1;:2020.06.15.20132316.

222. Denyer S. Japanese firm's blanket testing of employees could serve as model [Internet]. 2020. Available from: <https://www.lmtonline.com/news/article/Japanese-firm-s-blanket-testing-of-employees-15355433.php>
223. Jiji K. 0.43% found positive in SoftBank-led coronavirus antibody tests. The Japan Times [Internet]. 2020 Jun 10; Available from: <https://www.japantimes.co.jp/news/2020/06/10/national/softbank-coronavirus-antibody-tests/>
224. Fujita K, Shinpei Kada, Osamu Kanai, Hiroaki Hata, Takao Odagaki, Noriko Satoh-Asahara, et al. Quantitative SARS-CoV-2 antibody screening of healthcare workers in the southern part of Kyoto city during the COVID-19 peri-pandemic period. medRxiv [Internet]. 2020 May 20; Available from: <https://doi.org/10.1101/2020.05.12.20098962>
225. Doi A, Iwata K, Kuroda H, Hasuike T, Nasu S, Kanda A, et al. Estimation of seroprevalence of novel coronavirus disease (COVID-19) using preserved serum at an outpatient setting in Kobe, Japan: A cross-sectional study. medRxiv. 2020 May 1;2020.04.26.20079822.
226. Westerhuis BM, de Bruin E, Chandler FD, Ramakers CRB, Okba NMA, Li W, et al. Homologous and heterologous antibodies to coronavirus 229E, NL63, OC43, HKU1, SARS, MERS and SARS-CoV-2 antigens in an age stratified cross-sectional serosurvey in a large tertiary hospital in The Netherlands. medRxiv. 2020 Aug 24;2020.08.21.20177857.
227. Cox RJ, Brokstad KA, Krammer F, Langeland N, Bergen COVID-19 Research Group. Seroconversion in household members of COVID-19 outpatients. Blomberg B KK Lartey S, Linchausen DW, Mohn KG, Real FG, Bansal A, Bredholt G, Madsen A, Onanygo TB, Trieu MC, Vahokoski J, Zhou F, editor. Lancet Infect Dis. 2020;(101130150).
228. Song S-K, Lee D-H, Nam J-H, Kim K-T, Do J-S, Kang D-W, et al. IgG Seroprevalence of COVID-19 among Individuals without a History of the Coronavirus Disease Infection in Daegu, Korea. J KOREAN Med Sci. 2020 Jul 27;35(29).
229. Fernández-Rivas G, Quirant-Sánchez B, González V, Doladé M, Martínez-Caceres E, Piña M, et al. Seroprevalence of SARS-CoV-2 IgG Specific Antibodies among Healthcare Workers in the Northern Metropolitan Area of Barcelona, Spain, after the first pandemic wave. medRxiv. 2020 Jun 26;2020.06.24.20135673.
230. Soriano V, Meiriño R, Corral O, Guallar MP. Severe Acute Respiratory Syndrome Coronavirus 2 Antibodies in Adults in Madrid, Spain. Clin Infect Dis [Internet]. 2020 Jun 16 [cited 2020 Nov 14];(ciaa769). Available from: <https://doi.org/10.1093/cid/ciaa769>
231. Garralda Fernandez J, Molero Vilches I, Bermejo Rodriguez A, Cano de Torres I, Colino Romay EI, Garcia-Arata I, et al. Impact of SARS-CoV-2 pandemic among health care workers in a secondary teaching hospital in Spain. medRxiv. 2020 Jan 1;2020.07.26.20162529.
232. Valdivia A, Torres I, Huntley D, Alcaraz MJ, Albert E, Solano de la Asunción C, et al. Caveats in interpreting SARS-CoV-2 IgM+/IgG- antibody profile in asymptomatic health care workers. J Med Virol [Internet]. 2020 Aug 6 [cited 2020 Nov 14];n/a(n/a). Available from: <https://doi.org/10.1002/jmv.26400>
233. Galan I, Velasco M, Casas ML, Goyanes MJ, Rodriguez-Caravaca G, Losa JE, et al. SARS-CoV-2 Seroprevalence Among All Workers in a Teaching Hospital in Spain: Unmasking the risk. medRxiv. 2020 Jan 1;2020.05.29.20116731.
234. Olalla J, Correa AM, Martín-Escalante MD, Hortas ML, Martín-Sendarrubias MJ, Fuentes V, et al. Search for asymptomatic carriers of SARS-CoV-2 in healthcare workers during the pandemic: a Spanish experience. QJM Int J Med [Internet]. 2020 Aug 10 [cited 2020 Nov 14];(hcaa238). Available from: <https://doi.org/10.1093/qjmed/hcaa238>
235. Martín V, Fernández-Villa T, Lamuedra Gil de Gomez M, Mencía-Ares O, Rivero Rodríguez A, Reguero Celada S, et al. Prevalence of SARS-CoV-2 infection in general practitioners and nurses in primary care and nursing homes in the Healthcare Area of León and associated factors. COVID19 En Aten Primaria. 2020 Aug 1;46:35–9.
236. Garcia-Basteiro A.L., Moncunill G., Tortajada M., Vidal M., Guinovart C., Jimenez A., et al. Seroprevalence of antibodies against SARS-CoV-2 among health care workers in a large Spanish reference hospital. Nat Commun. 2020;11(1):3500.
237. Lidstrom A.-K., Sund F., Albinsson B., Lindback J., Westman G. Work at inpatient care units is associated with an increased risk of SARS-CoV-2 infection; a cross-sectional study of 8679 healthcare workers in Sweden. Ups J Med Sci. 2020;(Lidstrom, Sund, Westman) Department of Medical Sciences, Section of Infectious Diseases, Uppsala University, Uppsala, Sweden):1–6.
238. Rudberg A-S, Havervall S, Manberg A, Jernbom Falk A, Aguilera K, Ng H, et al. SARS-CoV-2 exposure, symptoms and seroprevalence in health care workers. medRxiv. 2020 Jan 1;2020.06.22.20137646.
239. Lindahl JF, Hoffman T, Esmailzadeh M, Olsen B, Winter R, Amer S, et al. High seroprevalence of SARS-CoV-2 in elderly care employees in Sweden. Infect Ecol Epidemiol. 2020 Jan 1;10(1):1789036.
240. Gulraj P. After in-house GHA screening programme, Govt rethinks its plans for anti-body tests. Gibraltar Chronicle [Internet]. 2020 Jun 17; Available from: <https://www.chronicle.gi/after-in-house-gha-screening-programme-govt-rethinks-its-plans-for-anti-body-tests/>
241. Pallett SJC, Rayment M, Patel A, Fitzgerald-Smith SAM, Denny SJ, Charani E, et al. Point-of-care serological assays for delayed SARS-CoV-2 case identification among health-care workers in the UK: a prospective multicentre cohort study. Lancet Respir Med. 2020 Sep;8(9):885–94.

242. Eyre DW, Lumley SF, O'Donnell D, Campbell M, Sims E, Lawson E, et al. Differential occupational risks to healthcare workers from SARS-CoV-2 observed during a prospective observational study. *eLife*. 2020 Aug 21;9.
243. Bampoe S, Lucas DN, Neall G, Sceales P, Aggarwal R, Caulfield K, et al. A cross-sectional study of immune seroconversion to SARS-CoV-2 in frontline maternity health professionals. *Anaesthesia*. 2020 Dec 1;75(12):1614–9.
244. Grant JJ, Wilmore SMS, McCann NS, Donnelly O, Lai RWL, Kinsella MJ, et al. Seroprevalence of SARS-CoV-2 antibodies in healthcare workers at a London NHS Trust. *Infect Control Hosp Epidemiol*. 2020 Aug 4;1–3.
245. Khalil A, Hill R, Wright A, Ladhani S, O'Brien P. SARS-CoV-2-Specific Antibody Detection in Healthcare Workers in a UK Maternity Hospital: Correlation With SARS-CoV-2 RT-PCR Results. *Clin Infect Dis*. 2020 Aug 8;ciaa893.
246. Poulidakos D., Sinha S., Kalra P.A. SARS-CoV-2 antibody screening in healthcare workers in a tertiary centre in North West England. *J Clin Virol*. 2020;129((Poulidakos) Clinical Director of Renal Services, Salford Royal NHS Foundation Trust, United Kingdom):104545.
247. Shields AM, Faustini SE, Perez-Toledo M, Jossi S, Aldera EL, Allen JD, et al. SARS-CoV-2 seroconversion in health care workers. *medRxiv*. 2020 May 19;2020.05.18.20105197.
248. Sikora K, Barwick I, Hamilton C. Serological prevalence of antibodies to SARS CoV-2 amongst cancer centre staff. *medRxiv*. 2020 May 1;2020.05.16.20099408.
249. Favara DM, Cooke A, Doffinger R, Houghton S, Budriunaite I, Bossingham S, et al. First results from the UK COVID-19 Serology in Oncology Staff Study (CSOS). *medRxiv*. 2020 Jun 23;2020.06.22.20136838.
250. Favara DM, Cooke A, Doffinger R, McAdam K, Corrie P, Ainsworth NL. COVID-19 Serology in Oncology Staff Study: Understanding SARS-CoV-2 in the Oncology Workforce. *Clin Oncol R Coll Radiol G B*. 2020;(ayi, 9002902).
251. McBride SM, Bundick K, Hubbeling H, Freret M, Modlin L, Kamboj M, et al. Results and Impact of Intensive SARS-CoV-2 Testing in a High Volume, Outpatient Radiation Oncology Clinic in a Pandemic Hotspot. *medRxiv*. 2020 Aug 14;2020.08.11.20172551.
252. Moscola J, Sembajwe G, Jarrett M, Farber B, Chang T, McGinn T, et al. Prevalence of SARS-CoV-2 Antibodies in Health Care Personnel in the New York City Area. *JAMA-J Am Med Assoc*. 2020 Sep 1;324(9):893–5.
253. Reifer J, Hayum N, Heszel B, Klagsbald I, Strevva VA. SARS-CoV-2 IgG antibody responses in New York City. *Diagn Microbiol Infect Dis*. 2020 Nov 1;98(3):115128.
254. Brant-Zawadzki M, Fridman D, Robinson P, Zahn M, German R, Breit M, et al. SARS-CoV-2 antibody prevalence in health care workers: Preliminary report of a single center study. *medRxiv*. 2020 Jul 25;2020.07.20.20158329.
255. Dora AV, Winnett A, Fulcher JA, Sohn L, Calub F, Lee-Chang I, et al. Using Serologic Testing to Assess the Effectiveness of Outbreak Control Efforts, Serial Polymerase Chain Reaction Testing, and Cohorting of Positive Severe Acute Respiratory Syndrome Coronavirus 2 Patients in a Skilled Nursing Facility. *Clin Infect Dis [Internet]*. 2020 Aug 28 [cited 2020 Nov 15];(ciaa1286). Available from: <https://doi.org/10.1093/cid/ciaa1286>
256. Flannery DD, Gouma S, Dhudasia MB, Mukhopadhyay S, Pfeifer MR, Woodford EC, et al. SARS-CoV-2 seroprevalence among parturient women in Philadelphia. *Sci Immunol*. 2020;5(49).
257. Gray A. Prevalence Of COVID-19 Antibodies In Washoe Co. Expected To Be Low. 2020 Jun 22; Available from: <https://www.kunr.org/post/prevalence-covid-19-antibodies-washoe-co-expected-be-low#stream/0>
258. Stavert R, Meydani-Korb A, de Leon D, Osgood R, Blau J, Luu T. Evaluation of SARS-CoV-2 antibodies in 24 patients presenting with chilblains-like lesions during the COVID-19 pandemic. *J Am Acad Dermatol*. 2020 Dec 1;83(6):1753–5.
259. Staletovich J. South Florida Cities Test Employees For Antibodies. *WLRN [Internet]*. 2020 May 22; Available from: <https://www.wlrn.org/health-care/2020-05-22/south-florida-cities-begin-testing-employees-for-covid-19-antibodies>
260. Jackson A. Almost everyone at one Michigan prison tests positive for COVID-19 antibodies. *Detroit Free Press [Internet]*. 2020 May 28; Available from: [https://www.petoskeynews.com/news/state-region/almost-everyone-at-one-michigan-prison-tests-positive-for-covid-19-antibodies/article\\_423c1ef0-a018-5b50-b746-c93fcb82f71f.html](https://www.petoskeynews.com/news/state-region/almost-everyone-at-one-michigan-prison-tests-positive-for-covid-19-antibodies/article_423c1ef0-a018-5b50-b746-c93fcb82f71f.html)
261. Leidner R, Frary A, Cramer J, Ball D, Weerasinghe R, Schmidt M, et al. Longitudinal SARS-CoV-2 serosurveillance of over ten thousand health care workers in the Providence Oregon cohort. *medRxiv*. 2020 Aug 18;2020.08.16.20176107.
262. Geraci L. Antibody tests show just 2% exposure rate to COVID-19. *The Lancaster News [Internet]*. 2020 May 23; Available from: <https://www.thelancasternews.com/content/antibody-tests-show-just-2-exposure-rate-covid-19>
263. Mughal MS, Kaur IP, Patton CD, Mikhail NH, Vareechon C, Granet KM. The prevalence of severe acute respiratory coronavirus virus 2 (SARS-CoV-2) IgG antibodies in intensive care unit (ICU) healthcare personnel (HCP) and its implications—a single-center, prospective, pilot study. *Infect Control Hosp Epidemiol*. 2020/06/12 ed. 2020;1–2.
264. Dietrich ML, Norton EB, Elliott D, Smira AR, Rouelle JA, Bond NG, et al. SARS-CoV-2 Seroprevalence Rates of Children in Louisiana During the State Stay at Home Order. *medRxiv*. 2020 Jul 8;2020.07.07.20147884.
265. Parker-Magyar A. Few among Long Hill first responders test positive for COVID-19 antibodies. *Echoes Sentinel News [Internet]*. 2020 Jun 1; Available from: [https://www.google.com/url?rct=j&sa=t&url=https://www.newjerseyhills.com/echoes-sentinel/news/few-among-long-hill-first-responders-test-positive-for-covid-19-antibodies/article\\_007ac367-b3b2-5375-b471-](https://www.google.com/url?rct=j&sa=t&url=https://www.newjerseyhills.com/echoes-sentinel/news/few-among-long-hill-first-responders-test-positive-for-covid-19-antibodies/article_007ac367-b3b2-5375-b471-)

- f0a817998f62.html&ct=ga&cd=CAAYFDIaOTBkZWE5ODk5NGU5MTg1OTpj206ZW46VVM&usg=AFQjCNH Wg839bXiyzOxO1Y7-QOECGMRCMw
266. Hunter BR, Dbeibo L, Weaver CS, Beeler C, Saysana M, Zimmerman MK, et al. Seroprevalence of severe acute respiratory coronavirus virus 2 (SARS-CoV-2) antibodies among healthcare workers with differing levels of coronavirus disease 2019 (COVID-19) patient exposure. *Infect Control Hosp Epidemiol.* undefined/ed;1–2.
  267. Ripperger TJ, Uhrlaub JL, Watanabe M, Wong R, Castaneda Y, Pizzato HA, et al. Detection, prevalence, and duration of humoral responses to SARS-CoV-2 under conditions of limited population exposure. *medRxiv.* 2020 Aug 16;2020.08.14.20174490.
  268. Sydney ER, Kishore P, Laniado I, Rucker LM, Bajaj K, Zinaman MJ. Antibody evidence of SARS-CoV-2 infection in healthcare workers in the Bronx. *Infect Control Hosp Epidemiol.* 2020/08/26 ed. 2020;41(11):1348–9.
  269. Reagan N. Results show 2% of tested MUSC staff have COVID-19 antibodies. *Live 5 News* [Internet]. 2020 May 4; Available from: <https://www.live5news.com/2020/05/04/results-show-tested-musc-staff-have-covid-antibodies/>
  270. Jeremias A, Nguyen J, Levine J, Pollack S, Engellenner W, Thakore A, et al. Prevalence of SARS-CoV-2 Infection Among Health Care Workers in a Tertiary Community Hospital. *JAMA Intern Med* [Internet]. 2020 Aug 11 [cited 2020 Nov 15]; Available from: <https://doi.org/10.1001/jamainternmed.2020.4214>
  271. Cohen DE, Marlowe G, Contreras G, Sosa MA, Mendoza JM, Lenz O, et al. Assessment of a Laboratory-Based SARS-CoV-2 Antibody Test Among Hemodialysis Patients: A Quality Improvement Initiative. *medRxiv.* 2020 Aug 4;2020.08.03.20163642.
  272. Payne DC, Smith-Jeffcoat SE, Nowak G, Chukwuma U, Geibe JR, Hawkins RJ, et al. SARS-CoV-2 Infections and Serologic Responses from a Sample of U.S. Navy Service Members - USS Theodore Roosevelt, April 2020. Tiller R GR Rogers S, Whitaker B, Kondas A, Smith P, Lee C, Graziano J, editor. *MMWR Morb Mortal Wkly Rep.* 2020;69(23):714–21.
  273. Kiefer MK, McKiever ME, Russo JR, Ma'ayeh M, Gee SE, Smith DD, et al. Exposure and seroconversion to severe acute respiratory syndrome coronavirus 2 among obstetrical healthcare providers following a contained outbreak. *Am J Obstet Gynecol.* 2020 Oct 1;223(4):601-603.e2.
  274. Slusser S. MLB antibody study: 0.7% of those tested had been exposed to coronavirus. *San Francisco Chronicle* [Internet]. 2020 May 10; Available from: <https://www.sfchronicle.com/athletics/article/MLB-antibody-study-7-percent-exposed-to-15260314.php>
  275. McCormack J. What the Coronavirus-Antibody Study of Major League Baseball Tells Us. *National Review* [Internet]. 2020 May 11; Available from: <https://www.nationalreview.com/2020/05/coronavirus-antibody-study-major-league-baseball-herd-immunity/>
  276. Morcuende M, Guglielminotti J, Landau R. Anesthesiologists' and Intensive Care Providers' Exposure to COVID-19 Infection in a New York City Academic Center: A Prospective Cohort Study Assessing Symptoms and COVID-19 Antibody Testing. *Anesth Analg.* 2020 Sep;131(3):669–76.
  277. Stock AD, Bader ER, Cezayirli P, Inocencio J, Chalmers SA, Yassari R, et al. COVID-19 Infection Among Healthcare Workers: Serological Findings Supporting Routine Testing. *Front Med.* 2020;7:471.
  278. Madsen T, Levin N, Niehus K, Law K, Mayer J, Chapman M, et al. Prevalence of IgG antibodies to SARS-CoV-2 among emergency department employees. *Am J Emerg Med.* 2020 May 3;
  279. Caban-Martinez AJ, Schaefer-Solle N, Santiago K, Louzado-Feliciano P, Brotons A, Gonzalez M, et al. Epidemiology of SARS-CoV-2 antibodies among firefighters/paramedics of a US fire department: a cross-sectional study. *Occup Environ Med.* 2020 Dec 1;77(12):857.
  280. Hains D.S., Schwaderer A.L., Carroll A.E., Starr M.C., Wilson A.C., Amanat F., et al. Asymptomatic Seroconversion of Immunoglobulins to SARS-CoV-2 in a Pediatric Dialysis Unit. *JAMA - J Am Med Assoc.* 2020;(Hains, Schwaderer, Carroll, Starr, Wilson) Department of Pediatrics, Indiana University, 699 Riley Hospital Dr, RR230, Indianapolis, IN 46202, United States):8438.
  281. Stubblefield WB, Talbot HK, Feldstein LR, Tenforde MW, Rasheed MAU, Mills L, et al. Seroprevalence of SARS-CoV-2 Among Frontline Healthcare Personnel During the First Month of Caring for Patients With COVID-19—Nashville, Tennessee. *Clin Infect Dis* [Internet]. 2020 Jun 6 [cited 2020 Nov 15];(c1aa936). Available from: <https://doi.org/10.1093/cid/c1aa936>
  282. Goldberg SA, Lennerz J, Klompas M, Mark E, Pierce VM, Thompson RW, et al. Presymptomatic Transmission of Severe Acute Respiratory Syndrome Coronavirus 2 Among Residents and Staff at a Skilled Nursing Facility: Results of Real-time Polymerase Chain Reaction and Serologic Testing. *Clin Infect Dis* [Internet]. 2020 Jul 15 [cited 2020 Nov 15];(c1aa991). Available from: <https://doi.org/10.1093/cid/c1aa991>
  283. Mansour M, Leven E, Muellers K, Stone K, Mendu DR, Wajnberg A. Prevalence of SARS-CoV-2 Antibodies Among Healthcare Workers at a Tertiary Academic Hospital in New York City. *J Gen Intern Med.* 2020 Aug 1;35(8):2485–6.
  284. Chu VT, Freeman-Ponder B, Lindquist S, Spitters C, Kawakami V, Dyal JW, et al. Investigation and Serologic Follow-Up of Contacts of Early Confirmed Case-Patient with COVID-19, Washington, USA. *Emerg Infect Dis.* 2020 Aug;26(8):1671–8.

285. Kassem AM, Talaat H, Shawky S, Fouad R, Amer K, Elnagdy T, et al. SARS-CoV-2 infection among healthcare workers of a gastroenterological service in a tertiary care facility. *Arab J Gastroenterol.* 2020 Sep 1;21(3):151–5.
286. Kammon A, El-Arabi AA, Erhouma EA, Mehemed TM, Mohamed OA. Seroprevalence of antibodies against SARS-CoV-2 among public community and health-care workers in Alzintan City of Libya. *medRxiv.* 2020 May 26;2020.05.25.20109470.
287. Alkurt G, Murt A, Aydin Z, Tatli O, Agaoglu NB, Irvem A, et al. Seroprevalence of Coronavirus Disease 2019 (COVID-19) Among Health Care Workers from Three Pandemic Hospitals of Turkey. *medRxiv.* 2020 Aug 22;2020.08.19.20178095.
288. Ray A, Singh K, Chattopadhyay S, Mehdi F, Batra G, Gupta A, et al. Seroprevalence of anti-SARS-CoV-2 IgG antibodies in hospitalized patients at a tertiary referral center in North India. *medRxiv.* 2020 Aug 26;2020.08.22.20179937.
289. Unclear. Ahmedabad has no herd immunity, only 17.6% have antibodies. *The Times of India* [Internet]. Available from: <https://timesofindia.indiatimes.com/city/ahmedabad/ahmedabad-has-no-herd-immunity-only-17-6-have-antibodies/articleshow/77137851.cms>
290. Rao S. Covid-19: Jayadeva says its survey hints at herd immunity. *Times of India* [Internet]. 2020 Jun 6; Available from: <https://timesofindia.indiatimes.com/city/bengaluru/covid-19-jayadeva-says-its-survey-hints-at-herd-immunity/articleshow/76228490.cms>
291. Chughtai O, Batool H, Khan M, Chughtai A. Frequency of COVID-19 IgG Antibodies among Special Police Squad Lahore, Pakistan. *J Coll Physicians Surg Pak.* 2020 Jul 1;30(7):735–9.
292. He L, Zeng Y, Zeng C, Zhou Y, Li Y, Xie X, et al. Positive Rate of Serology and RT-PCR for COVID-19 among healthcare workers during different periods in Wuhan, China. *J Infect* [Internet]. [cited 2020 Nov 15]; Available from: <https://doi.org/10.1016/j.jinf.2020.08.027>
293. Liang W, Lin Y, Bi J, Li J, Liang Y, Wong S-S, et al. Serosurvey of SARS-CoV-2 among hospital visitors in China. *Cell Res.* 2020 Sep 1;30(9):817–8.
294. Liu M, Cheng S-Z, Xu K-W, Yang Y, Zhu Q-T, Zhang H, et al. Use of personal protective equipment against coronavirus disease 2019 by healthcare professionals in Wuhan, China: cross sectional study. *BMJ* [Internet]. 2020;369. Available from: <https://www.bmj.com/content/369/bmj.m2195>
295. Wu X, Fu B, Chen L, Feng Y. Serological tests facilitate identification of asymptomatic SARS-CoV-2 infection in Wuhan, China. *J Med Virol.* 2020 Oct 1;92(10):1795–6.
296. Xu X, Sun J, Nie S, Li H, Kong Y, Liang M, et al. Seroprevalence of immunoglobulin M and G antibodies against SARS-CoV-2 in China. *Nat Med.* 2020 Aug 1;26(8):1193–5.
297. Zhang A, Hu Q, Liu A, Wang S, Jin S, Wang Y, et al. Prevention of COVID-19 infection in a pediatric oncology ward in Wuhan. *Pediatr Blood Cancer.* 2020 Oct 1;67(10):e28424.
298. Tang H, Tian J-B, Dong J-W, Tang X-T, Yan Z-Y, Zhao Y-Y, et al. Serologic Detection of SARS-CoV-2 Infections in Hemodialysis Centers: A Multicenter Retrospective Study in Wuhan, China. *Am J Kidney Dis.* 2020 Oct 1;76(4):490-499.e1.
299. Tu D, Shu J, Wu X, Li H, Xia Z, Zhang Y, et al. Immunological detection of serum antibodies in pediatric medical workers exposed to varying levels of SARS-CoV-2. *J Infect* [Internet]. [cited 2020 Nov 15]; Available from: <https://doi.org/10.1016/j.jinf.2020.07.023>
300. Zhang C, Lin L, Tang D, Liu F, Li M, Li Q, et al. Antibody responses to SARS-CoV-2 in healthy individuals returning to Shenzhen. *J Med Virol* [Internet]. 2020 Jul 25 [cited 2020 Nov 15];n/a(n/a). Available from: <https://doi.org/10.1002/jmv.26355>
301. Xiong S, Guo C, Dittmer U, Zheng X, Wang B. The prevalence of antibodies to SARS-CoV-2 in asymptomatic healthcare workers with intensive exposure to COVID-19. *medRxiv.* 2020 Jun 2;2020.05.28.20110767.
302. Zhao D, Wang M, Wang M, Zhao Y, Zheng Z, Li X, et al. Asymptomatic infection by SARS-CoV-2 in healthcare workers: A study in a large teaching hospital in Wuhan, China. *Int J Infect Dis.* 2020 Oct 1;99:219–25.
303. Chen Y, Tong X, Wang J, Huang W, Yin S, Huang R, et al. High SARS-CoV-2 antibody prevalence among healthcare workers exposed to COVID-19 patients. *J Infect.* 2020/06/04 ed. 2020 Sep;81(3):420–6.
304. Zhang J, Liu J, Li N, Liu Y, Ye R, Qin X, et al. Serological detection of 2019-nCoV respond to the epidemic: A useful complement to nucleic acid testing. *medRxiv.* 2020 Mar 10;2020.03.04.20030916.
305. Zhang J, Zhang X, Liu J, Ban Y, Li N, Wu Y, et al. Serological detection of 2019-nCoV respond to the epidemic: A useful complement to nucleic acid testing. *Int Immunopharmacol.* 2020 Nov 1;88:106861.
306. Nopsopon T, Pongpirul K, Chotirosniramit K, Hiransuthikul N. COVID-19 Antibody in Thai Community Hospitals. *medRxiv.* 2020 Jul 4;2020.06.24.20139188.
307. Chibwana MG, Jere KC, kamng'ona R, Mandolo J, Katunga-Phiri V, Tembo D, et al. High SARS-CoV-2 seroprevalence in Health Care Workers but relatively low numbers of deaths in urban Malawi. *medRxiv.* 2020 Aug 5;2020.07.30.20164970.
308. Asuquo MI, Effa E, Otu A, Ita O, Udoh U, Umoh V, et al. Prevalence of IgG and IgM antibodies to SARS-CoV-2 among clinic staff and patients. *medRxiv.* 2020 Jul1;2020.07.02.20145441.

309. Halatoko WA, KONU YR, Gbeasor-Komlanvi FA, Sadio AJ, Tchankoni MK, Komlanvi KS, et al. Prevalence of SARS-CoV-2 among high-risk populations in Lomé (Togo) in 2020. medRxiv. 2020 Aug 7;2020.08.07.20163840.
310. Houlihan C.F., Vora N., Byrne T., Lewer D., Kelly G., Heaney J., et al. Pandemic peak SARS-CoV-2 infection and seroconversion rates in London frontline health-care workers. *Lancet Lond Engl.* 2020;((Houlihan) Department of Clinical Virology, University College London Hospitals, London W1T 4EU, UK; Department of Infection and Immunity, University College London, London, UK; Department of Clinical Research, London School of Hygiene&Tropical Medicine, London, UK).
